# Supplementary material for: Nickel-catalyzed manipulation of tertiary phosphines via highly selective C–P bond cleavage
Source: Royal Society of Chemistry journal article supplement (doi:10.1039/c3cc43640c), 2013-01-01

# Nickel-Catalyzed Manipulation on Tertiary Phosphines via Highly Selective C-P Bond Cleavage

Jian Cao<sup>a</sup>, Xian Huang<sup>a,b, ‡</sup> and Luling Wu<sup>\*a</sup>

<sup>a</sup> Department of Chemistry, Zhejiang University, Hangzhou 310028, P. R. China

<sup>b</sup> State Key Laboratory of Organometallic Chemistry, Shanghai Institute of Organic Chemistry,  
Chinese Academy of Sciences, Shanghai 200032, P. R. China

<sup>‡</sup> Prof. Huang passed away on March 6, 2010. He had been fully in charge of this project. At this moment, Prof. Luling Wu is helping him to finish all the projects with the help from Prof. Shengming Ma

## Supporting Information

### List of contents

|                                                                                      |     |
|--------------------------------------------------------------------------------------|-----|
| 1. Table S1, Figure S1, and X-ray crystal data for <b>3a</b> , <b>3k</b> , <b>3l</b> | S2  |
| 2. Experimental Procedures                                                           | S4  |
| General Methods and Procedure for Synthesis of <b>3a-3w</b>                          | S4  |
| 3. <sup>1</sup> H NMR and <sup>13</sup> C NMR Spectra                                | S27 |

Table S1. Optimization of reaction conditions for the nickel-catalyzed ring-opening coupling of triphenylphosphine (**1a**) with 1-(diphenylmethylene)-1H-cyclopropa[*b*]naphthalene (**2a**)<sup>a</sup>

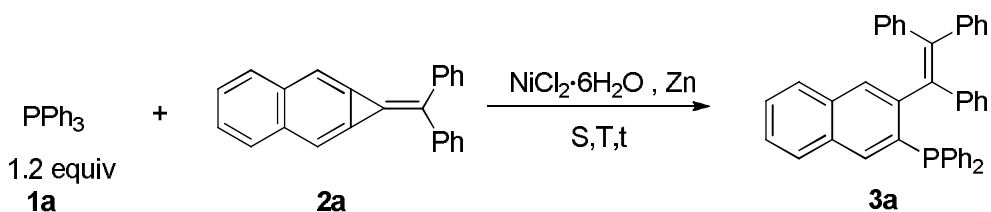

| entry    | $\text{NiCl}_2 \cdot 6\text{H}_2\text{O}$ / Zn (%) | solvent / concentration | T(°C)      | time (h)   | yield of <b>3a</b> (%) |
|----------|----------------------------------------------------|-------------------------|------------|------------|------------------------|
| 1        | no                                                 | dioxane /0.1M           | 110        | 24         | N.R.                   |
| 2        | 10/30                                              | dioxane /0.1M           | 110        | 2          | 96                     |
| 3        | 5/15                                               | dioxane /0.1M           | 110        | 5          | 96                     |
| 4        | 2/6                                                | dioxane /0.1M           | 110        | 10         | 96                     |
| <b>5</b> | <b>2/6</b>                                         | <b>dioxane /0.2M</b>    | <b>110</b> | <b>0.5</b> | <b>96</b>              |
| 6        | 2/6                                                | dioxane /0.4M           | 110        | 0.5        | 92                     |
| 7        | 2/6                                                | toluene/0.2M            | 110        | 17         | 96                     |
| 8        | 2/6                                                | $\text{CHCl}_3$ /0.2M   | 70         | 24         | <10 <sup>c</sup>       |
| 8        | 2/6                                                | THF/0.2M                | 70         | 2          | 93                     |
| 10       | 2/6                                                | acetone/0.2M            | 70         | 24         | 30 <sup>d</sup>        |
| 11       | 2/6                                                | DMF/0.2M                | 110        | 1          | 94                     |
| 12       | 2/6                                                | DMSO/0.2M               | 110        | 4          | 90                     |

<sup>a</sup> The reaction was conducted with 0.24 mmol of **1a**, 0.2 mmol of **2a**, and corresponding of  $\text{NiCl}_2 \cdot 6\text{H}_2\text{O}$ , Zn and solvent. <sup>b</sup> Isolated yield. <sup>c</sup> 80% of **2a** was recovered. <sup>d</sup> 60% of **2a** was recovered.

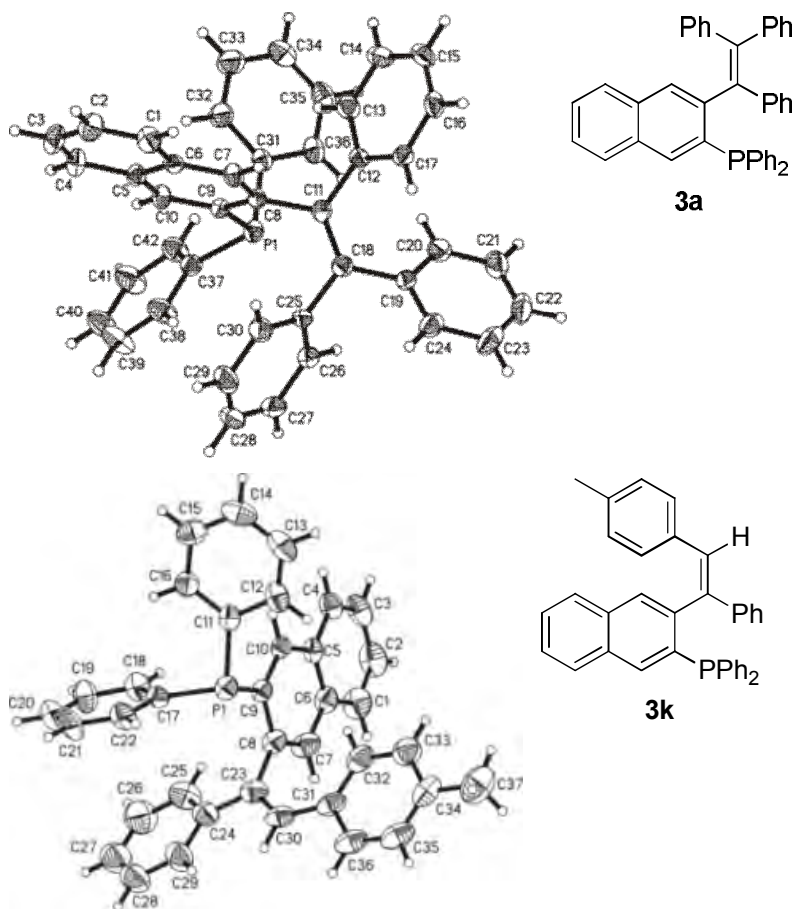

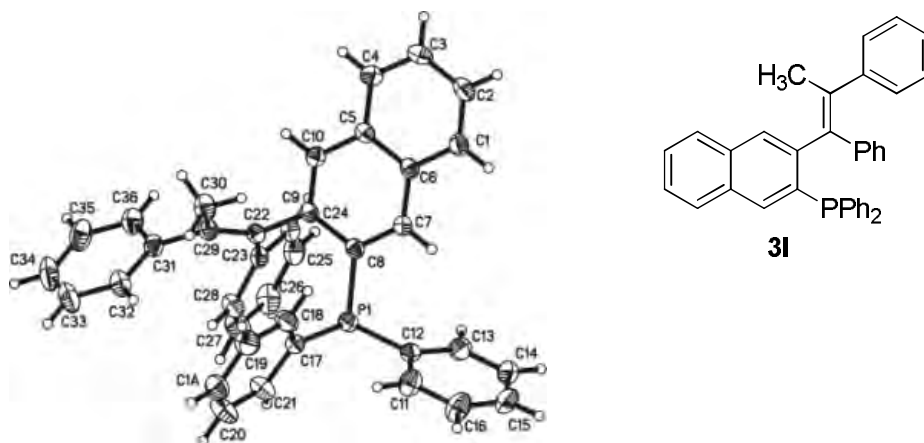

Figure 1. ORTEP representation of **3a**, **3k** and **3l**.

a) X-ray crystal data for **3a**: C<sub>42</sub>H<sub>31</sub>P; *M*=566.64; crystal system: monoclinic; space group: *P* 2<sub>1</sub>/*c*; final *R* indices [*I* > 2σ(*I*)] *R*1= 0.0494, *wR*2= 0.1149, *R* indices (all data) *R*1= 0.0670, *wR*2= 0.1249; *a*= 10.0368(3) Å, *b*= 30.8934(8) Å, *c*= 10.8177(4) Å; α= 90.00, β= 109.139(4), γ= 90.00, *V*= 3168.85(17) Å<sup>3</sup>, *T*=293(2) K, *Z*=4; F(000) 1192; reflections collected/unique: 13835/5789 [*R*(int)= 0.0260]; number of observations [*I* > 2σ(*I*)]: 4487; parameters: 388. Supplementary crystallographic data have been deposited at the Cambridge Crystallographic Data Centre, CCDC 903816. b) X-ray crystal data for **3k**: C<sub>37</sub>H<sub>29</sub>P; *M*=504.57; crystal system: monoclinic; space group: *P* 2<sub>1</sub>/*c*; final *R* indices [*I* > 2σ(*I*)] *R*1= 0.0797, *wR*2= 0.1938, *R* indices (all data) *R*1= 0.1220, *wR*2= 0.2221; *a*= 9.8232(11) Å, *b*= 30.276(2) Å, *c*= 10.9053(19) Å; α= 90.00, β= 120.527(9), γ= 90.00, *V*= 2793.8(6) Å<sup>3</sup>, *T*=293(2) K, *Z*=4; F(000) 1064; reflections collected/unique: 11860/5090 [*R*(int)= 0.0378]; number of observations [*I* > 2σ(*I*)]: 3274; parameters: 344. Supplementary crystallographic data have been deposited at the Cambridge Crystallographic Data Centre, CCDC 917493. c) X-ray crystal data for **3l**: C<sub>37</sub>H<sub>29</sub>P; *M*=504.57; crystal system: monoclinic; space group: *P* 2<sub>1</sub>/*c*; final *R* indices [*I* > 2σ(*I*)] *R*1= 0.0458, *wR*2= 0.0982, *R* indices (all data) *R*1= 0.0705, *wR*2= 0.1100; *a*= 9.8506(5) Å, *b*= 9.3011(4) Å, *c*= 29.8411(11) Å; α= 90.00, β= 93.387(3), γ= 90.00, *V*= 2729.3(2) Å<sup>3</sup>, *T*=293(2) K, *Z*=4; F(000) 1064; reflections collected/unique: 15308 / 4992 [*R*(int)= 0.0358]; number of observations [*I* > 2σ(*I*)]: 3621; parameters: 344. Supplementary crystallographic data have been deposited at the Cambridge Crystallographic Data Centre, CCDC 917494.

### General Experimental Procedures:

1,4-Dioxane, PhMe and THF were distilled from Na/benzophenone immediately prior to use. Petroleum ether refers to the fraction with the boiling point in the range 60 °C-90 °C. All <sup>1</sup>H NMR (400 MHz) and <sup>13</sup>C NMR (100 MHz) spectra were measured in CDCl<sub>3</sub> with TMS as the internal standard unless noted otherwise. Chemical shifts are expressed in ppm, and *J* values are given in Hz. The other commercially available chemicals were purchased and used without further purification unless noted otherwise.

### General Experimental Procedures:

#### (1) Diphenyl[3-(1,2,2-triphenylvinyl)naphthalen-2-yl]phosphine (3a)

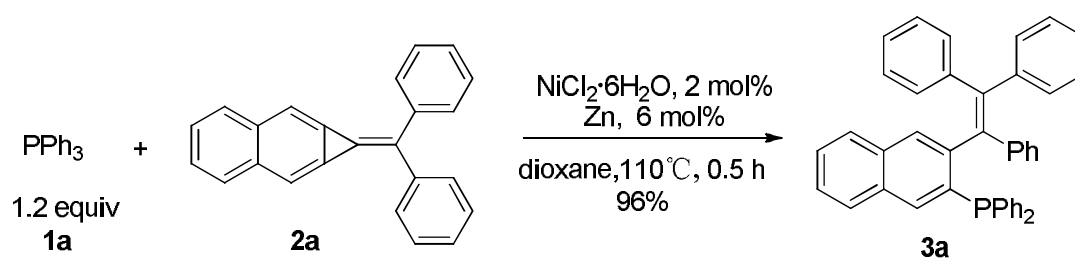

**Typical procedure:** A rubber-capped Schlenk vessel containing NiCl<sub>2</sub>·6H<sub>2</sub>O (1 mg, 0.004 mmol), Zn (1 mg, 0.012 mmol), PPh<sub>3</sub> (**1a**, 63 mg, 0.24 mmol) and 1-(diphenylmethylene)-1H-cyclopropa[b]naphthalene (**2a**, 61 mg, 0.2 mmol) was degassed and backfilled with nitrogen for three times, then dioxane (1 mL) was added to the Schlenk vessel. The resulting mixture was then allowed to stir at 110 °C. After the reaction was completed as monitored by TLC, The reaction mixture was filtered through a short pad of silica gel. The filtrate was concentrated under reduced pressure, and the residue was purified by silica gel chromatography (petroleum ether/CH<sub>2</sub>Cl<sub>2</sub> = 10:1) to afford **3a** (109 mg, 96%) as a white solid: m.p. 220-222 °C (petroleum ether/CH<sub>2</sub>Cl<sub>2</sub>); <sup>1</sup>H NMR (400 MHz, CDCl<sub>3</sub>, 25 °C):

$\delta = 7.68-7.61$  (m, 2H),  $7.54$  (d,  $J = 7.2\text{Hz}$ , 2H),  $7.37-7.28$  (m, 2H),  $7.24-7.04$  (m, 15H),  $6.96-6.88$  (m, 5H),  $6.82-6.76$  (m, 5H) ppm;  $^{31}\text{P}$  NMR (162 MHz,  $\text{CDCl}_3$ ,  $25^\circ\text{C}$ ):  $\delta = -13.80$  ppm;  $^{13}\text{C}$  NMR (100 MHz,  $\text{CDCl}_3$ ,  $25^\circ\text{C}$ ):  $\delta = 146.6$  (d,  $J = 31.5\text{Hz}$ ),  $143.72$ ,  $143.69$ ,  $142.8$ ,  $142.3$ ,  $142.3$ ,  $140.5$  (d,  $J = 4.6\text{Hz}$ ),  $138.9$  (d,  $J = 13.7\text{Hz}$ ),  $136.9$  (d,  $J = 13.7\text{Hz}$ ),  $136.7$ ,  $136.2$ ,  $136.1$  (d,  $J = 14.1\text{Hz}$ ),  $134.0$  (d,  $J = 20.0\text{Hz}$ ),  $133.5$ ,  $133.0$  (d,  $J = 17.5\text{Hz}$ ),  $132.2$ ,  $131.6$ ,  $131.5$ ,  $131.4$ ,  $130.9$  (d,  $J = 7.3\text{Hz}$ ),  $128.2$  (d,  $J = 12.9\text{Hz}$ ),  $128.14$ ,  $128.12$ ,  $128.0$ ,  $127.9$ ,  $127.7$ ,  $127.5$ ,  $127.4$ ,  $127.2$ ,  $126.6$  (d,  $J = 17.8\text{Hz}$ ),  $126.2$  (d,  $J = 18.3\text{Hz}$ ),  $125.7$  ppm; MS(ED):  $m/z$  (%) =  $566$  ( $\text{M}^+$ , 25.0); IR (neat):  $3056$ ,  $1583$ ,  $1492$ ,  $1436$ ,  $1264$ ,  $1195$ ,  $1115$ ,  $1029\text{ cm}^{-1}$ ; HRMS calcd. for  $\text{C}_{42}\text{H}_{32}\text{P}$  ( $(\text{M}+1)^+$ ):  $567.2236$ ; found:  $567.2246$ .

The following compounds were prepared according to this procedure.

## (2) Diphenyl[3-(1-phenyl-2,2-di-*p*-tolylvinyl)naphthalen-2-yl]phosphine (3b)

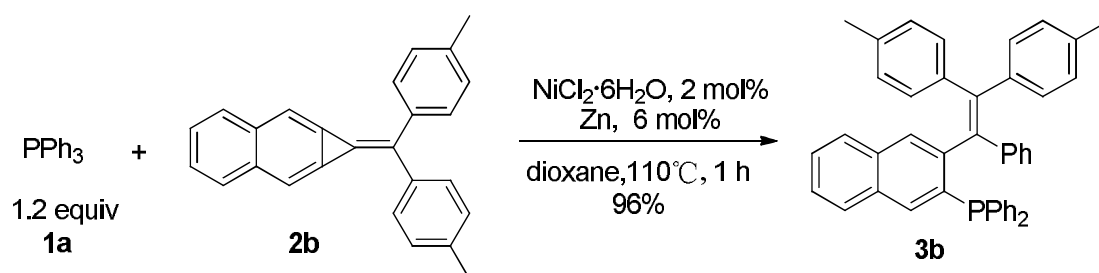

The reaction of  $\text{NiCl}_2 \cdot 6\text{H}_2\text{O}$  (1 mg, 0.004 mmol),  $\text{Zn}$  (1 mg, 0.012 mmol),  $\text{PPh}_3$  (**1a**, 63 mg 0.24 mmol) and **2b** (66 mg, 0.2 mmol) in dioxane (1 mL) afforded **3b** (114 mg, 96%) as a white solid (eluent: petroleum ether/ $\text{CH}_2\text{Cl}_2 = 10:1$ ): m.p.  $219-221^\circ\text{C}$  (petroleum ether/ $\text{CH}_2\text{Cl}_2$ );  $^1\text{H}$  NMR (400 MHz,  $\text{CDCl}_3$ ,  $25^\circ\text{C}$ ):  $\delta = 7.68-7.61$  (m, 2H),  $7.57-7.53$  (m, 2H),  $7.37-7.28$  (m, 2H),  $7.24-6.98$  (m, 12H),  $6.96-6.88$  (m, 4H),  $6.84-6.77$  (m, 5H),  $6.73$  (d,  $J = 7.2\text{Hz}$ , 2H),  $2.25$  (s, 3H),  $2.14$  (s, 3H) ppm;  $^{31}\text{P}$  NMR (162 MHz,  $\text{CDCl}_3$ ,  $25^\circ\text{C}$ ):  $\delta = -13.87$  ppm;  $^{13}\text{C}$  NMR (100 MHz,  $\text{CDCl}_3$ ,  $25^\circ\text{C}$ ):  $\delta = 147.0$  (d,  $J = 31.3\text{Hz}$ ),  $143.3$ ,  $142.2$ ,  $140.90$ ,

140.88, 139.4 (d,  $J = 5.5\text{Hz}$ ), 139.0 (d,  $J = 14.1\text{Hz}$ ), 137.2 (d,  $J = 13.9\text{Hz}$ ), 136.79, 136.77, 136.1 (d,  $J = 13.8\text{Hz}$ ), 135.9 (d,  $J = 28.2\text{Hz}$ ), 133.9 (d,  $J = 21.6\text{Hz}$ ), 133.5, 132.9 (d,  $J = 18.4\text{Hz}$ ), 132.2, 131.6, 131.43, 131.38, 130.9 (d,  $J = 6.9\text{Hz}$ ), 128.4, 128.2, 128.1, 128.0(broad peak, 2C), 127.9, 127.6, 127.5, 127.2, 126.6, 125.8, 125.6, 21.2, 21.1 ppm; MS(EI):  $m/z$  (%) = 594 ( $M^+$ , 79.0), 503 (100); IR (neat): 3050, 1636, 1558, 1541, 1508, 1489, 1457, 1435, 1276, 1261, 1182, 1114, 1025  $\text{cm}^{-1}$ ; HRMS calcd. for  $C_{44}H_{36}P$  ( $(M+1)^+$ ): 595.2549; found: 595.2561.

### (3) Diphenyl[3-(1-phenyl-2,2-di-*m*-tolylvinyl)naphthalen-2-yl]phosphine (3c)

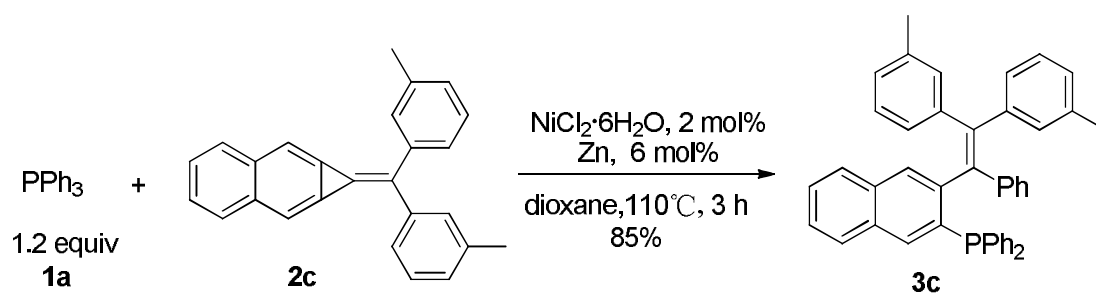

The reaction of NiCl<sub>2</sub>·6H<sub>2</sub>O (1 mg, 0.004 mmol), Zn (1 mg, 0.012 mmol), PPh<sub>3</sub> (**1a**, 63 mg 0.24 mmol) and **2c** (66 mg, 0.2 mmol) in dioxane (1 mL) afforded **3c** (101 mg, 85%) as a white solid (eluent: petroleum ether/CH<sub>2</sub>Cl<sub>2</sub> = 10:1): m.p. 190-192 °C (petroleum ether/CH<sub>2</sub>Cl<sub>2</sub>); <sup>1</sup>H NMR (400 MHz, CDCl<sub>3</sub>, 25 °C):  $\delta$  = 7.66 (d,  $J = 5.2\text{Hz}$ , 2H), 7.59-7.53 (m, 2H), 7.41-7.28 (m, 2H), 7.25-7.07 (m, 6H), 7.07-6.91 (m, 10H), 6.89-6.75 (m, 7H), 2.17 (s, 3H), 2.01 (s, 3H) ppm; <sup>31</sup>P NMR (162 MHz, CDCl<sub>3</sub>, 25 °C):  $\delta$  = -13.97 ppm; <sup>13</sup>C NMR (100 MHz, CDCl<sub>3</sub>, 25 °C):  $\delta$  = 146.7 (d,  $J = 33.2\text{Hz}$ ), 143.7, 143.5, 142.7, 142.4, 140.3(d,  $J = 5.5\text{Hz}$ ), 139.2 (d,  $J = 13.3\text{Hz}$ ), 137.0, 136.9, 136.7, 136.1 (d,  $J = 13.9\text{Hz}$ ), 133.9 (d,  $J = 20.8\text{Hz}$ ), 133.5, 132.9 (d,  $J = 18.1\text{Hz}$ ), 132.2, 132.1, 131.8, 131.6, 130.8 (d,  $J = 6.5\text{Hz}$ ), 128.6, 128.4, 128.2, 128.15, 128.09, 128.0, 127.9, 127.8, 127.7, 127.5, 127.4, 127.23, 127.18, 127.1,

126.6, 126.0, 125.6, 21.3, 21.2 ppm; MS(EI):  $m/z$  (%) = 594 ( $M^+$ , 32.0), 503 (100); IR (neat): 3051, 1600, 1484, 1436, 1266, 1197, 1116, 1094, 1028  $\text{cm}^{-1}$ ; HRMS calcd. for  $\text{C}_{44}\text{H}_{36}\text{P}$  ( $(M+1)^+$ ): 595.2549; found: 595.2561.

**(4) Diphenyl[3-(1-phenyl-2,2-di-*o*-tolylvinyl)naphthalen-2-yl]phosphine (3d)**

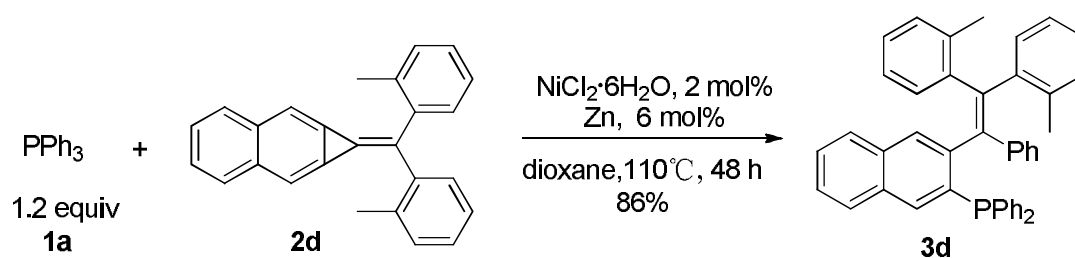

The reaction of  $\text{NiCl}_2 \cdot 6\text{H}_2\text{O}$  (1 mg, 0.004 mmol), Zn (1 mg, 0.012 mmol),  $\text{PPh}_3$  (**1a**, 63 mg 0.24 mmol) and **2d** (66 mg, 0.2 mmol) in dioxane (1 mL) afforded **3d** (102 mg, 86%) as a white solid (eluent: petroleum ether/ $\text{CH}_2\text{Cl}_2$  = 10:1): m.p.  $132\text{--}134^\circ\text{C}$  (petroleum ether/ $\text{CH}_2\text{Cl}_2$ );  $^1\text{H}$  NMR (400 MHz,  $\text{DMSO-D}_6$ ,  $80^\circ\text{C}$ ):  $\delta$  = 7.79–7.73 (m, 2H), 7.63–7.57 (m, 2H), 7.46–7.33 (m, 6H), 7.20–6.99 (m, 9H), 6.93–6.88 (m, 4H), 6.82–6.75 (m, 6H), 2.18 (s, 3H), 2.10 (s, 3H) ppm;  $^{31}\text{P}$  NMR (162 MHz,  $\text{DMSO-D}_6$ ,  $80^\circ\text{C}$ ):  $\delta$  = -13.94 ppm;  $^{13}\text{C}$  NMR (100 MHz,  $\text{DMSO-D}_6$ ,  $80^\circ\text{C}$ ):  $\delta$  = 145.3 (d,  $J$  = 33.4 Hz), 142.3, 141.4, 140.3, 138.2, 138.1, 136.2, 136.1, 135.9, 135.8, 135.0, 134.8, 132.7, 132.5, 132.3, 132.1, 131.3 (broad peak, 2C), 131.0, 130.3, 129.7 (broad peak, 2C), 129.3, 127.9 (d,  $J$  = 4.6 Hz), 127.7, 127.5 (d,  $J$  = 6.1 Hz), 127.4, 127.0 (d,  $J$  = 14.4 Hz), 126.6, 126.4, 126.3, 126.1, 125.7, 125.6, 124.6, 124.2, 19.8, 19.7 ppm; MS(EI):  $m/z$  (%) = 594 ( $M^+$ , 20.0), 57 (100); IR (neat): 2984, 1651, 1558, 1540, 1513, 1490, 1456, 1436, 1396, 1338, 1273, 1196, 1114, 1046  $\text{cm}^{-1}$ ; HRMS calcd. for  $\text{C}_{44}\text{H}_{36}\text{P}$  ( $(M+1)^+$ ): 595.2549; found: 595.2561; anal. calcd. for  $\text{C}_{44}\text{H}_{35}\text{P}$ : C 88.86, H 5.93; found: C 88.98, H 6.044.

(5) {3-[2,2-Bis(4-methoxyphenyl)-1-phenylvinyl]naphthalen-2-yl}diphenylphosphine

(3e)

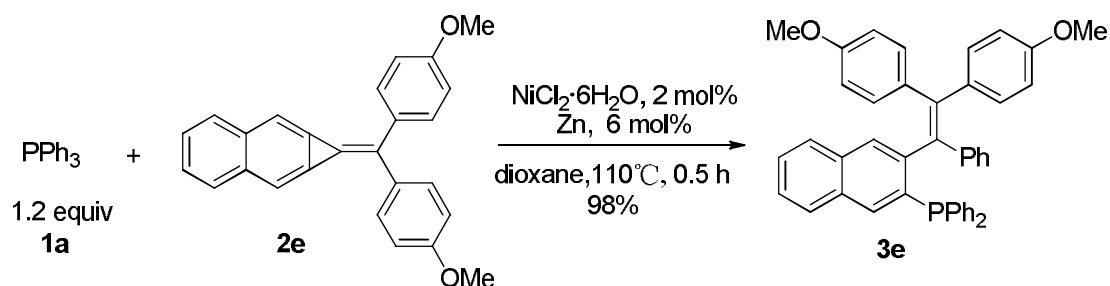

The reaction of  $\text{NiCl}_2 \cdot 6\text{H}_2\text{O}$  (1 mg, 0.004 mmol),  $\text{Zn}$  (1 mg, 0.012 mmol),  $\text{PPh}_3$  (**1a**, 63 mg 0.24 mmol) and **2e** (73 mg, 0.2 mmol) in dioxane (1 mL) afforded **3e** (123 mg, 98%) as a white solid (eluent: petroleum ether/ $\text{CH}_2\text{Cl}_2$  = 5:1): m.p.  $215\text{--}217^\circ\text{C}$  (petroleum ether/ $\text{CH}_2\text{Cl}_2$ );  $^1\text{H}$  NMR (400 MHz,  $\text{CDCl}_3$ ,  $25^\circ\text{C}$ ):  $\delta$  = 7.68–7.61 (m, 2H), 7.56 (d,  $J$  = 6.0 Hz, 2H), 7.40–7.28 (m, 2H), 7.24–7.00 (m, 12H), 6.93–6.86 (m, 2H), 6.83–6.79 (m, 5H), 6.68 (d,  $J$  = 8.8 Hz, 2H), 6.46 (d,  $J$  = 8.8 Hz, 2H), 3.71 (s, 3H), 3.63 (s, 3H) ppm;  $^{31}\text{P}$  NMR (162 MHz,  $\text{CDCl}_3$ ,  $25^\circ\text{C}$ ):  $\delta$  = -13.69 ppm;  $^{13}\text{C}$  NMR (100 MHz,  $\text{CDCl}_3$ ,  $25^\circ\text{C}$ ):  $\delta$  = 158.2, 157.9, 147 (d,  $J$  = 32.2 Hz), 141.7 (d,  $J$  = 1.2 Hz), 143.6, 139.0 (d,  $J$  = 13.6 Hz), 138.6 (d,  $J$  = 4.7 Hz), 137.5 (d,  $J$  = 14.2 Hz), 136.7 (d,  $J$  = 2.3 Hz), 136.4, 136.3, 136.2 (d,  $J$  = 13.0 Hz), 134.0 (d,  $J$  = 20.8 Hz), 133.6, 133.0, 132.8 (d,  $J$  = 15.0 Hz), 132.8, 132.2, 131.5, 130.9 (d,  $J$  = 6.4 Hz), 128.1, 128.13, 128.09, 128.07, 128.05, 127.9, 127.6 (d,  $J$  = 10.2 Hz), 127.2, 126.2, 125.6 (d,  $J$  = 13.9 Hz), 113.1, 112.7, 55.05, 54.96 ppm; MS(EI):  $m/z$  (%) = 626 ( $\text{M}^+$ , 59.0), 549 (100); IR (neat): 3051, 1603, 1576, 1506, 1483, 1461, 1437, 1244, 1175, 1109, 1033  $\text{cm}^{-1}$ ; HRMS calcd. for  $\text{C}_{44}\text{H}_{36}\text{O}_2\text{P}$  ( $(\text{M}+1)^+$ ): 627.2447; found: 627.2453.

(6) {3-[2,2-Bis(3,5-dimethoxyphenyl)-1-phenylvinyl]naphthalen-2-yl}diphenylphosphine



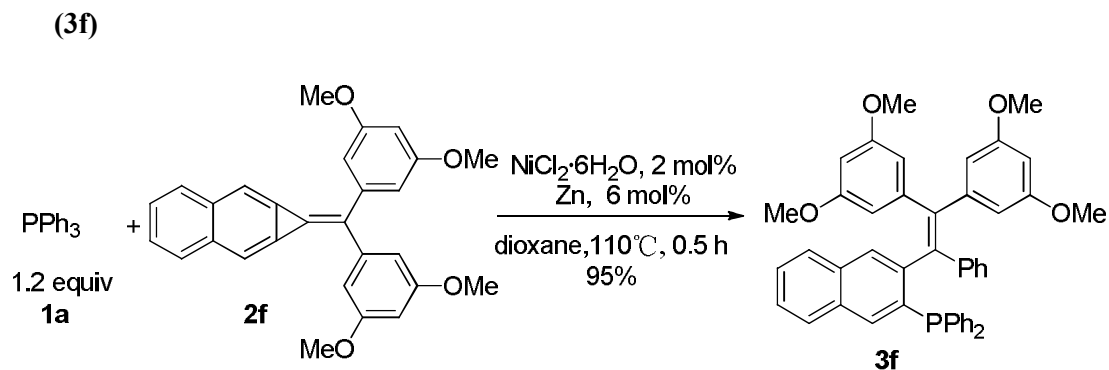

The reaction of  $\text{NiCl}_2 \cdot 6\text{H}_2\text{O}$  (1 mg, 0.004 mmol),  $\text{Zn}$  (1 mg, 0.012 mmol),  $\text{PPh}_3$  (**1a**, 63 mg 0.24 mmol) and **2f** (85 mg, 0.2 mmol) in dioxane (1 mL) afforded **3b** (130 mg, 96%) as a white solid (eluent: petroleum ether/ $\text{CH}_2\text{Cl}_2$  = 3:1): m.p.  $198\text{--}200^\circ\text{C}$  (petroleum ether/ $\text{CH}_2\text{Cl}_2$ );  $^1\text{H}$  NMR (400 MHz,  $\text{CDCl}_3$ ,  $25^\circ\text{C}$ ):  $\delta$  = 7.72–7.64 (m, 2H), 7.60–7.54 (m, 2H), 7.44–7.30 (m, 2H), 7.25–7.18 (m, 4H), 7.18–7.08 (m, 4H), 6.99–6.92 (m, 2H), 6.83–6.75 (m, 5H), 6.39–6.33 (m, 4H), 6.25 (s, 1H), 6.11 (s, 1H), 3.57 (s, 6H), 3.36 (s, 6H) ppm;  $^{31}\text{P}$  NMR (162 MHz,  $\text{CDCl}_3$ ,  $25^\circ\text{C}$ ):  $\delta$  = -13.85 ppm;  $^{13}\text{C}$  NMR (100 MHz,  $\text{CDCl}_3$ ,  $25^\circ\text{C}$ ):  $\delta$  = 160.0, 159.6, 146.3 (d,  $J$  = 31.5 Hz), 145.0 (d,  $J$  = 10.7 Hz), 142.8, 142.1, 140.5 (d,  $J$  = 3.7 Hz), 138.9 (d,  $J$  = 14.0 Hz), 137.1 (d,  $J$  = 13.5 Hz), 136.5, 136.0 (d,  $J$  = 13.6 Hz), 134.1 (d,  $J$  = 21.6 Hz), 133.4, 132.9 (d,  $J$  = 18.2 Hz), 132.2, 131.2, 130.4 (d,  $J$  = 5.8 Hz), 128.4, 128.12, 128.07, 128.0, 127.9, 127.7, 127.4, 127.2, 126.8, 126.2, 125.7, 109.7, 109.6, 99.5, 99.3, 55.2, 55.0 ppm; MS(EI):  $m/z$  (%) = 686 ( $\text{M}^+$ , 40.0), 549 (100); IR (neat): 3052, 2999, 1589, 1456, 1422, 1344, 1267, 1201, 1152, 1118,  $1065\text{cm}^{-1}$ ; HRMS calcd. for  $\text{C}_{46}\text{H}_{40}\text{O}_4\text{P}$  ( $(\text{M}+1)^+$ ): 687.2659; found: 687.2669.

(7) {3-[2,2-Bis(4-fluorophenyl)-1-phenylvinyl]naphthalen-2-yl}diphenylphosphine (**3g**)

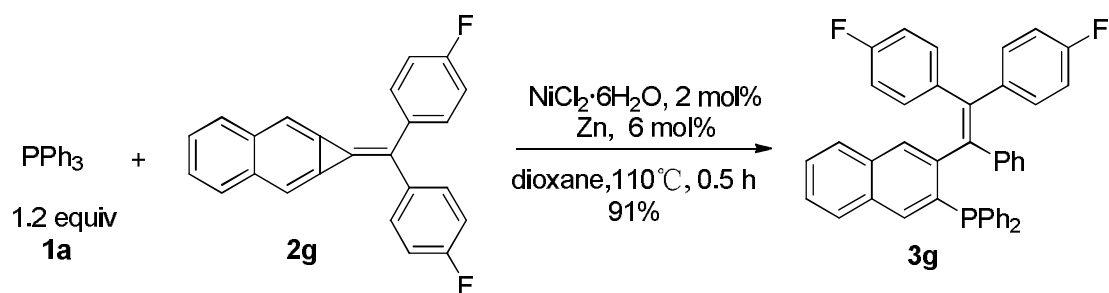

The reaction of  $\text{NiCl}_2 \cdot 6\text{H}_2\text{O}$  (1 mg, 0.004 mmol), Zn (1 mg, 0.012 mmol),  $\text{PPh}_3$  (**1a**, 63 mg 0.24 mmol) and **2g** (68 mg, 0.2 mmol) in dioxane (1 mL) afforded **3g** (110 mg, 91%) as a white solid (eluent: petroleum ether/ $\text{CH}_2\text{Cl}_2$  = 10:1): m.p.  $230\text{--}232^\circ\text{C}$  (petroleum ether/ $\text{CH}_2\text{Cl}_2$ );  $^1\text{H}$  NMR (400 MHz,  $\text{CDCl}_3$ ,  $25^\circ\text{C}$ ):  $\delta$  = 7.67–7.63 (m, 2H), 7.59–7.54 (m, 2H), 7.41–7.28 (m, 2H), 7.25–7.03 (m, 12H), 6.96–6.90 (m, 2H), 6.86–6.78 (m, 7H), 6.64–6.56 (m, 2H) ppm;  $^{31}\text{P}$  NMR (162 MHz,  $\text{CDCl}_3$ ,  $25^\circ\text{C}$ ):  $\delta$  = -13.76 ppm;  $^{13}\text{C}$  NMR (100 MHz,  $\text{CDCl}_3$ ,  $25^\circ\text{C}$ ):  $\delta$  = 161.6 (d,  $J_{\text{C-F}}$  = 246.0 Hz), 163.3 (d,  $J_{\text{C-F}}$  = 243.6 Hz), 146.2 (d,  $J$  = 32.6 Hz), 142.7, 140.8, 140.2, 139.5, 139.4 (d,  $J$  = 11.4 Hz), 138.4 (d,  $J$  = 14.3 Hz), 136.9, 135.7 (d,  $J$  = 13.8 Hz), 133.9 (d,  $J$  = 20.8 Hz), 133.5, 133.0 (broad peak, 2C), 132.9, 132.3, 131.4, 130.9 (d,  $J$  = 6.5 Hz), 128.4 (d,  $J$  = 10.4 Hz), 128.3, 128.23, 128.16, 127.95, 127.92, 127.5, 127.4, 126.9, 126.3, 125.9, 114.8 (d,  $J_{\text{C-F}}$  = 21.2 Hz), 114.4 (d,  $J_{\text{C-F}}$  = 21.2 Hz) ppm; MS(EI):  $m/z$  (%) = 602 ( $\text{M}^+$ , 45.0), 507 (100); IR (neat): 3058, 2986, 1602, 1558, 1540, 1509, 1456, 1437, 1395, 1339, 1262, 1226, 1198, 1159, 1117  $\text{cm}^{-1}$ ; HRMS calcd. for  $\text{C}_{42}\text{H}_{30}\text{F}_2\text{P}$  ( $(\text{M}+1)^+$ ): 603.2048; found: 603.2060.

(8) {3-[2,2-Bis(4-chlorophenyl)-1-phenylvinyl]naphthalen-2-yl}diphenylphosphine (**3h**)

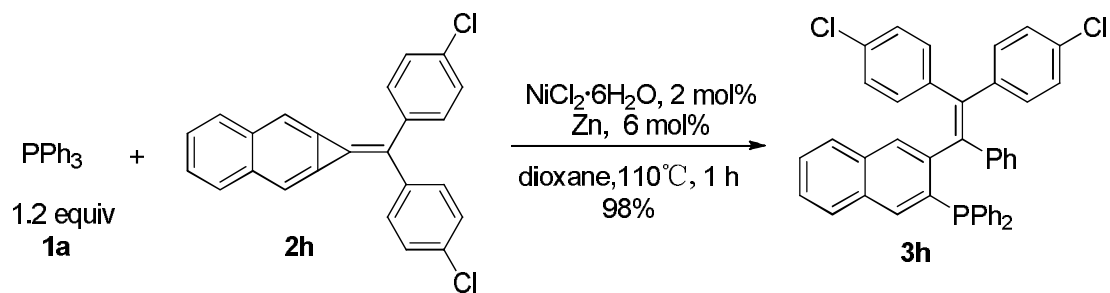

The reaction of  $\text{NiCl}_2 \cdot 6\text{H}_2\text{O}$  (1 mg, 0.004 mmol), Zn (1 mg, 0.012 mmol),  $\text{PPh}_3$  (**1a**, 63 mg, 0.24 mmol) and **2h** (75 mg, 0.2 mmol) in dioxane (1 mL) afforded **3h** (124 mg, 98%) as a white solid (eluent: petroleum ether/ $\text{CH}_2\text{Cl}_2$  = 10:1): m.p.  $249\text{--}251^\circ\text{C}$  (petroleum ether/ $\text{CH}_2\text{Cl}_2$ );  $^1\text{H}$  NMR (400 MHz,  $\text{CDCl}_3$ ,  $25^\circ\text{C}$ ):  $\delta$  = 7.70–7.55 (m, 4H), 7.46–7.30 (m, 2H), 7.25–7.06 (m, 12H), 7.02–6.96 (m, 2H), 6.91–6.80 (m, 9H) ppm;  $^{31}\text{P}$  NMR (162 MHz,  $\text{CDCl}_3$ ,  $25^\circ\text{C}$ ):  $\delta$  = -13.90 ppm;  $^{13}\text{C}$  NMR (100 MHz,  $\text{CDCl}_3$ ,  $25^\circ\text{C}$ ):  $\delta$  = 145.9 (d,  $J$  = 22.6 Hz), 142.4, 141.8, 141.6 (broad peak, 2C), 139.8, 138.1 (d,  $J$  = 13.1 Hz), 137.1 (d,  $J$  = 12.5 Hz), 135.5 (d,  $J$  = 13.7 Hz), 133.9 (d,  $J$  = 20.9 Hz), 133.7 (d,  $J$  = 19.2 Hz), 133.4, 132.9 (d,  $J$  = 14.2 Hz), 132.8 (broad peak, 2C), 132.7, 132.6, 132.3, 131.4, 130.8 (d,  $J$  = 5.5 Hz), 128.6 (d,  $J$  = 18.9 Hz), 128.4 (d,  $J$  = 10.3 Hz), 128.3 (d,  $J$  = 4.1 Hz), 128.16, 128.12, 127.9 (d,  $J$  = 6.1 Hz), 127.7, 127.53, 127.48, 126.97, 126.5, 126.0 ppm; MS(EI):  $m/z$  (%) = 634 ( $\text{M}^+$  ( $^{35,35}\text{Cl}$ ), 36.0), 636 ( $\text{M}^+$  ( $^{35,37}\text{Cl}$ ), 27.0), 638 ( $\text{M}^+$  ( $^{37,37}\text{Cl}$ ), 4.0), 523 (100); IR (neat): 3053, 1585, 1541, 1488, 1436, 1397, 1266, 1197, 1090, 1016  $\text{cm}^{-1}$ ; HRMS calcd. for  $\text{C}_{42}\text{H}_{30}^{35,35}\text{Cl}_2\text{P}$  ( $(\text{M}+1)^+$ ): 635.1457; found: 635.1446.

(9) {3-[2,2-Bis(4-bromophenyl)-1-phenylvinyl]naphthalen-2-yl}diphenylphosphine (**3i**)

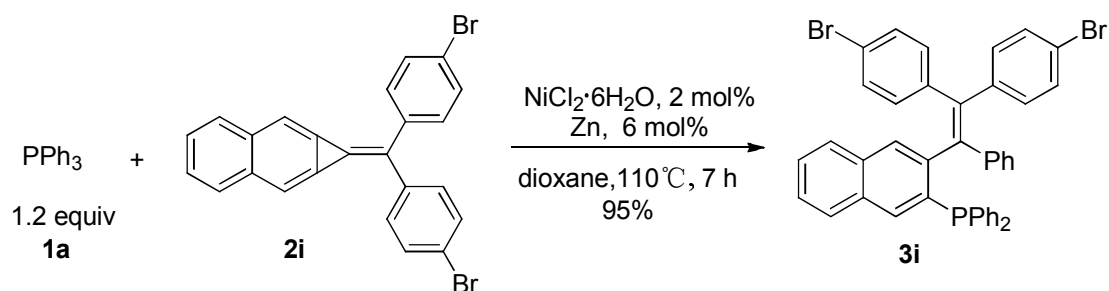

The reaction of  $\text{NiCl}_2 \cdot 6\text{H}_2\text{O}$  (1 mg, 0.004 mmol), Zn (1 mg, 0.012 mmol),  $\text{PPh}_3$  (**1a**, 63 mg 0.24 mmol) and **2i** (92 mg, 0.2 mmol) in dioxane (1 mL) afforded **3i** (138 mg, 95%) as a white solid (eluent: petroleum ether/ $\text{CH}_2\text{Cl}_2$  = 10:1): m.p.  $192\text{--}194^\circ\text{C}$  (petroleum ether/ $\text{CH}_2\text{Cl}_2$ );  $^1\text{H}$  NMR (400 MHz,  $\text{CDCl}_3$ ,  $25^\circ\text{C}$ ):  $\delta$  = 7.68 (d,  $J$  = 8.0 Hz, 1H), 7.63 (d,  $J$  = 4.0 Hz, 1H), 7.7.60 (d,  $J$  = 8.4 Hz, 1H), 7.57 (d,  $J$  = 4.0 Hz, 1H), 7.44–7.36 (m, 2H), 7.30–7.14 (m, 8H), 7.11–7.06 (m, 2H), 7.05–6.99 (m, 4H), 6.94–6.79 (m, 9H) ppm;  $^{31}\text{P}$  NMR (162 MHz,  $\text{CDCl}_3$ ,  $25^\circ\text{C}$ ):  $\delta$  = -13.85 ppm;  $^{13}\text{C}$  NMR (100 MHz,  $\text{CDCl}_3$ ,  $25^\circ\text{C}$ ):  $\delta$  = 145.9 (d,  $J$  = 31.8 Hz), 142.4, 142.2, 141.9, 141.5 (d,  $J$  = 5.3 Hz), 139.9, 138.1 (d,  $J$  = 12.3 Hz), 137.1, 137.0 (broad peak, 2C), 135.4 (d,  $J$  = 13.7 Hz), 133.9 (d,  $J$  = 20.2 Hz), 133.4, 133.2, 133.1, 132.8 (d,  $J$  = 18.4 Hz), 132.4, 131.3, 131.1, 130.8 (d,  $J$  = 5.5 Hz), 130.6, 128.4 (d,  $J$  = 9.1 Hz), 128.3, 128.2 (d,  $J$  = 6.7 Hz), 127.9 (d,  $J$  = 7.8 Hz), 127.54, 127.49, 127.0, 126.4, 126.0, 120.9, 120.7 ppm; MS(EI):  $m/z$  (%) = 722 ( $\text{M}^+(\text{}^{79,79}\text{Br})$ , 14.0), 724 ( $\text{M}^+(\text{}^{79,81}\text{Br})$ , 29.0), 726 ( $\text{M}^+(\text{}^{81,81}\text{Br})$ , 15.0), 57 (100); IR (neat): 3053, 1541, 1512, 1486, 1435, 1394, 1339, 1266, 1195, 1071, 1011  $\text{cm}^{-1}$ ; HRMS calcd. for  $\text{C}_{42}\text{H}_{30}^{79,79}\text{Br}_2\text{P}$  ( $(\text{M}+1)^+$ ): 723.0446; found: 723.0452.

(10) {3-[(9H-fluoren-9-ylidene)(phenyl)methyl]naphthalen-2-yl}diphenylphosphine (**3j**)

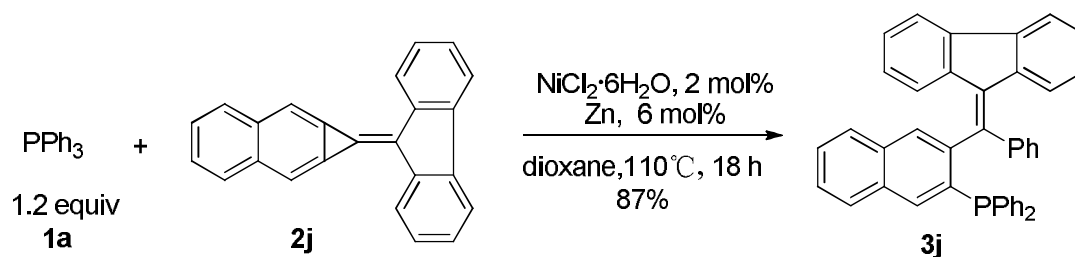

The reaction of  $\text{NiCl}_2 \cdot 6\text{H}_2\text{O}$  (1 mg, 0.004 mmol), Zn (1 mg, 0.012 mmol),  $\text{PPh}_3$  (**1a**, 63 mg 0.24 mmol) and **2j** (60 mg, 0.2 mmol) in dioxane (1 mL) afforded **3j** (98 mg, 87%) as a white solid (eluent: petroleum ether/ $\text{CH}_2\text{Cl}_2$  = 10:1): m.p. 161-163 °C (petroleum ether/ $\text{CH}_2\text{Cl}_2$ );  $^1\text{H}$  NMR (400 MHz,  $\text{CDCl}_3$ , 25 °C):  $\delta$  = 7.89 (d,  $J$  = 4.0Hz, 1H), 7.78 (d,  $J$  = 7.8Hz, 1H), 7.73 (d,  $J$  = 4.0Hz, 1H), 7.71-7.63 (m, 3H), 7.49-7.42 (m, 3H), 7.28 (d,  $J$  = 8.0Hz, 1H), 7.25-7.05 (m, 12H), 7.01-6.88 (m, 4H), 6.85 (d,  $J$  = 8.0Hz, 1H), 6.75-6.71 (m, 1H), 6.26 (d,  $J$  = 8.0Hz, 1H) ppm;  $^{31}\text{P}$  NMR (162 MHz,  $\text{CDCl}_3$ , 25 °C):  $\delta$  = -13.64 ppm;  $^{13}\text{C}$  NMR (100 MHz,  $\text{CDCl}_3$ , 25 °C):  $\delta$  = 145.7 (d,  $J$  = 33.7Hz), 144.59, 144.55, 141.4, 140.8, 140.4, 139.2, 138.5, 137.6 (d,  $J$  = 13.3Hz), 136.9 (d,  $J$  = 2.0Hz), 136.7 (d,  $J$  = 11.5Hz), 135.7 (d,  $J$  = 3.1Hz), 135.5 (d,  $J$  = 14.6Hz), 133.9, 133.8 (d,  $J$  = 20.1Hz), 133.4 (d,  $J$  = 18.9Hz), 132.9, 131.9, 131.8, 129.6, 128.4, 128.4, 128.3, 128.2, 128.1, 128.03, 127.96, 127.9 (d,  $J$  = 4.1Hz), 127.7, 127.5, 127.1, 126.5, 126.4 (d,  $J$  = 8.6Hz), 125.1 (d,  $J$  = 10.7Hz), 119.2, 119.1 ppm; MS(EI):  $m/z$  (%) = 564 ( $\text{M}^+$ , 14.0), 487 (100); IR (neat): 3056, 1541, 1513, 1489, 1440, 1273, 1195, 1118  $\text{cm}^{-1}$ ; HRMS calcd. for  $\text{C}_{42}\text{H}_{30}\text{P}$  ( $(\text{M}+1)^+$ ): 565.2080; found: 565.2066.

(11) (Z)-Diphenyl[3-(1-phenyl-2-(*p*-tolyl)vinyl)naphthalen-2-yl]phosphine (**3k**) and  
(E)-diphenyl[3-[1-phenyl-2-(*p*-tolyl)vinyl]naphthalen-2-yl]phosphine (**3k'**)

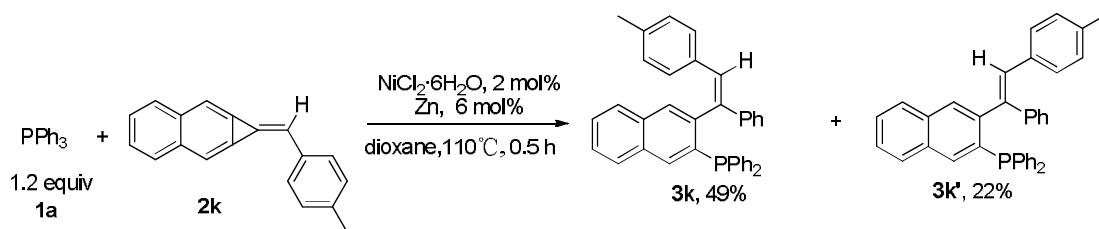

The reaction of  $\text{NiCl}_2 \cdot 6\text{H}_2\text{O}$  (1 mg, 0.004 mmol), Zn (1 mg, 0.012 mmol),  $\text{PPh}_3$  (**1a**, 63 mg, 0.24 mmol) and **2k** (48 mg, 0.2 mmol) in dioxane (1 mL) afforded **3k** (49 mg, 49%) and **3k'** (22 mg, 22%) as a white solid (eluent: petroleum ether/ $\text{CH}_2\text{Cl}_2$  = 10:1). **3k**: m.p. 150-152 °C (petroleum ether/ $\text{CH}_2\text{Cl}_2$ );  $^1\text{H}$  NMR (400 MHz,  $\text{CDCl}_3$ , 25 °C):  $\delta$  = 7.77-7.71 (m, 4H), 7.49-7.44 (m, 2H), 7.22-7.01 (m, 16H), 6.85-6.77 (m, 4H), 2.20 (s, 3H) ppm;  $^{31}\text{P}$  NMR (162 MHz,  $\text{CDCl}_3$ , 25 °C):  $\delta$  = -14.19 ppm;  $^{13}\text{C}$  NMR (100 MHz,  $\text{CDCl}_3$ , 25 °C):  $\delta$  = 143.0 (d,  $J$  = 33.2Hz), 142.8, 140.7 (d,  $J$  = 6.0Hz), 137.6 (d,  $J$  = 12.7Hz), 136.8 (d,  $J$  = 11.9Hz), 136.5 (broad peak, 2C), 136.2 (d,  $J$  = 14.6Hz), 134.5, 133.9, 133.8, 133.7, 133.6, 133.5, 132.7, 129.7, 129.6, 129.5, 128.7, 128.2, 128.1, 128.02, 127.96, 127.9, 127.8, 127.2, 126.9 (d,  $J$  = 11.8Hz), 126.0, 21.1 ppm; MS(EI):  $m/z$  (%) = 504 ( $\text{M}^+$ , 40.0), 314 (100); IR (neat): 3056, 3009, 1651, 1512, 1487, 1436, 1274, 1192, 1115  $\text{cm}^{-1}$ ; HRMS calcd. for  $\text{C}_{37}\text{H}_{30}\text{P}$  ( $(\text{M}+1)^+$ ): 505.2080; found: 505.2072.

**3k'**: m.p. 70-72 °C (petroleum ether/ $\text{CH}_2\text{Cl}_2$ );  $^1\text{H}$  NMR (400 MHz,  $\text{CDCl}_3$ , 25 °C):  $\delta$  = 7.77-7.71 (m, 2H), 7.58 (d,  $J$  = 8.0Hz, 1H), 7.48 (d,  $J$  = 4.0Hz, 1H), 7.43-7.35 (m, 2H), 7.30-7.23 (m, 10H), 7.20-7.15 (m, 2H), 7.12-7.09 (m, 3H), 6.90 (d,  $J$  = 8.0Hz, 2H), 6.77 (d,  $J$  = 8.0Hz, 2H), 6.33 (s, 1H), 2.24 (s, 3H) ppm;  $^{31}\text{P}$  NMR (162 MHz,  $\text{CDCl}_3$ , 25 °C):  $\delta$  = -12.07 ppm;  $^{13}\text{C}$  NMR (100 MHz,  $\text{CDCl}_3$ , 25 °C):  $\delta$  = 146.6 (d,  $J$  = 28.1Hz), 140.9 (d,  $J$  = 5.9Hz), 140.2, 137.5 (d,  $J$  = 12.3Hz), 136.4, 136.0, 135.8, 134.7, 134.2, 134.1, 134.0, 133.2, 132.7 (d,  $J$  = 4.4Hz), 132.3, 130.4, 130.4, 129.2, 129.1 (d,  $J$  = 4.7Hz), 128.5, 128.4, 128.3, 128.2,

127.84, 127.82, 127.5, 127.1, 126.7, 125.9, 21.2 ppm; MS(EI):  $m/z$  (%) = 504 ( $M^+$ , 18.0), 57 (100); IR (neat): 3050, 2922, 1578, 1510, 1483, 1436, 1310, 1270, 1186, 1094, 1024  $\text{cm}^{-1}$ ;  
HRMS calcd. for  $\text{C}_{37}\text{H}_{30}\text{P}$  ( $(M+1)^+$ ): 505.2080; found: 505.2073.

**(12) (E)-[3-(1,2-diphenylprop-1-en-1-yl)naphthalen-2-yl]diphenylphosphine (3I) and  
(Z)-[3-(1,2-diphenylprop-1-en-1-yl)naphthalen-2-yl]diphenylphosphine (3I')**

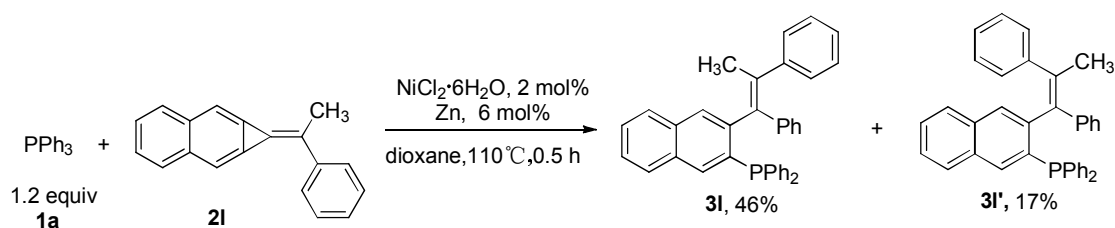

The reaction of  $\text{NiCl}_2 \cdot 6\text{H}_2\text{O}$  (1 mg, 0.004 mmol), Zn (1 mg, 0.012 mmol),  $\text{PPh}_3$  (1a, 63 mg 0.24 mmol) and 2I (48 mg, 0.2 mmol) in dioxane (1 mL) afforded 3I (46 mg, 46%) and 3I' (17 mg, 17%) as a white solid (eluent: petroleum ether/ $\text{CH}_2\text{Cl}_2$  = 10:1). 3I: m.p. 194-196 °C (petroleum ether/ $\text{CH}_2\text{Cl}_2$ );  $^1\text{H}$  NMR (400 MHz,  $\text{CDCl}_3$ , 25 °C):  $\delta$  = 7.84 (d,  $J$  = 8.0Hz, 1H), 7.80 (d,  $J$  = 7.6Hz, 1H), 7.66 (d,  $J$  = 8.4Hz, 1H), 7.61 (d,  $J$  = 4.0Hz, 1H), 7.51-7.45 (m, 1H), 7.44-7.38 (m, 3H), 7.36-7.33 (m, 3H), 7.22-7.06 (m, 10H), 6.95-6.85 (m, 5H), 1.60 (s, 3H) ppm;  $^{31}\text{P}$  NMR (162 MHz,  $\text{CDCl}_3$ , 25 °C):  $\delta$  = -13.22 ppm;  $^{13}\text{C}$  NMR (100 MHz,  $\text{CDCl}_3$ , 25 °C):  $\delta$  = 145.3 (d,  $J$  = 31.3Hz), 143.8, 141.2, 138.0 (d,  $J$  = 5.2Hz), 137.8, 137.3 (d,  $J$  = 12.5Hz), 137.0 (d,  $J$  = 12.9Hz), 136.5 (d,  $J$  = 13.9Hz), 135.0, 134.6 (d,  $J$  = 21.7Hz), 133.6, 133.5 (d,  $J$  = 19.2Hz), 132.3, 131.1 (d,  $J$  = 2.4Hz), 129.1, 128.84, 128.75 (broad peak, 2C), 128.4 (d,  $J$  = 6.9Hz), 128.2 (d,  $J$  = 6.5Hz), 128.0 (d,  $J$  = 12.3Hz), 127.8, 127.5, 126.9, 126.7, 126.2, 125.8, 125.6, 23.8 ppm; MS(EI):  $m/z$  (%) = 504 ( $M^+$ , 62.0), 489 (100); IR (neat): 3056, 3009, 1488, 1436, 1272, 1089, 1028 $\text{cm}^{-1}$ ; HRMS calcd. for  $\text{C}_{37}\text{H}_{30}\text{P}$

((M+1)<sup>+</sup>): 505.2080; found: 505.2080. anal. calcd. for C<sub>37</sub>H<sub>29</sub>P: C 88.07, H 5.79; found: C 88.24, H 5.801.

**31'**: m.p. 160-162 °C (petroleum ether/CH<sub>2</sub>Cl<sub>2</sub>); <sup>1</sup>H NMR (400 MHz, CDCl<sub>3</sub>, 25 °C): δ = 7.65 (d, *J* = 8.0Hz, 1H), 7.58 (d, *J* = 8.4Hz, 1H), 7.51 (d, *J* = 8.0Hz, 1H), 7.43 (d, *J* = 8.0Hz, 1H), 7.39-7.34 (m, 1H), 7.33-7.22 (m, 6H), 7.20-7.11 (m, 3H), 7.10-6.94 (m, 10H), 6.91-6.86 (m, 2H) ppm; <sup>31</sup>P NMR (162 MHz, CDCl<sub>3</sub>, 25 °C): δ = -14.09 ppm; <sup>13</sup>C NMR (100 MHz, CDCl<sub>3</sub>, 25 °C): δ = 146.2 (d, *J* = 33.8Hz), 144.3, 142.0, 139.2 (d, *J* = 15.2Hz), 138.8 (d, *J* = 13.6Hz), 137.1, 137.0, 136.8, 135.6 (d, *J* = 13.1Hz), 133.5, 133.3, 133.3 (d, *J* = 6.6Hz), 133.0, 132.0, 130.8, 130.7, 130.6 (d, *J* = 6.8Hz), 129.1, 128.2 (d, *J* = 5.5Hz), 127.9, 127.8, 127.8 (d, *J* = 4.1Hz), 127.6, 127.4, 126.6, 126.2, 126.0, 125.5, 23.0ppm; MS(EI): *m/z* (%) = 504 (M<sup>+</sup>, 2.0), 85 (100); IR (neat): 3055, 2926, 1578, 1489, 1437, 1378, 1274, 1187, 1116, 1028 cm<sup>-1</sup>; HRMS calcd. for C<sub>37</sub>H<sub>30</sub>P ((M+1)<sup>+</sup>): 505.2080; found: 505.2088.

**(13) 3-[2,2-Diphenyl-1-(*m*-tolyl)vinyl]naphthalen-2-yl]di-*m*-tolylphosphine (**3m**)**

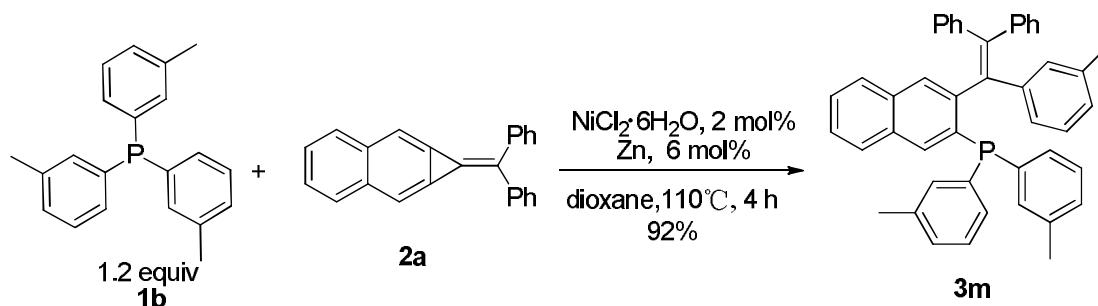

The reaction of NiCl<sub>2</sub>·6H<sub>2</sub>O (1 mg, 0.004 mmol), Zn (1 mg, 0.012 mmol), **1b** (73 mg, 0.24 mmol) and **2a** (61 mg, 0.2 mmol) in dioxane (1 mL) afforded **3m** (112 mg, 92%) as a white solid (eluent: petroleum ether/CH<sub>2</sub>Cl<sub>2</sub> = 10:1): m.p. 130-132 °C (petroleum



ether/CH<sub>2</sub>Cl<sub>2</sub>); <sup>1</sup>H NMR (400 MHz, CDCl<sub>3</sub>, 25 °C): δ = 7.69-7.63 (m, 2H), 7.60 (d, *J* = 8.0Hz, 1H), 7.56 (d, *J* = 4.0Hz, 1H), 7.41-7.33 (m, 2H), 7.19-7.09 (m, 8H), 7.09-7.01 (m, 3H), 6.96-6.93 (m, 4H), 6.87 (d, *J* = 8.8Hz, 1H), 6.72-6.68 (m, 4H), 6.62-6.58 (m, 1H), 6.48 (s, 1H), 2.23 (s, 3H), 2.19 (s, 3H), 1.85 (s, 3H) ppm; <sup>31</sup>P NMR (162 MHz, CDCl<sub>3</sub>, 25 °C): δ = -13.67 ppm; <sup>13</sup>C NMR (100 MHz, CDCl<sub>3</sub>, 25 °C): δ = 146.7 (d, *J* = 31.9Hz), 143.9, 143.8, 142.7, 141.9, 140.6 (d, *J* = 15.4Hz), 139.1 (d, *J* = 13.0Hz), 137.5 (d, *J* = 6.0Hz), 137.3 (d, *J* = 8.6Hz), 136.7, 136.6 (d, *J* = 11.5Hz), 136.4 (d, *J* = 14.1Hz), 135.1, 134.8, 133.5 (d, *J* = 9.6Hz), 133.3, 132.2, 131.5 (broad peak, 3C), 131.0 (d, *J* = 17.8Hz), 130.7 (d, *J* = 5.9Hz), 129.8 (d, *J* = 16.3Hz), 129.2, 128.9, 128.4, 128.0 (broad peak, 2C), 127.8 (d, *J* = 7.3Hz), 127.62, 127.55, 127.3, 126.80, 126.76, 126.5, 126.4, 126.2, 125.5, 21.5, 21.4, 21.1 ppm; MS(EI): *m/z* (%) = 608 (M<sup>+</sup>, 10.0), 43 (100); IR (neat): 3050, 3023, 1594, 1489, 1269, 1190, 1108, 1034cm<sup>-1</sup>; HRMS calcd. for C<sub>45</sub>H<sub>38</sub>P ((M+1)<sup>+</sup>): 609.2706; found: 609.2718.

**(14) {3-[2,2-Diphenyl-1-(*p*-tolyl)vinyl]naphthalen-2-yl}di-*p*-tolylphosphine (3n)**

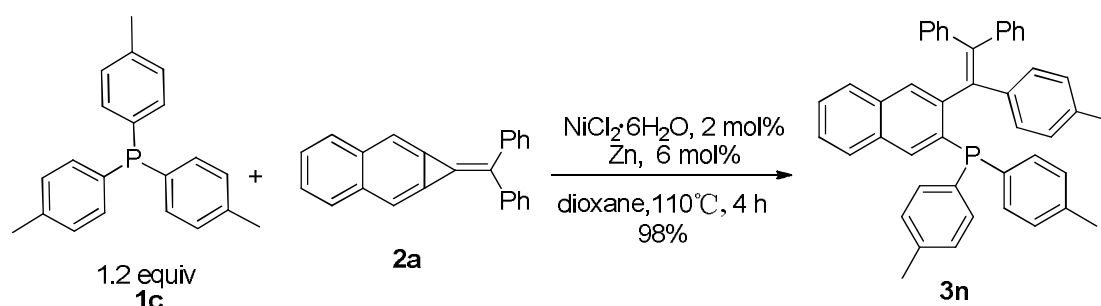

The reaction of NiCl<sub>2</sub>·6H<sub>2</sub>O (1 mg, 0.004 mmol), Zn (1 mg, 0.012 mmol), **1c** (73 mg 0.24 mmol) and **2a** (61 mg, 0.2 mmol) in dioxane (1 mL) afforded **3n** (119 mg, 98%) as a white solid (eluent: petroleum ether/CH<sub>2</sub>Cl<sub>2</sub> = 10:1): m.p. 223-225 °C (petroleum ether/CH<sub>2</sub>Cl<sub>2</sub>); <sup>1</sup>H NMR (400 MHz, CDCl<sub>3</sub>, 25 °C): δ = 7.66-7.61 (m, 2H), 7.58-7.52 (m, 2H),

7.36-7.29 (m, 2H), 7.19-7.10 (m, 7H), 7.04 (d,  $J = 7.2\text{Hz}$ , 2H), 6.97-6.91 (m, 7H), 6.88-6.81 (m, 2H), 6.66 (d,  $J = 8.0\text{Hz}$ , 2H), 6.54 (d,  $J = 8.0\text{Hz}$ , 2H), 2.31 (s, 3H), 2.28 (s, 3H), 2.04 (s, 3H) ppm;  $^{31}\text{P}$  NMR (162 MHz,  $\text{CDCl}_3$ , 25 °C):  $\delta = -15.50$  ppm;  $^{13}\text{C}$  NMR (100 MHz,  $\text{CDCl}_3$ , 25 °C):  $\delta = 146.7$  (d,  $J = 32.0\text{Hz}$ ), 144.0 (d,  $J = 9.2\text{Hz}$ ), 141.4, 140.6 (d,  $J = 5.7\text{Hz}$ ), 139.8, 137.9, 137.4, 136.7 (d,  $J = 13.9\text{Hz}$ ), 136.4 (broad peak, 2C), 135.7, 135.6, 134.1 (d,  $J = 20.9\text{Hz}$ ), 133.4, 133.2, 133.0 (d,  $J = 18.9\text{Hz}$ ), 132.2, 131.6, 131.5, 131.3 (d,  $J = 2.5\text{Hz}$ ), 130.7 (d,  $J = 7.0\text{Hz}$ ), 129.0 (d,  $J = 5.5\text{Hz}$ ), 128.7 (d,  $J = 7.7\text{Hz}$ ), 127.9, 127.8, 127.7, 127.5, 127.3, 126.5, 126.4, 126.1, 125.5, 21.26, 21.23, 21.0 ppm; MS(ED):  $m/z$  (%) = 608 ( $\text{M}^+$ , 40.0), 531 (100); IR (neat): 3020, 1651, 1599, 1492, 1443, 1397, 1272, 1187, 1115, 1023  $\text{cm}^{-1}$ ; HRMS calcd. for  $\text{C}_{45}\text{H}_{38}\text{P}$  ( $(\text{M}+1)^+$ ): 609.2706; found: 609.2694.

**(15) Bis(4-methoxyphenyl){3-[1-(4-methoxyphenyl)-2,2-diphenylvinyl]naphthalen-2-yl}phosphine (3o)**

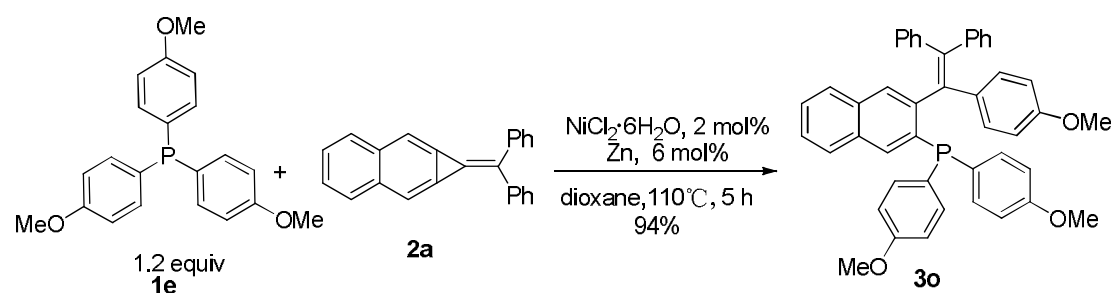

The reaction of  $\text{NiCl}_2 \cdot 6\text{H}_2\text{O}$  (1 mg, 0.004 mmol), Zn (1 mg, 0.012 mmol), **1e** (84 mg, 0.24 mmol) and **2a** (61 mg, 0.2 mmol) in dioxane (1 mL) afforded **3m** (121 mg, 92%) as a white solid (eluent: petroleum ether/ $\text{CH}_2\text{Cl}_2 = 10:1$ ): m.p. 166-168 °C (petroleum ether/ $\text{CH}_2\text{Cl}_2$ );  $^1\text{H}$  NMR (400 MHz,  $\text{CDCl}_3$ , 25 °C):  $\delta = 7.65$ -7.55 (m, 3H), 7.50 (d,  $J = 4.0\text{Hz}$ , 1H), 7.37-7.31 (m, 2H), 7.21-7.12 (m, 7H), 7.01-6.88 (m, 7H), 6.81 (d,  $J = 8.8\text{Hz}$ , 2H), 6.67

(d,  $J = 8.4\text{Hz}$ , 4H), 6.25 (d,  $J = 8.0\text{Hz}$ , 2H), 3.77 (s, 3H), 3.73 (s, 3H), 3.55 (s, 3H) ppm;  $^{31}\text{P}$  NMR (162 MHz,  $\text{CDCl}_3$ , 25 °C):  $\delta = -16.75$  ppm;  $^{13}\text{C}$  NMR (100 MHz,  $\text{CDCl}_3$ , 25 °C):  $\delta = 159.7$ , 159.5, 157.6, 146.4 (d,  $J = 31.3\text{Hz}$ ), 144.0 (d,  $J = 16.4\text{Hz}$ ), 140.8, 140.3 (d,  $J = 5.3\text{Hz}$ ), 137.3 (d,  $J = 13.7\text{Hz}$ ), 136.0, 135.5 (d,  $J = 12.9\text{Hz}$ ), 135.00, 134.99, 134.3 (d,  $J = 19.6\text{Hz}$ ), 133.3, 132.9, 132.2, 131.5, 131.2 (d,  $J = 2.0\text{Hz}$ ), 130.7 (d,  $J = 5.9\text{Hz}$ ), 130.0 (d,  $J = 9.9\text{Hz}$ ), 127.8, 127.7, 127.44, 127.39, 127.3, 126.5, 126.3, 126.0, 125.6, 114.0 (d,  $J = 5.8\text{Hz}$ ), 113.5 (d,  $J = 8.7\text{Hz}$ ), 112.5, 55.1, 55.0, 54.7 ppm; MS(EI):  $m/z$  (%) = 656 ( $\text{M}^+$ , 41.0), 579 (100); IR (neat): 3007, 2836, 1652, 1596, 1504, 1458, 1256, 1178, 1116, 1029  $\text{cm}^{-1}$ ; HRMS calcd. for  $\text{C}_{45}\text{H}_{38}\text{O}_3\text{P}$  ( $(\text{M}+1)^+$ ): 657.2553; found: 657.2566.

**(16) Bis(4-fluorophenyl){3-[1-(4-fluorophenyl)-2,2-diphenylvinyl]naphthalen-2-yl}phosphine (3p)**

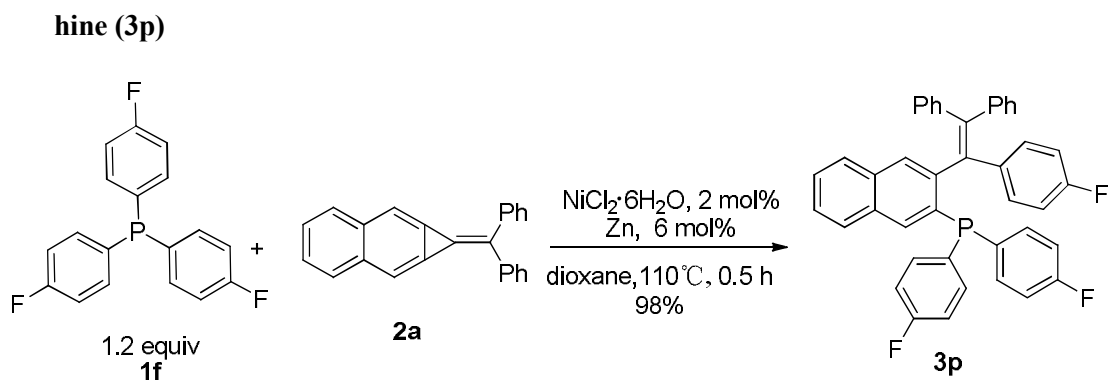

The reaction of  $\text{NiCl}_2 \cdot 6\text{H}_2\text{O}$  (1 mg, 0.004 mmol), Zn (1 mg, 0.012 mmol), **1f** (76 mg 0.24 mmol) and **2a** (61 mg, 0.2 mmol) in dioxane (1 mL) afforded **3p** (122 mg, 98%) as a white solid (eluent: petroleum ether/ $\text{CH}_2\text{Cl}_2 = 10:1$ ): m.p. 202-204 °C (petroleum ether/ $\text{CH}_2\text{Cl}_2$ );  $^1\text{H}$  NMR (400 MHz,  $\text{CDCl}_3$ , 25 °C):  $\delta = 7.68$ -7.63 (m, 2H), 7.59 (d,  $J = 8.4\text{Hz}$ , 1H), 7.46 (d,  $J = 8.0\text{Hz}$ , 1H), 7.42-7.21 (m, 2H), 7.19-7.10 (m, 7H), 7.06-6.83 (m, 11H), 6.77-6.71 (m, 2H), 6.49-6.40 (m, 2H) ppm;  $^{31}\text{P}$  NMR (162 MHz,  $\text{CDCl}_3$ , 25 °C):  $\delta = -16.08$  ppm;  $^{13}\text{C}$  NMR (100

MHz, CDCl<sub>3</sub>, 25 °C):  $\delta$  = 163.2 (d,  $J_{C-F}$  = 246.9Hz), 162.9 (d,  $J_{C-F}$  = 247.4Hz), 161.0 (d,  $J$  = 245.5Hz), 145.9 (d,  $J_{C-F}$  = 21.8Hz), 143.5, 143.3, 142.5, 139.2 (d,  $J_{C-F}$  = 6.1Hz), 138.5, 136.4 (broad peak, 2C), 135.8 (dd,  $J_{C-F}$  = 7.3Hz,  $J$  = 22.1Hz), 135.7 (dd,  $J_{C-F}$  = 8.2Hz,  $J$  = 19.8Hz), 133.9 (dd,  $J_{C-F}$  = 2.8Hz,  $J$  = 13.2Hz), 133.5, 133.2 (d,  $J_{C-F}$  = 7.6Hz), 132.2, 131.6 (dd,  $J_{C-F}$  = 3.3Hz,  $J$  = 12.8Hz), 131.4, 131.1 (broad peak, 2C), 127.9, 127.8, 127.5, 127.4, 127.0, 126.8, 126.4, 126.0, 115.6(dd,  $J_{C-F}$  = 21.2Hz,  $J$  = 6.4Hz), 115.3 (dd,  $J_{C-F}$  = 20.9Hz,  $J$  = 8.4Hz), 114.2 (d,  $J$  = 21.0Hz) ppm; MS(ED):  $m/z$  (%) = 656 (M<sup>+</sup>, 58.0), 543 (100); IR (neat): 3055, 1651, 1588, 1493, 1394, 1263, 1228, 1159, 1092, 1015 cm<sup>-1</sup>; HRMS calcd. for C<sub>42</sub>H<sub>29</sub>F<sub>3</sub>P ((M+1)<sup>+</sup>): 621.1954; found: 621.1939.

**(17) Bis(4-chlorophenyl){3-[1-(4-chlorophenyl)-2,2-diphenylvinyl]naphthalen-2-yl}phosphine (3q)**

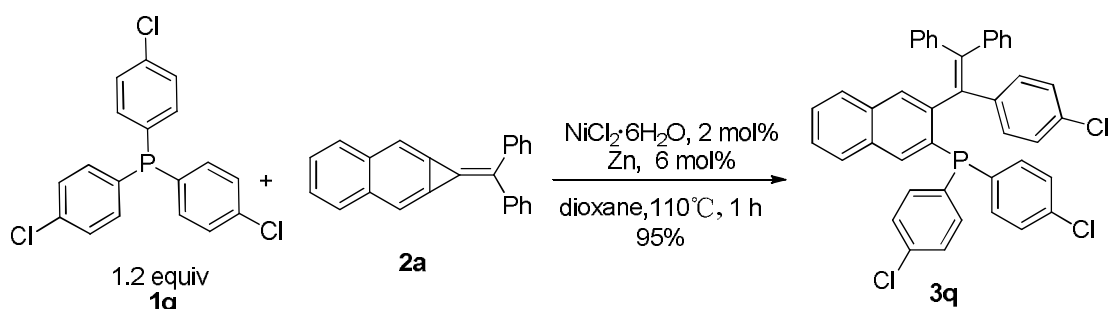

The reaction of NiCl<sub>2</sub>·6H<sub>2</sub>O (1 mg, 0.004 mmol), Zn (1 mg, 0.012 mmol), **1g** (88 mg 0.24 mmol) and **2a** (61 mg, 0.2 mmol) in dioxane (1 mL) afforded **3q** (127 mg, 95%) as a white solid (eluent: petroleum ether/CH<sub>2</sub>Cl<sub>2</sub> = 10:1): m.p. 218-220 °C (petroleum ether/CH<sub>2</sub>Cl<sub>2</sub>); <sup>1</sup>H NMR (400 MHz, CDCl<sub>3</sub>, 25 °C):  $\delta$  = 7.68-7.63 (m, 2H), 7.60 (d,  $J$  = 8.0Hz, 1H), 7.47 (d,  $J$  = 8.4Hz, 1H), 7.42-7.36 (m, 2H), 7.23 (d,  $J$  = 8.0Hz, 2H), 7.18-7.12 (m, 9H), 6.99-6.87 (m, 5H), 6.87-6.83 (m, 2H), 6.72-6.68 (m, 4H) ppm; <sup>31</sup>P NMR (162 MHz, CDCl<sub>3</sub>,

25 °C):  $\delta = -15.48$  ppm;  $^{13}\text{C}$  NMR (100 MHz,  $\text{CDCl}_3$ , 25 °C):  $\delta = 145.8$  (d,  $J = 33.4\text{Hz}$ ), 143.4, 143.0, 140.9, 139.1 (d,  $J = 4.8\text{Hz}$ ), 137.0 (d,  $J = 14.1\text{Hz}$ ), 136.7, 135.2, 135.14, 135.05, 135.0, 134.4, 134.2, 134.2, 134.0, 133.6, 132.9, 132.28, 132.25, 131.4, 131.2 (d,  $J = 6.9\text{Hz}$ ), 131.0, 128.6 (d,  $J = 6.2\text{Hz}$ ), 128.5 (d,  $J = 7.7\text{Hz}$ ), 128.0, 127.9, 127.5 (broad peak, 2C), 127.2, 126.9, 126.6, 126.1 ppm; MS(EI):  $m/z$  (%) = 668( $\text{M}^+(\text{}^{35,35,35}\text{Cl})$ , 40.0), 670 ( $\text{M}^+(\text{}^{35,35,37}\text{Cl})$ , 41.0), 672 ( $\text{M}^+(\text{}^{37,37,37}\text{Cl})$ , 16.0), 674 ( $\text{M}^+(\text{}^{37,37,37}\text{Cl})$ , 2.0), 523 (100); IR (neat): 3053, 1651, 1575, 1482, 1442, 1389, 1263, 1182, 1092, 1014  $\text{cm}^{-1}$ ; HRMS calcd. for  $\text{C}_{42}\text{H}_{29}{}^{35,35,35}\text{Cl}_3\text{P}$  ( $(\text{M}+1)^+$ ): 669.1067; found: 669.1073.

**(18) Bis(4-bromophenyl){3-[1-(4-bromophenyl)-2,2-diphenylvinyl]naphthalen-2-yl}phos**

**phine (3r)**

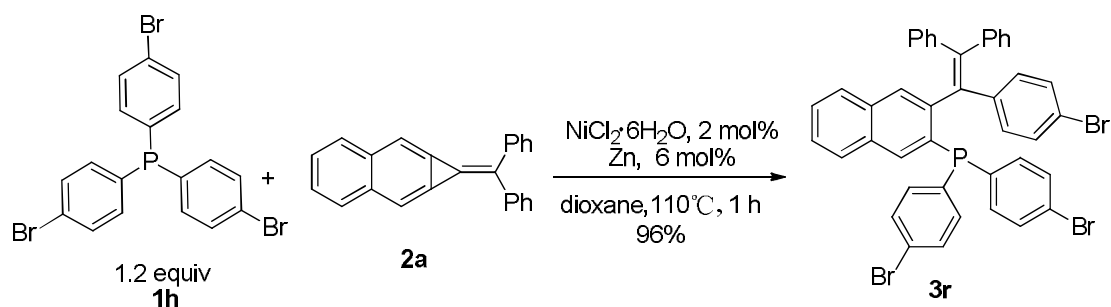

The reaction of  $\text{NiCl}_2 \cdot 6\text{H}_2\text{O}$  (1 mg, 0.004 mmol), Zn (1 mg, 0.012 mmol), **1h** (120 mg 0.24 mmol) and **2a** (61 mg, 0.2 mmol) in dioxane (1 mL) afforded **3r** (154 mg, 96%) as a white solid (eluent: petroleum ether/ $\text{CH}_2\text{Cl}_2 = 10:1$ ): m.p.  $250\text{-}252^\circ\text{C}$  (petroleum ether/ $\text{CH}_2\text{Cl}_2$ );  $^1\text{H}$  NMR (400 MHz,  $\text{CDCl}_3$ , 25 °C):  $\delta = 7.68\text{-}7.59$  (m, 3H), 7.47 (d,  $J = 8.0\text{Hz}$ , 1H), 7.43-7.36 (m, 4H), 7.32-7.28 (m, 2H), 7.18-7.12 (m, 7H), 7.00-6.97 (m, 3H), 6.88-6.76 (m, 6H), 6.64 (d,  $J = 8.4\text{Hz}$ , 2H) ppm;  $^{31}\text{P}$  NMR (162 MHz,  $\text{CDCl}_3$ , 25 °C):  $\delta = -15.51$  ppm;  $^{13}\text{C}$  NMR (100 MHz,  $\text{CDCl}_3$ , 25 °C):  $\delta = 145.8$  (d,  $J = 32.5\text{Hz}$ ), 143.4, 143.0, 142.9, 141.3,

139.1 (d,  $J = 6.1\text{Hz}$ ), 137.5 (d,  $J = 13.1\text{Hz}$ ), 136.7, 135.3 (d,  $J = 21.1\text{Hz}$ ), 134.7 (d,  $J = 12.6\text{Hz}$ ), 134.4 (d,  $J = 13.1\text{Hz}$ ), 134.3 (d,  $J = 18.7\text{Hz}$ ), 133.6, 133.2, 132.2, 131.5, 131.5 (d,  $J = 3.5\text{Hz}$ ), 131.4, 131.3, 131.2 (d,  $J = 7.2\text{Hz}$ ), 131.0, 130.4, 128.0, 127.8, 127.5, 127.2, 127.0, 126.6, 126.2, 123.5, 122.7, 120.7 ppm; MS(EI):  $m/z$  (%) = 800 ( $M^+(\text{}^{79,79,79}\text{Br})$ , 10.0), 802 ( $M^+(\text{}^{79,79,81}\text{Br})$ , 29.0), 804 ( $M^+(\text{}^{79,81,81}\text{Br})$ , 29.0), 806 ( $M^+(\text{}^{81,81,81}\text{Br})$ , 10.0), 647 (100); IR (neat): 3009, 1651, 1541, 1513, 1480, 1381, 1274, 1069  $\text{cm}^{-1}$ ; HRMS calcd. for  $\text{C}_{42}\text{H}_{29}{}^{79,79,79}\text{Br}_3\text{P}$  ( $(M+1)^+$ ): 800.9552; found: 800.9534; anal. calcd. for  $\text{C}_{42}\text{H}_{28}\text{Br}_3\text{P}$ : C 62.79, H 3.51; found: C 63.13, H 3.315.

**(19) Di(naphthalen-2-yl){3-[1-(naphthalen-2-yl)-2,2-diphenylvinyl]naphthalen-2-yl}phos**

**phine (3s)**

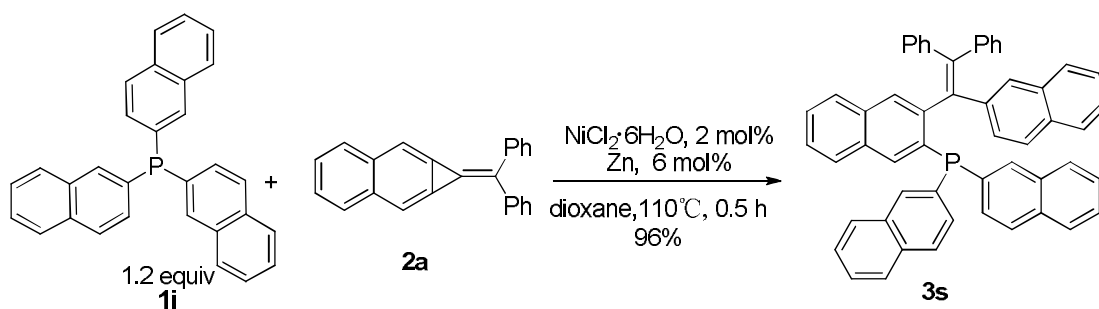

The reaction of  $\text{NiCl}_2 \cdot 6\text{H}_2\text{O}$  (1 mg, 0.004 mmol), Zn (1 mg, 0.012 mmol), **1i** (82 mg 0.24 mmol) and **2a** (61 mg, 0.2 mmol) in dioxane (1 mL) afforded **3m** (137 mg, 92%) as a white solid (eluent: petroleum ether/ $\text{CH}_2\text{Cl}_2 = 10:1$ ): m.p.  $200\text{-}202^\circ\text{C}$  (petroleum ether/ $\text{CH}_2\text{Cl}_2$ );  $^1\text{H}$  NMR (400 MHz,  $\text{CDCl}_3$ ,  $25^\circ\text{C}$ ):  $\delta = 7.78\text{-}7.73$  (m, 2H),  $7.72\text{-}7.64$  (m, 3H),  $7.55\text{-}7.51$  (m, 3H),  $7.41\text{-}7.09$  (m, 22H),  $7.03\text{-}6.99$  (m, 7H) ppm;  $^{31}\text{P}$  NMR (162 MHz,  $\text{CDCl}_3$ ,  $25^\circ\text{C}$ ):  $\delta = -12.09$  ppm;  $^{13}\text{C}$  NMR (100 MHz,  $\text{CDCl}_3$ ,  $25^\circ\text{C}$ ):  $\delta = 147.0$  (d,  $J = 32.8\text{Hz}$ ), 144.0, 143.4, 142.5, 140.7 (d,  $J = 4.9\text{Hz}$ ), 140.2, 137.0, 136.9 (d,  $J = 12.7\text{Hz}$ ), 136.0 (d,  $J = 12.2\text{Hz}$ ), 134.8,

134.6, 133.6, 133.3 (d,  $J = 4.0\text{Hz}$ ), 133.0, 132.9, 132.7, 132.6, 132.5, 132.3, 131.7 (broad peak, 2C), 131.5, 131.3, 131.22, 131.18, 130.0, 129.8, 129.6, 129.5, 128.0, 127.94, 127.87, 127.82, 127.6 (broad peak, 2C), 127.5, 127.4, 127.2 (d,  $J = 6.4\text{Hz}$ ), 126.78, 126.75, 126.7, 126.44, 126.38, 126.2, 126.13, 126.06, 125.8, 125.7, 125.5, 125.0 ppm; MS(EI):  $m/z$  (%) = 716 ( $M^+$ , 18.0), 44 (100); IR (neat): 3008, 1651, 1541, 1512, 1274  $\text{cm}^{-1}$ ; HRMS calcd. for  $\text{C}_{54}\text{H}_{38}\text{P}$  ( $(M+1)^+$ ): 717.2706; found: 717.2698.

**(20) Di(furan-2-yl){3-[1-(furan-2-yl)-2,2-diphenylvinyl]naphthalen-2-yl}phosphine (3t)**

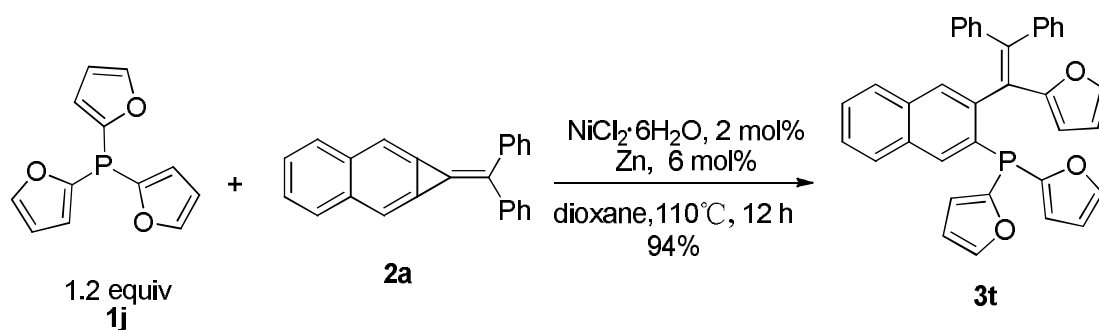

The reaction of  $\text{NiCl}_2 \cdot 6\text{H}_2\text{O}$  (1 mg, 0.004 mmol), Zn (1 mg, 0.012 mmol), **1j** (55 mg 0.24 mmol) and **2a** (61 mg, 0.2 mmol) in dioxane (1 mL) afforded **3t** (100 mg, 94%) as a white solid (eluent: petroleum ether/ $\text{CH}_2\text{Cl}_2 = 10:1$ ): m.p.  $144\text{-}146^\circ\text{C}$  (petroleum ether/ $\text{CH}_2\text{Cl}_2$ );  $^1\text{H}$  NMR (400 MHz,  $\text{CDCl}_3$ ,  $25^\circ\text{C}$ ):  $\delta = 7.99\text{-}7.96$  (m, 1H),  $7.72\text{-}7.69$  (m, 1H),  $7.67\text{-}7.59$  (m, 3H),  $7.57$  (s, 1H),  $7.39\text{-}7.34$  (m, 2H),  $7.34\text{-}7.25$  (m, 5H),  $7.02$  (s, 1H),  $6.96\text{-}6.93$  (m, 2H),  $6.89\text{-}6.86$  (m, 3H),  $6.58$  (s, 1H),  $6.52$  (s, 1H),  $6.39\text{-}6.37$  (m, 1H),  $6.31\text{-}6.29$  (m, 1H),  $6.10\text{-}6.08$  (m, 1H),  $5.50\text{-}5.47$  (m, 1H) ppm;  $^{31}\text{P}$  NMR (162 MHz,  $\text{CDCl}_3$ ,  $25^\circ\text{C}$ ):  $\delta = -57.73$  ppm;  $^{13}\text{C}$  NMR (100 MHz,  $\text{CDCl}_3$ ,  $25^\circ\text{C}$ ):  $\delta = 154.8$ ,  $151.2$  (d,  $J = 11.3\text{Hz}$ ),  $150.5$  (d,  $J = 12.3\text{Hz}$ ),  $147.2$ ,  $147.1$ ,  $143.7$ ,  $142.3$ ,  $141.8$ ,  $141.5$ ,  $141.2$ ,  $135.2$ ,  $133.4$ ,  $133.2$  (d,  $J = 3.4\text{Hz}$ ),  $132.4$ ,  $131.0$  (d,  $J = 6.1\text{Hz}$ ),  $130.7$ ,  $130.1$ ,  $129.4$  (d,  $J = 6.6\text{Hz}$ ),  $128.2$ ,  $128.0$ ,  $127.5$ ,  $127.3$ ,  $126.9$ ,

126.7, 126.3, 126.0, 121.2 (d,  $J = 15.2\text{Hz}$ ), 121.0 (d,  $J = 12.9\text{Hz}$ ), 112.4, 111.0, 110.8 (d,  $J = 5.4\text{Hz}$ ), 110.6 (d,  $J = 6.2\text{Hz}$ ) ppm; MS(EI):  $m/z$  (%) = 536 ( $M^+$ , 19.0), 43 (100); IR (neat): 3053, 1555, 1489, 1453, 1367, 1265, 1155, 1008  $\text{cm}^{-1}$ ; HRMS calcd. for  $\text{C}_{36}\text{H}_{26}\text{O}_3\text{P}$  ( $(M+1)^+$ ): 537.1614; found: 537.1623. ; anal. calcd. for  $\text{C}_{36}\text{H}_{25}\text{O}_3\text{P}$ : C 80.59, H 4.70; found: C 80.41, H 4.634.

**(21) Dibutyl[3-(1,2,2-triphenylvinyl)naphthalen-2-yl]phosphine (3u)**

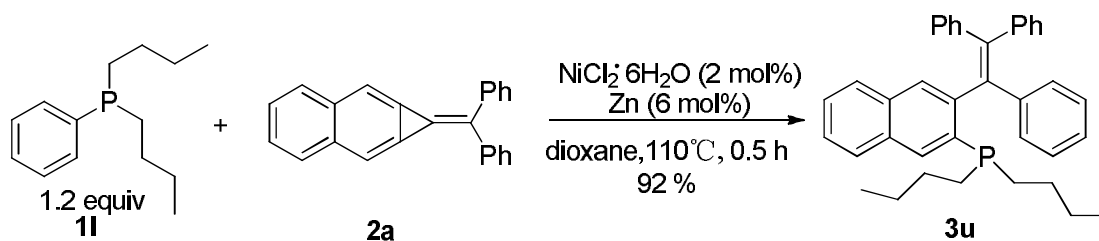

The reaction of  $\text{NiCl}_2 \cdot 6\text{H}_2\text{O}$  (1 mg, 0.004 mmol), Zn (1 mg, 0.012 mmol), **11** (53 mg, 0.24 mmol) and **2a** (61 mg, 0.2 mmol) in dioxane (1 mL) afforded **3u** (97 mg, 92%) as a colorless oil (eluent: petroleum ether/ $\text{CH}_2\text{Cl}_2 = 10:1$ ):  $^1\text{H}$  NMR (400 MHz,  $\text{CDCl}_3$ ,  $25^\circ\text{C}$ ):  $\delta = 7.88$  (m, 1H), 7.76 (d,  $J = 6.8\text{Hz}$ , 1H), 7.66-7.62 (m, 1H), 7.60 (d,  $J = 2.8\text{Hz}$ , 1H), 7.40-7.36 (m, 2H), 7.18-7.11 (m, 7H), 7.04-6.90 (m, 8H) 1.64-1.60 (m, 2H), 1.45-1.38 (m, 4H), 1.07-0.89 (m, 8H), 0.72-0.66 (m, 4H) ppm;  $^{31}\text{P}$  NMR (162 MHz,  $\text{CDCl}_3$ ,  $25^\circ\text{C}$ ):  $\delta = -34.82$  ppm;  $^{13}\text{C}$  NMR (100 MHz,  $\text{CDCl}_3$ ,  $25^\circ\text{C}$ ):  $\delta = 146.9$  (d,  $J = 30.4\text{Hz}$ ), 143.7, 143.4, 143.2, 141.2, 137.1, 133.3, 132.2, 131.8, 131.5 (broad peak, 2C), 131.3, 130.9, 130.2, 128.8, 127.6, 127.5, 127.3 (broad peak, 2C), 126.5, 126.2 (broad peak, 2C), 125.6, 29.7, 28.7 (d,  $J = 16.6\text{Hz}$ ), 28.0 (d,  $J = 12.7\text{Hz}$ ), 27.5 (d,  $J = 11.3\text{Hz}$ ), 24.8 (d,  $J = 12.4\text{Hz}$ ), 24.3 (d,  $J = 11.3\text{Hz}$ ), 14.0, 13.7 ppm; MS(EI):  $m/z$  (%) = 526 ( $M^+$ , 16.0), 149 (100); IR (neat): 3053, 2957, 2927, 2868, 1597, 1490, 1443, 1379, 1274, 1171, 1075, 1031  $\text{cm}^{-1}$ ; HRMS calcd. for  $\text{C}_{38}\text{H}_{40}\text{P}$  ( $(M+1)^+$ ): 527.2862;



found: 527.2865.

**(22) Dicyclohexyl[3-(1,2,2-triphenylvinyl)naphthalen-2-yl]phosphine (3v)**

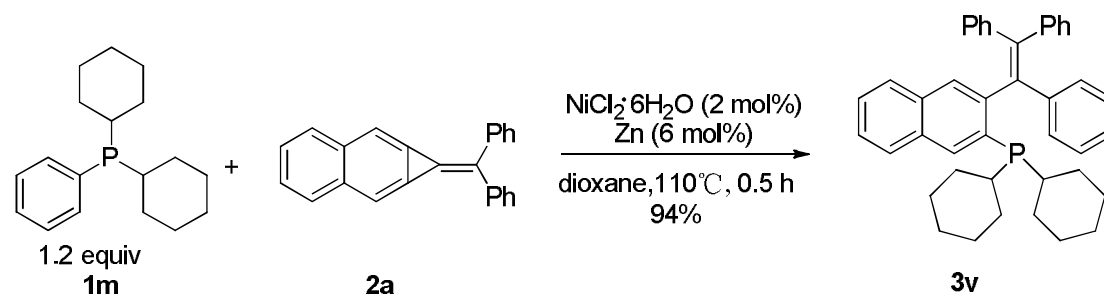

The reaction of  $\text{NiCl}_2 \cdot 6\text{H}_2\text{O}$  (1 mg, 0.004 mmol), Zn (1 mg, 0.012 mmol), **1m** (66 mg, 0.24 mmol) and **2a** (61 mg, 0.2 mmol) in dioxane (1 mL) afforded **3v** (109 mg, 94%) as a colorless oil (eluent: petroleum ether/ $\text{CH}_2\text{Cl}_2$  = 10:1):  $^1\text{H}$  NMR (400 MHz,  $\text{CDCl}_3$ , 25 °C):  $\delta$  = 7.87 (s, 1H), 7.77 (d,  $J$  = 7.2 Hz, 1H), 7.65-7.58 (m, 2H), 7.41-7.33 (m, 2H), 7.24 (d,  $J$  = 7.6 Hz, 2H), 7.13-7.08 (m, 5H), 7.08-6.96 (m, 5H), 6.96-6.85 (m, 3H), 2.2 (s, 1H), 1.96-1.81 (m, 2H), 1.74-1.62 (m, 4H), 1.55-1.25 (m, 9H), 1.01-0.83 (m, 3H), 0.71-0.59 (m, 2H), 0.27 (t,  $J$  = 11.8 Hz, 1H) ppm;  $^{31}\text{P}$  NMR (162 MHz,  $\text{CDCl}_3$ , 25 °C):  $\delta$  = -8.52 ppm;  $^{13}\text{C}$  NMR (100 MHz,  $\text{CDCl}_3$ , 25 °C):  $\delta$  = 147.4 (d,  $J$  = 31.0 Hz), 143.8, 143.2, 142.9, 142.0 (d,  $J$  = 4.4 Hz), 141.0, 135.3 (d,  $J$  = 18.3 Hz), 133.1, 133.0, 131.8, 131.7, 131.6, 131.5, 130.7 (broad peak, 2C), 127.6, 127.5 (broad peak, 2C), 127.4, 127.2, 126.4, 126.1, 126.0, 125.5, 35.4 (d,  $J$  = 15.4 Hz), 33.5 (d,  $J$  = 14.3 Hz), 32.4 (d,  $J$  = 20.4 Hz), 30.4 (d,  $J$  = 15.9 Hz), 27.5 (d,  $J$  = 4.5 Hz), 27.4 (d,  $J$  = 6.4 Hz), 27.3, 27.0 (d,  $J$  = 10.4 Hz), 26.4, 26.2 ppm; MS(EI):  $m/z$  (%) = 578 ( $\text{M}^+$ , 17.0), 501 (100); IR (neat): 2930, 2853, 1541, 1491, 1450, 1274, 1175  $\text{cm}^{-1}$ ; HRMS calcd. for  $\text{C}_{42}\text{H}_{44}\text{P}$  ( $(\text{M}+1)^+$ ): 579.3175; found: 579.3172.

(23) Diphenyl[3-(1,2,2-triphenylvinyl)naphthalen-2-yl]arsine (**3w**)

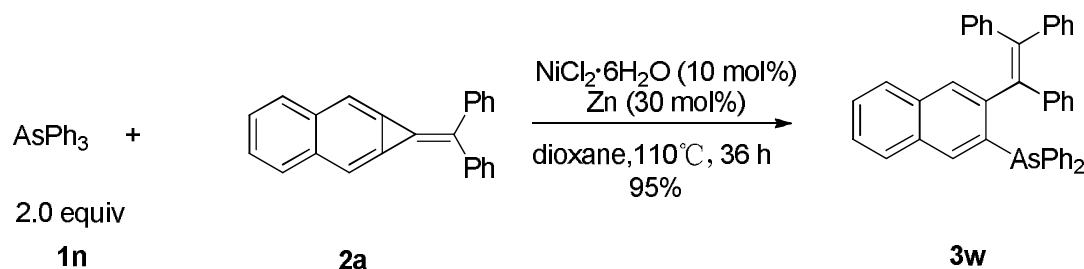

The reaction of  $\text{NiCl}_2 \cdot 6\text{H}_2\text{O}$  (1 mg, 0.004 mmol), Zn (1 mg, 0.012 mmol), **1n** (73 mg, 0.24 mmol) and **2a** (61 mg, 0.2 mmol) in dioxane (1 mL) afforded **3w** (116 mg, 95%) as a white solid (eluent: petroleum ether/ $\text{CH}_2\text{Cl}_2$  = 10:1): m.p.  $212\text{--}214^\circ\text{C}$  (petroleum ether/ $\text{CH}_2\text{Cl}_2$ );  $^1\text{H}$  NMR (400 MHz,  $\text{CDCl}_3$ ,  $25^\circ\text{C}$ ):  $\delta$  = 7.68–7.63 (m, 2H), 7.57–7.53 (m, 2H), 7.38–7.31 (m, 2H), 7.25–6.10 (m, 15H), 6.98–6.82 (m, 5H), 6.86–6.81 (m, 5H) ppm;  $^{13}\text{C}$  NMR (100 MHz,  $\text{CDCl}_3$ ,  $25^\circ\text{C}$ ):  $\delta$  = 146.4, 143.6, 143.5, 143.0, 142.5, 141.1, 140.8, 140.1, 139.3, 136.1, 133.7, 133.3 (broad peak, 2C), 132.5, 131.6, 131.55, 131.49, 130.5, 128.4, 128.3, 128.1, 127.77 (broad peak, 2C), 127.75, 127.6, 127.4, 127.3, 126.6, 126.41, 126.37, 126.2, 125.6 ppm; MS(EI):  $m/z$  (%) = 610 ( $\text{M}^+$ , 27.0), 381 (100); IR (neat): 3053, 1578, 1558, 1541, 1491, 1438, 1264, 1182, 1137, 1085,  $1030\text{ cm}^{-1}$ ; HRMS calcd. for  $\text{C}_{42}\text{H}_{32}^{74}\text{As}$  ( $(\text{M}+1)^+$ ): 611.1709; found: 611.1699.

7.665  
7.650  
7.628  
7.552  
7.536  
7.377  
7.360  
7.340  
7.323  
7.304  
7.286  
7.220  
7.206  
7.188  
7.169  
7.154  
7.151  
7.134  
7.129  
7.111  
7.109  
7.092  
7.072  
7.057  
7.053  
6.948  
6.940  
6.924  
6.904  
6.821  
6.798  
6.794  
6.783

0.000

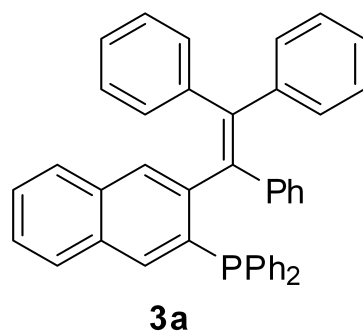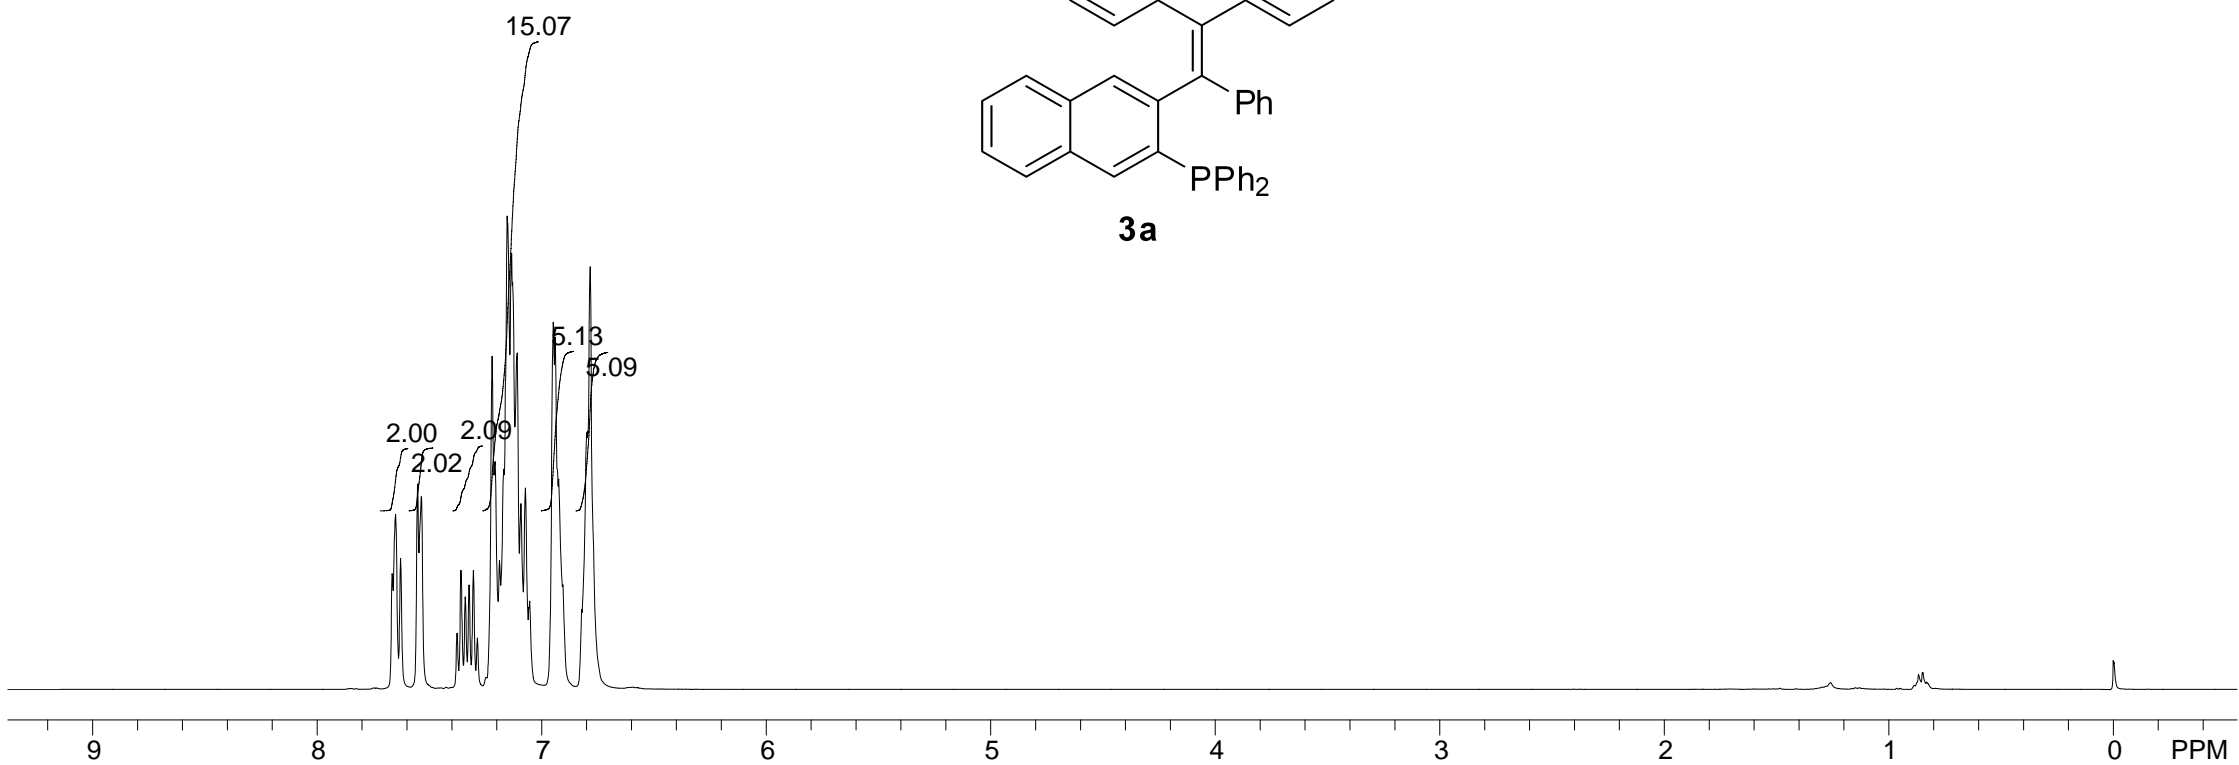

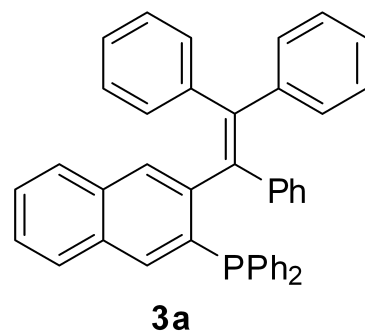

13.798

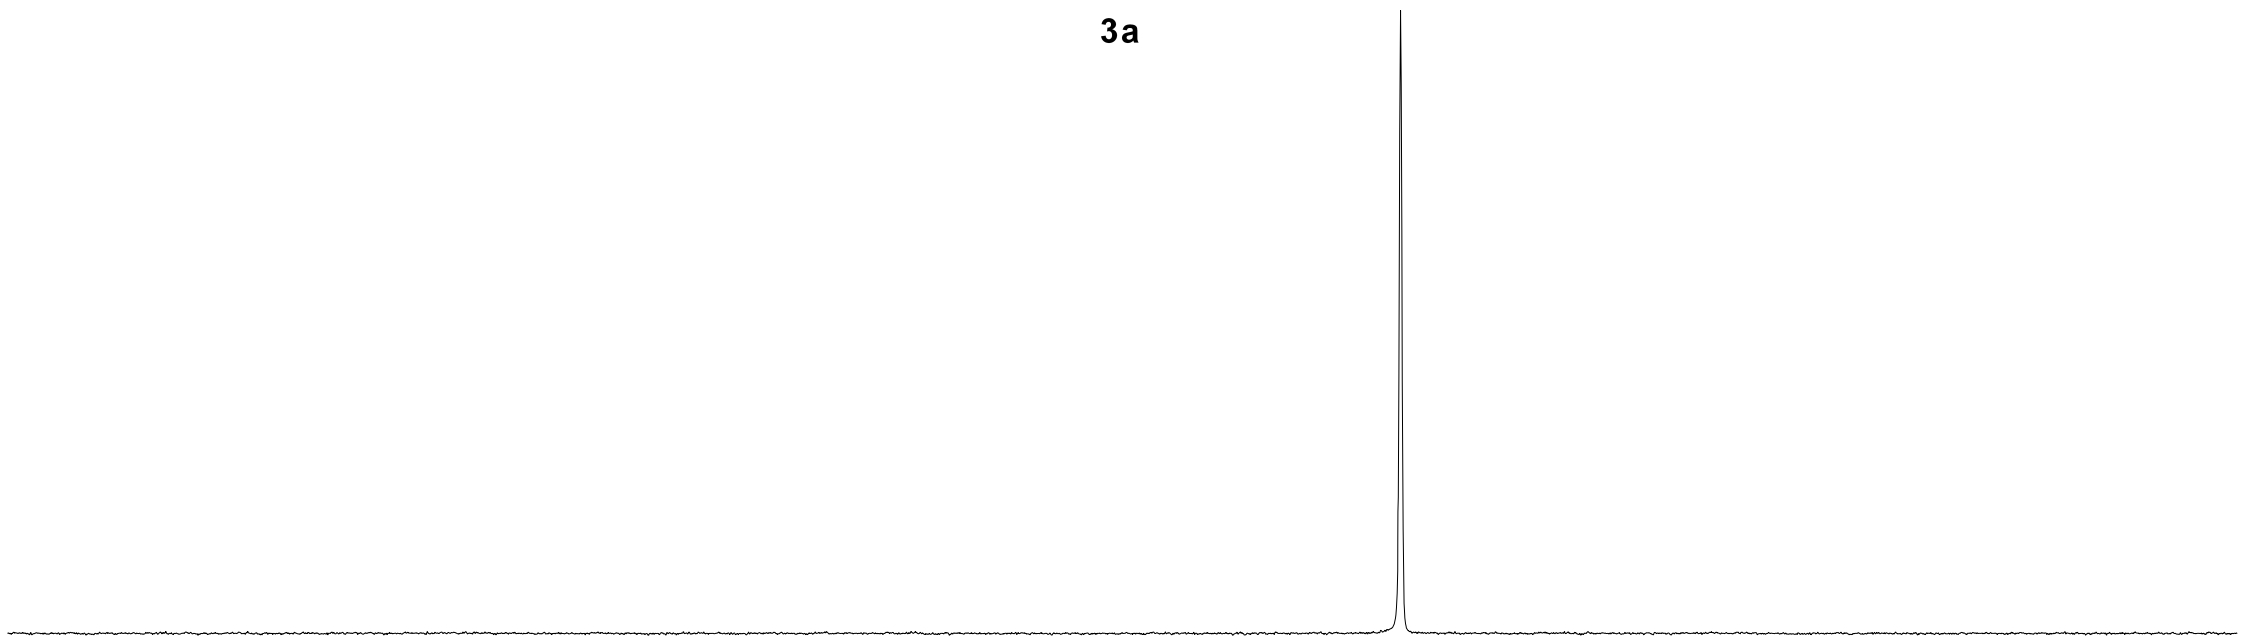

40

20

0

-20

-40

PPM

S28

146.712  
146.397  
143.717  
143.685  
142.825  
142.334  
142.318  
140.486  
140.440  
138.985  
138.848  
137.051  
136.914  
136.729  
136.698  
136.162  
136.021  
134.099  
133.899  
133.487  
133.047  
132.872  
132.239  
131.622  
131.501  
131.379  
130.957  
130.884  
128.313  
128.184  
128.138  
128.118  
128.045  
127.868  
127.702  
127.517  
127.368  
127.173  
126.695  
126.517  
126.268  
126.085  
125.686  
77.316  
77.000  
76.683

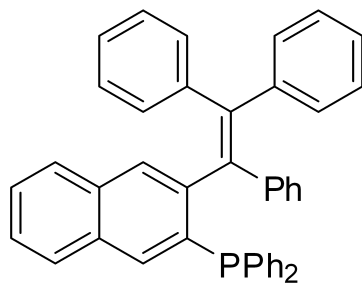

**3a**

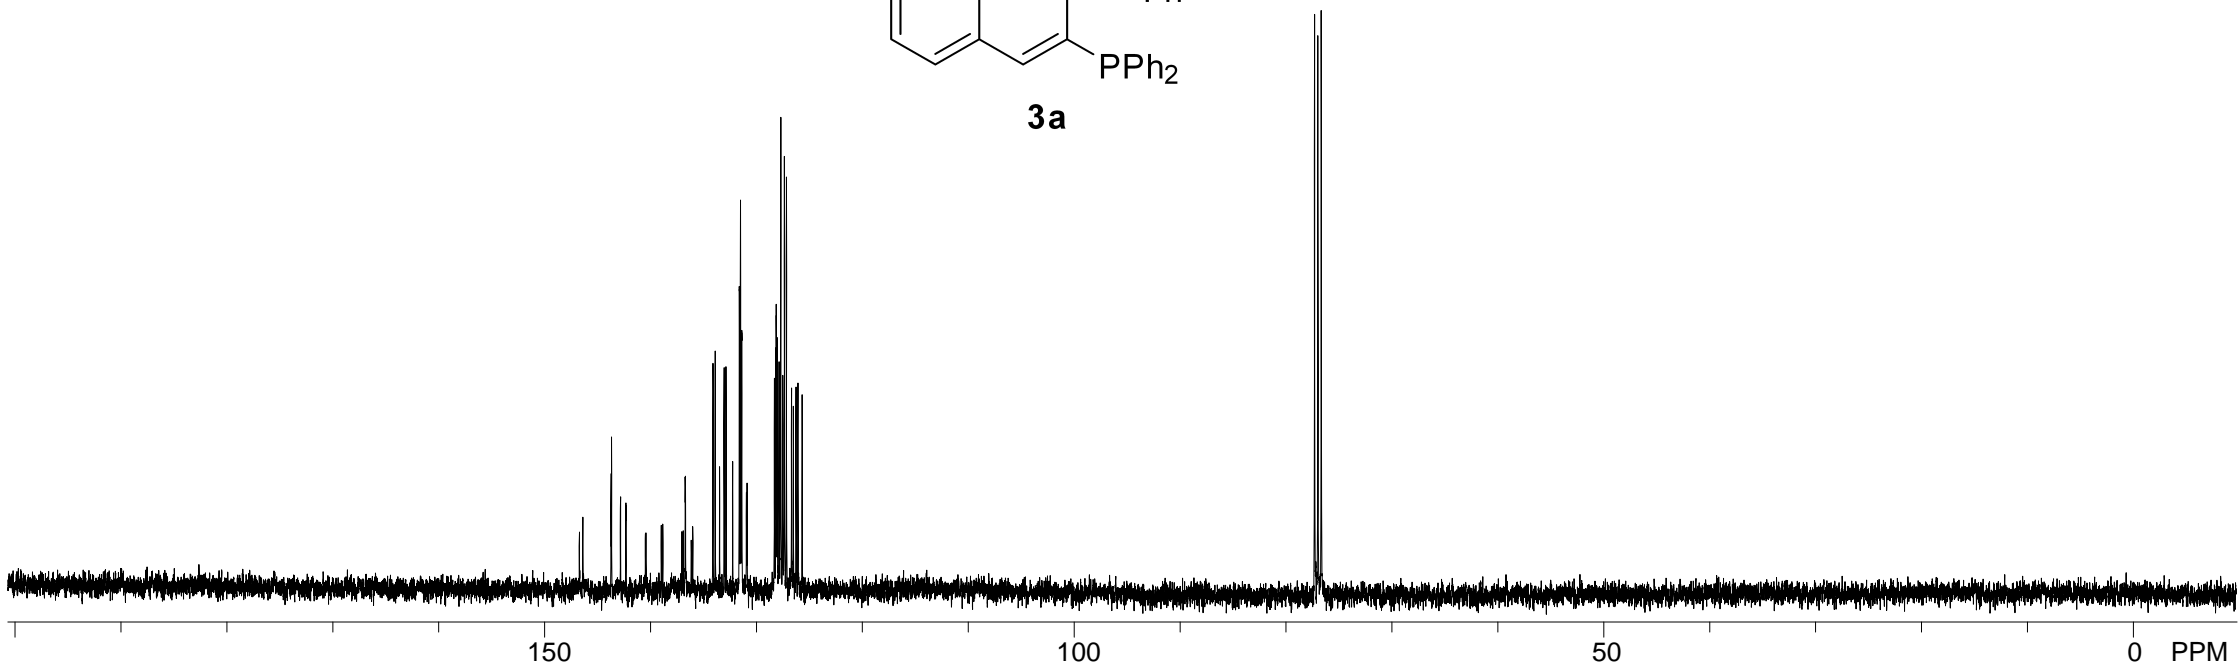

146.712  
146.397

143.717  
143.685

142.825  
142.334  
142.318

140.486  
140.440

138.985  
138.848

137.051  
136.914  
136.729  
136.698  
136.162  
136.021

134.099  
133.899  
133.487  
133.047  
132.872

132.239  
131.622  
131.501  
131.379  
130.957  
130.884

128.313  
128.184  
128.138  
128.118  
128.045  
127.868  
127.702  
127.517  
127.368  
127.173  
126.695  
126.517  
126.268  
126.085  
125.686

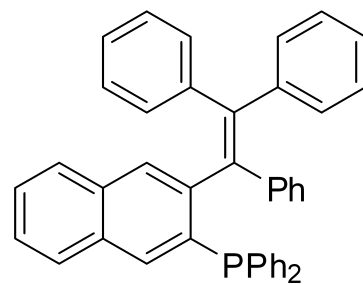

**3a**

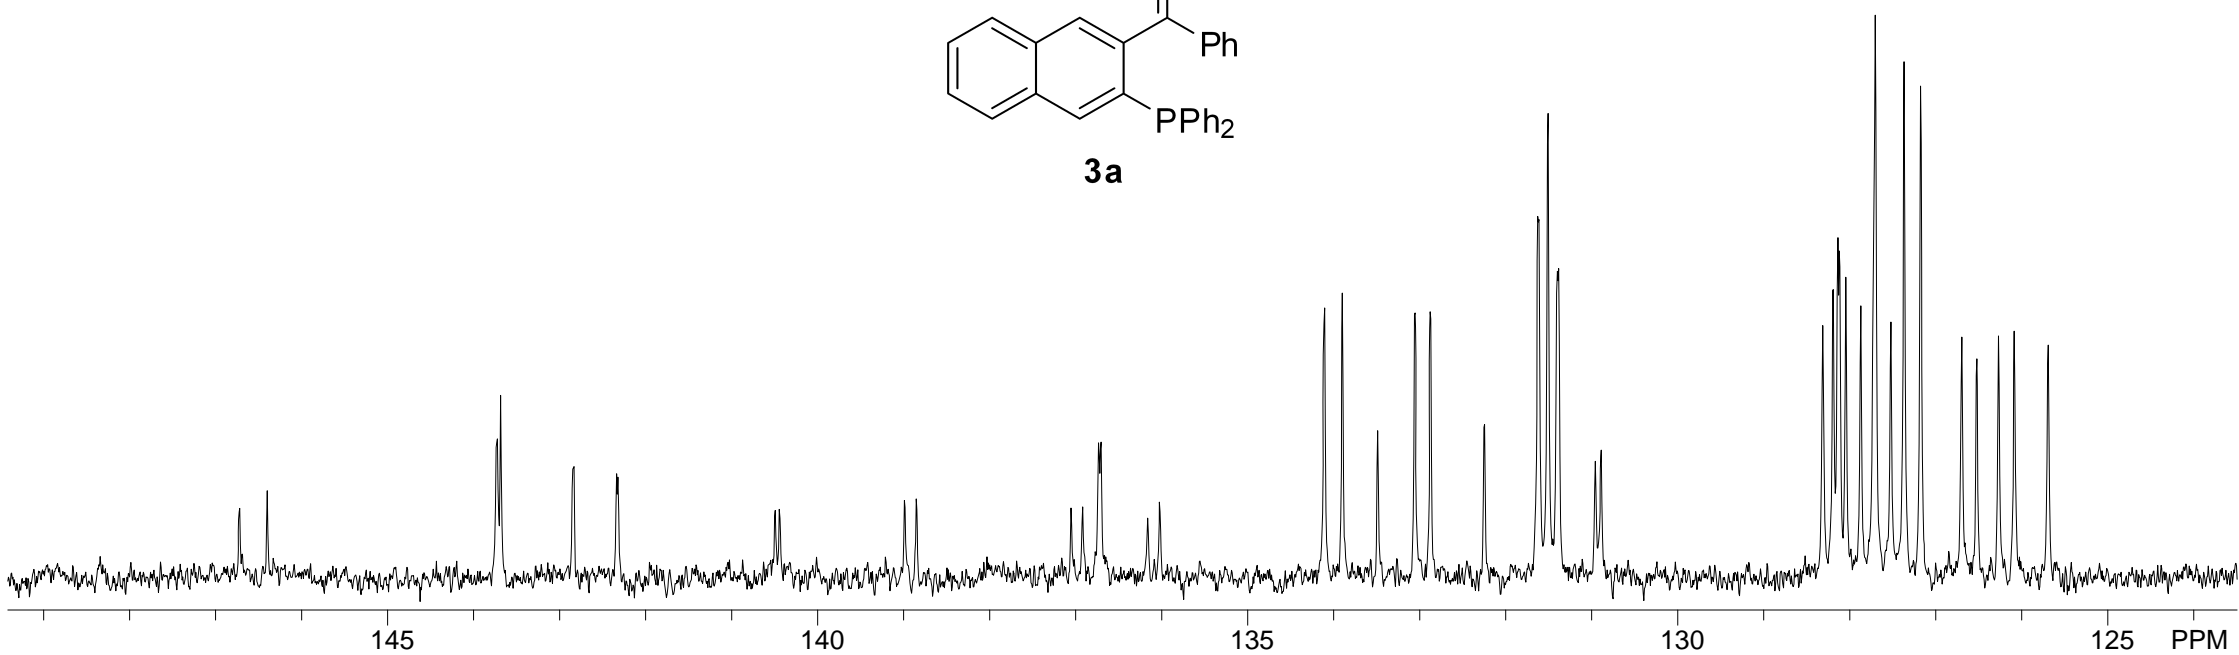

7.662  
7.652  
7.632  
7.560  
7.550  
7.540  
7.356  
7.337  
7.319  
7.300  
7.211  
7.195  
7.184  
7.168  
7.154  
7.135  
7.118  
7.099  
7.080  
7.057  
7.037  
7.021  
7.001  
6.941  
6.921  
6.903  
6.886  
6.832  
6.822  
6.814  
6.796  
6.739  
6.721

2.246  
2.141

0.000

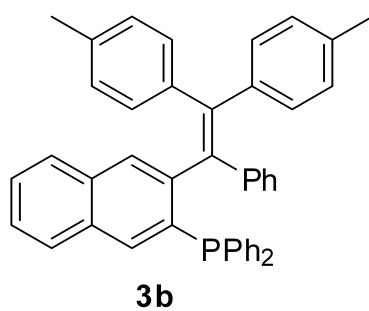

12.41  
4.95  
4.07  
2.01  
2.06  
2.00  
2.07

3.00  
3.02

8

6

4

2

0

PPM

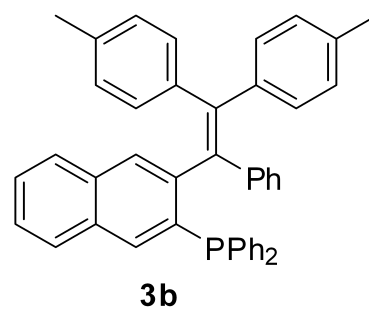

13.872

200

150

100

50

0

-50

PPM

S32



147.189  
146.856  
143.294  
142.216  
140.906  
140.881  
139.438  
139.383  
139.089  
138.948  
137.285  
137.146  
136.791  
136.771  
136.217  
136.079  
136.028  
135.746  
134.048  
133.832  
133.523  
132.997  
132.813  
132.162  
131.572  
131.425  
131.378  
130.916  
130.847  
128.391  
128.248  
128.091  
128.040  
127.850  
127.573  
127.546  
127.163  
126.597  
125.825  
125.555  
77.326  
77.207  
77.000  
76.688

21.228  
21.072

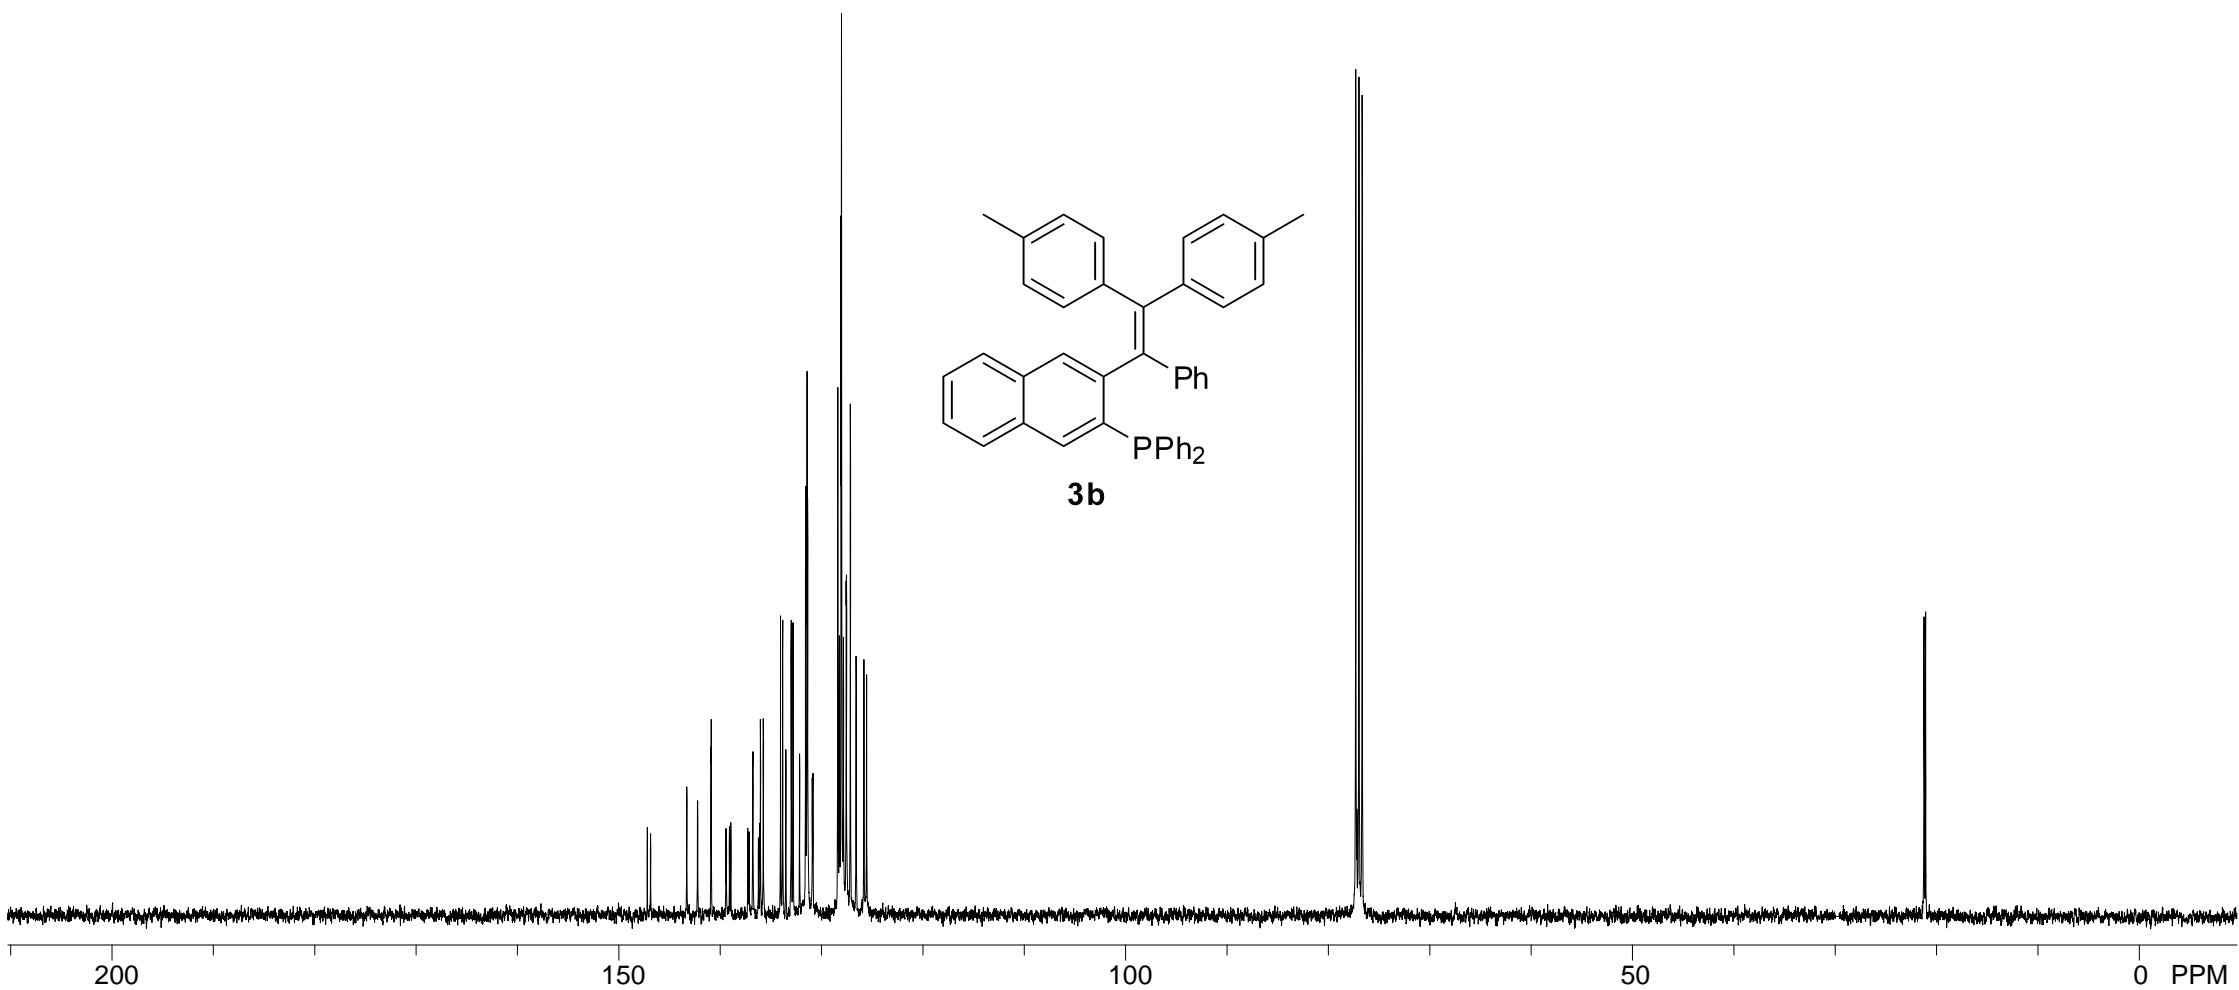

147.189  
146.856

143.294  
142.216

140.906  
140.881

139.438  
139.383  
139.089  
138.948

137.285  
137.146  
136.791  
136.771  
136.217  
136.079  
136.028  
135.746

134.048  
133.832  
133.523  
132.997  
132.813

132.162  
131.572  
131.425  
131.378  
130.916  
130.847

128.391  
128.248  
128.091  
128.040  
127.850  
127.573  
127.546  
127.163  
126.597  
125.825  
125.555

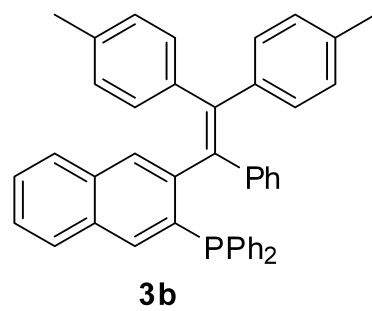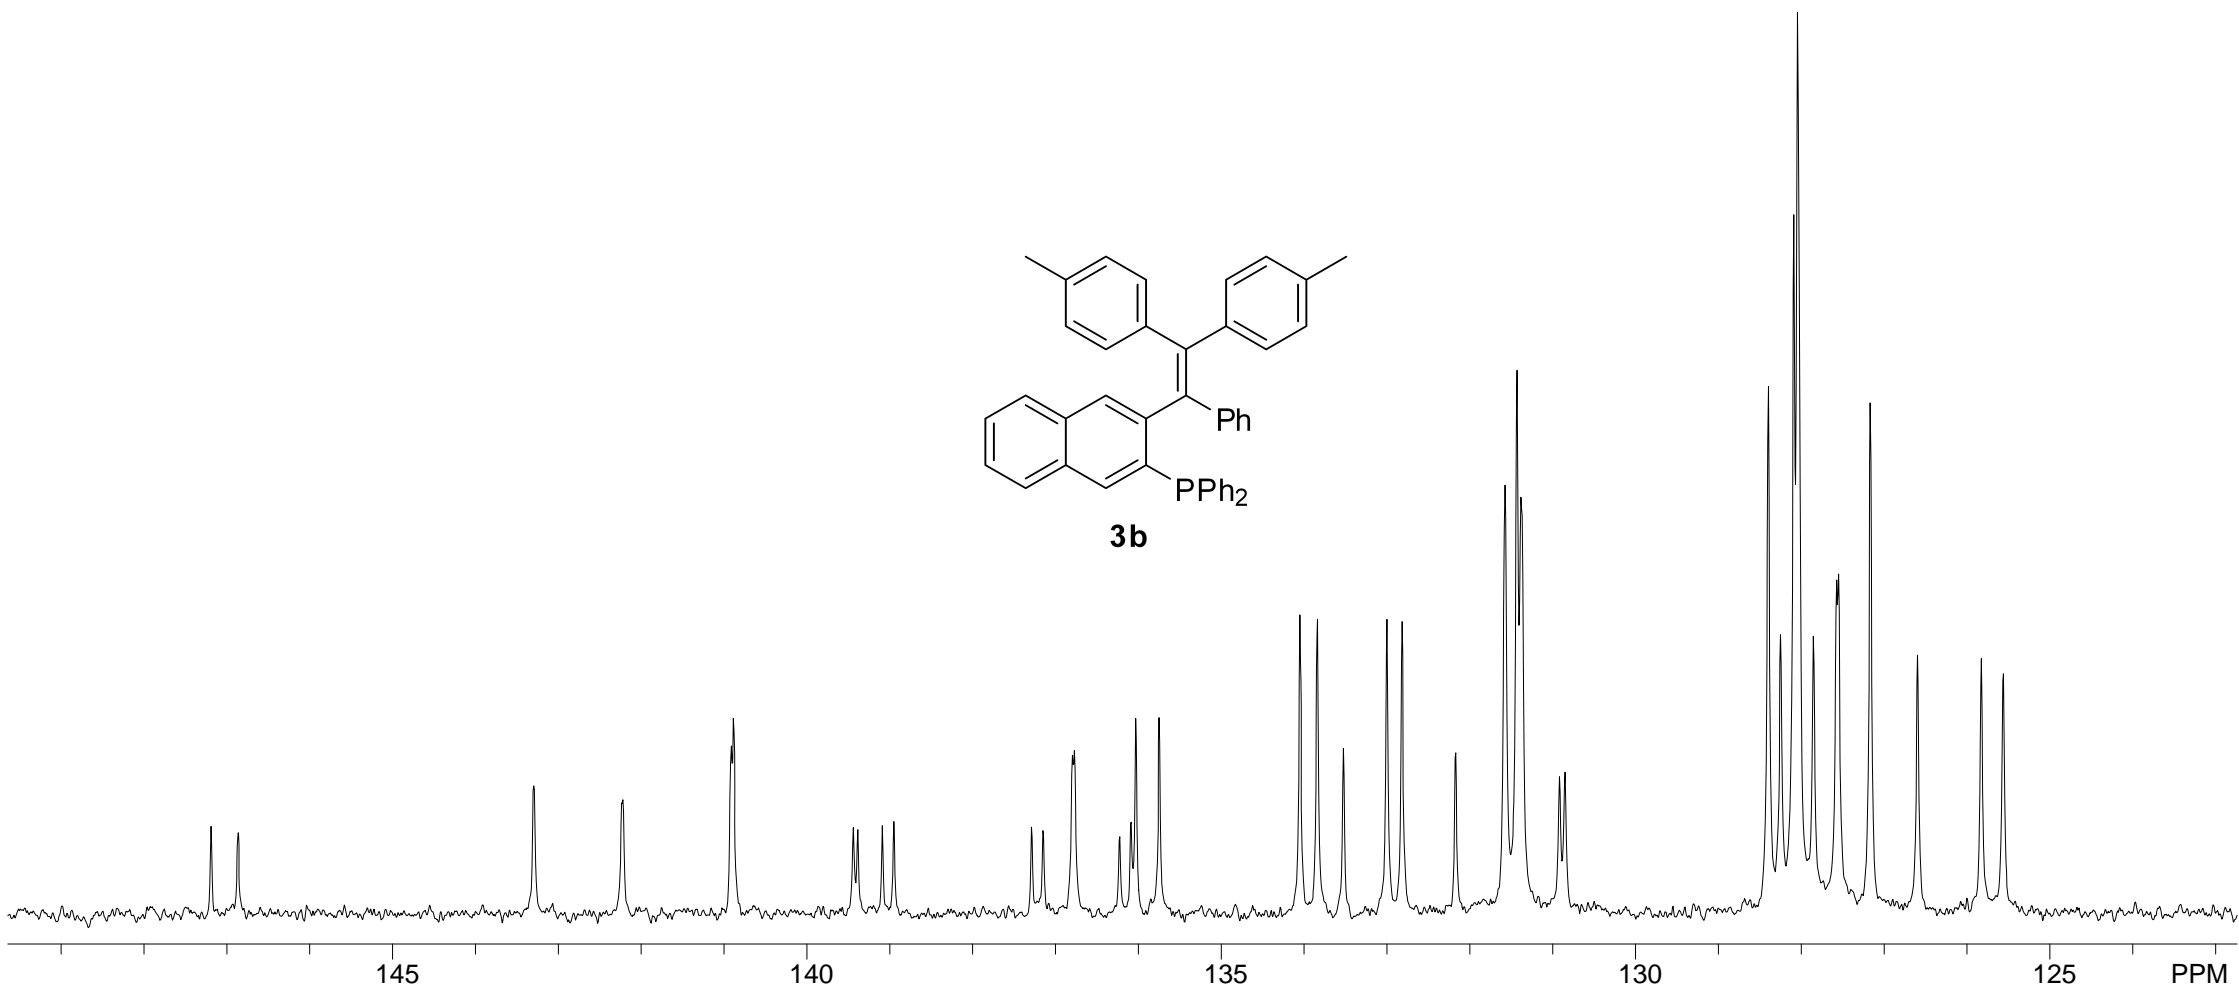

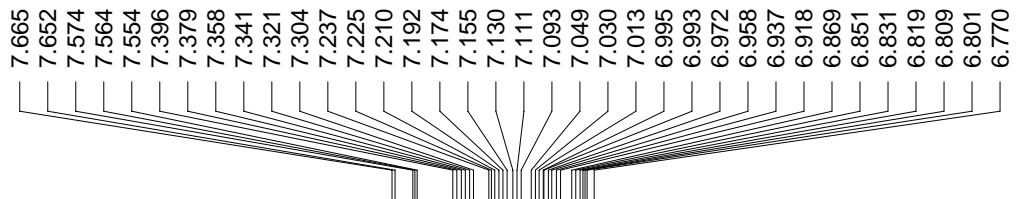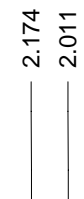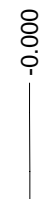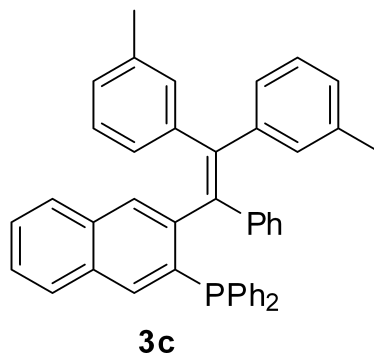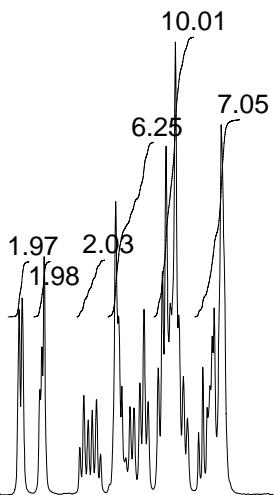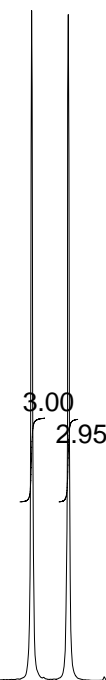

9

8

7

6

5

4

3

2

1

0PPM

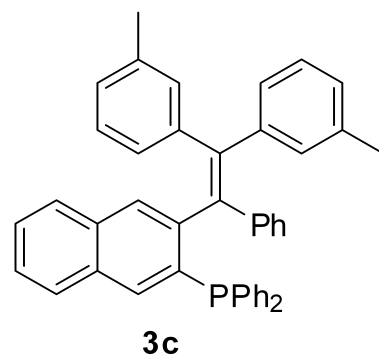

13.973

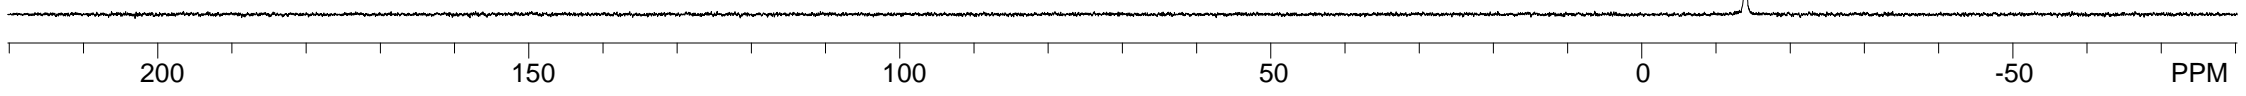

146.903  
146.571  
143.700  
143.472  
142.737  
142.408  
140.326  
140.271  
139.246  
139.113  
137.039  
136.906  
136.739  
136.187  
136.048  
133.999  
133.791  
133.484  
133.008  
132.827  
132.179  
132.085  
131.781  
131.610  
130.856  
130.791  
128.595  
128.449  
128.187  
128.148  
128.094  
128.002  
127.930  
127.839  
127.669  
127.524  
127.434  
127.237  
127.180  
127.063  
126.631  
125.960  
125.577  
77.318  
77.204  
77.000  
76.675  
21.338  
21.196

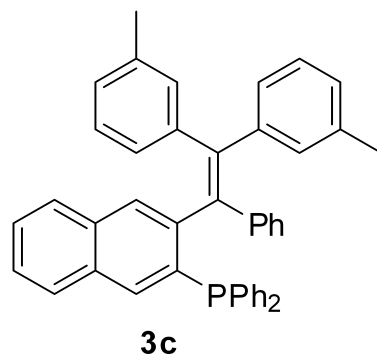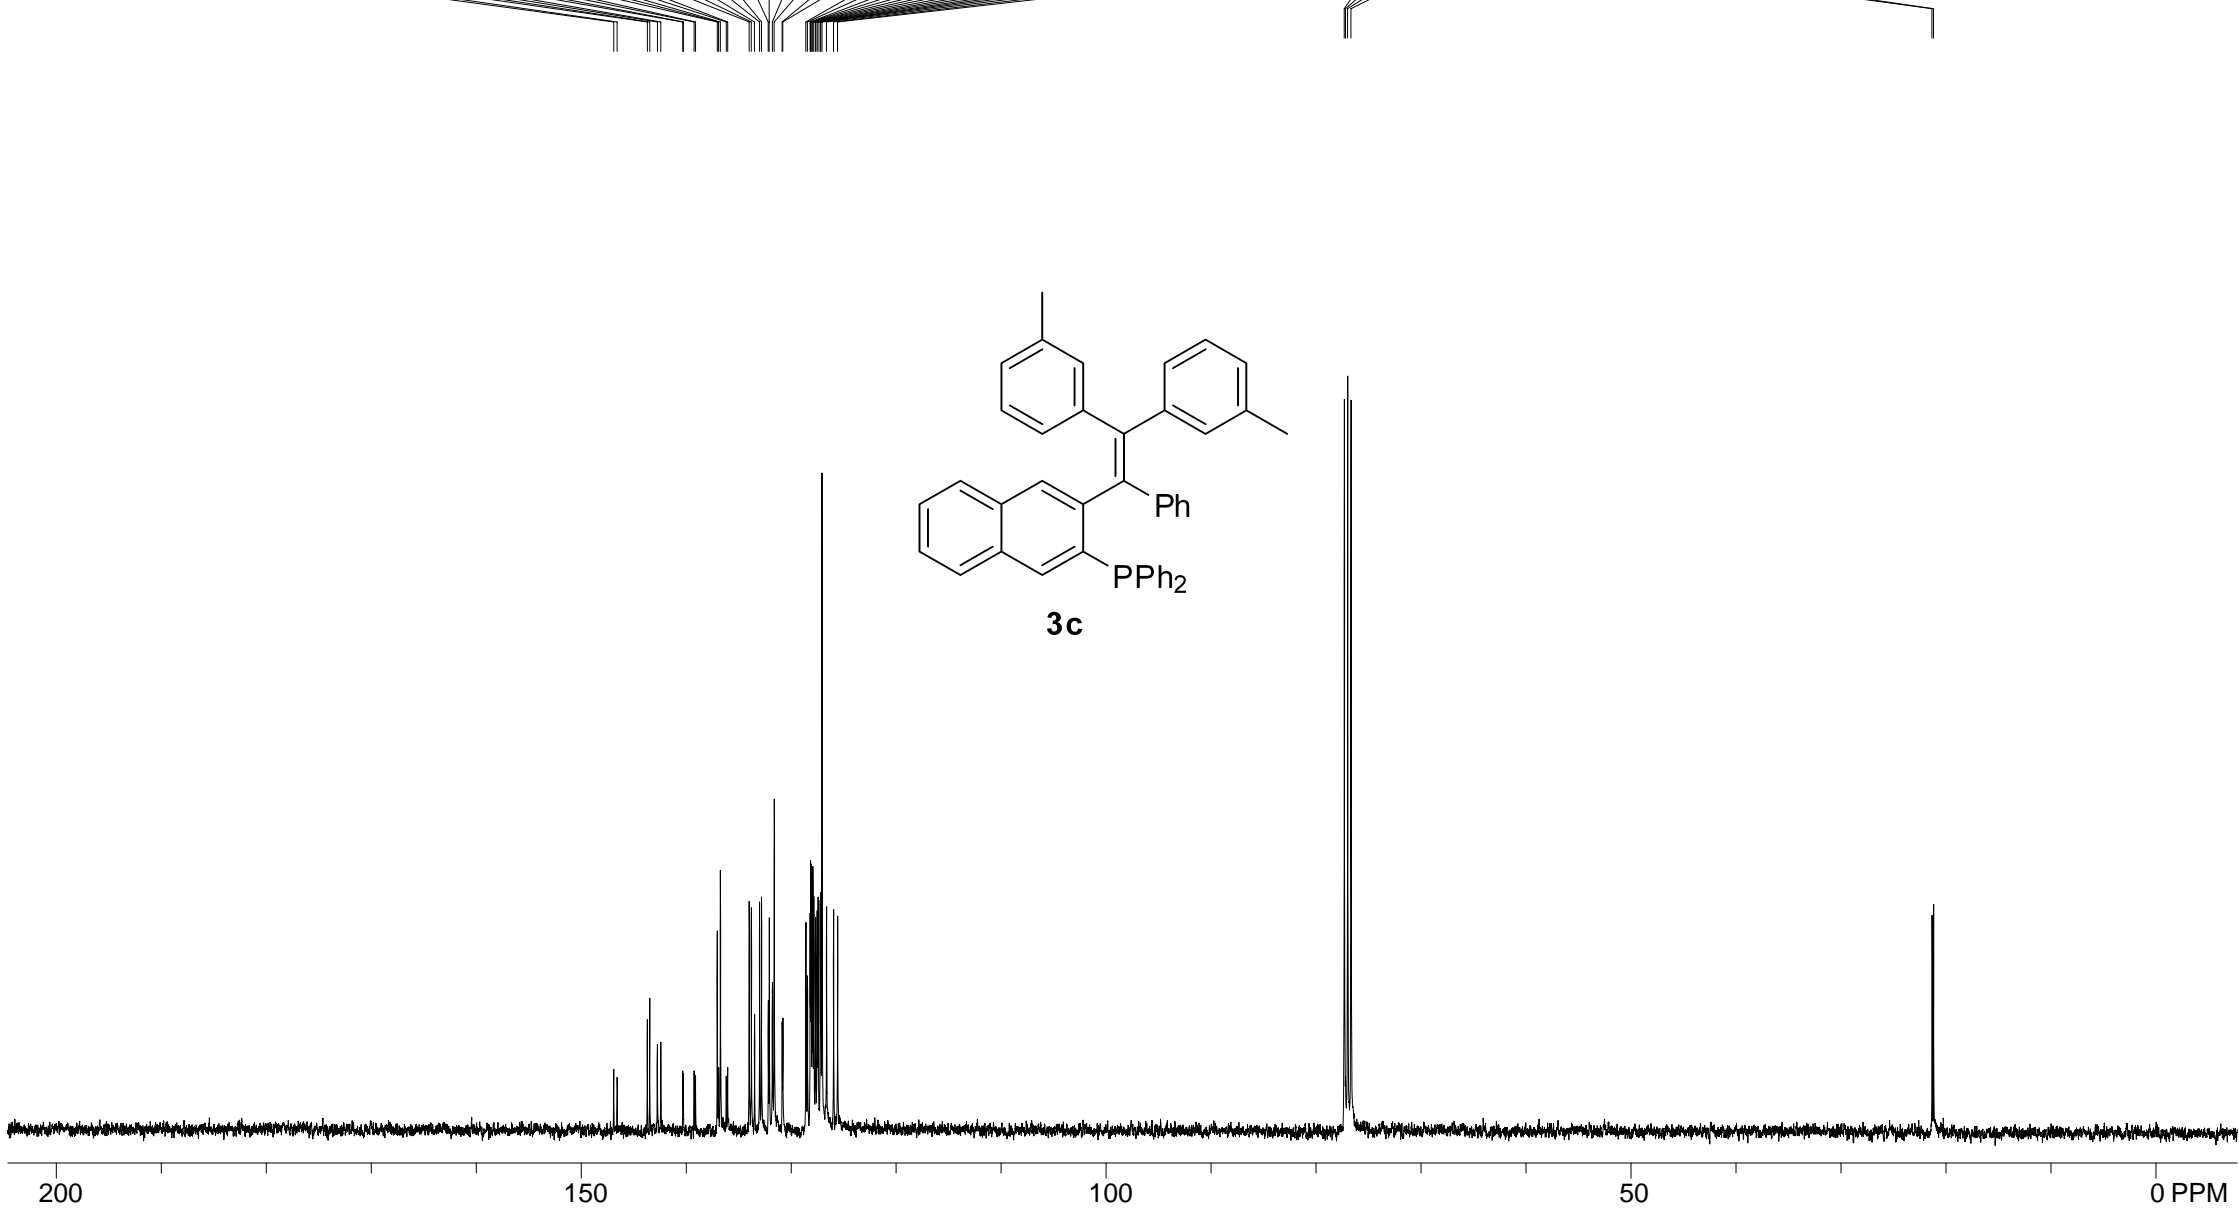

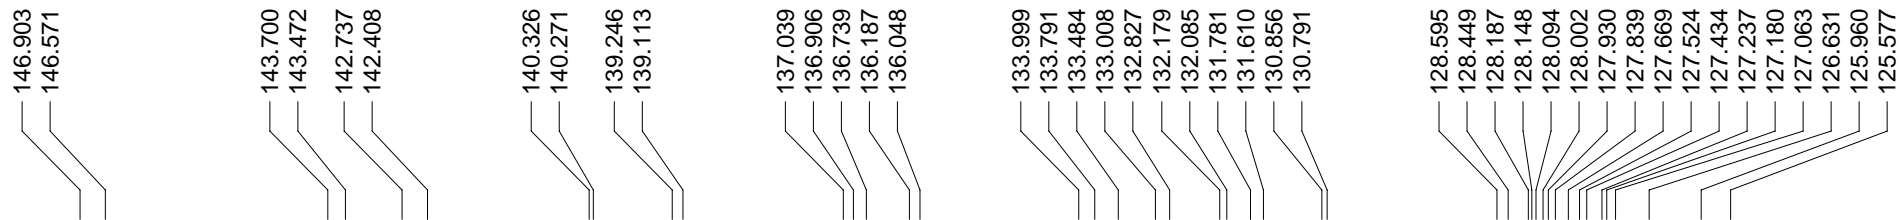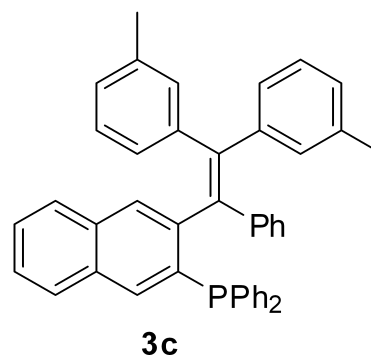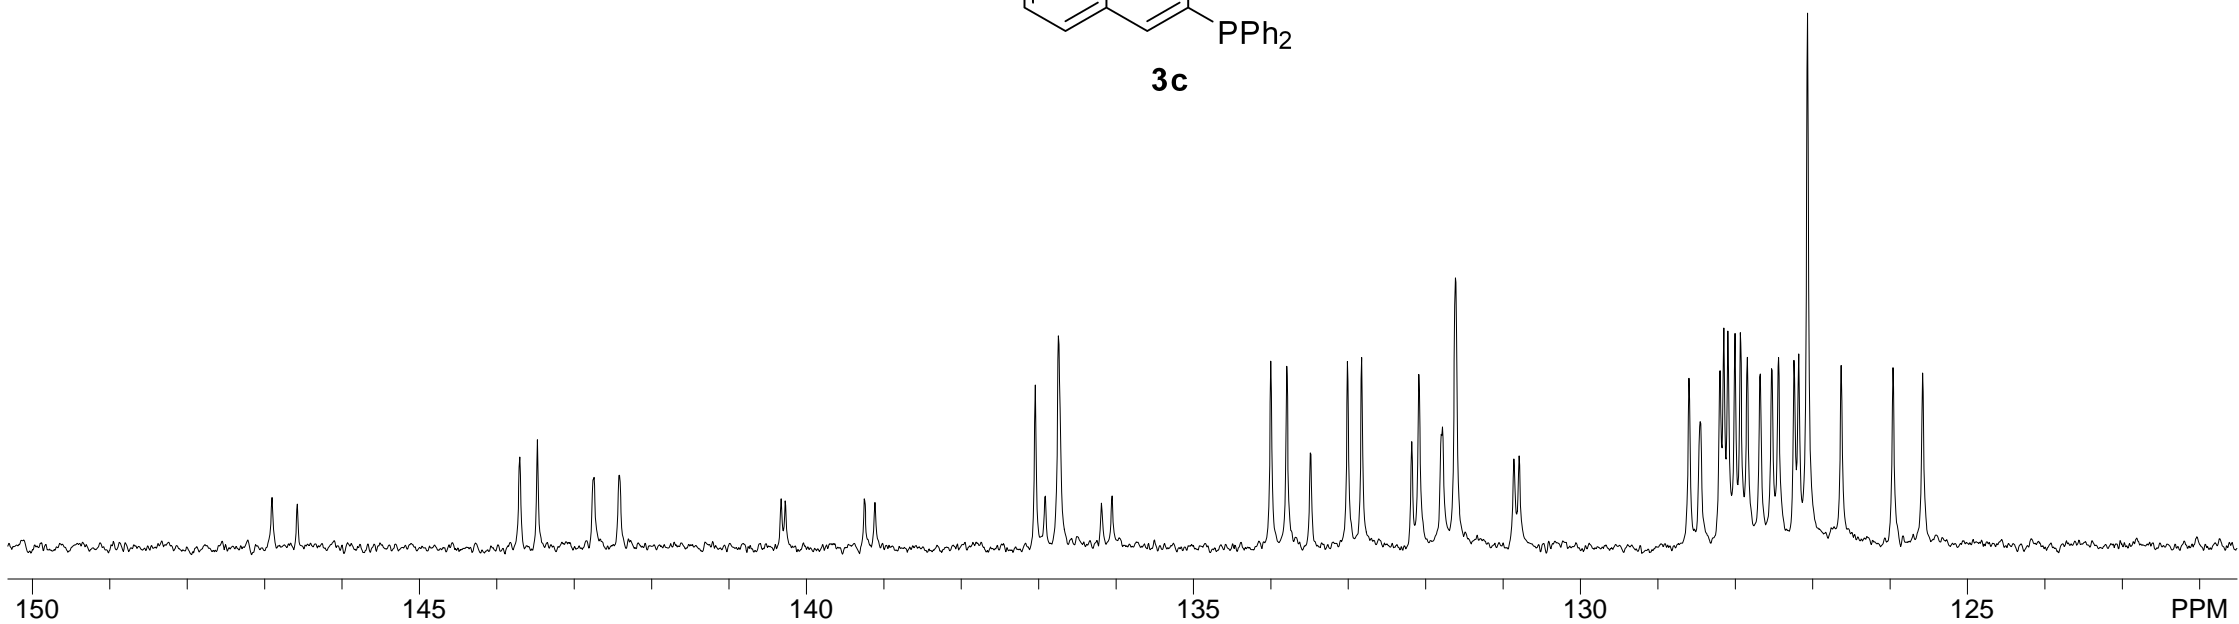

7.784  
7.775  
7.764  
7.743  
7.627  
7.617  
7.603  
7.582  
7.454  
7.451  
7.437  
7.433  
7.417  
7.413  
7.385  
7.382  
7.365  
7.361  
7.344  
7.191  
7.173  
7.139  
7.123  
7.104  
7.075  
7.057  
7.053  
7.024  
7.007  
6.924  
6.907  
6.891  
6.813  
6.800  
6.792  
6.774  
6.760  
6.671  
3.066

2.500  
2.176  
2.098

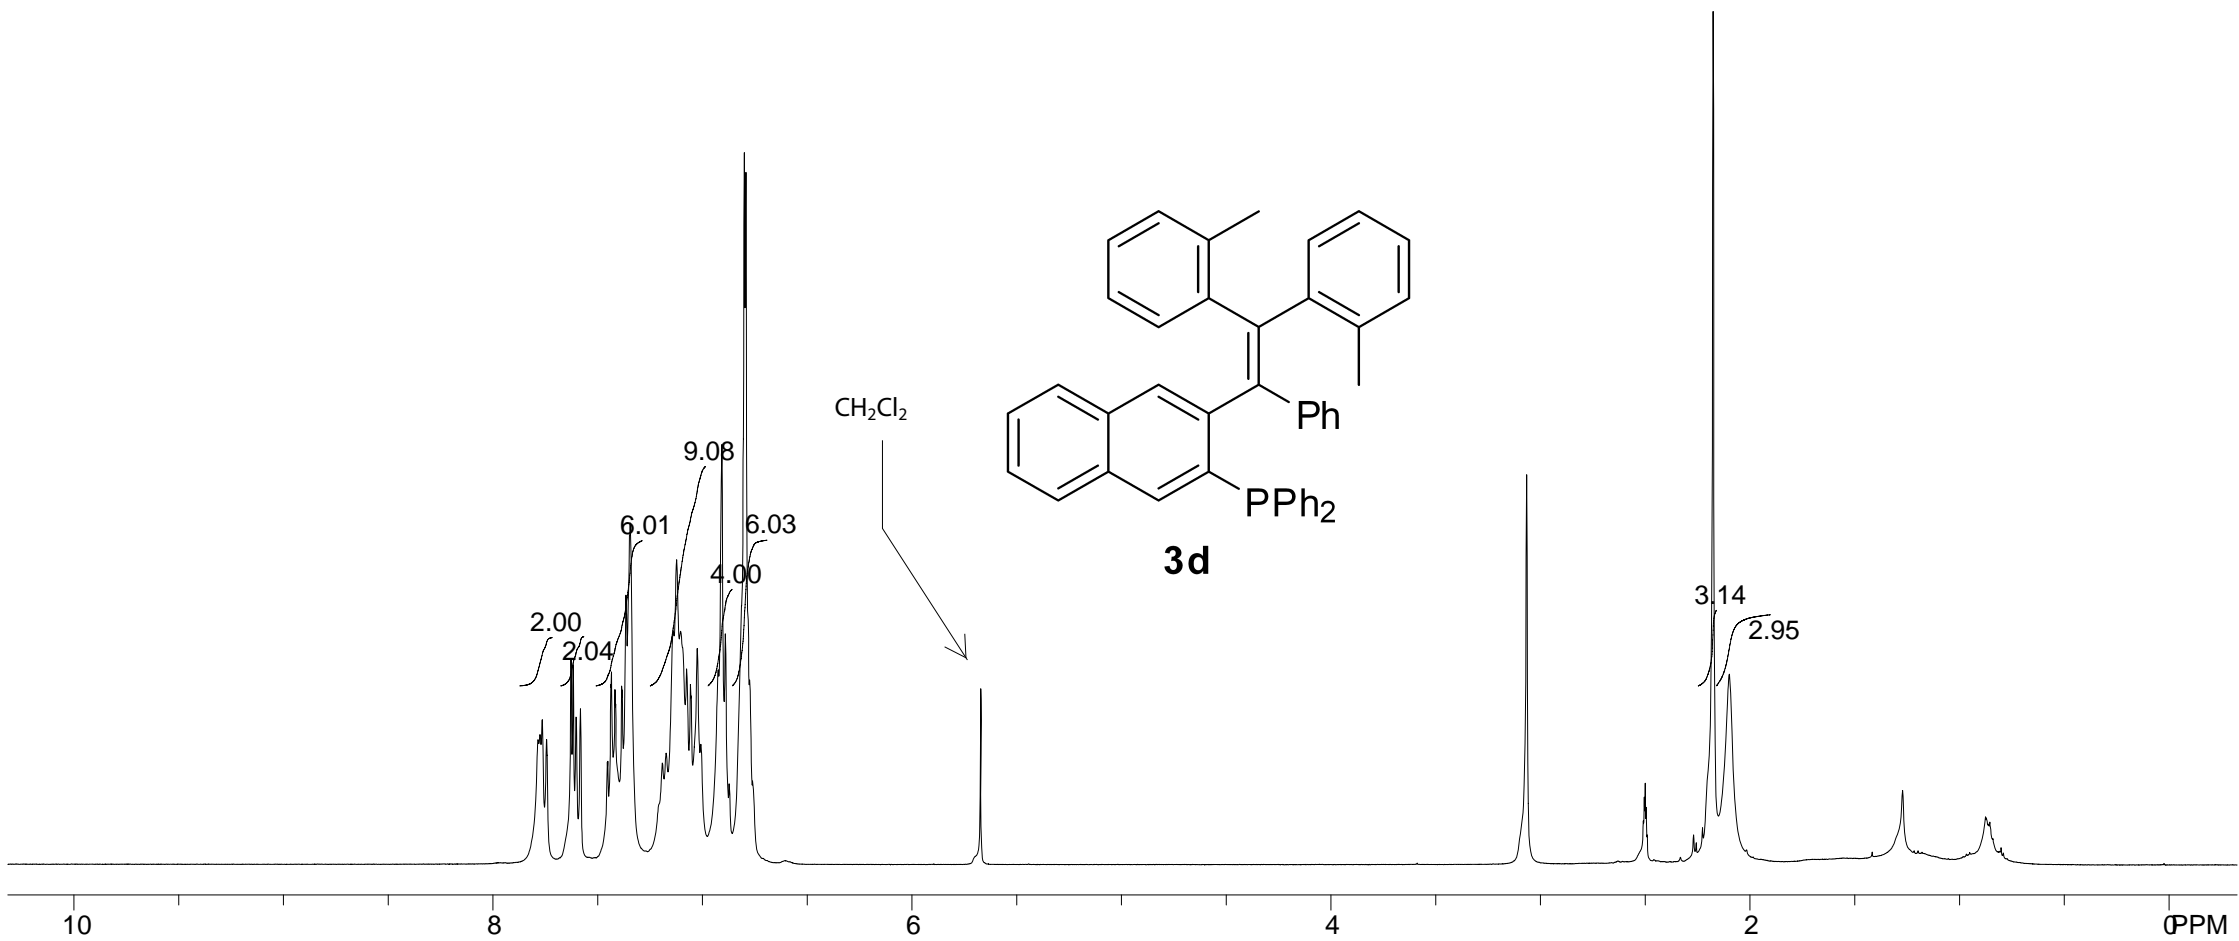

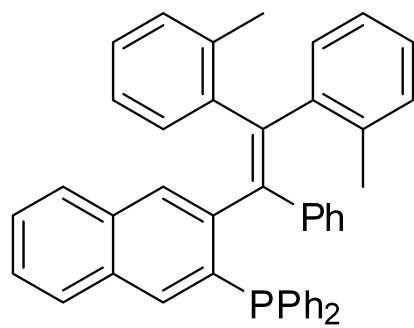

**3d**

13.941

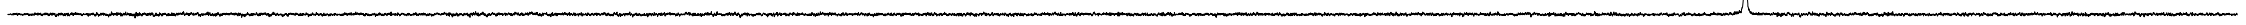

200 150 100 50 0 -50 PPM



145.526  
145.192  
142.349  
141.440  
140.304  
138.199  
138.076  
136.195  
136.051  
135.904  
135.753  
134.959  
134.806  
132.722  
132.548  
132.258  
132.074  
131.312  
131.009  
130.341  
129.666  
129.276  
127.886  
127.840  
127.721  
127.532  
127.471  
127.406  
127.034  
126.890  
126.597  
126.411  
126.312  
126.137  
125.748  
125.624  
124.627  
124.183  
54.170  
40.142  
39.934  
39.720  
39.520  
39.308  
39.096  
38.892  
19.826  
19.681

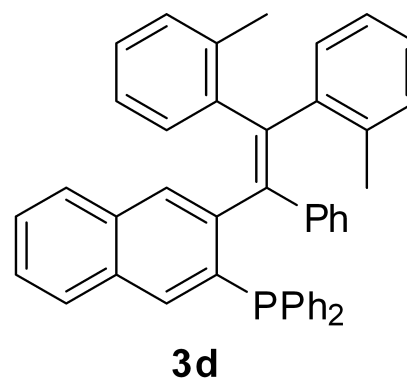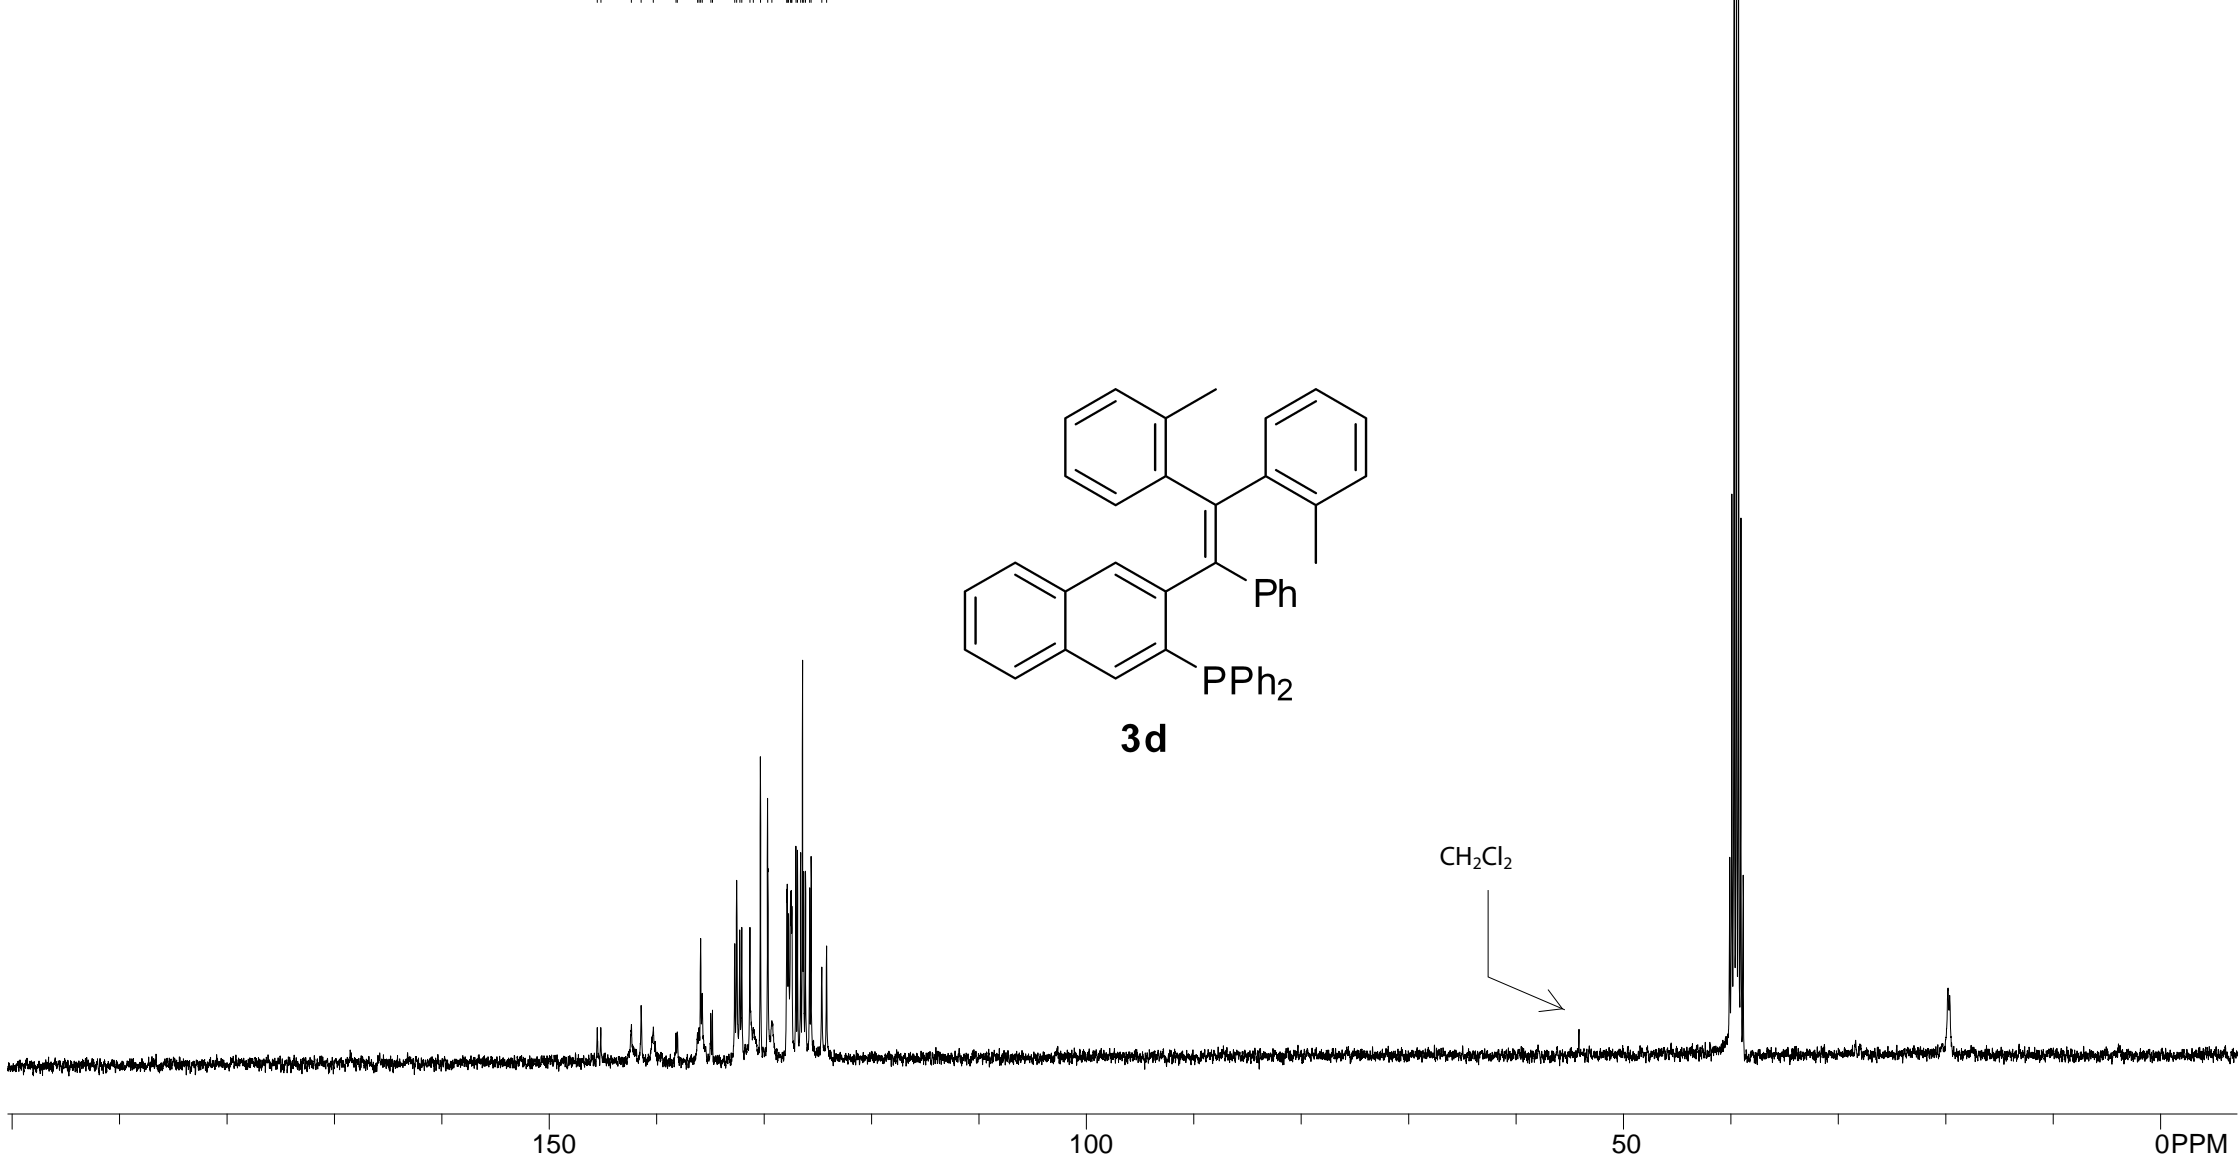

145.526  
145.192

142.349

141.440

140.304

138.199  
138.076

136.195  
136.051  
135.904  
135.753  
134.959  
134.806

132.722  
132.548  
132.258  
132.074  
131.312  
131.009

130.341

129.666

129.276

127.886

127.840

127.721

127.532

127.471

127.406

127.034

126.890

126.597

126.411

126.312

126.137

125.748

125.624  
124.627  
124.183

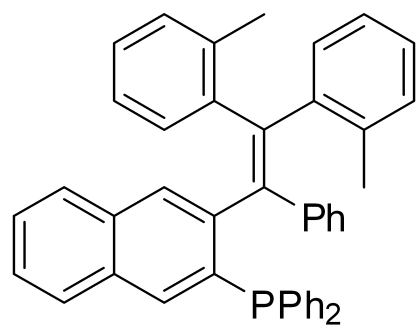

**3d**

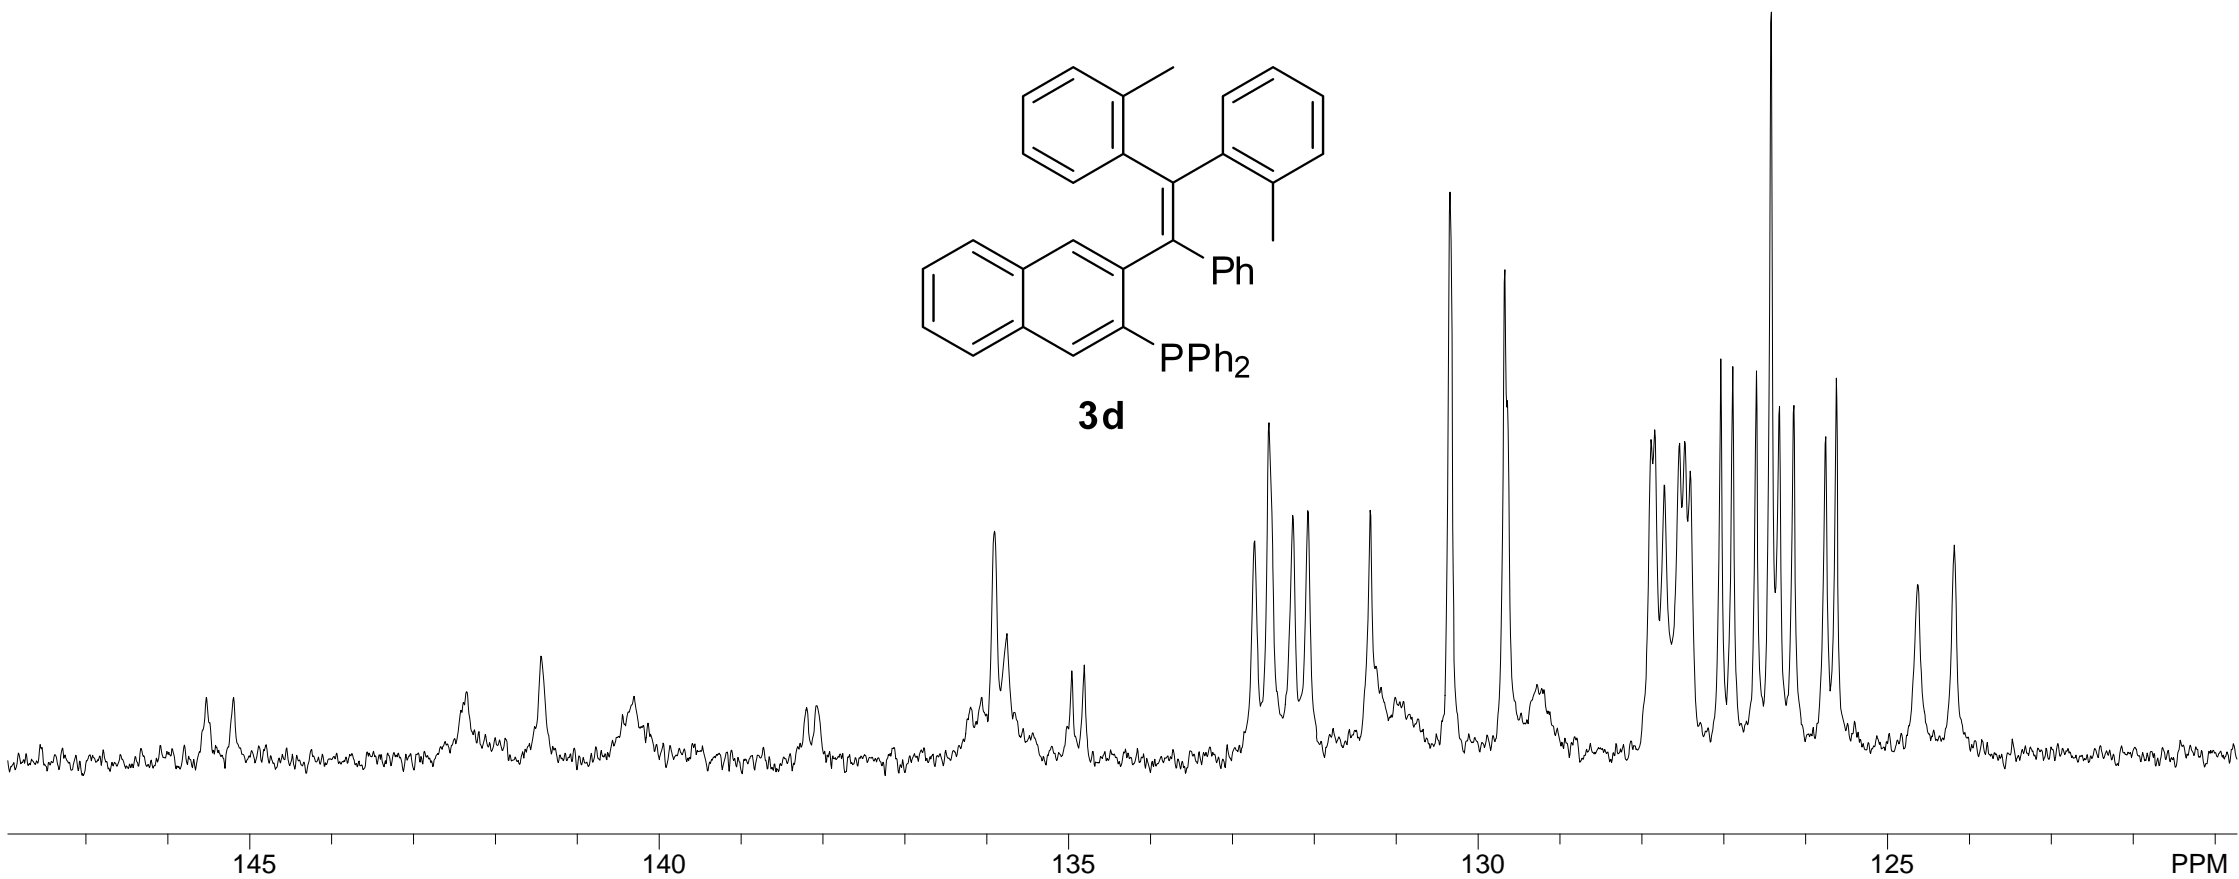

7.658  
7.649  
7.639  
7.566  
7.551  
7.386  
7.369  
7.349  
7.331  
7.313  
7.295  
7.224  
7.212  
7.208  
7.198  
7.185  
7.177  
7.158  
7.145  
7.142  
7.131  
7.128  
7.108  
7.089  
7.072  
7.067  
7.050  
7.042  
7.038  
7.025  
7.020  
6.923  
6.918  
6.913  
6.906  
6.901  
6.898  
6.888  
6.882  
6.810  
6.688  
6.666  
6.469  
6.447  
3.713  
3.628

0.000

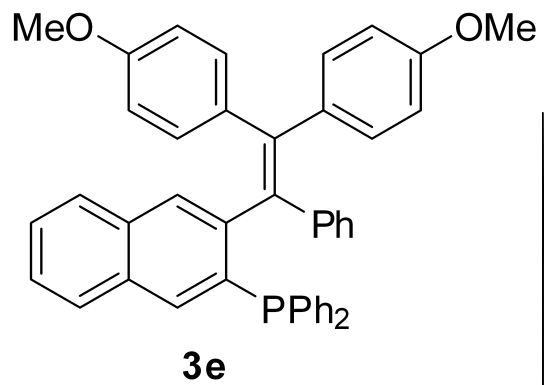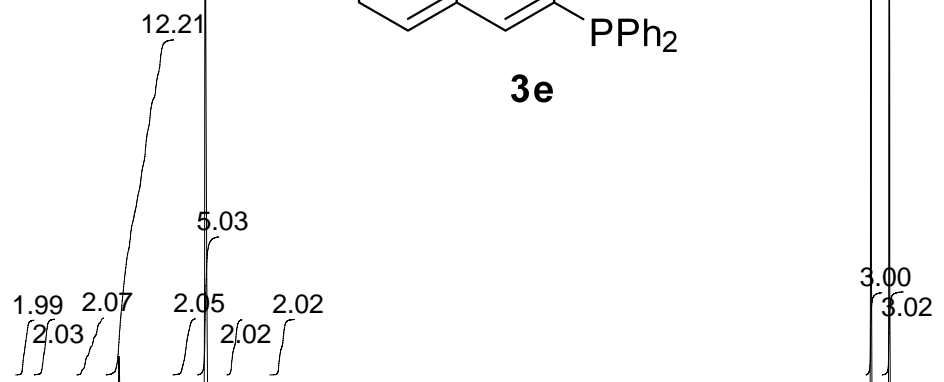

8

6

4

2

PPM

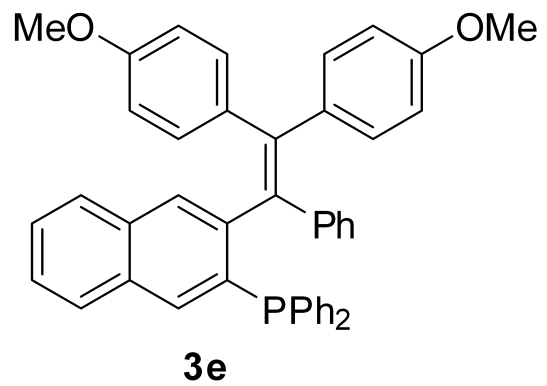

13.692

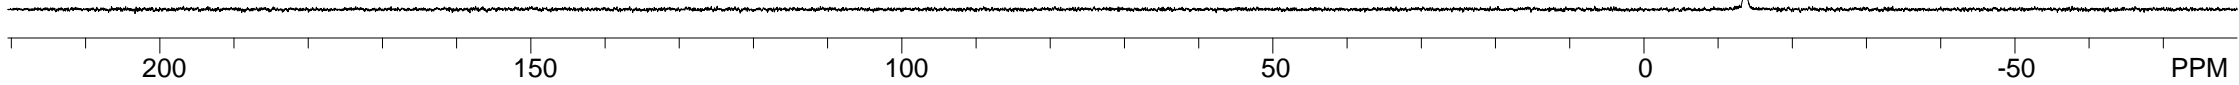

158.235  
157.907  
147.358  
147.034  
143.603  
141.667  
141.655  
139.030  
138.896  
138.596  
138.543  
137.525  
137.383  
136.751  
136.729  
136.375  
136.339  
136.262  
136.122  
134.113  
133.905  
133.593  
133.026  
132.846  
132.796  
132.751  
132.179  
131.548  
130.980  
130.916  
128.304  
128.137  
128.094  
128.071  
128.051  
127.865  
127.618  
127.516  
127.236  
126.625  
125.709  
125.570  
113.098  
112.708  
77.326  
77.000  
76.688  
55.049  
54.956

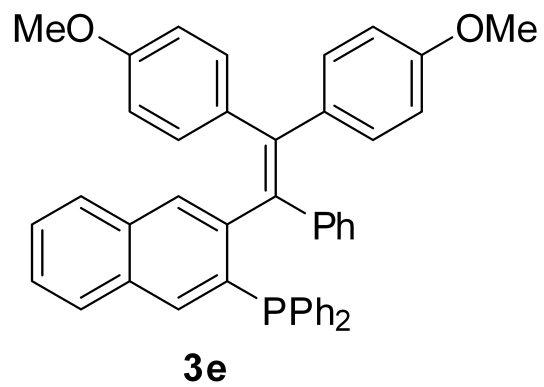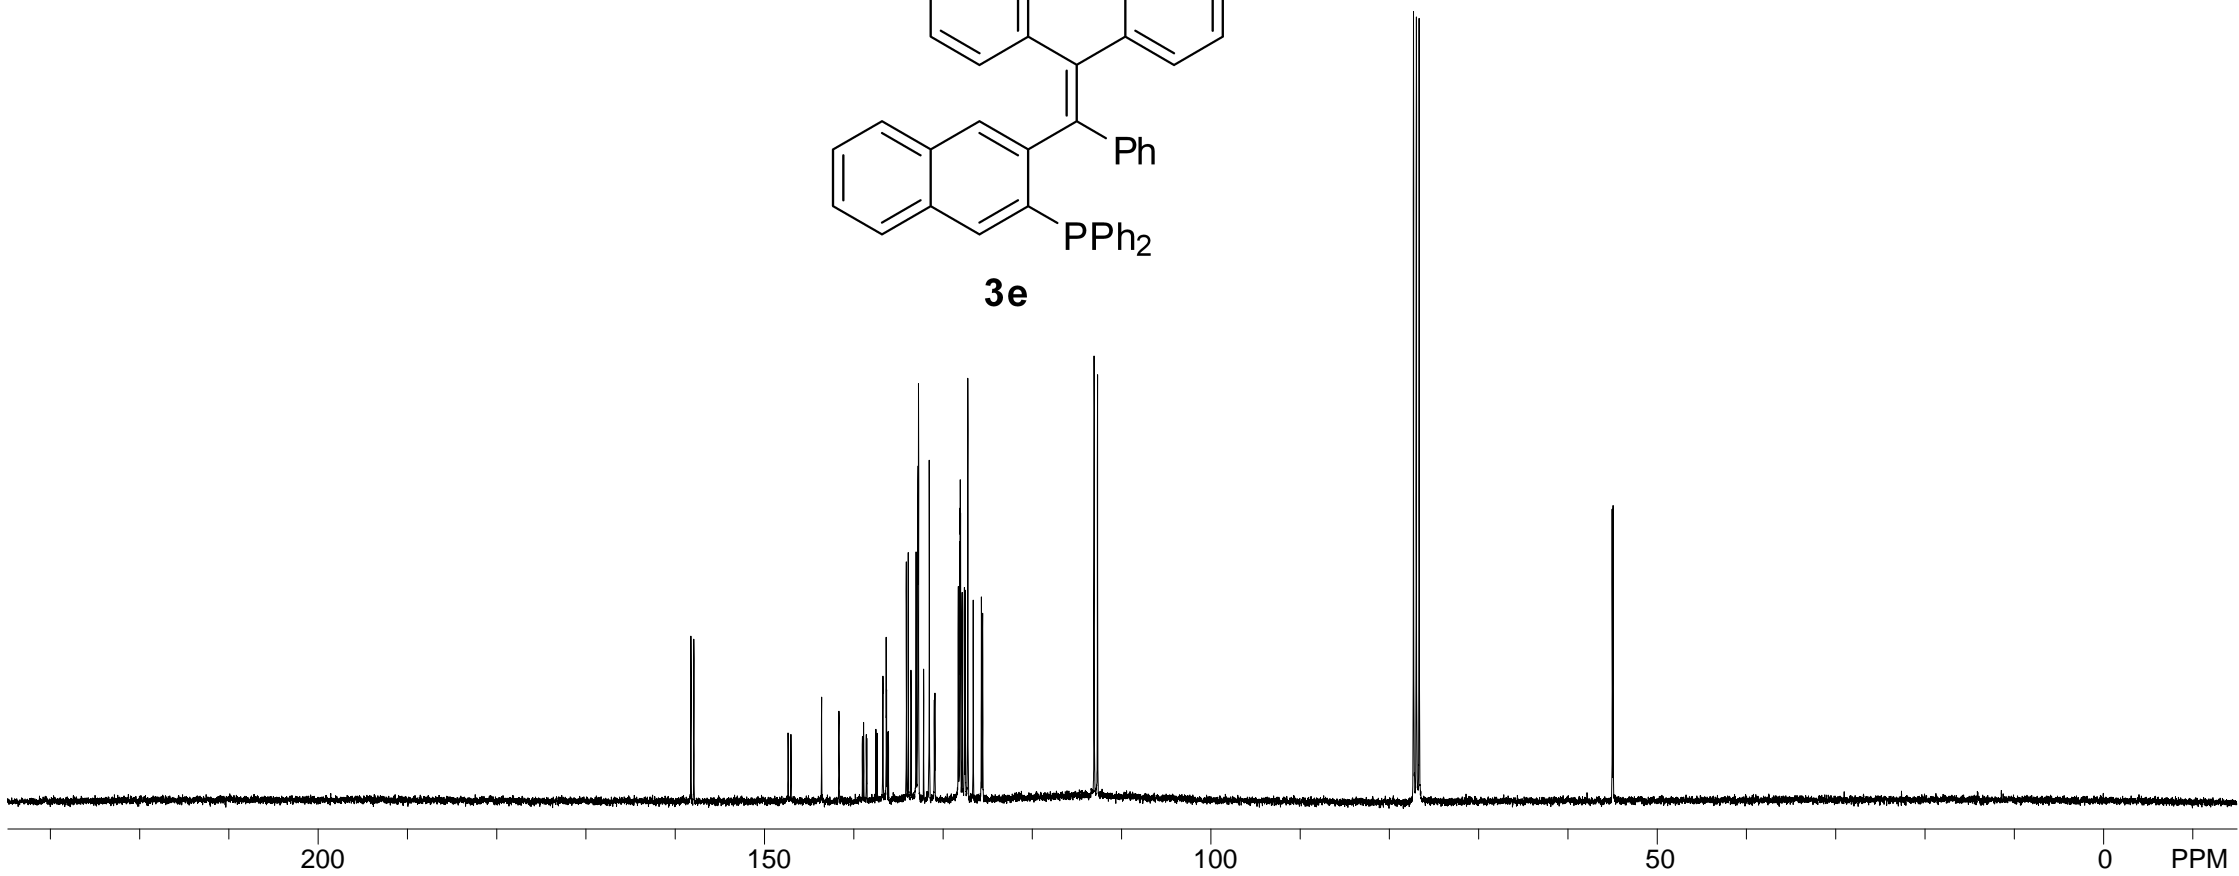

158.235  
157.907

147.358  
147.034

141.667  
141.655  
143.603

139.030  
138.896  
138.596

138.543  
137.525  
137.383

136.751  
136.729  
136.375

136.339  
136.262  
136.122

134.113  
133.905  
133.593

133.026  
132.846  
132.796

132.751  
132.179  
131.548

130.980  
130.916  
128.304

128.137  
128.094  
128.071

128.051  
127.865  
127.618

127.516  
127.236  
126.625

125.709  
125.570

113.098  
112.708

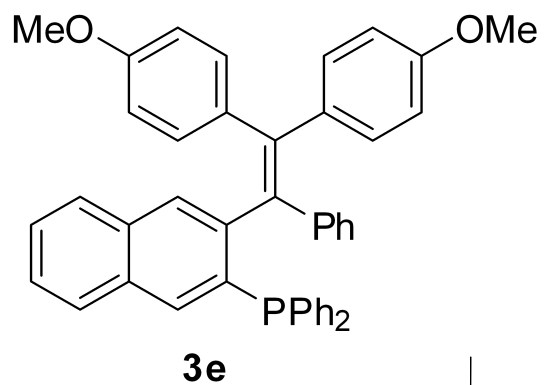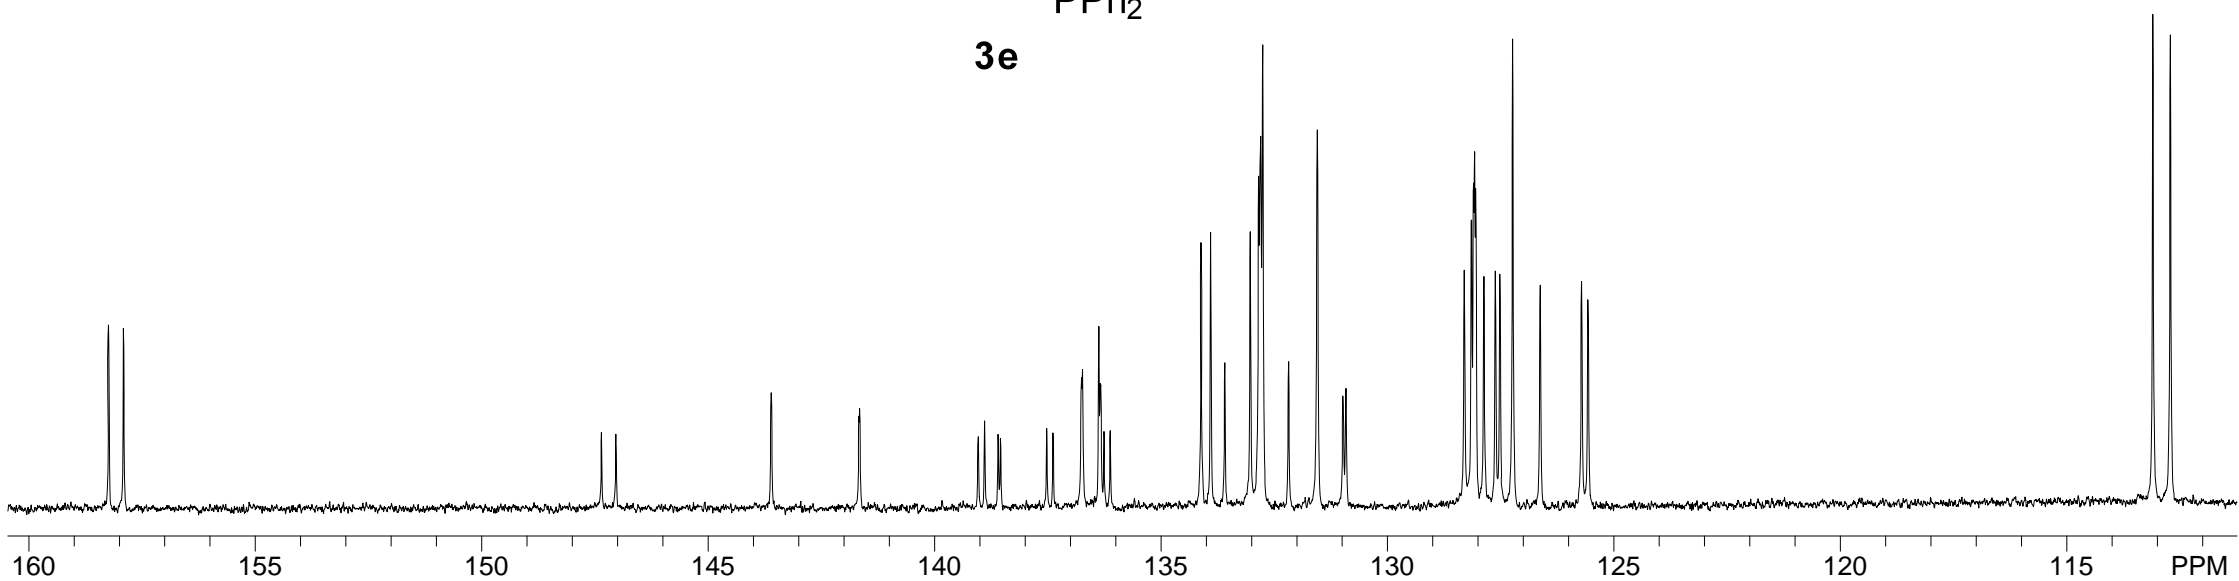

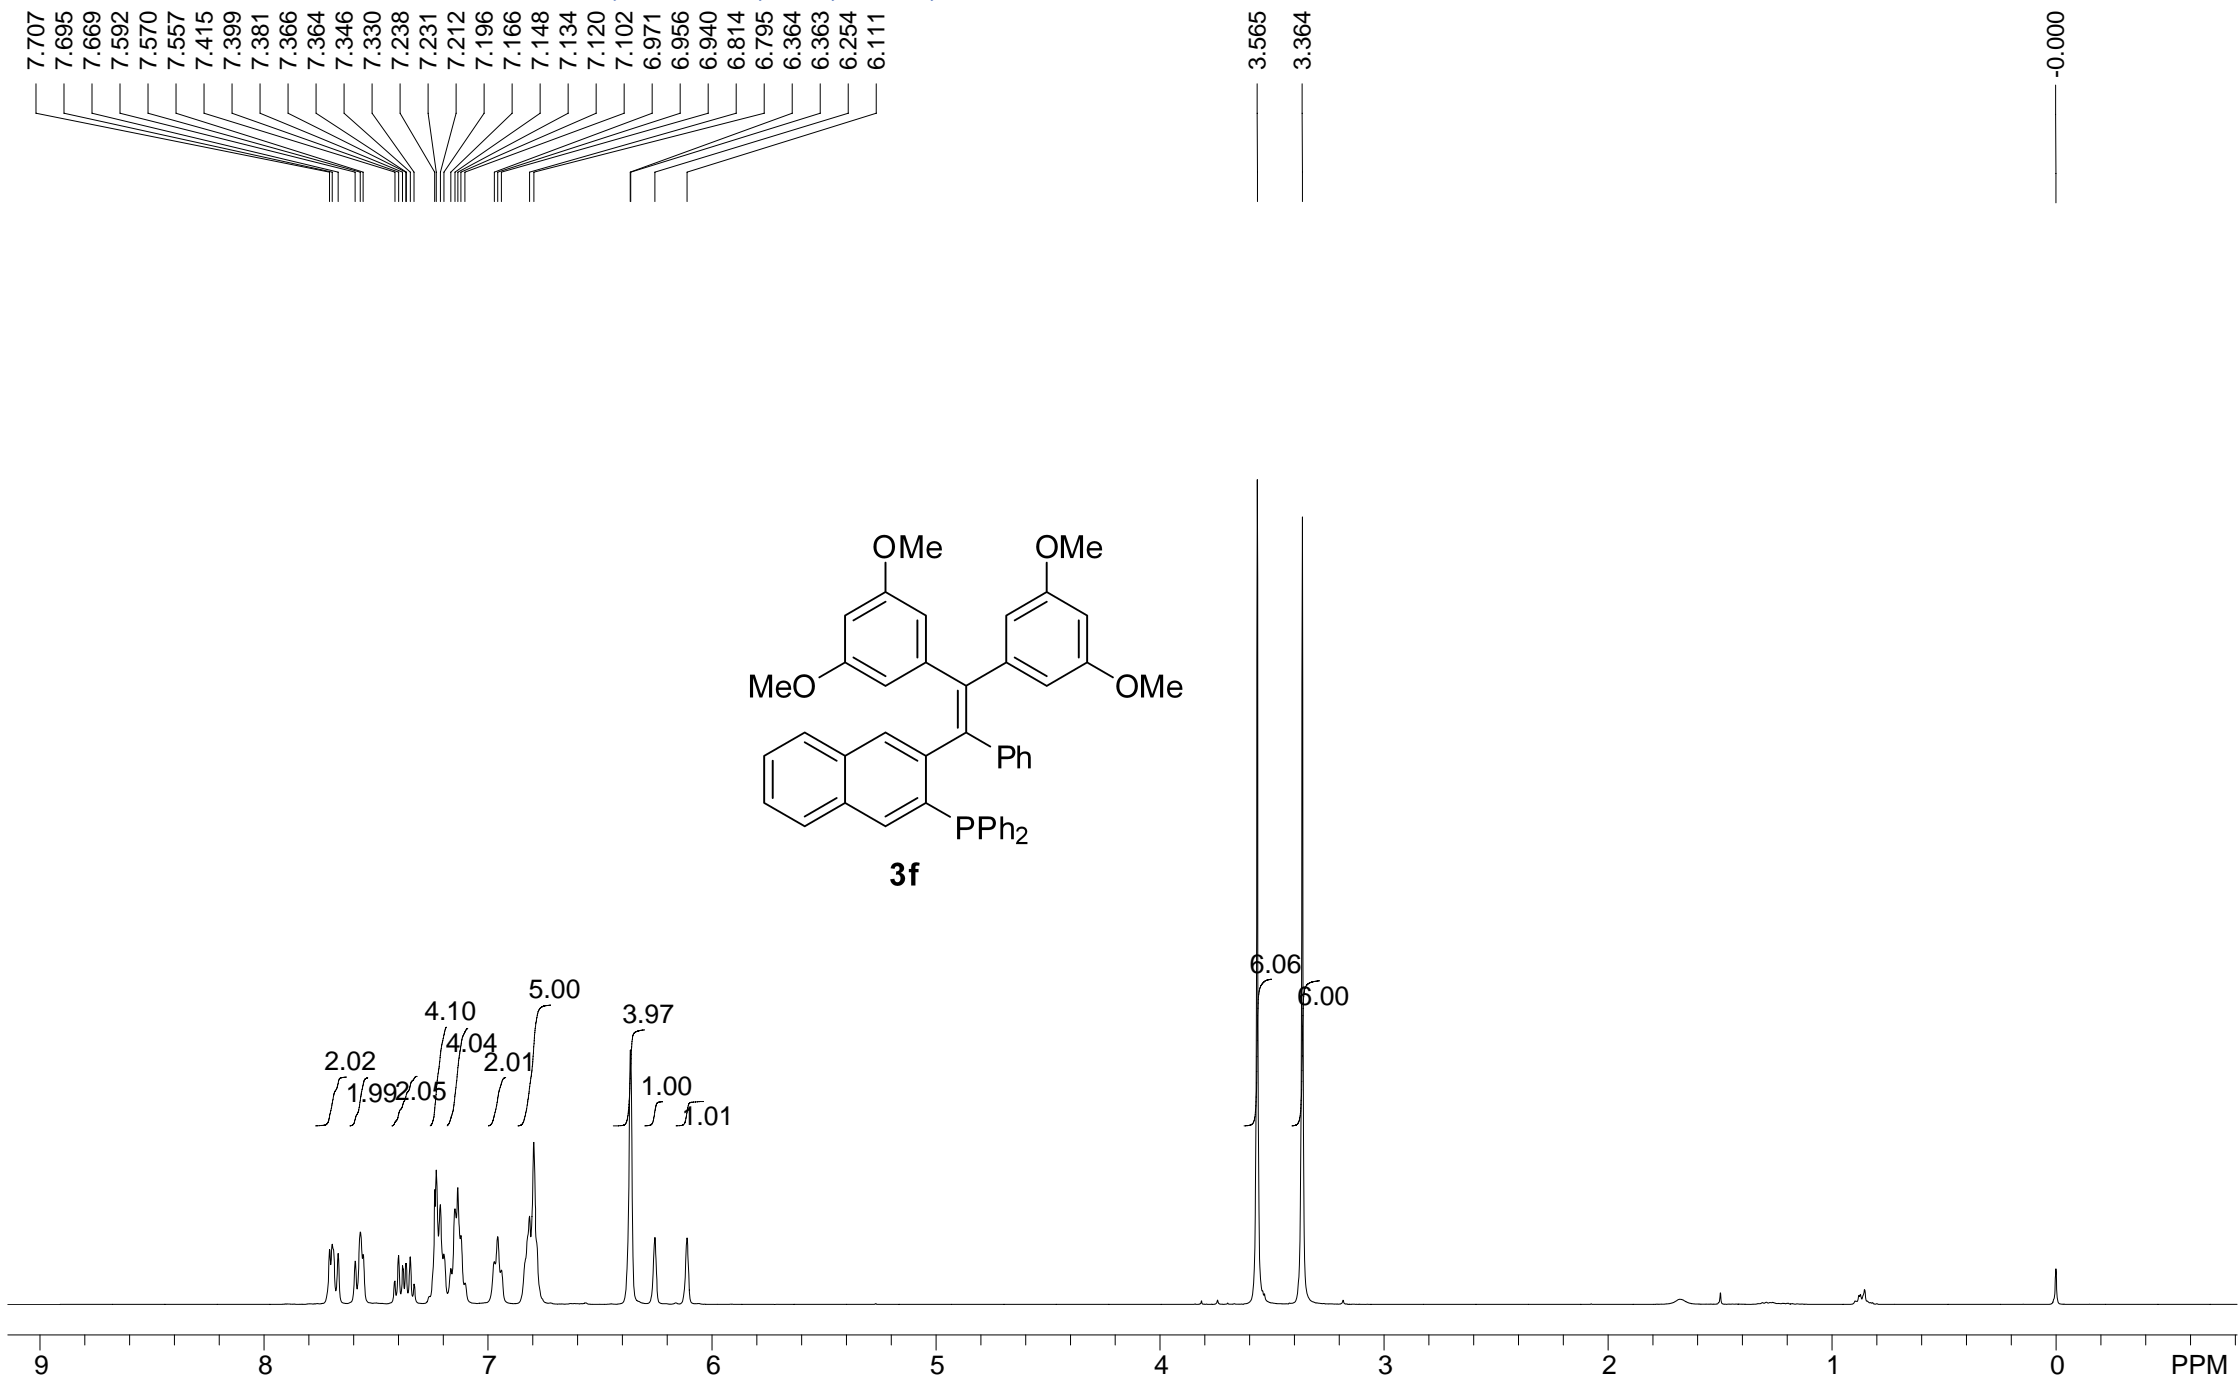

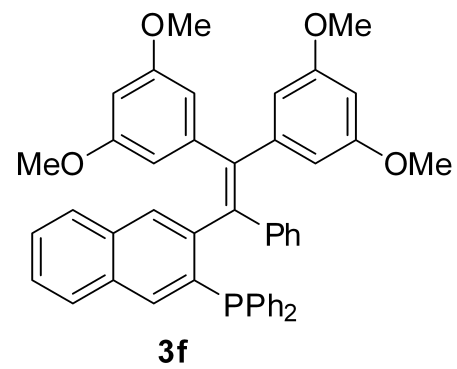

13.846

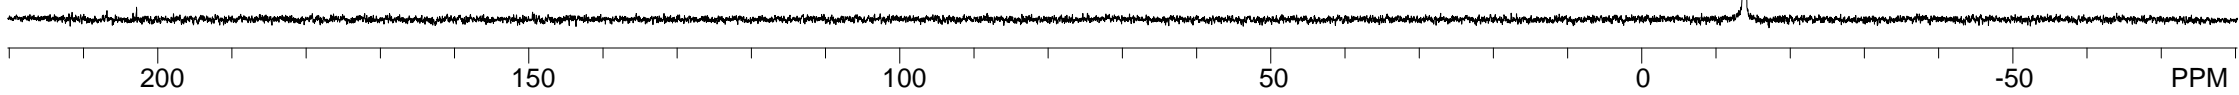



159.951  
159.633  
146.500  
146.185  
145.037  
144.930  
142.766  
142.139  
140.516  
140.473  
138.964  
138.824  
137.125  
136.990  
136.501  
136.032  
135.896  
134.232  
134.016  
133.432  
133.031  
132.849  
132.243  
131.157  
130.465  
130.407  
128.365  
128.116  
128.073  
128.001  
127.880  
127.684  
127.397  
127.208  
126.778  
126.171  
125.732  
109.733  
109.635  
99.506  
99.292  
77.324  
77.000  
76.691  
55.183  
55.023

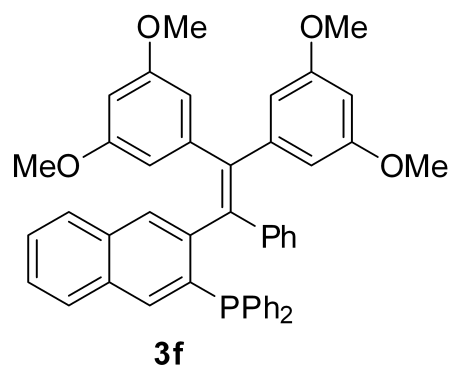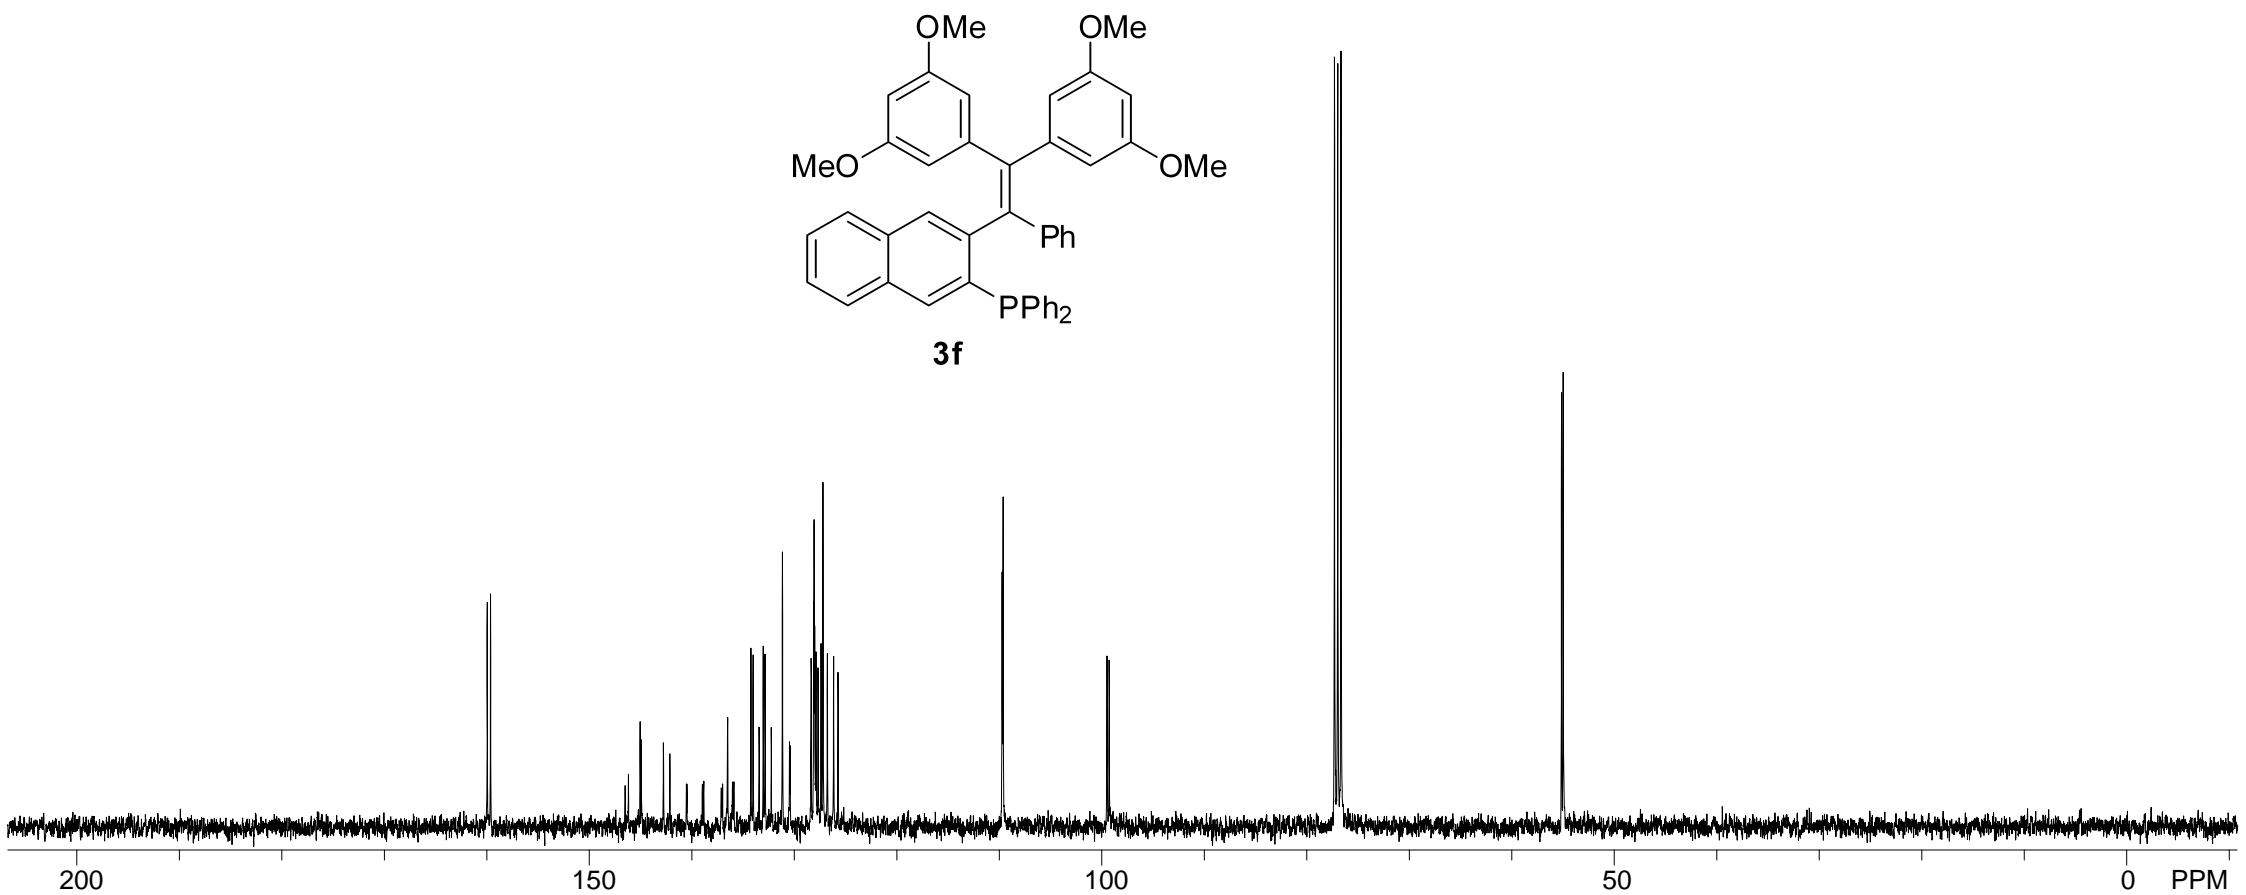

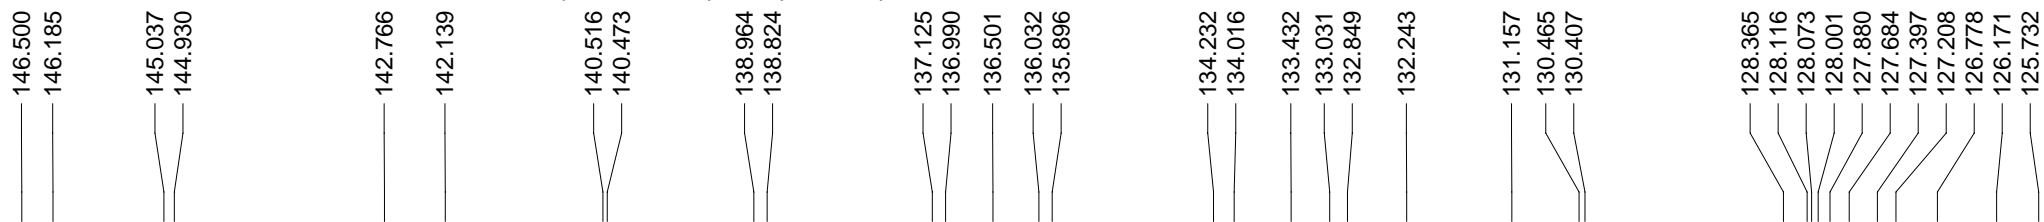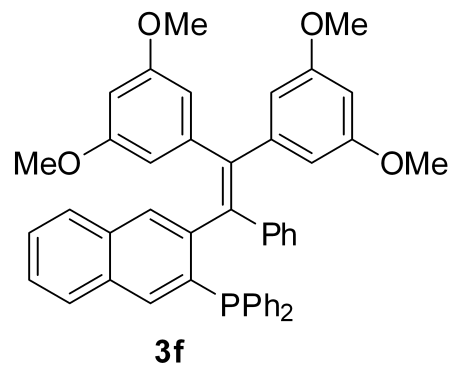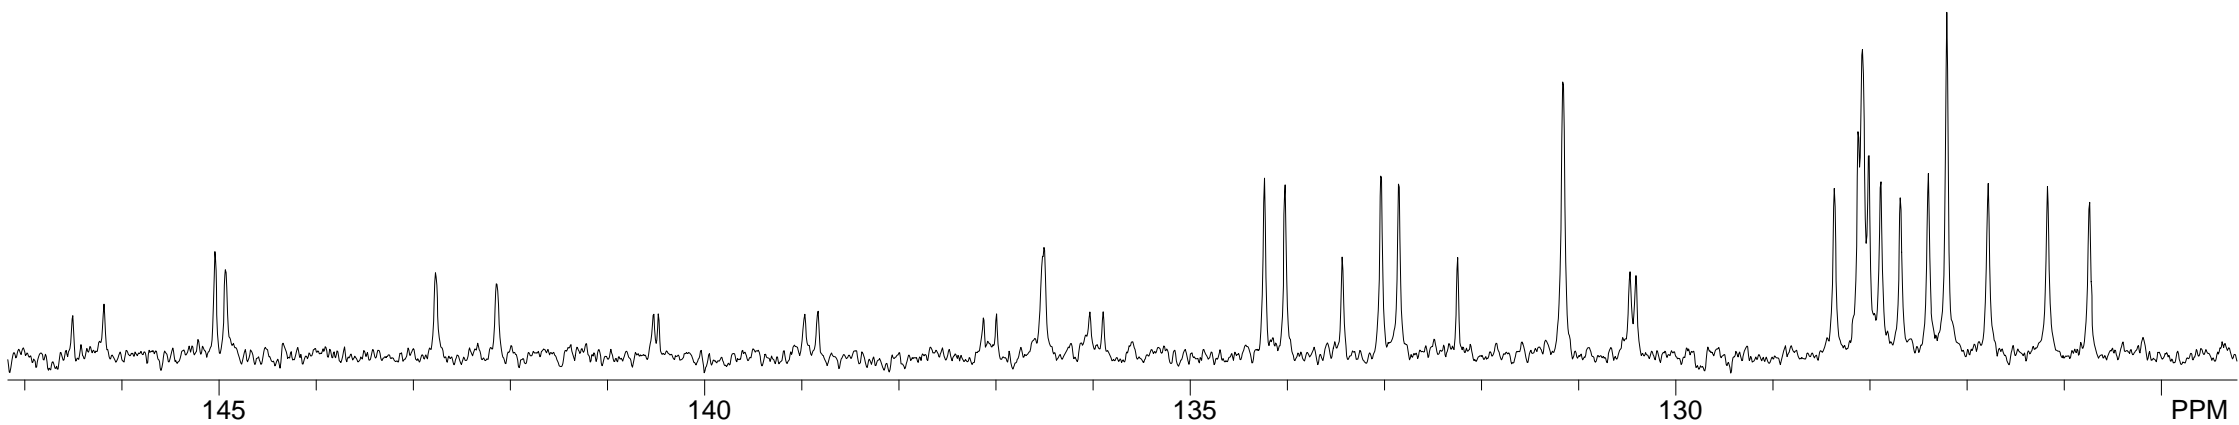

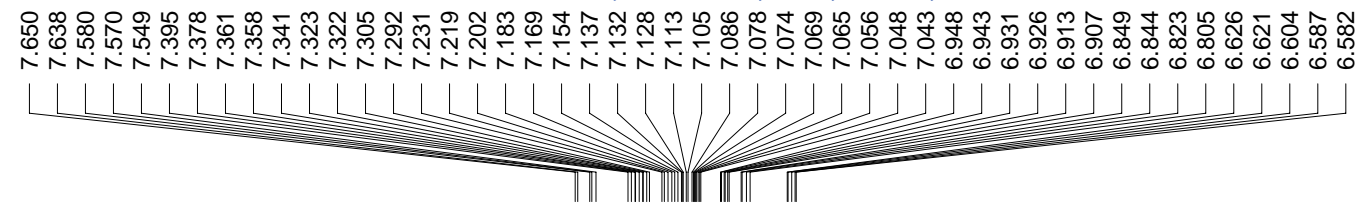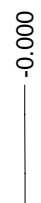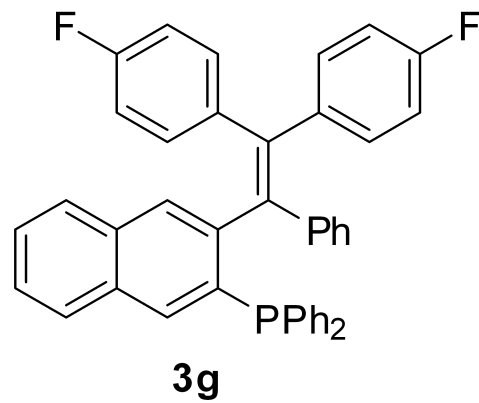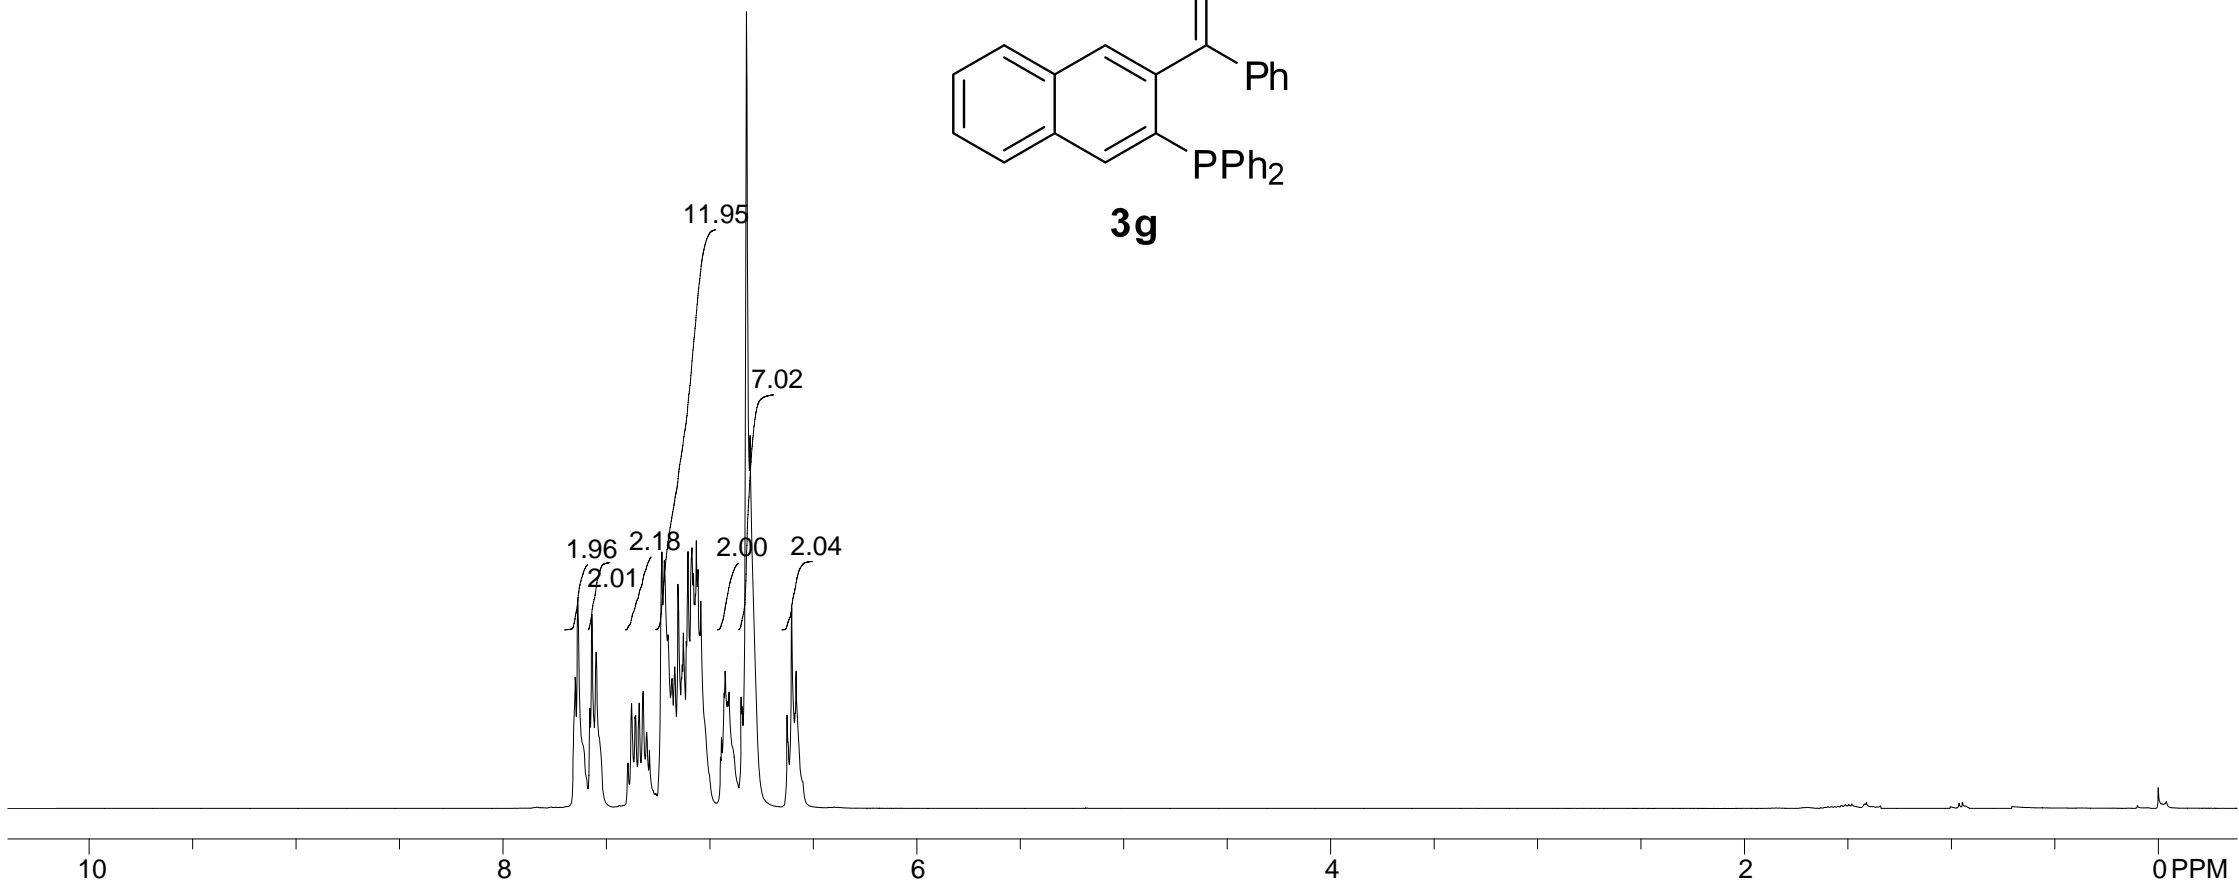

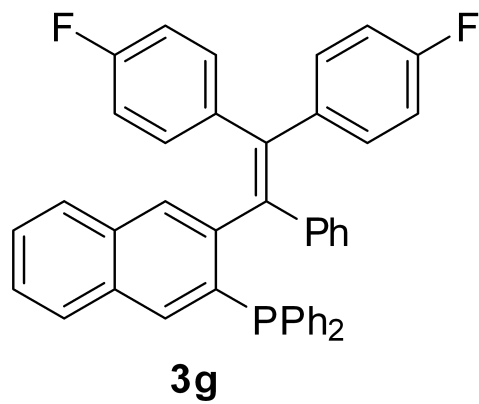

13.761

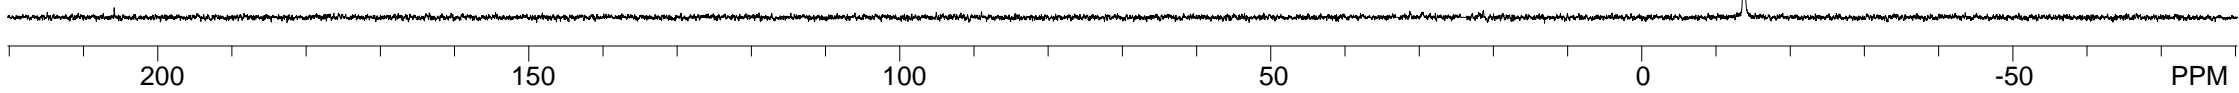

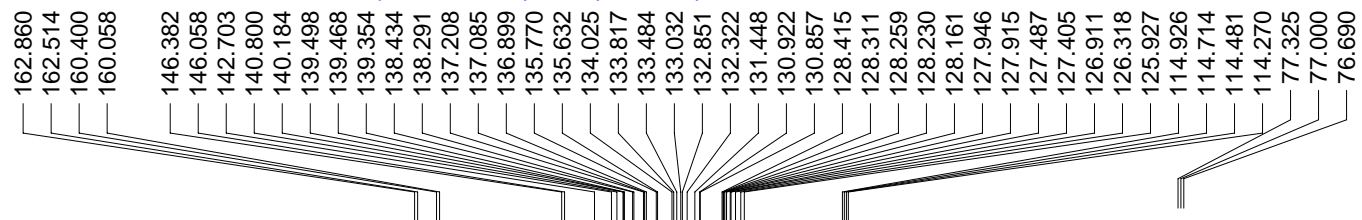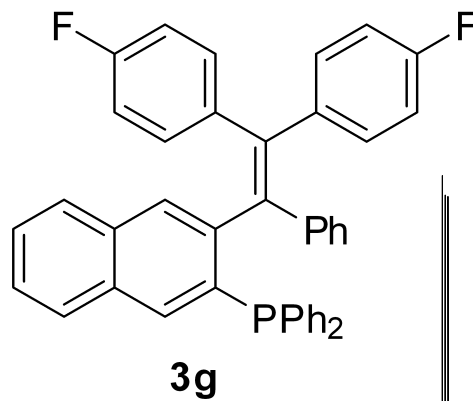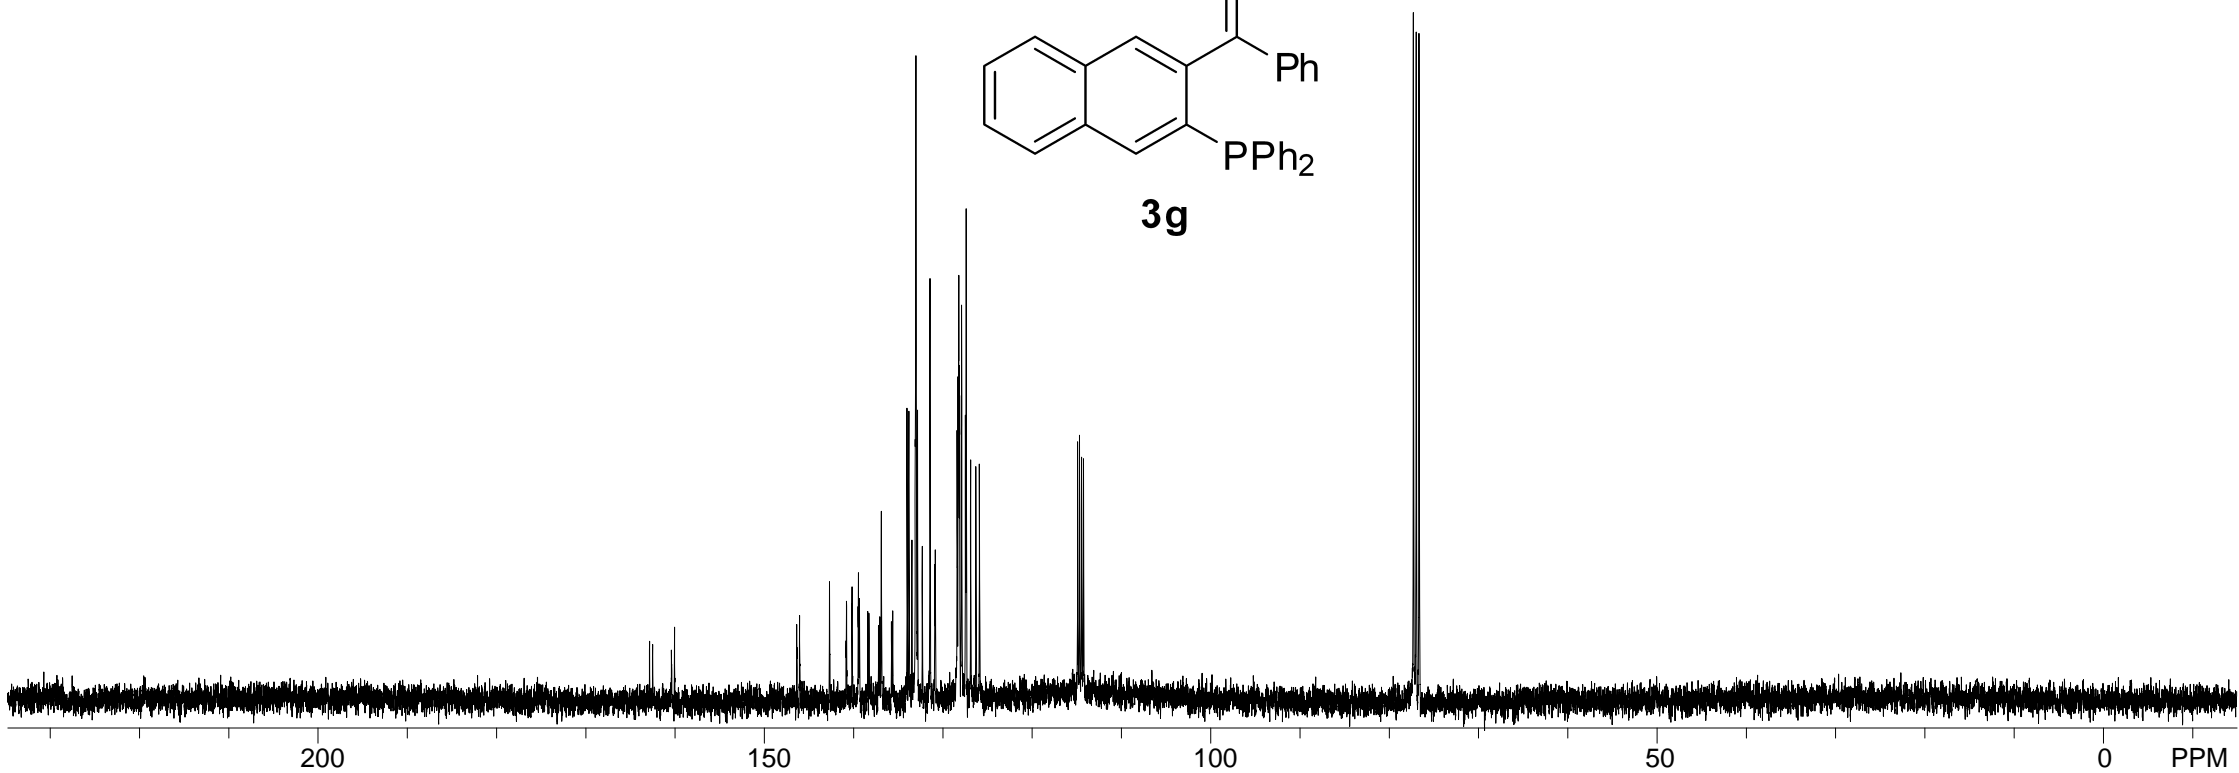

162.860  
162.514

160.400  
160.058

146.382  
146.058

140.800  
140.184  
142.703

139.498  
139.468  
139.354

138.434  
138.291  
137.208

137.085  
136.899  
135.770

135.632  
134.025  
133.817

133.484  
133.032  
132.851

132.322  
131.448  
130.922

130.857  
128.415  
128.311

128.259  
128.230  
128.161

127.946  
127.915  
127.487

127.405  
126.911  
126.318

125.927  
114.926  
114.714

114.481  
114.270

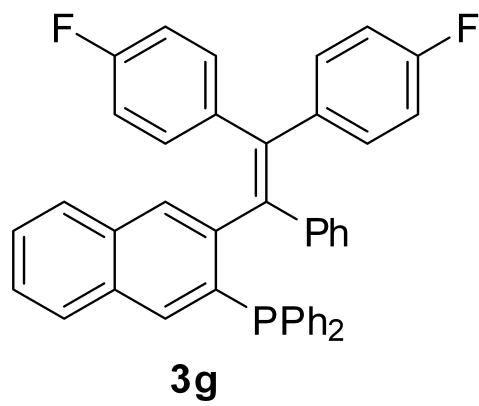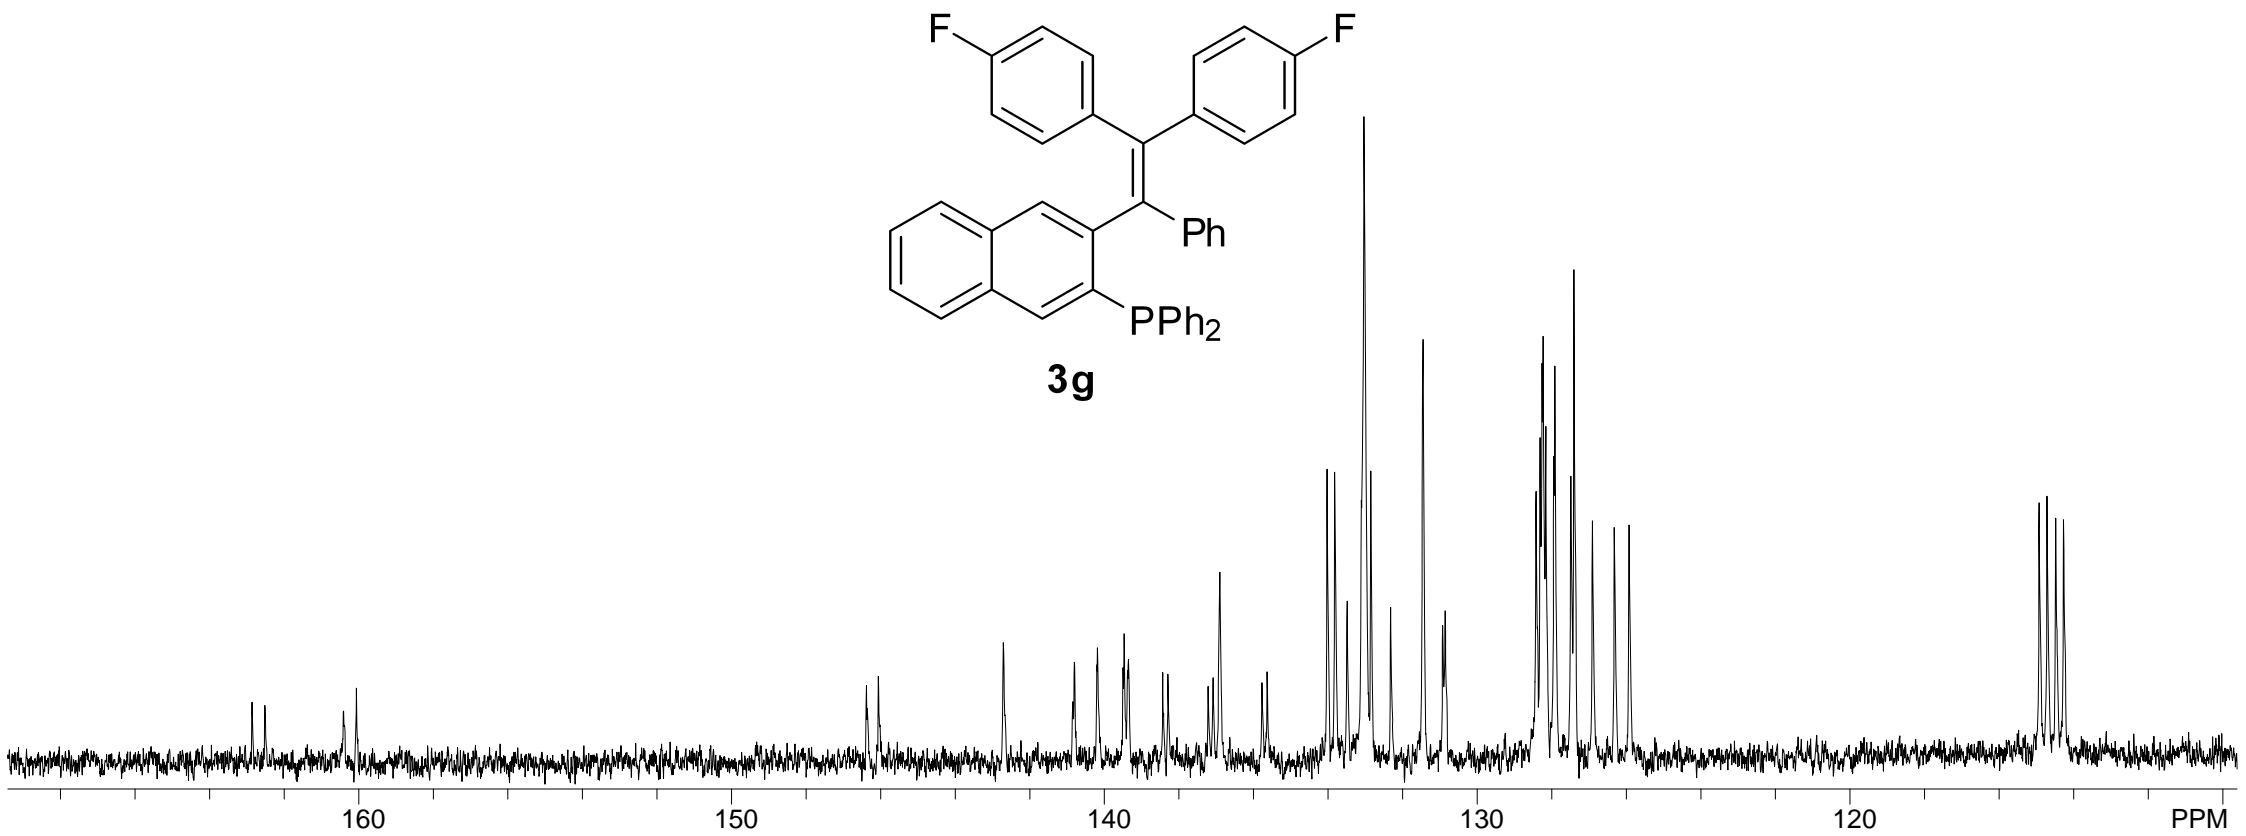

7.687  
7.667  
7.636  
7.611  
7.590  
7.568  
7.445  
7.427  
7.408  
7.395  
7.376  
7.358  
7.325  
7.298  
7.263  
7.238  
7.212  
7.193  
7.176  
7.158  
7.137  
7.115  
7.081  
7.006  
7.000  
6.995  
6.986  
6.890  
6.886  
6.868  
6.825

0.000

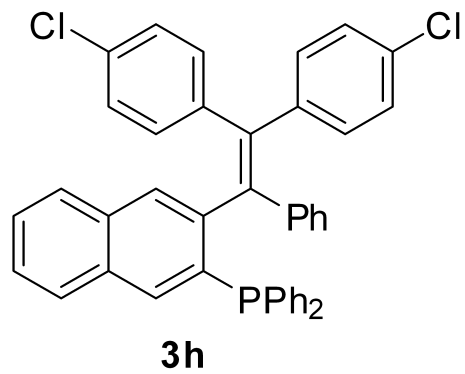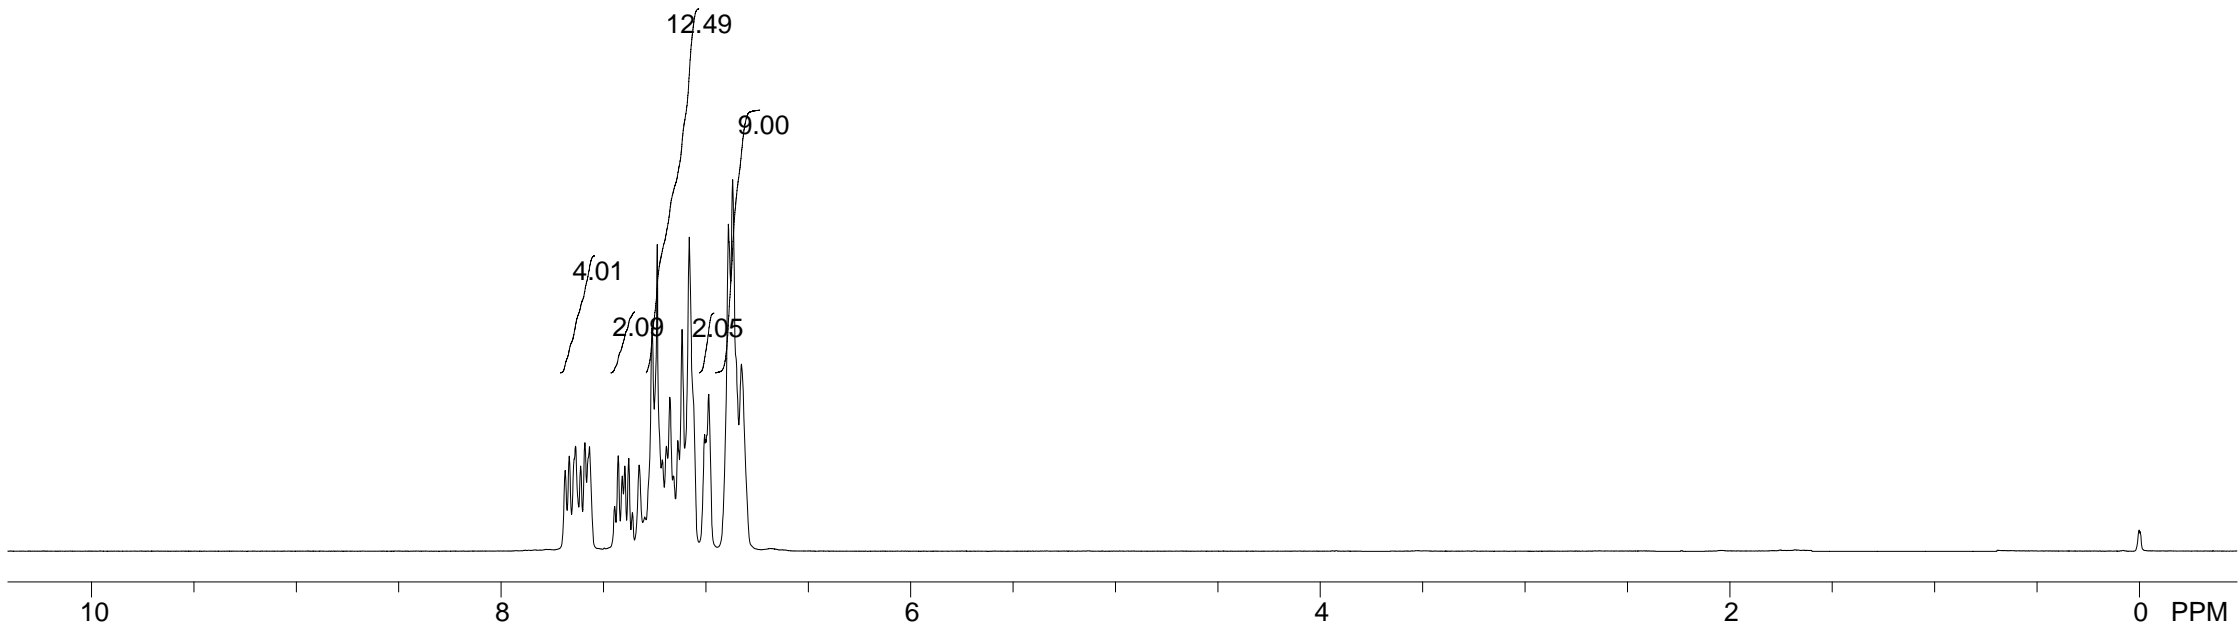

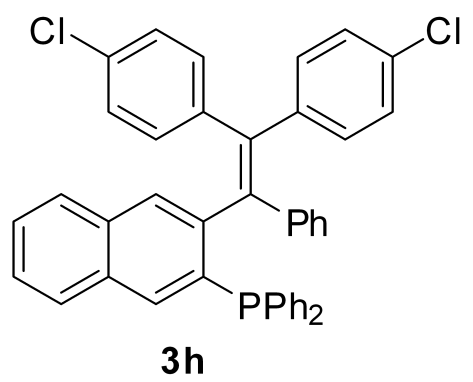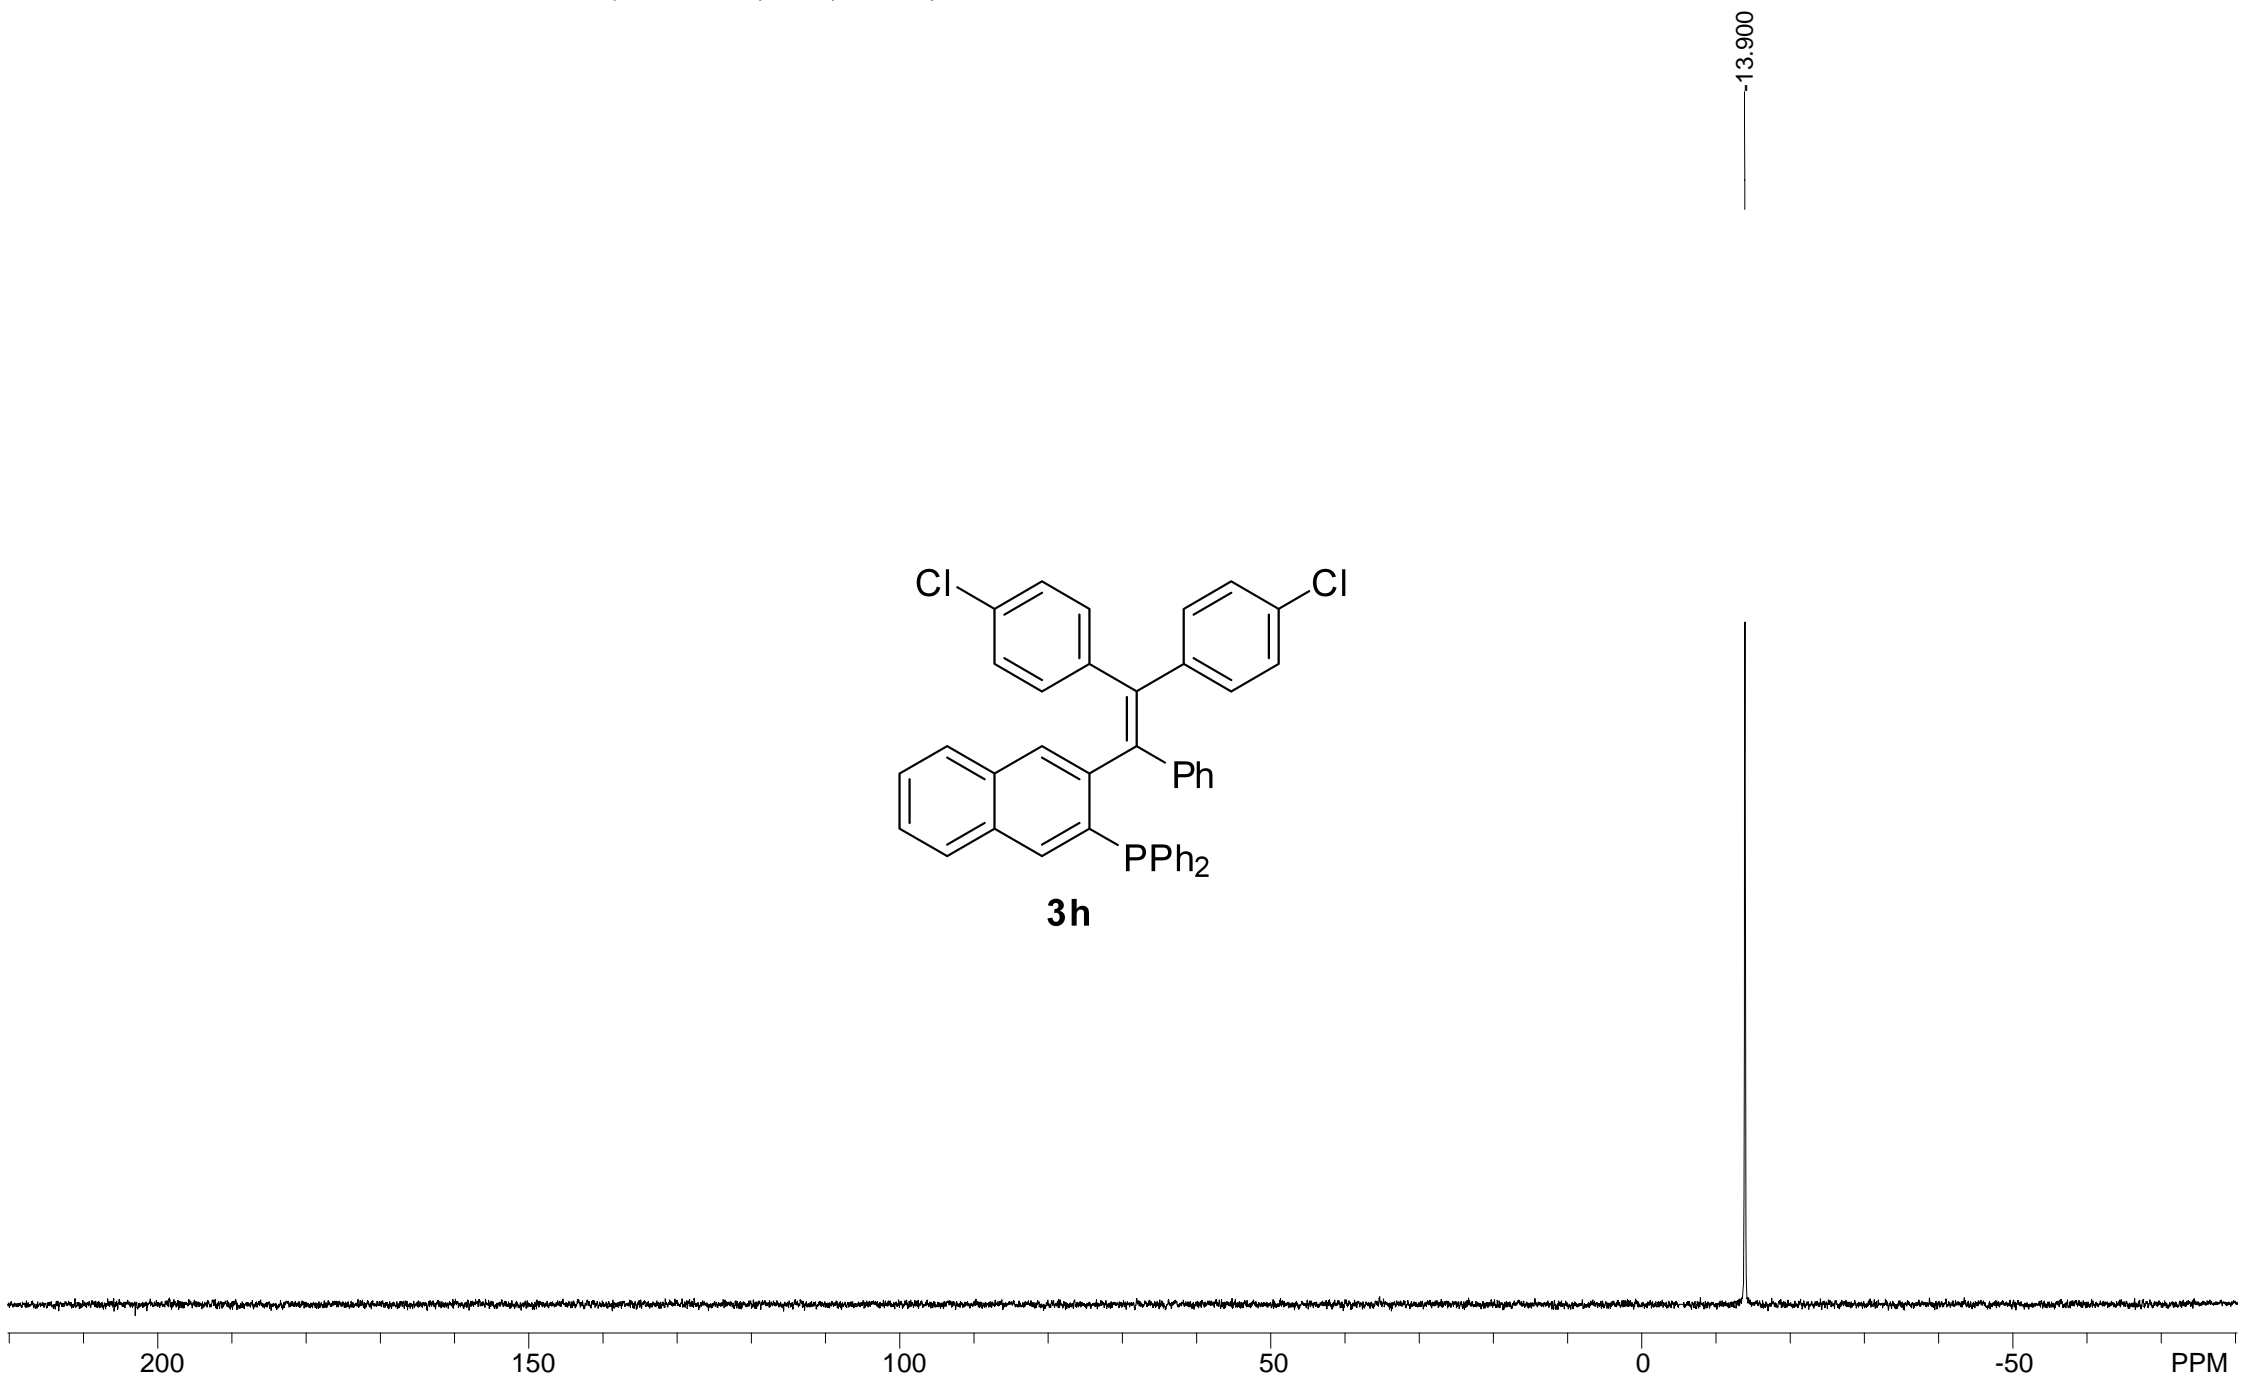



146.086  
145.760  
142.442  
141.808  
141.562  
139.799  
138.180  
138.049  
137.129  
137.004  
135.551  
135.414  
133.964  
133.813  
133.755  
133.621  
133.417  
132.945  
132.803  
132.758  
132.713  
132.577  
132.331  
131.380  
130.844  
130.789  
128.695  
128.506  
128.442  
128.339  
128.276  
128.235  
128.158  
128.116  
127.965  
127.904  
127.655  
127.533  
127.477  
126.965  
126.524  
126.019  
77.325  
77.219  
77.000  
76.689

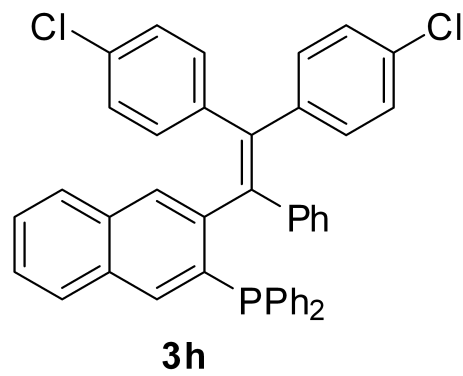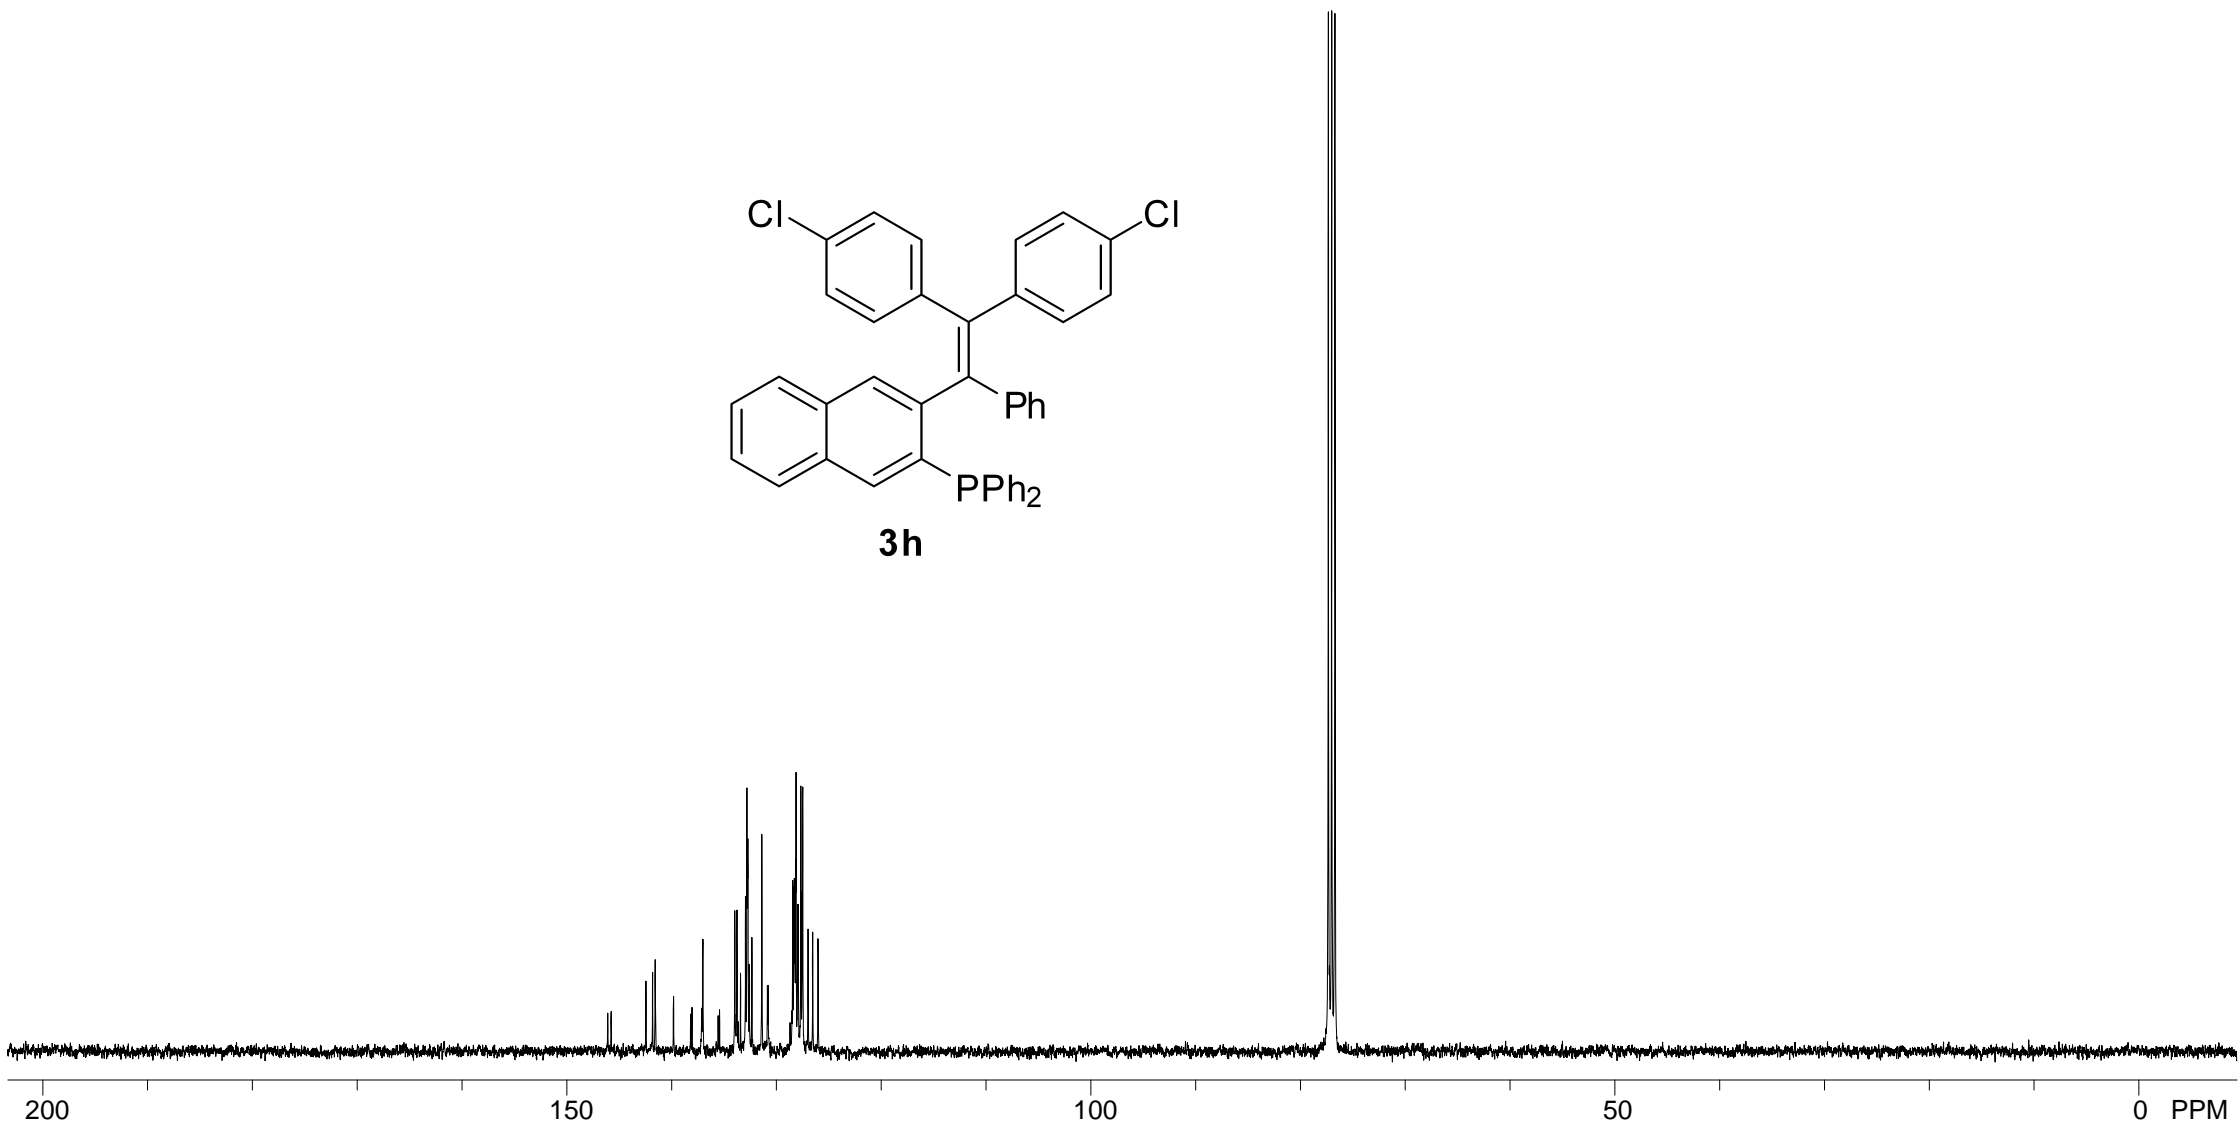

146.086  
145.760

142.442  
141.808  
141.562

139.799

138.180  
138.049  
137.129  
137.004

135.551  
135.414

133.964  
133.813  
133.755  
133.621  
133.417  
132.945  
132.803  
132.758  
132.713  
132.577  
132.331  
131.380  
130.844  
130.789

128.695  
128.506  
128.442  
128.339  
128.276  
128.235  
128.158  
128.116  
127.965  
127.904  
127.655  
127.533  
127.477  
126.965  
126.524  
126.019

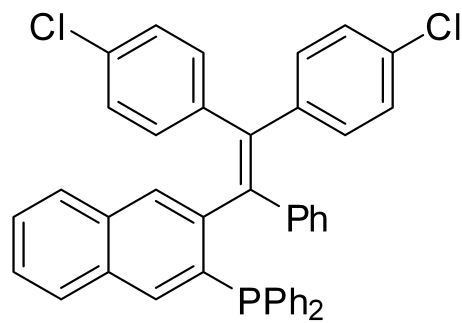

**3h**

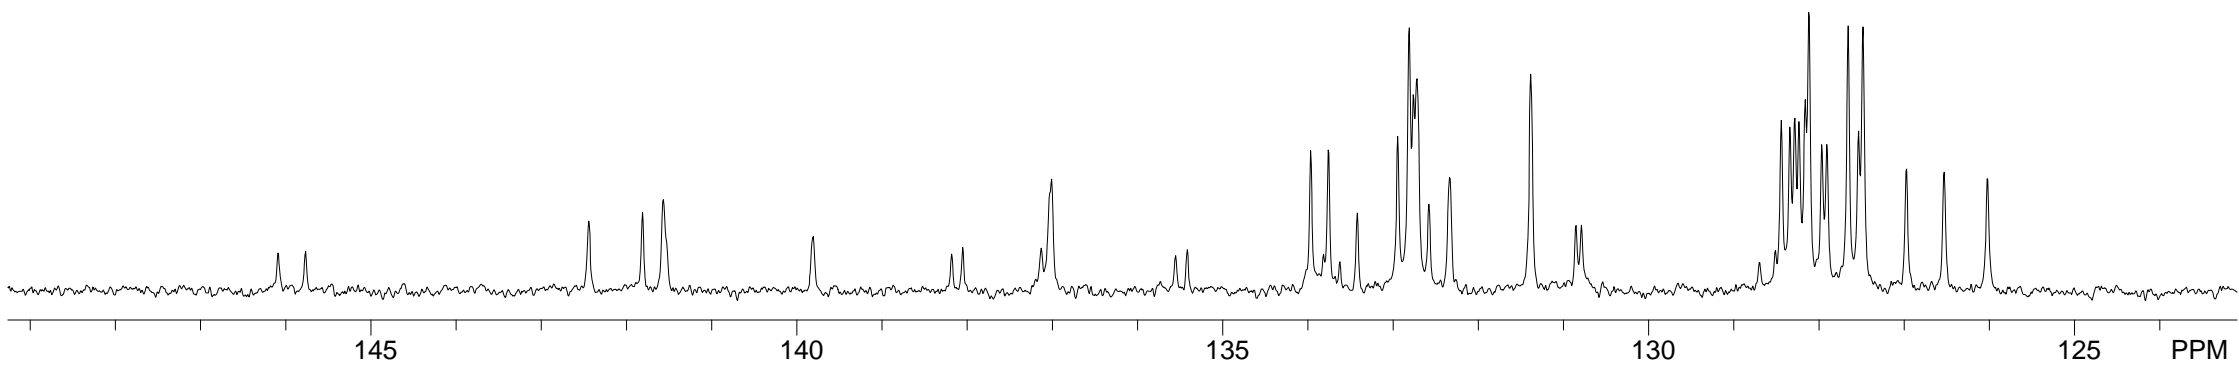

7.688  
7.668  
7.639  
7.629  
7.615  
7.594  
7.571  
7.561  
7.431  
7.412  
7.400  
7.380  
7.286  
7.265  
7.243  
7.233  
7.215  
7.196  
7.179  
7.160  
7.103  
7.083  
7.066  
7.039  
7.019  
6.999  
6.933  
6.913  
6.887  
6.871  
6.853  
6.840  
6.833  
6.820  
6.803

0.000

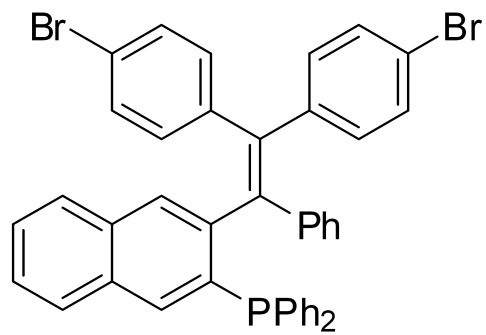

**3i**

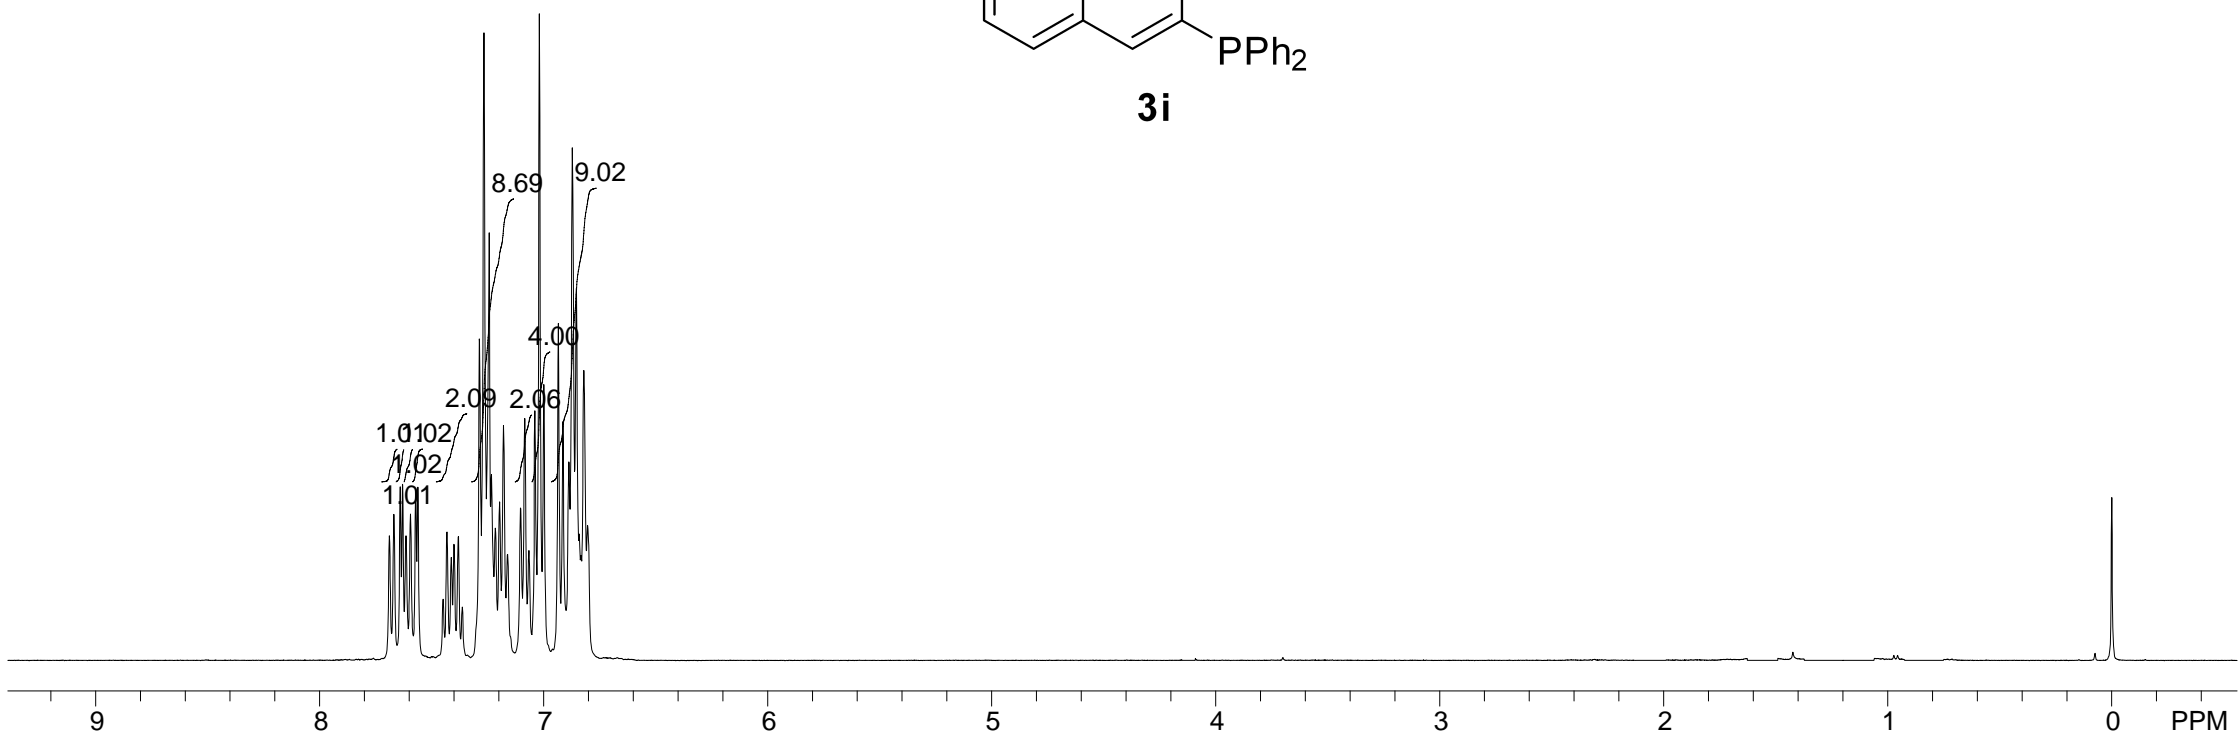

7.688

7.668

7.639

7.629

7.615

7.594

7.571

7.561

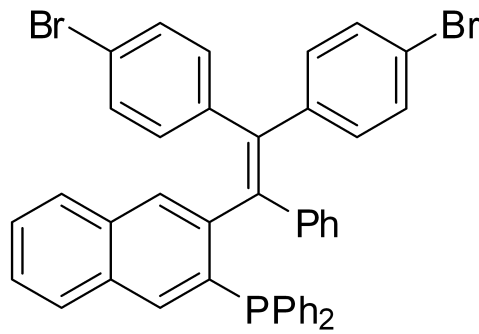

**3i**

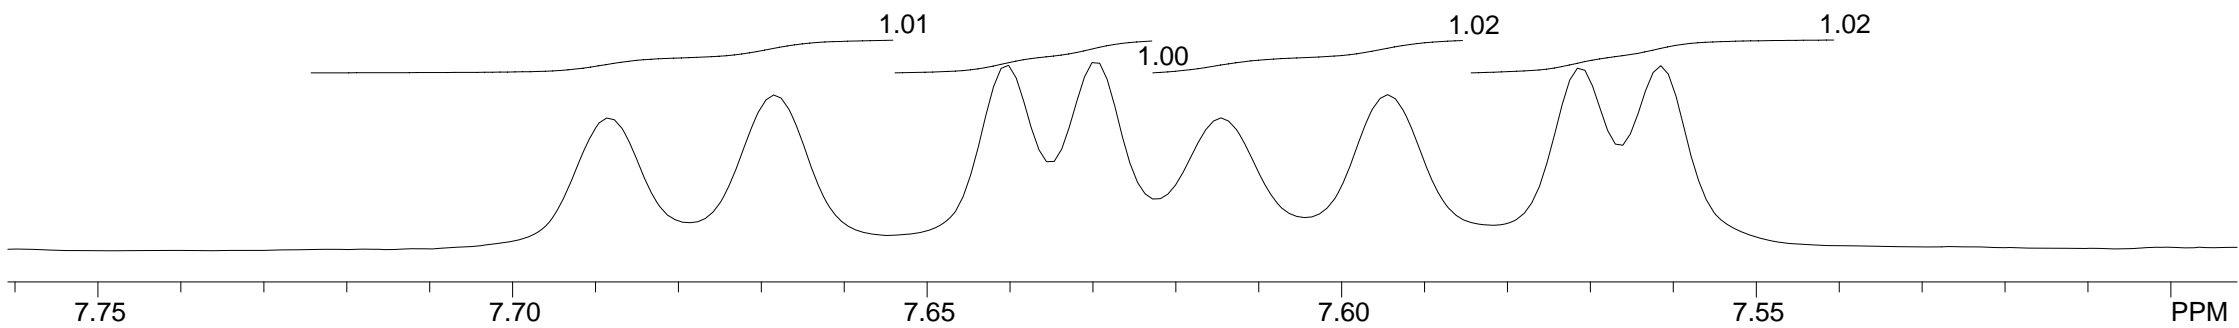

S60

13.854

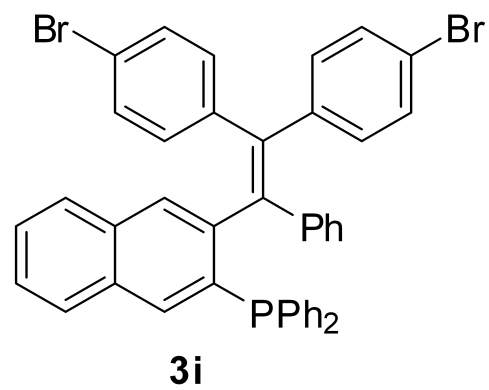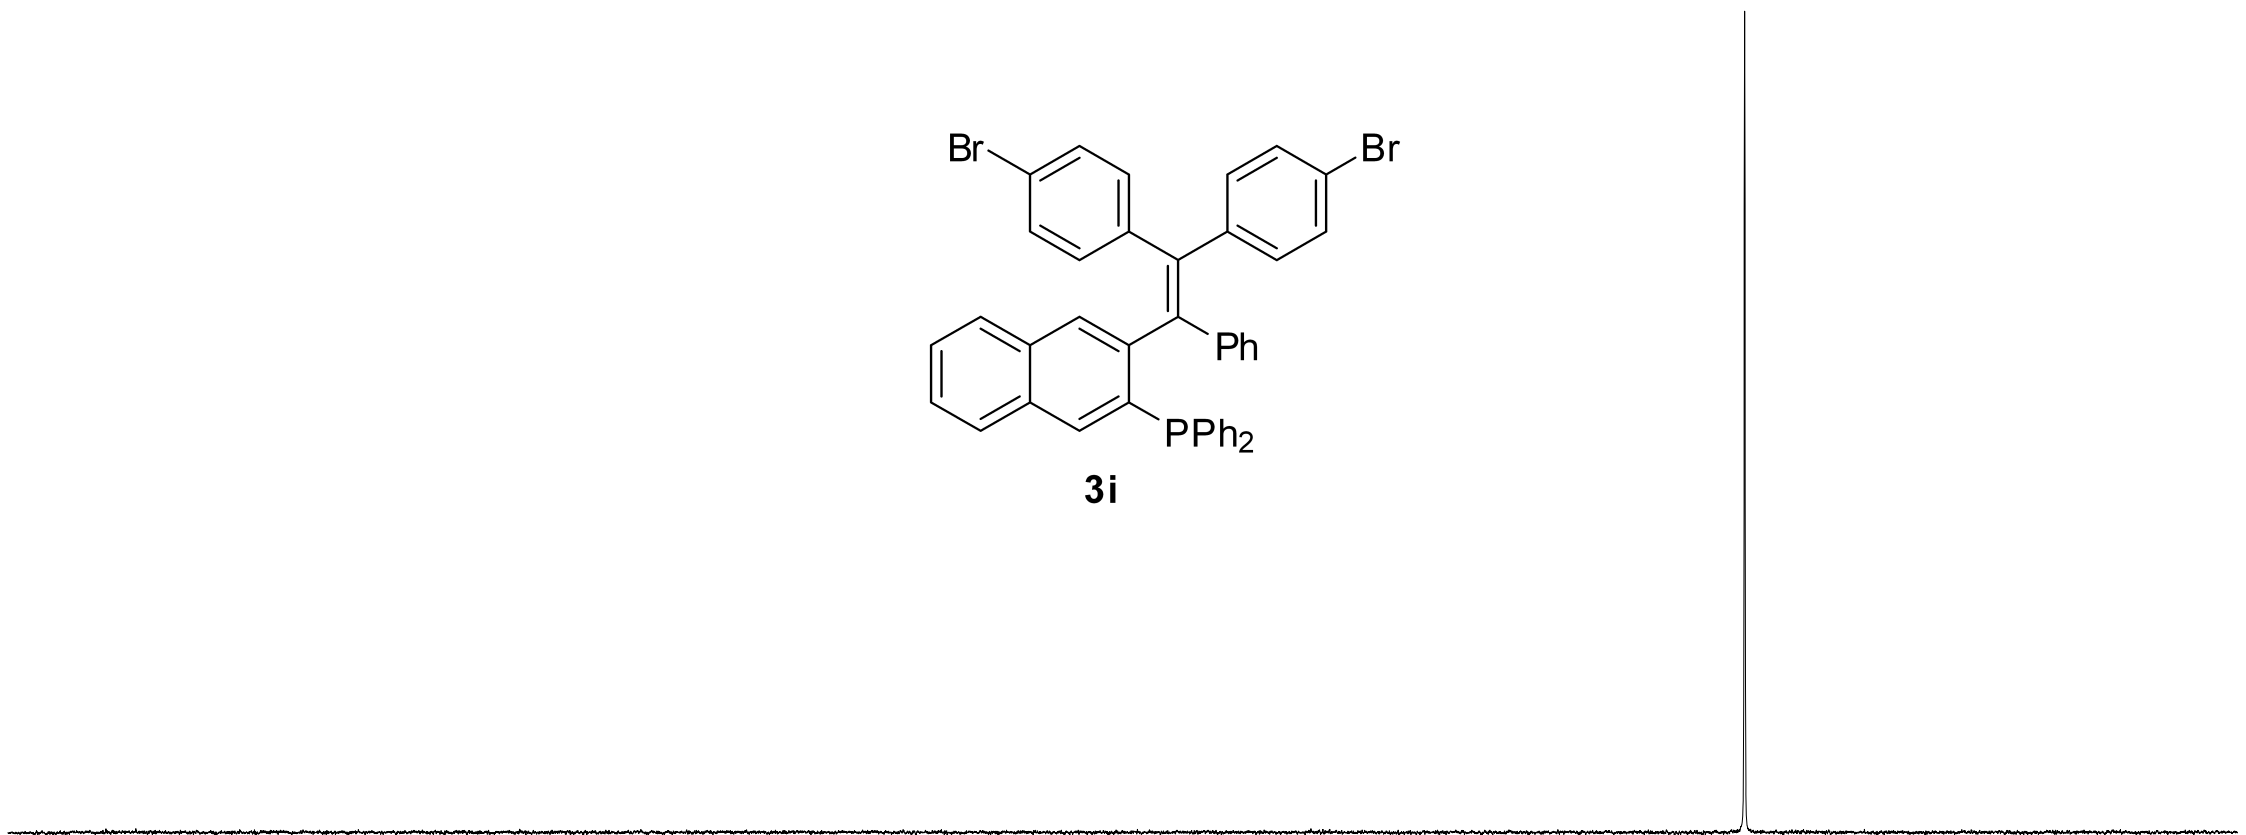

200

150

100

50

0

-50

PPM

S61

146.029  
145.711  
142.433  
142.230  
141.929  
141.572  
141.519  
139.865  
138.118  
137.995  
137.120  
137.025  
135.483  
135.346  
133.966  
133.764  
133.402  
133.154  
133.074  
132.927  
132.743  
132.361  
131.342  
131.066  
130.817  
130.762  
130.581  
128.452  
128.361  
128.302  
128.236  
128.169  
127.972  
127.894  
127.537  
127.493  
126.976  
126.548  
126.036  
120.867  
120.702  
77.315  
77.205  
77.000  
76.677

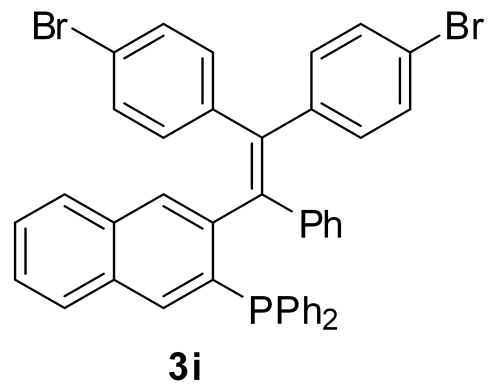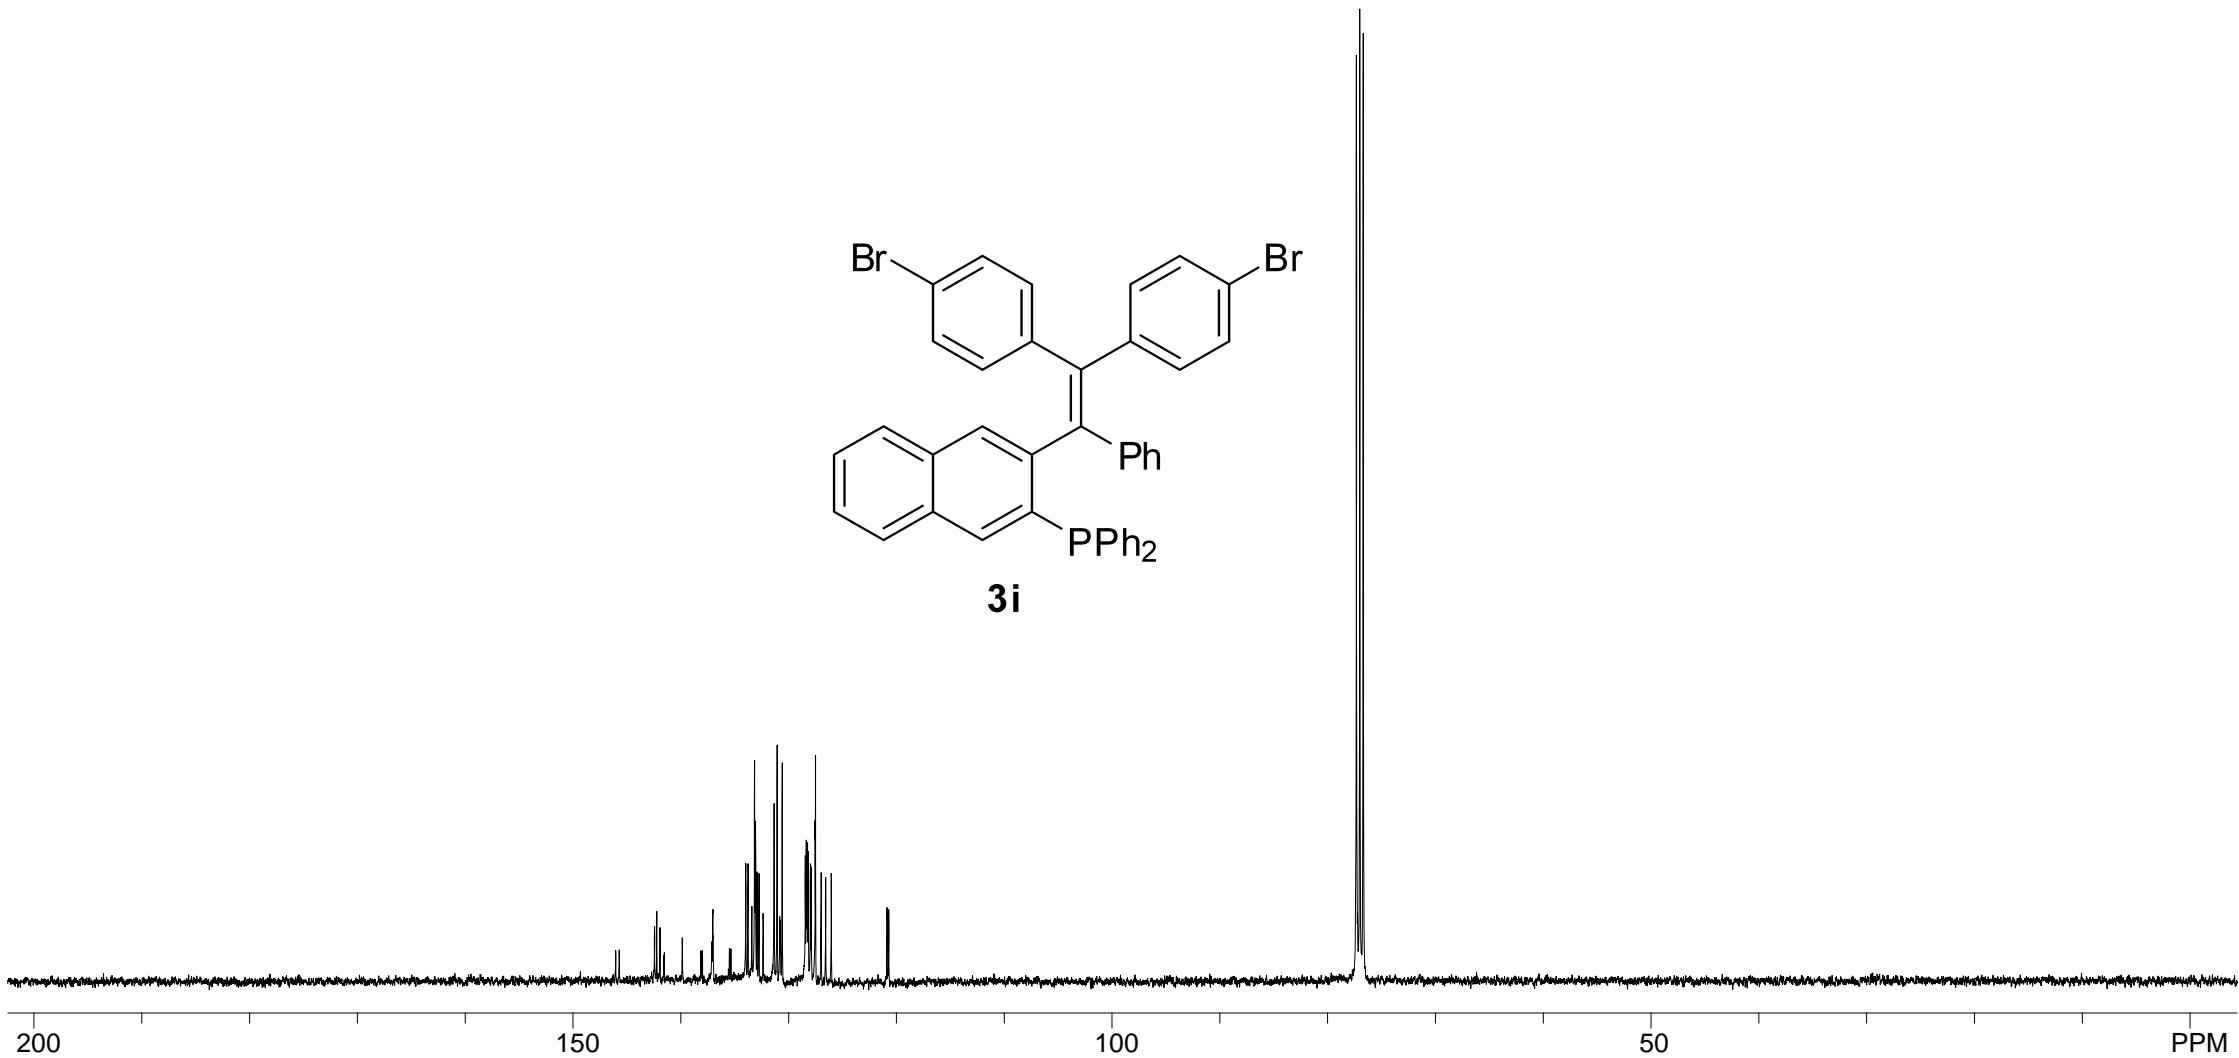

146.029  
145.711

142.433  
142.230  
141.929  
141.572  
141.519

139.865

138.118  
137.995  
137.120  
137.025

135.483  
135.346

133.966  
133.764  
133.402  
133.154  
133.074

132.927  
132.743  
132.361  
131.342  
131.066  
130.817

130.762  
130.581  
128.452  
128.361  
128.302

128.236  
128.169  
127.972  
127.894  
127.537  
127.493

126.976  
126.548  
126.036

120.867  
120.702

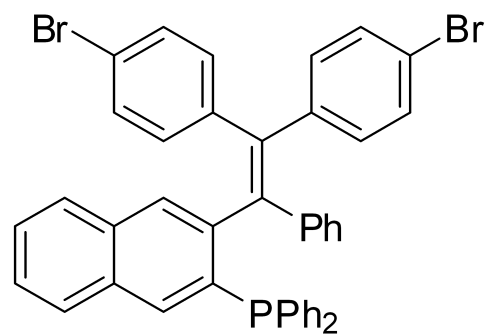

**3i**

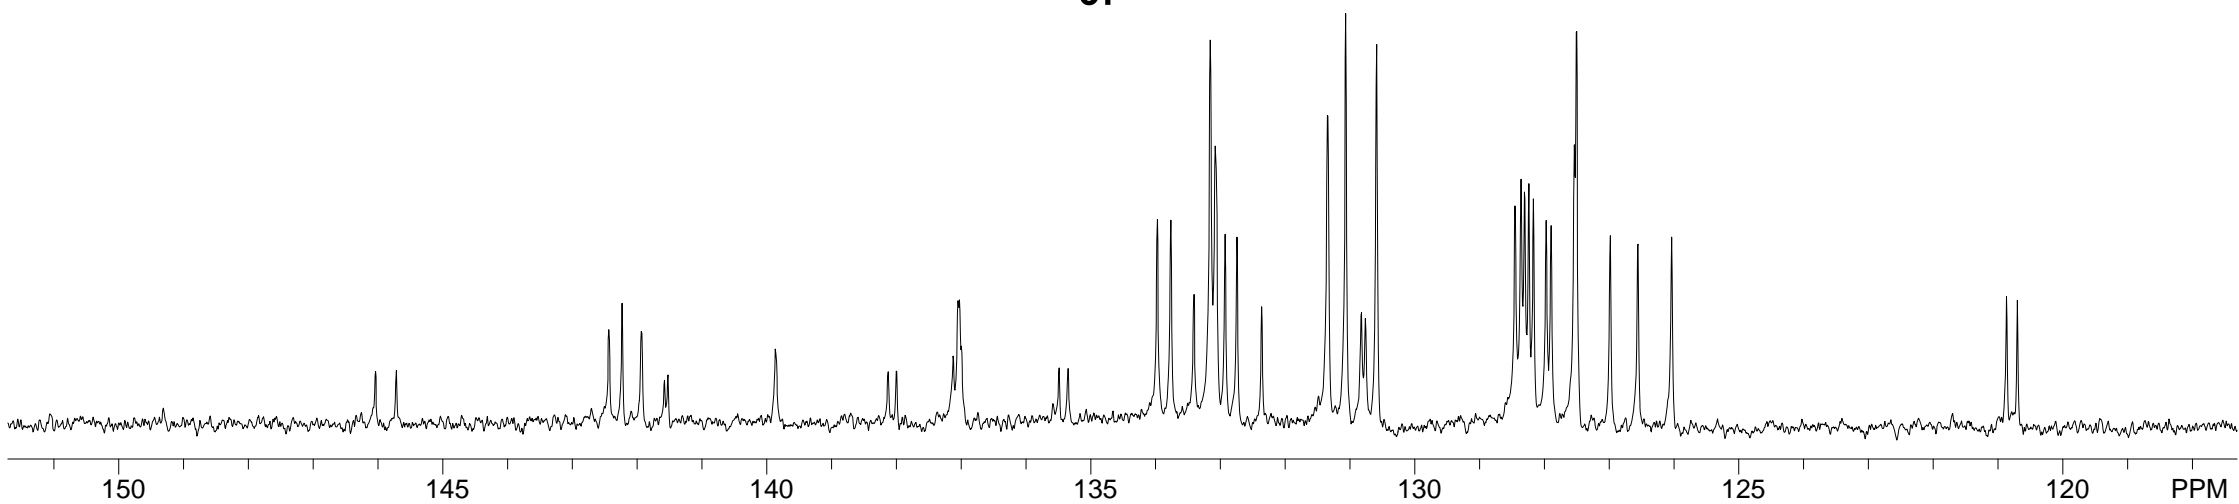

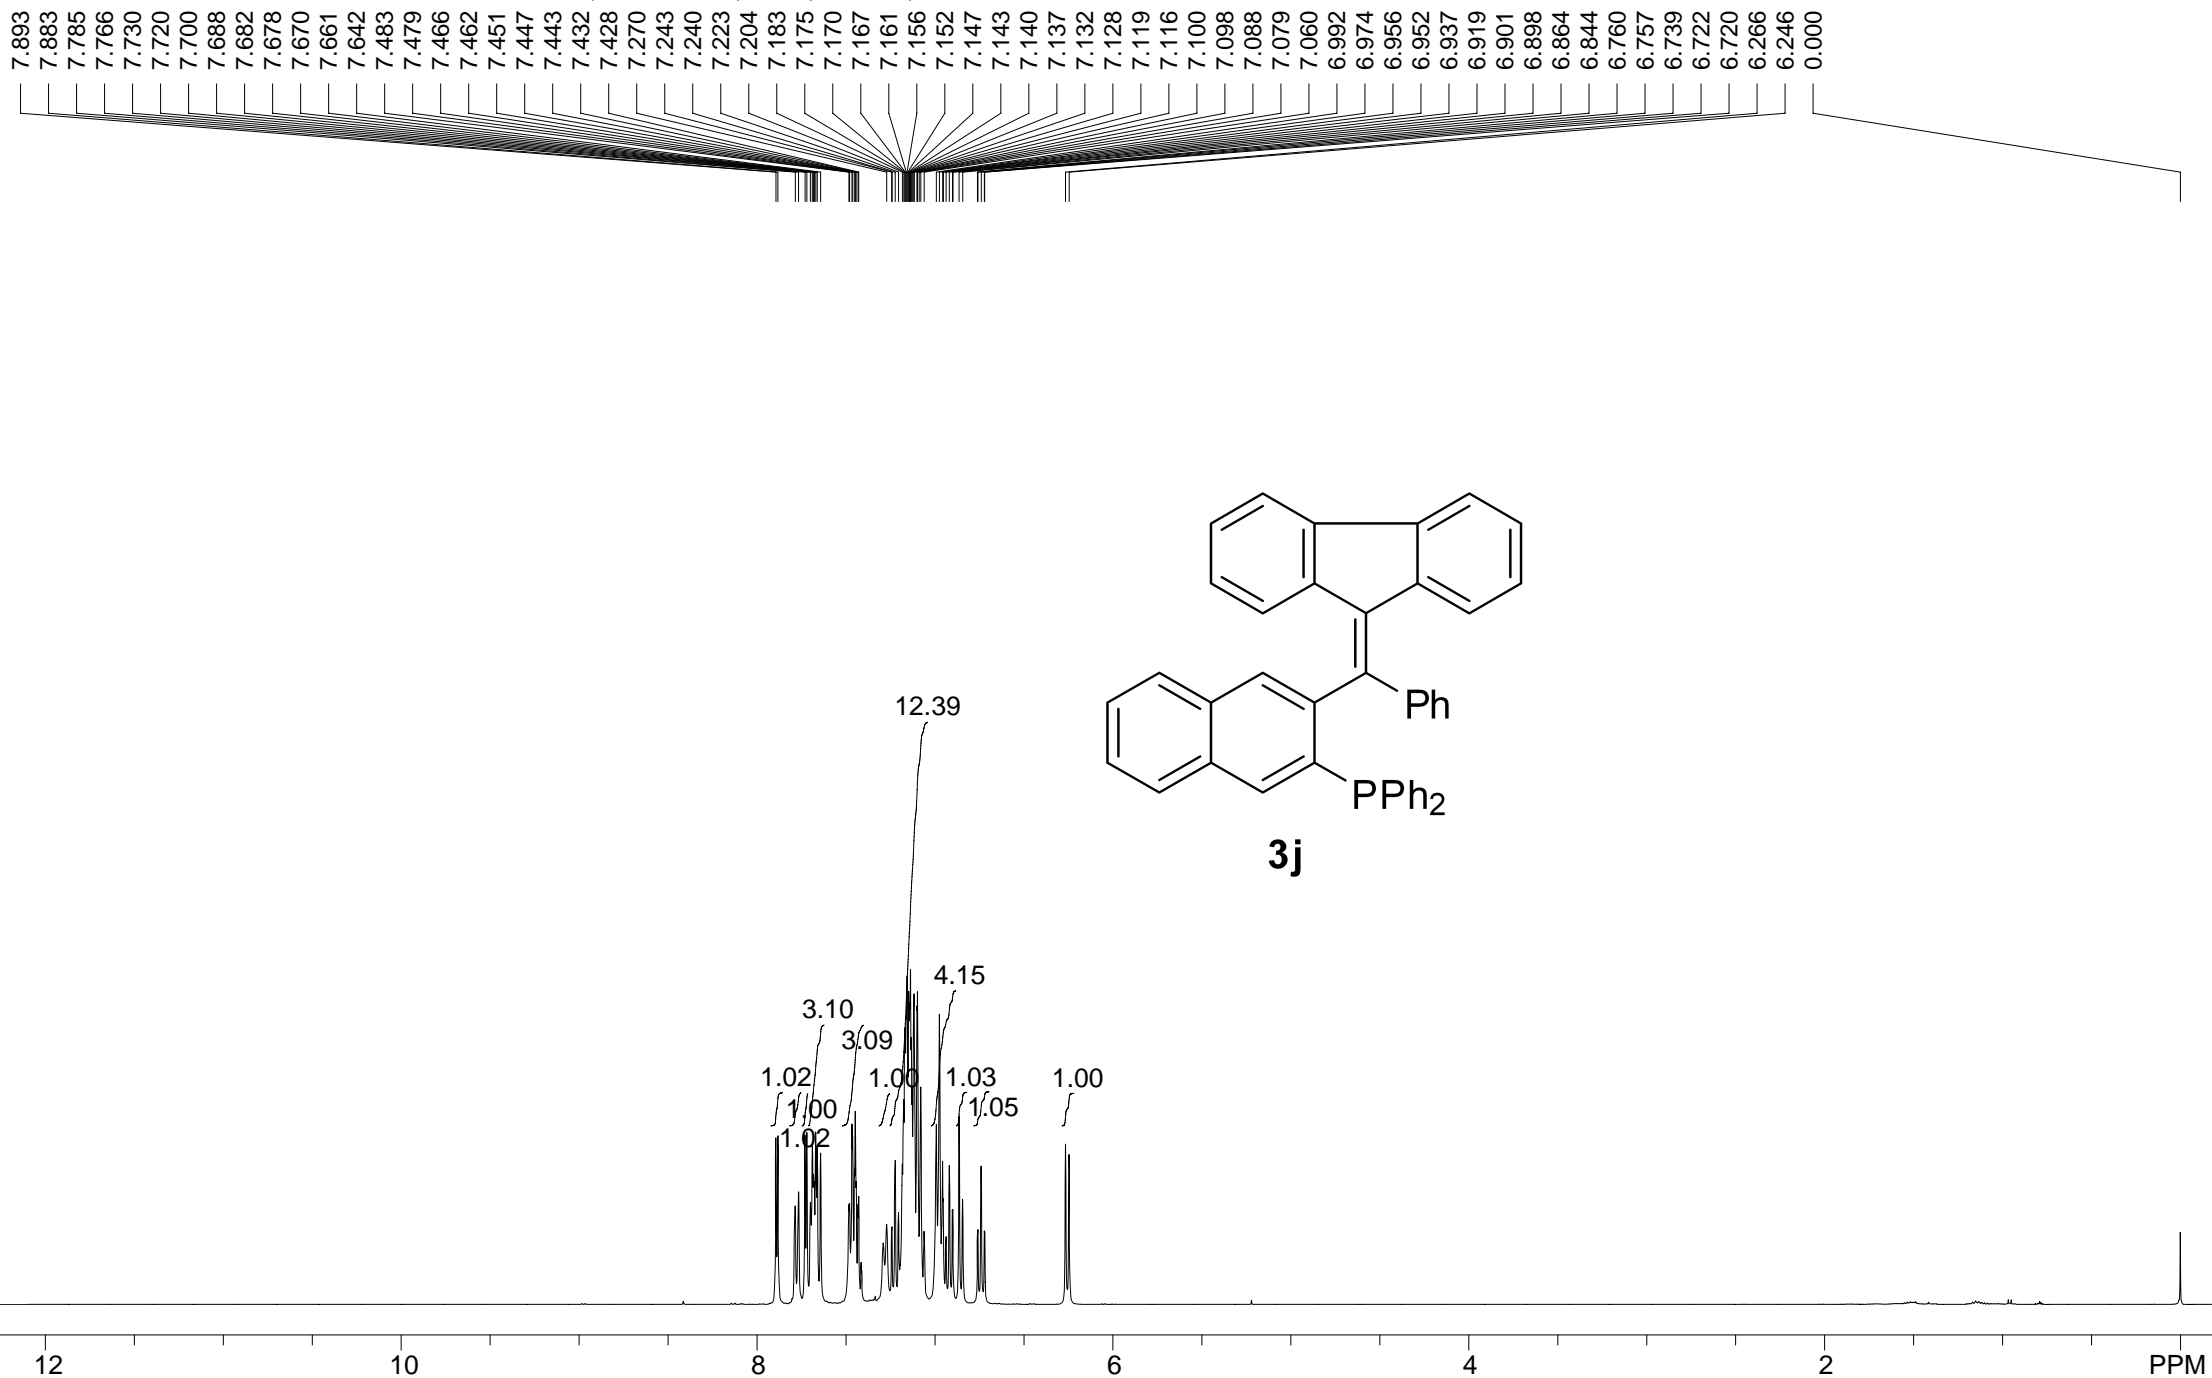



7.893  
7.883  
7.785  
7.766  
7.730  
7.720  
7.700  
7.688  
7.682  
7.678  
7.670  
7.661  
7.642  
7.483  
7.479  
7.466  
7.462  
7.451  
7.447  
7.443  
7.432  
7.428  
7.270  
7.243  
7.240  
7.223  
7.204  
7.183  
7.175  
7.170  
7.167  
7.161  
7.156  
7.152  
7.147  
7.143  
7.140  
7.137  
7.132  
7.128  
7.119  
7.116  
7.100  
7.098  
7.088  
7.079  
7.060  
6.992  
6.974  
6.956  
6.952  
6.937  
6.919  
6.901  
6.898  
6.864  
6.844  
6.760  
6.757  
6.739  
6.722  
6.720  
6.266  
6.246

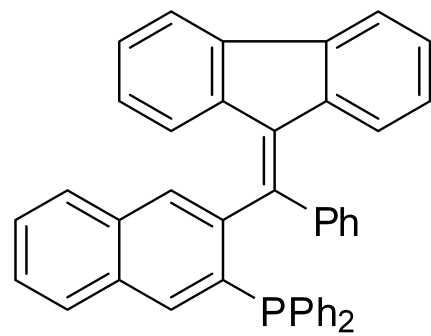

**3j**

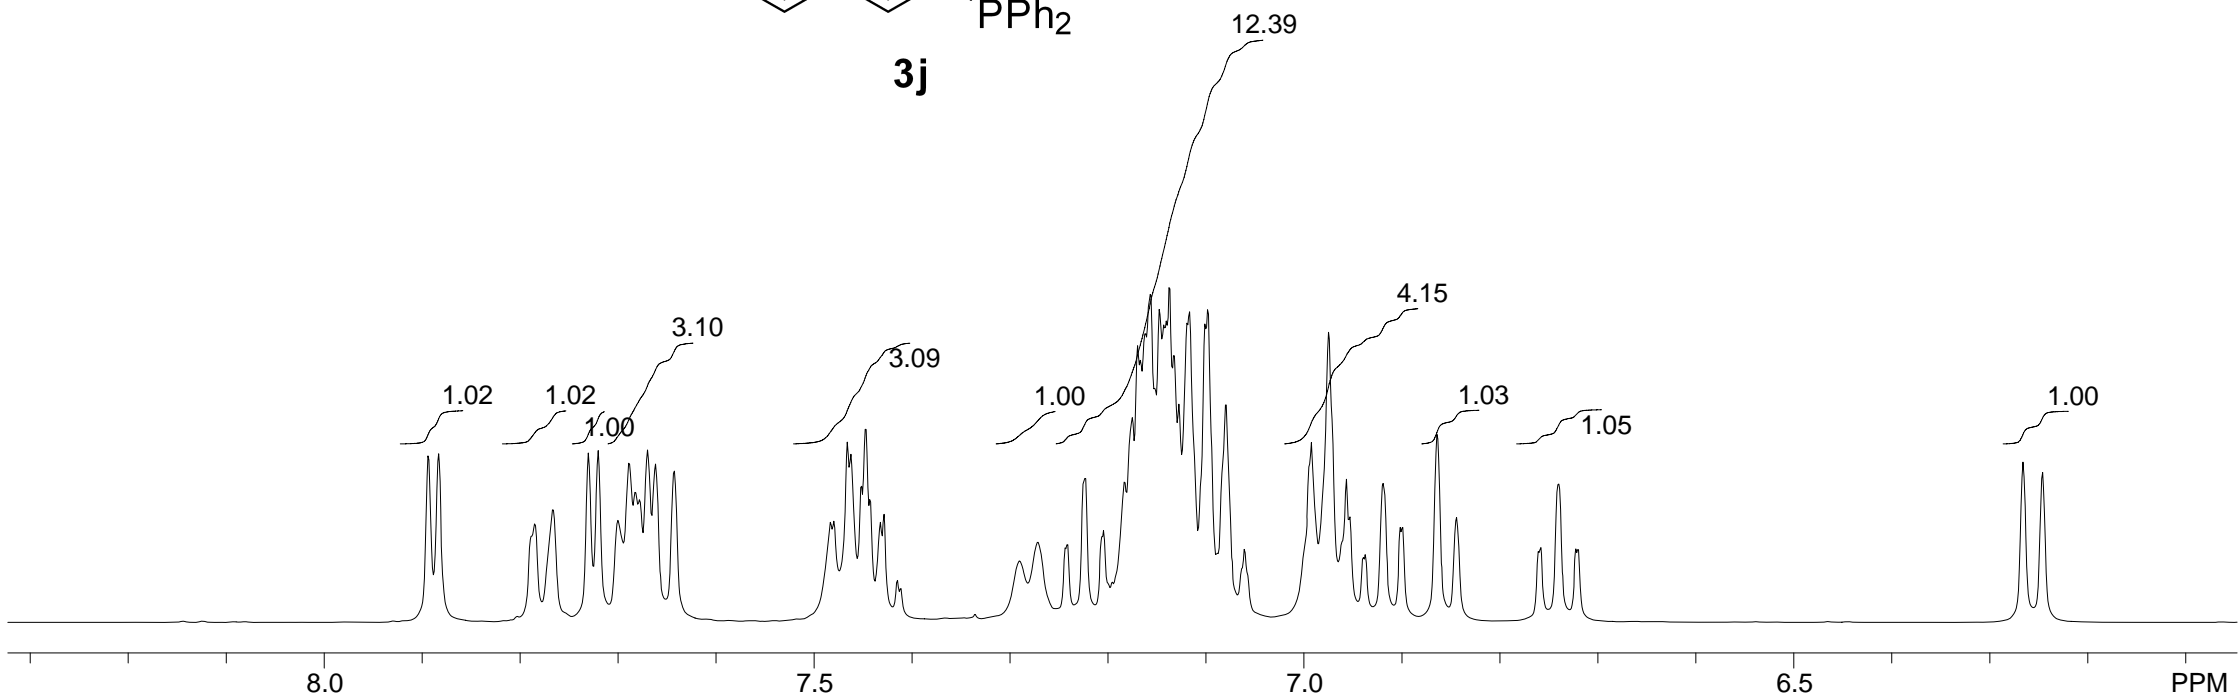

13.643

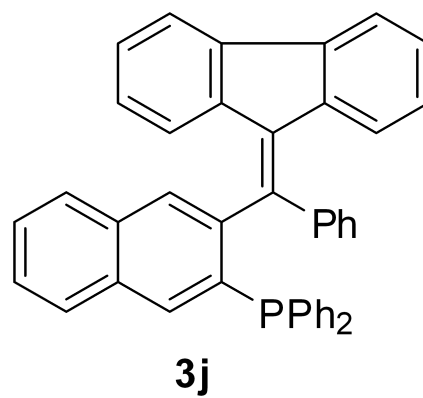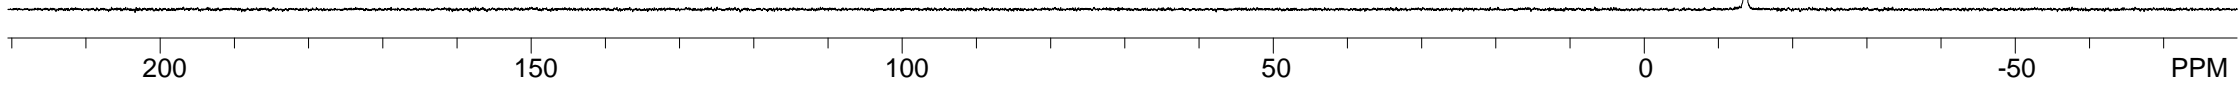

145.828  
145.491  
144.588  
144.553  
141.375  
140.810  
140.366  
139.193  
138.491  
137.707  
137.574  
136.861  
136.841  
136.764  
136.649  
135.677  
135.646  
135.561  
135.415  
133.936  
133.884  
133.683  
133.447  
133.258  
132.886  
131.870  
131.809  
129.627  
128.412  
128.353  
128.262  
128.193  
128.107  
128.029  
127.961  
127.903  
127.862  
127.697  
127.456  
127.126  
126.548  
126.393  
126.307  
125.156  
125.049  
119.243  
119.142  
77.319  
77.206  
77.000  
76.676

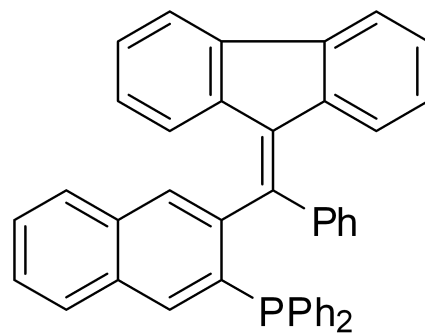

**3j**

200

150

100

50

PPM

S67

145.828  
145.491  
144.588  
144.553

141.375  
140.810  
140.366

139.193

138.491  
137.707  
137.574

136.861  
136.841  
136.764  
136.649

135.677  
135.646  
135.561  
135.415

133.936  
133.884  
133.683  
133.447  
133.258  
132.886  
131.870  
131.809

128.412  
129.627  
128.353  
128.262  
128.193  
128.107  
128.029  
127.961  
127.903  
127.862  
127.697  
127.456  
127.126  
126.548  
126.393  
126.307  
125.156  
125.049

119.243  
119.142

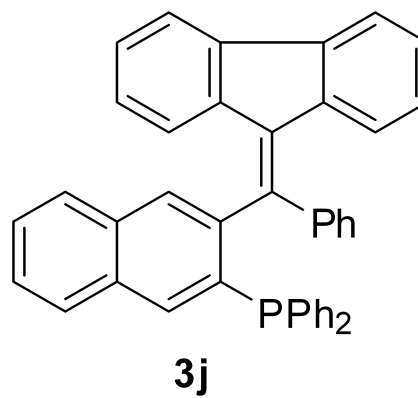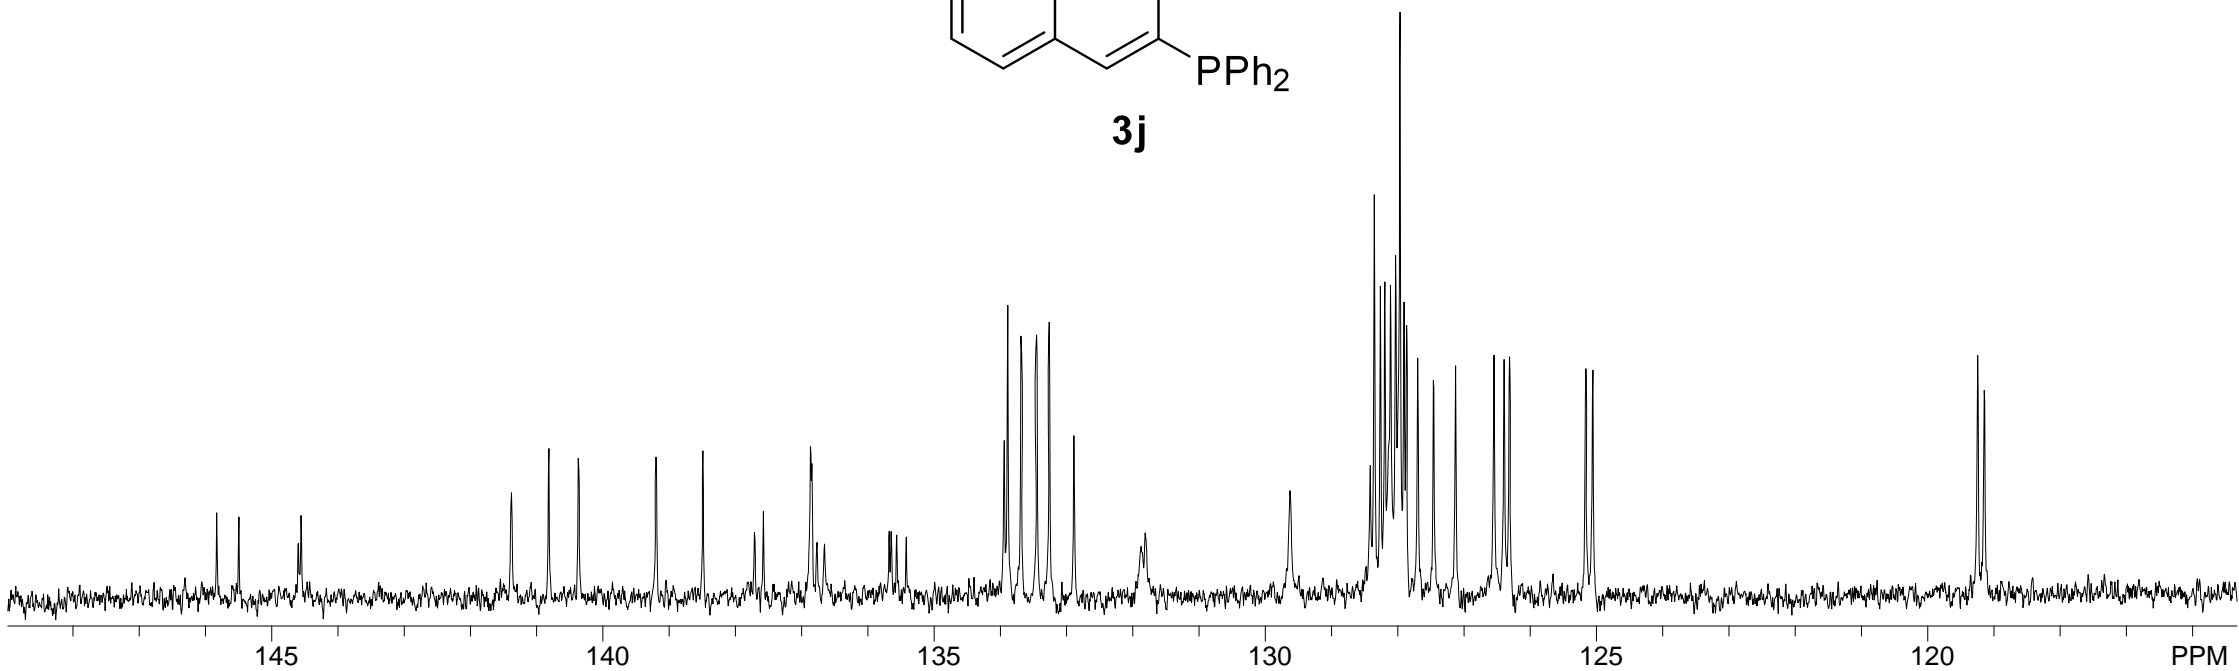

7.762  
7.752  
7.730  
7.721  
7.483  
7.479  
7.467  
7.453  
7.255  
7.214  
7.190  
7.182  
7.176  
7.156  
7.133  
7.116  
7.097  
7.086  
7.069  
7.057  
7.049  
7.030  
6.843  
6.823  
6.810  
6.790

2.200

0.000

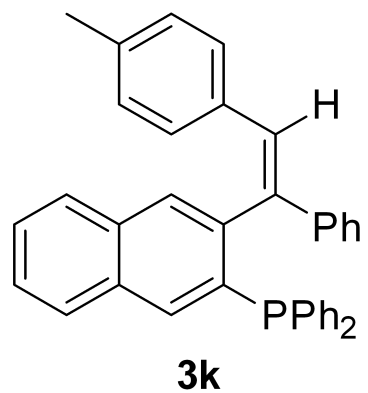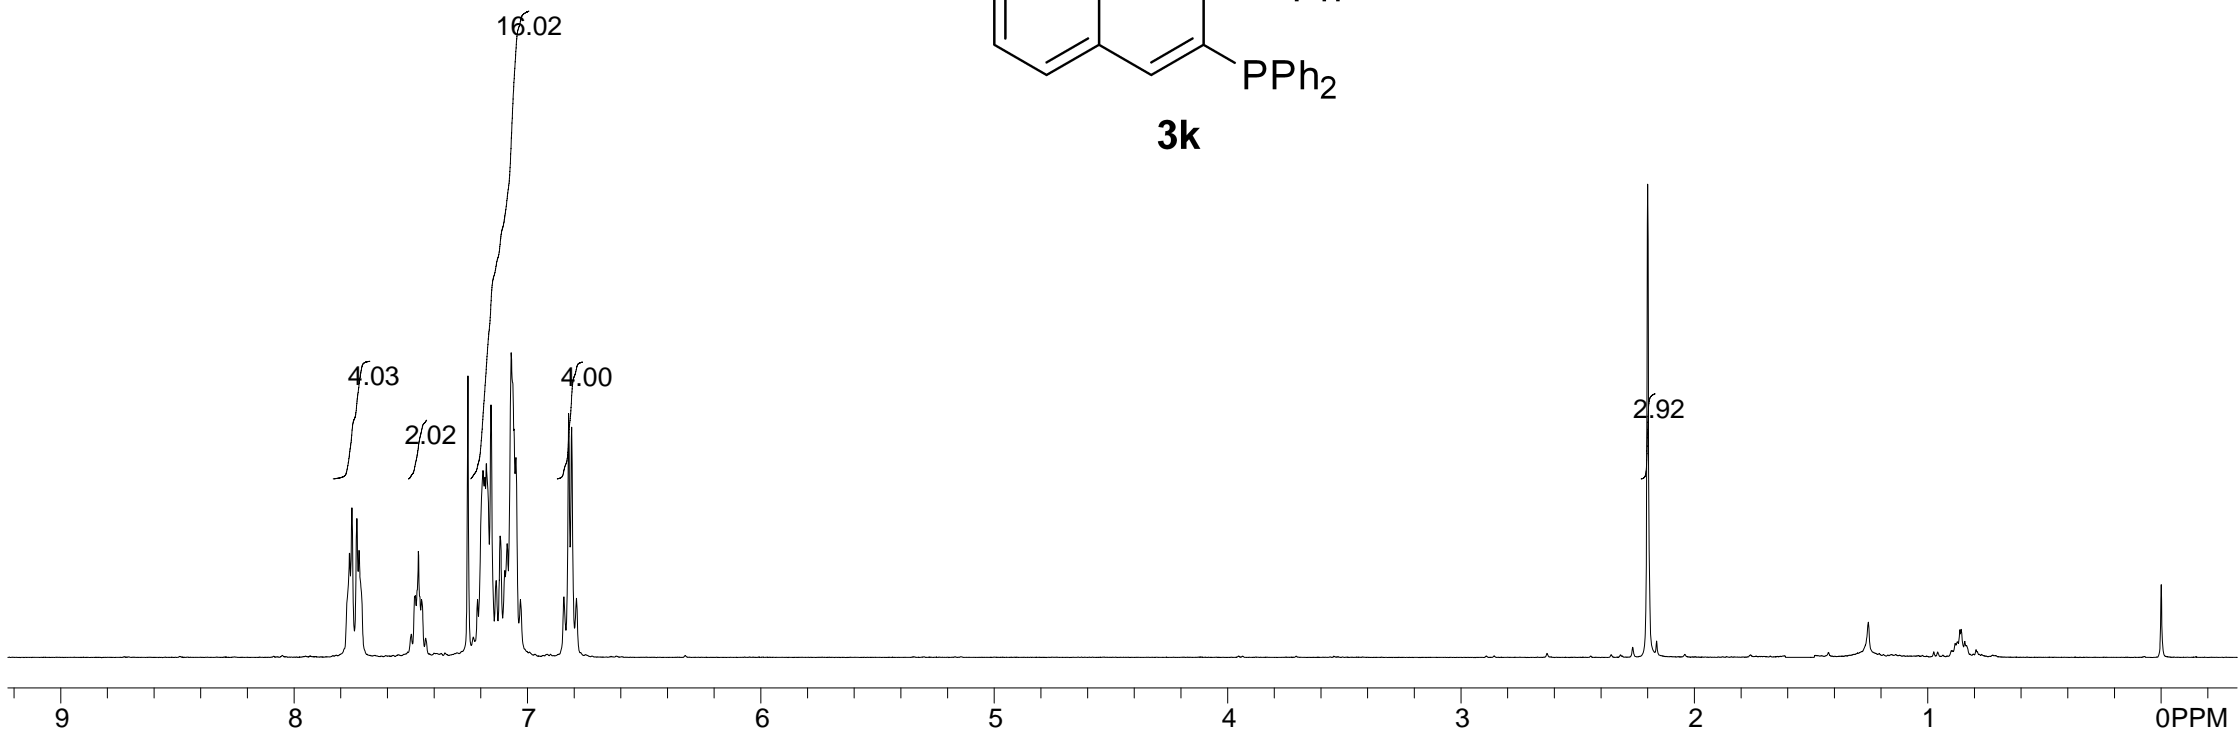

14.194

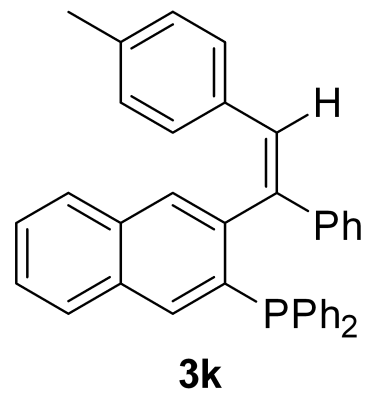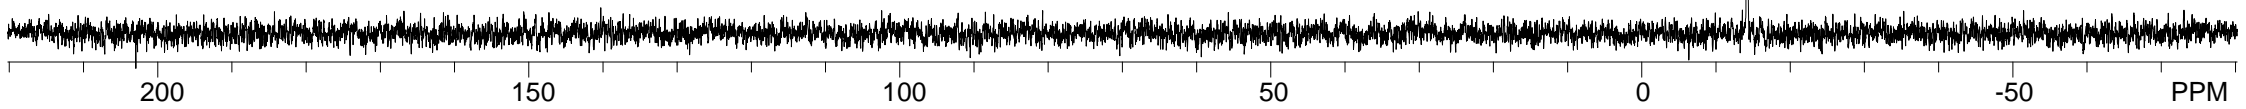

143.203  
142.871  
142.797  
140.718  
140.658  
137.669  
137.542  
136.851  
136.732  
136.465  
136.304  
136.158  
134.492  
133.897  
133.818  
133.679  
133.615  
133.479  
132.727  
129.719  
129.556  
129.491  
128.693  
128.172  
128.112  
128.019  
127.958  
127.913  
127.751  
127.226  
126.955  
126.837  
126.028  
77.324  
77.215  
77.000  
76.692

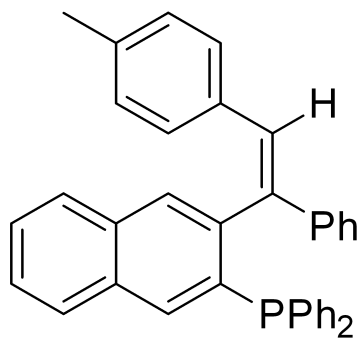

**3k**

21.087

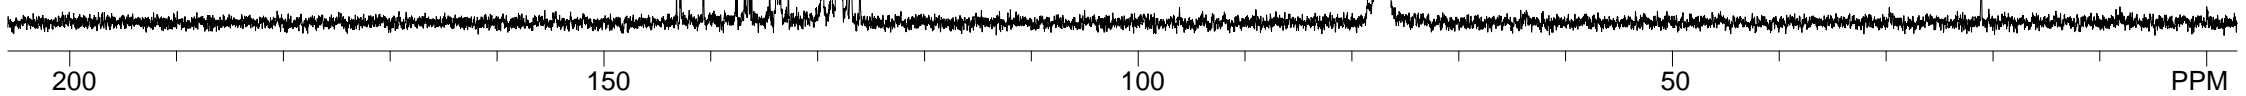

200

150

100

50

PPM

143.203  
142.871  
142.797

140.718  
140.658

137.669  
137.542  
136.851  
136.732  
136.465  
136.304  
136.158

134.492  
133.897  
133.818  
133.679  
133.615  
133.479  
132.727

129.719  
129.556  
129.491

128.693  
128.172  
128.112  
128.019  
127.958  
127.913  
127.751  
127.226  
126.955  
126.837  
126.028

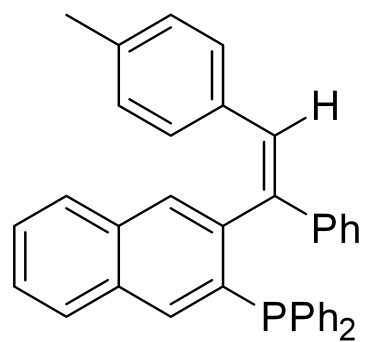

**3k**

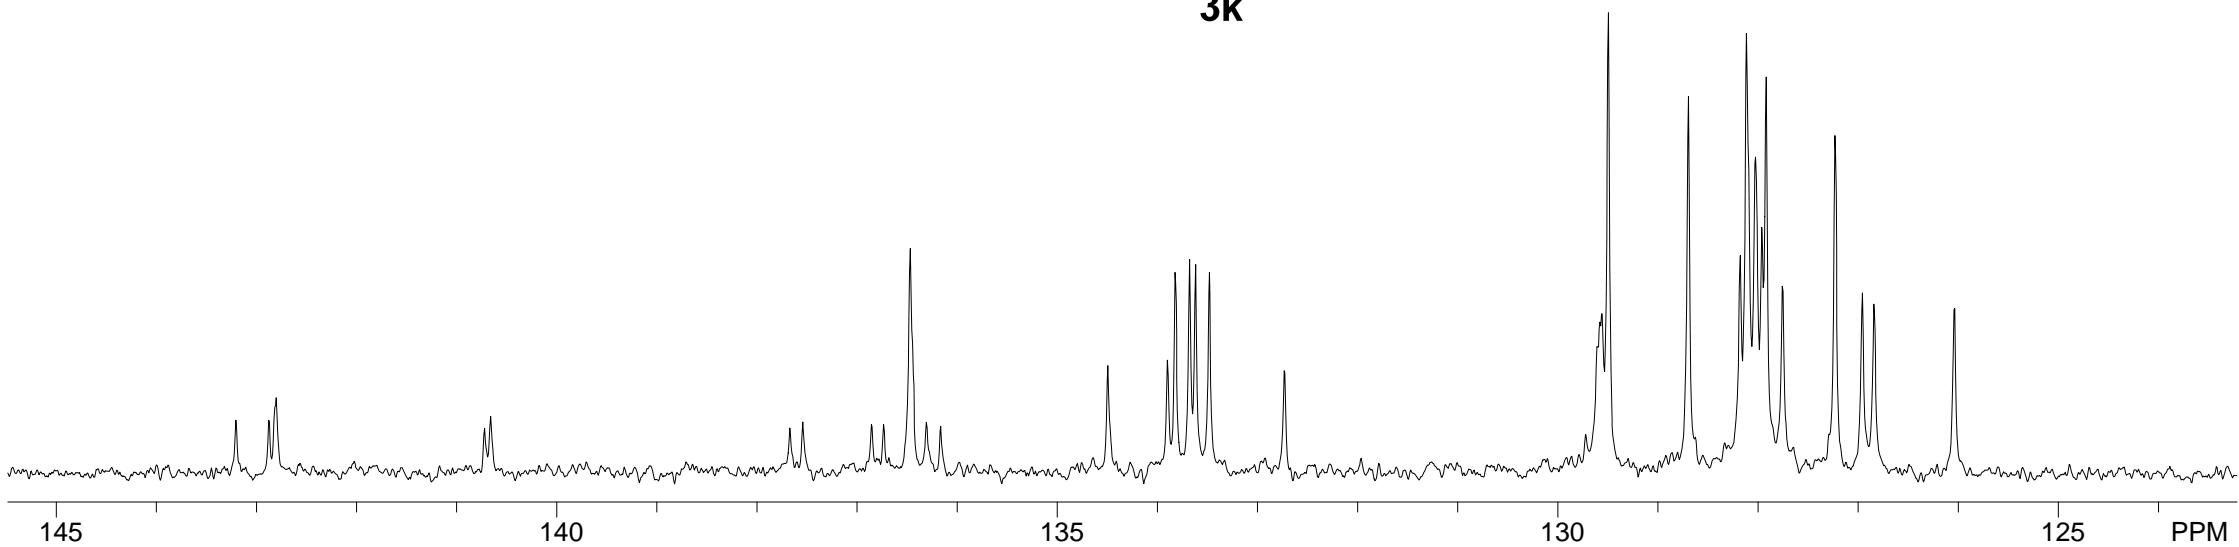



7.761  
7.754  
7.743  
7.592  
7.572  
7.489  
7.479  
7.420  
7.401  
7.378  
7.358  
7.289  
7.271  
7.258  
7.240  
7.186  
7.177  
7.172  
7.163  
7.114  
7.106  
7.099  
6.905  
6.885  
6.777  
6.757  
6.334

2.239

-0.000

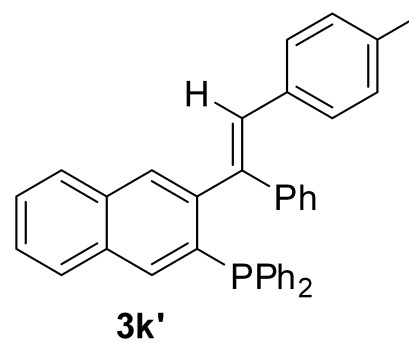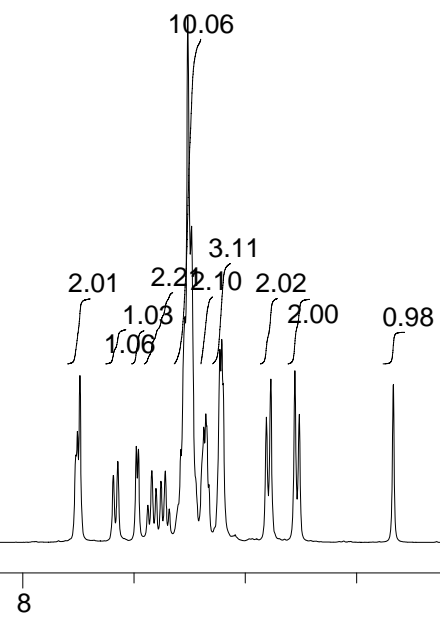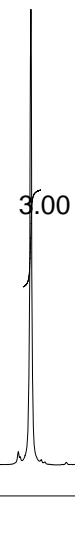

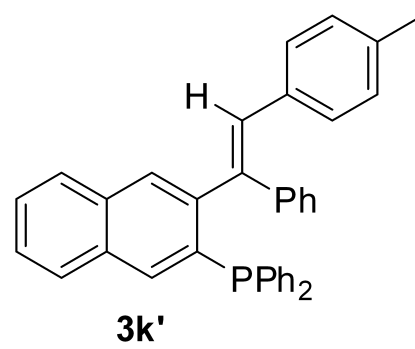

12.066

200

150

100

50

0

-50

PPM

146.718  
146.437  
140.917  
140.858  
140.200  
137.539  
137.416  
136.397  
136.012  
135.849  
134.698  
134.226  
134.096  
134.025  
133.190  
132.701  
132.657  
132.291  
130.416  
130.385  
129.249  
129.083  
129.036  
128.533  
128.412  
128.309  
128.242  
127.848  
127.817  
127.519  
127.055  
126.740  
125.935  
77.325  
77.000  
76.687

21.198

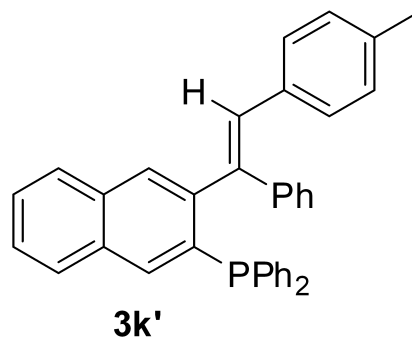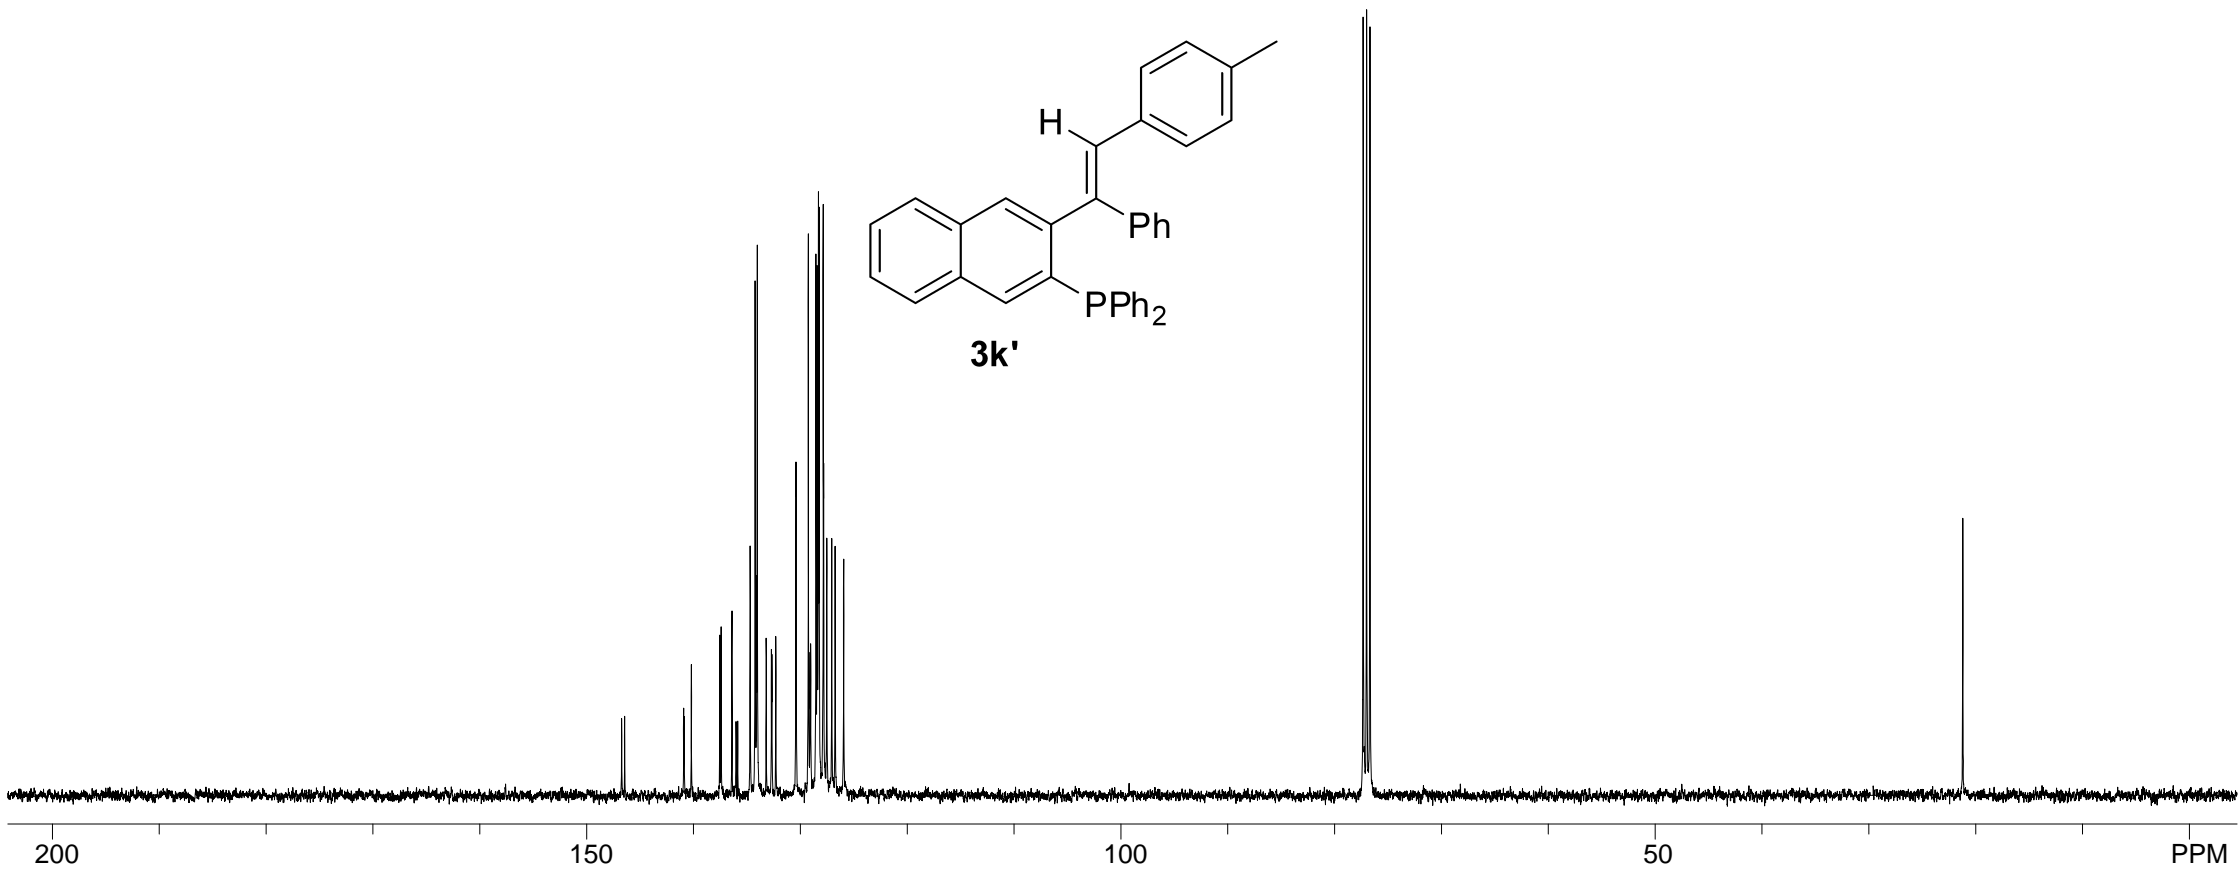

146.718  
146.437

140.917  
140.858  
140.200

137.539  
137.416

136.397  
136.012  
135.849

134.698  
134.226  
134.096  
134.025

133.190  
132.701  
132.657  
132.291

130.416  
130.385

129.249  
129.083  
129.036  
128.533  
128.412  
128.309  
128.242  
127.848  
127.817  
127.519  
127.055  
126.740  
125.935

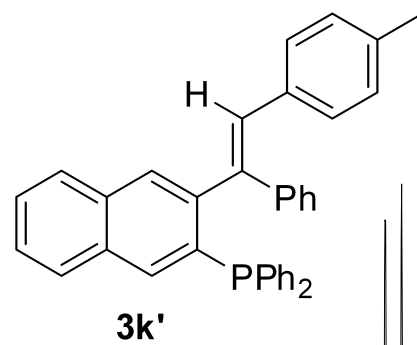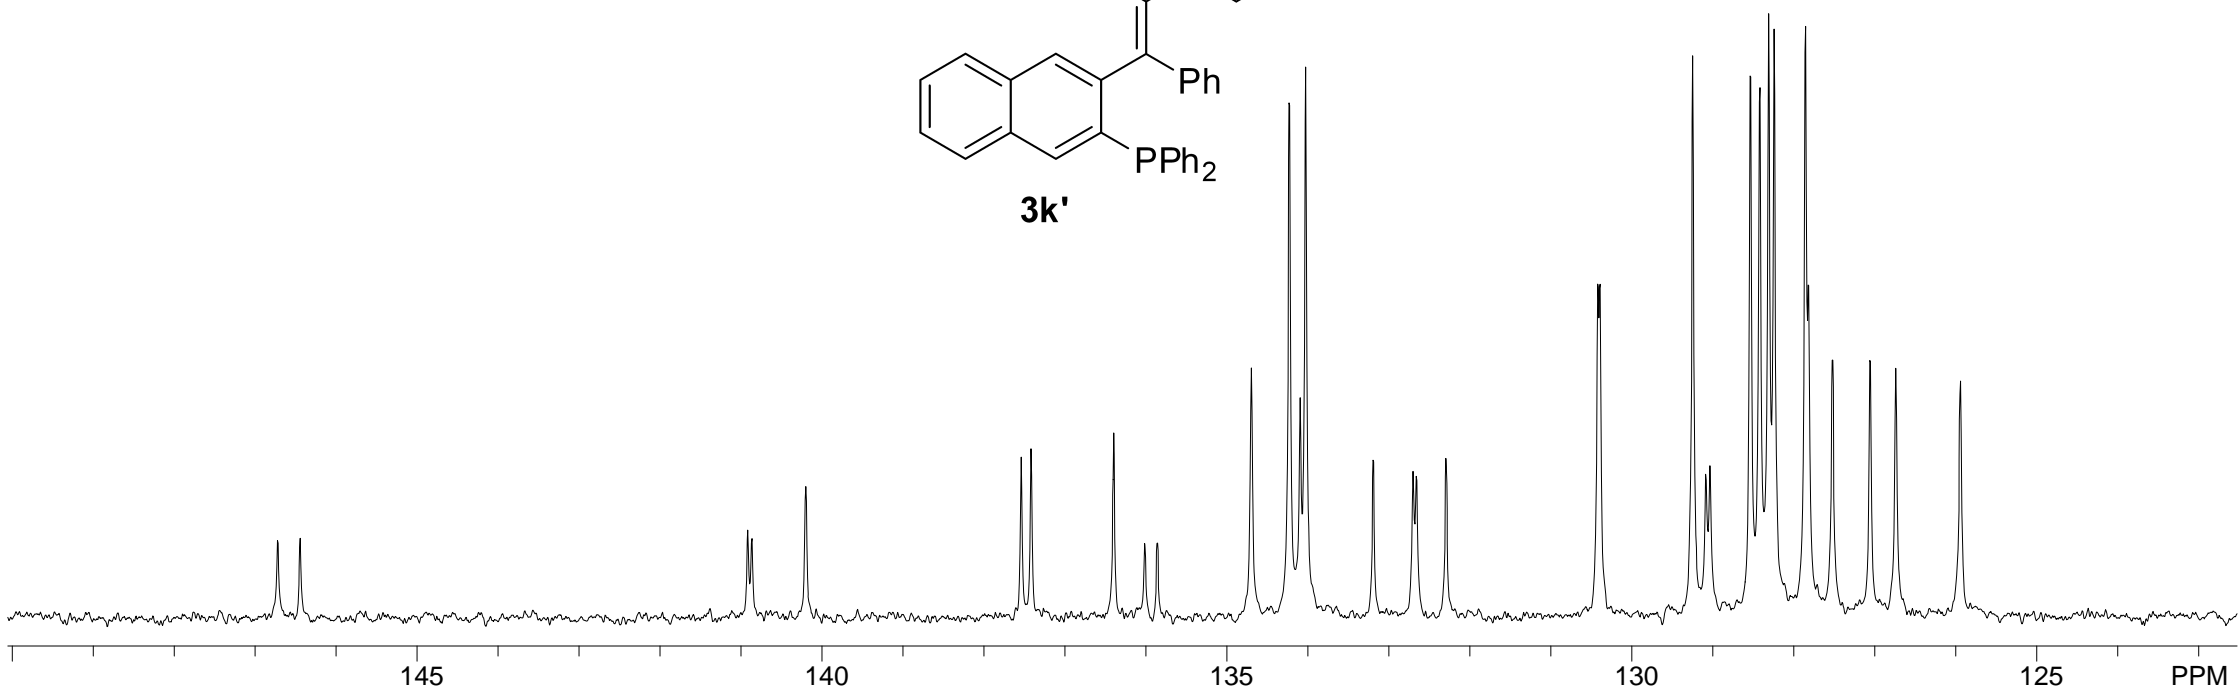

7.853  
7.833  
7.807  
7.798  
7.668  
7.647  
7.611  
7.601  
7.485  
7.430  
7.412  
7.403  
7.393  
7.352  
7.341  
7.219  
7.212  
7.193  
7.168  
7.151  
7.128  
7.120  
7.101  
7.085  
6.931  
6.923  
6.916  
6.888  
6.879  
6.872

1.600  
1.258  
-0.000

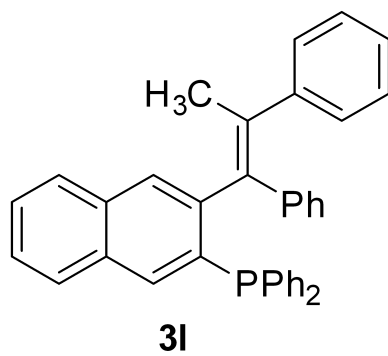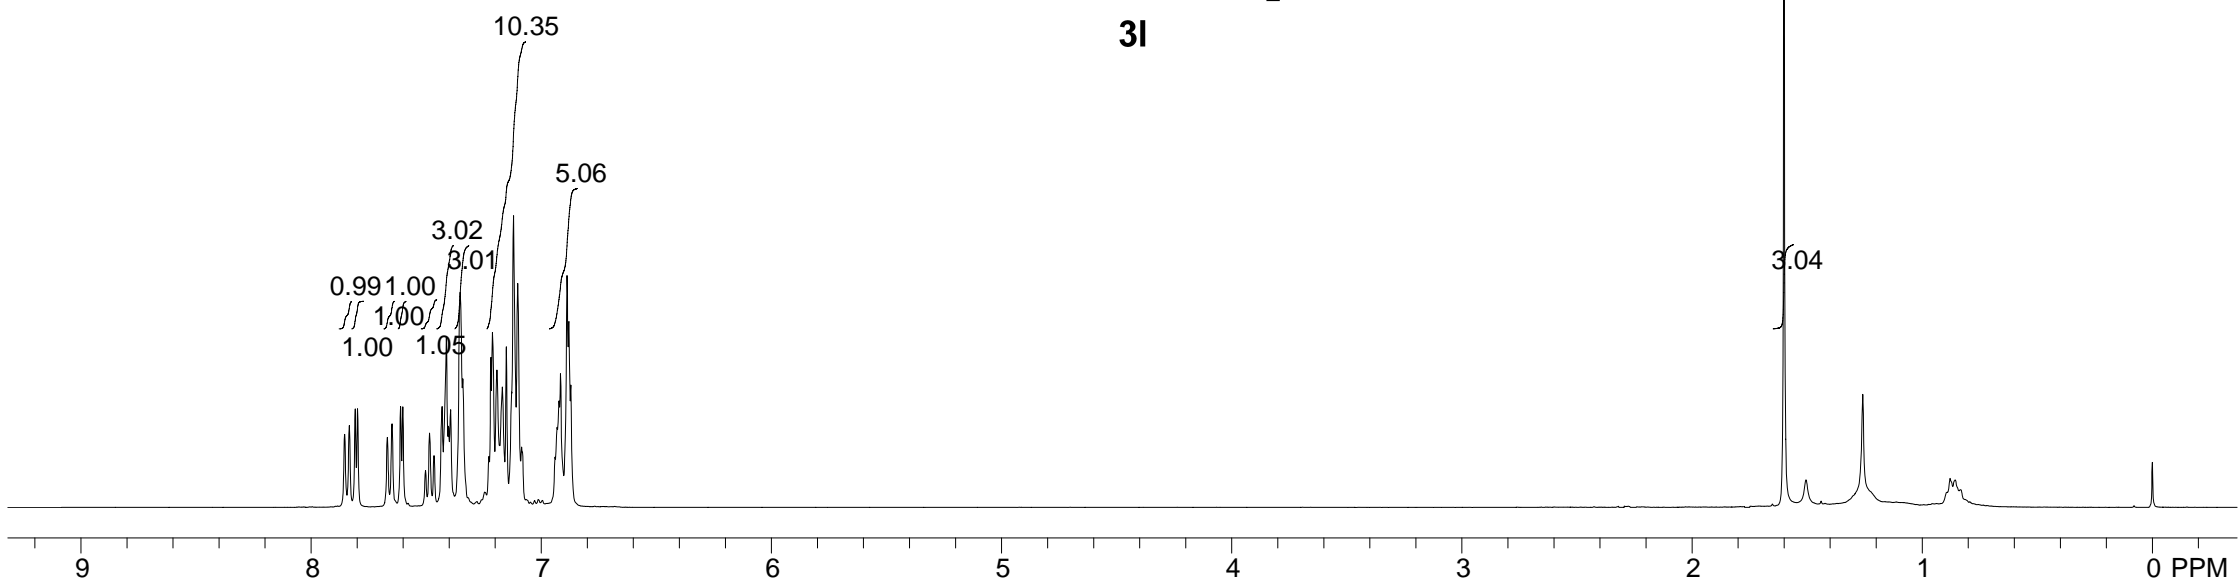

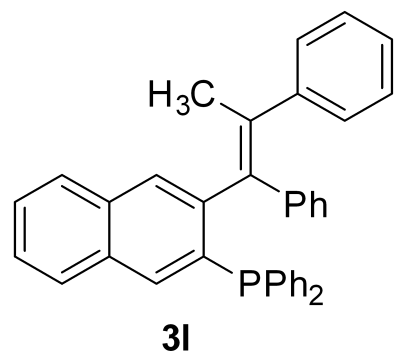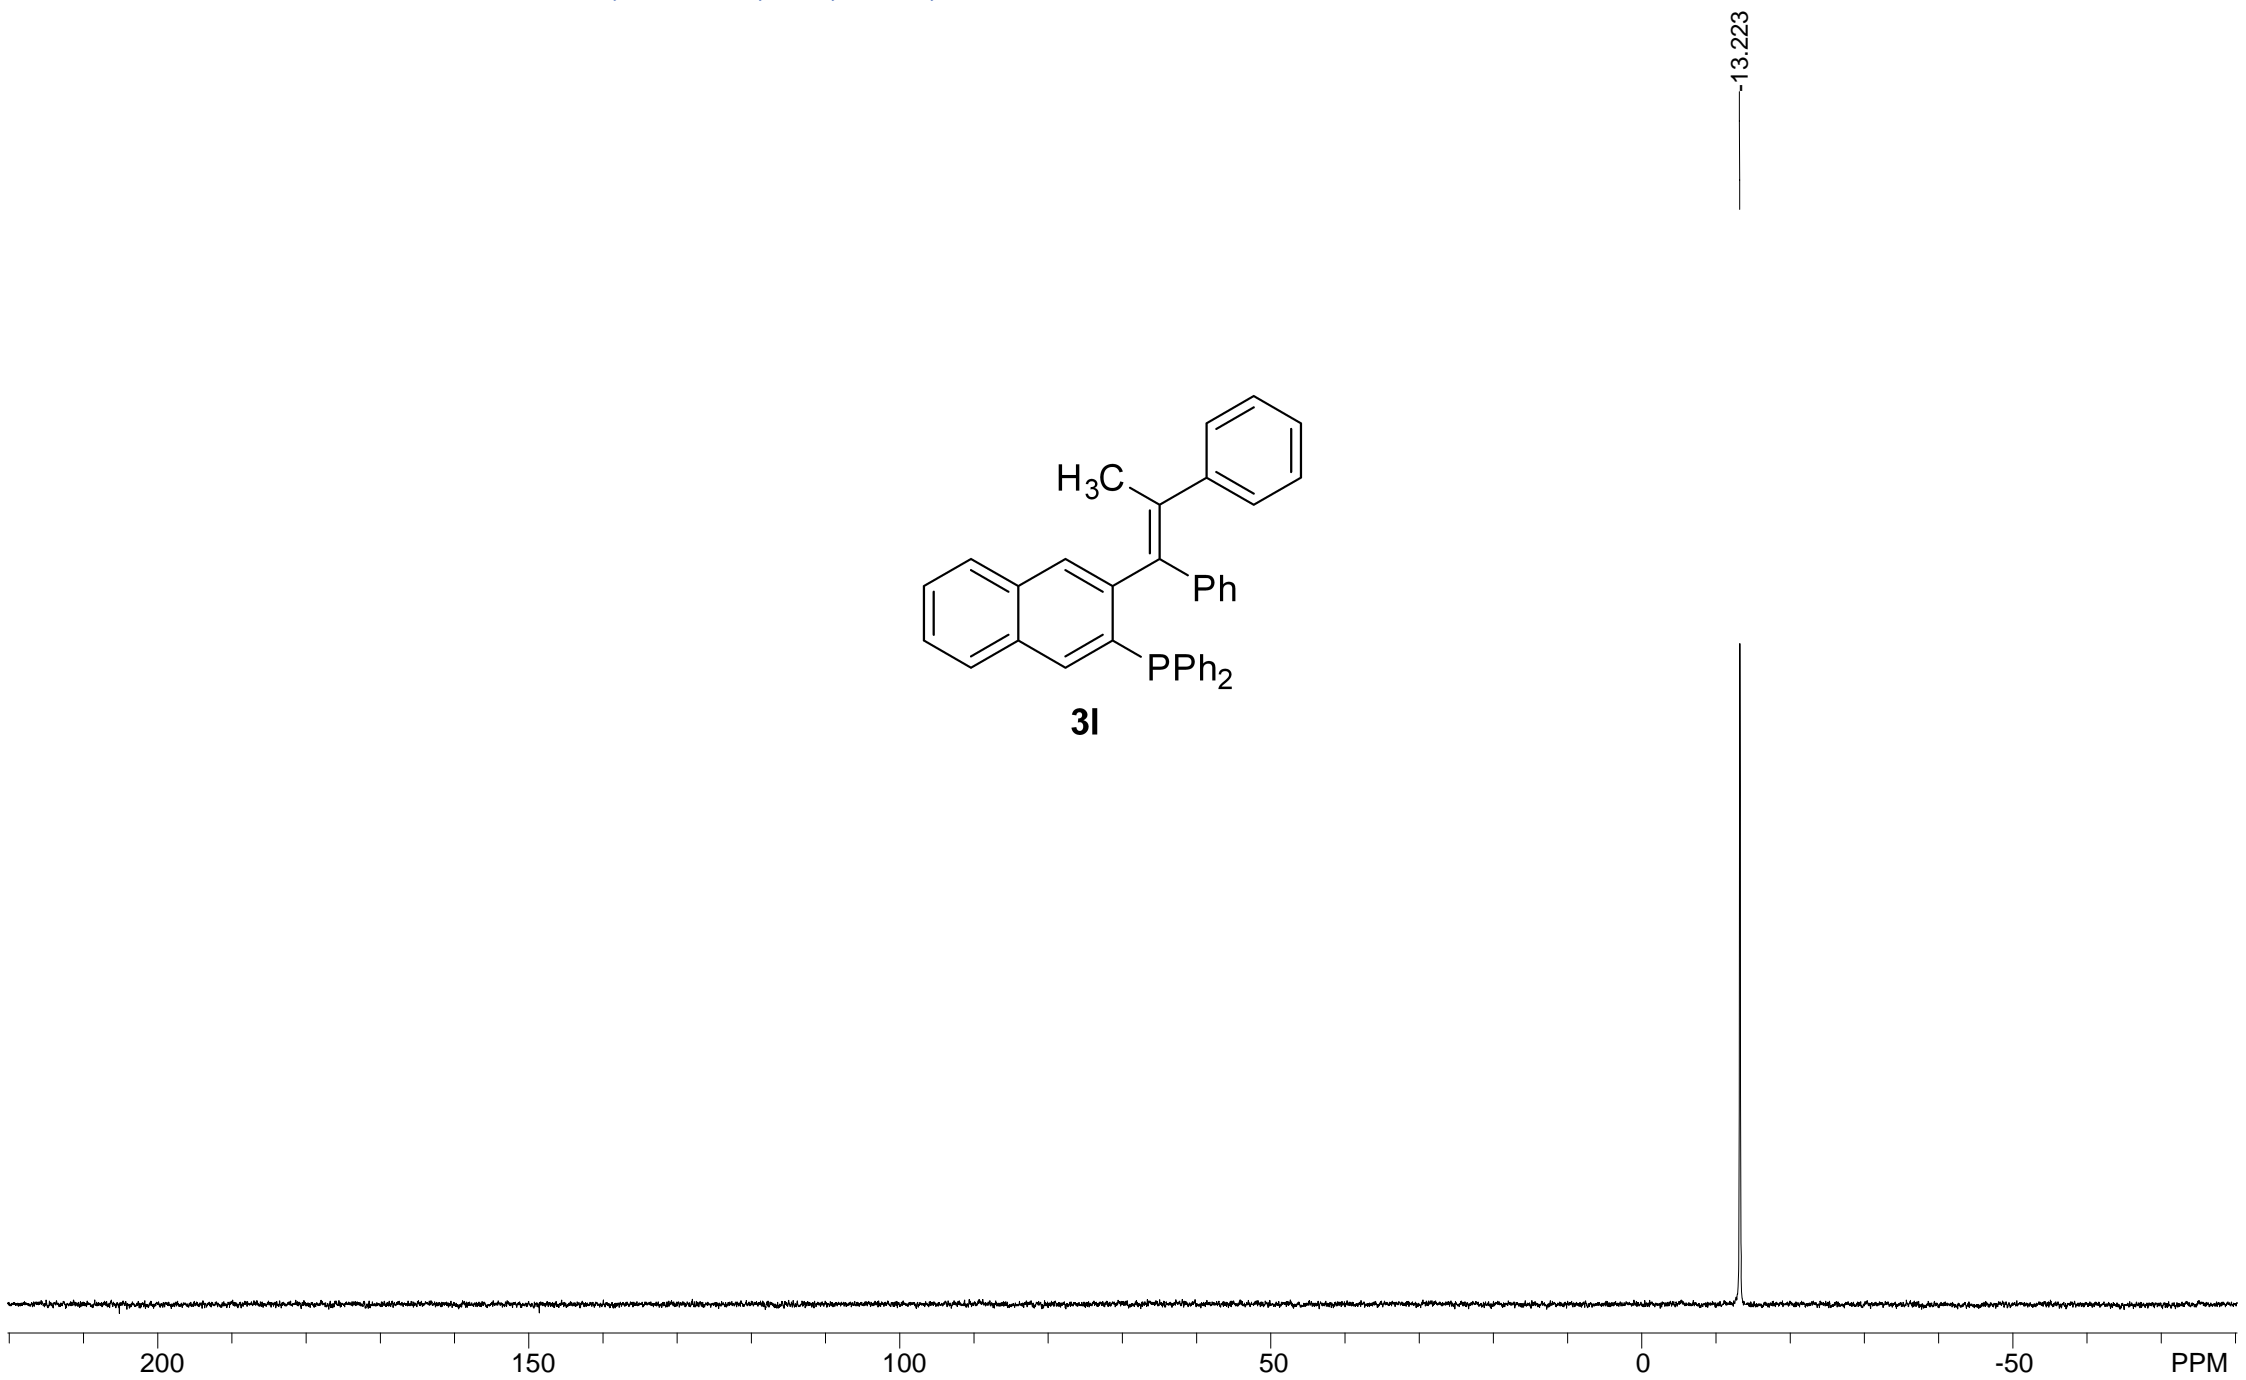

145.501  
145.188  
143.780  
141.210  
138.016  
137.964  
137.835  
137.340  
137.215  
137.050  
136.921  
136.608  
136.469  
135.015  
134.699  
134.482  
133.636  
133.607  
133.415  
132.301  
131.132  
131.108  
129.096  
128.844  
128.750  
128.446  
128.370  
128.198  
128.133  
128.075  
127.952  
127.846  
127.497  
126.902  
126.747  
126.244  
125.810  
125.580  
77.315  
77.200  
77.000  
76.675  
23.798

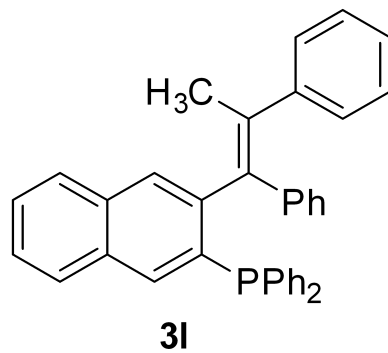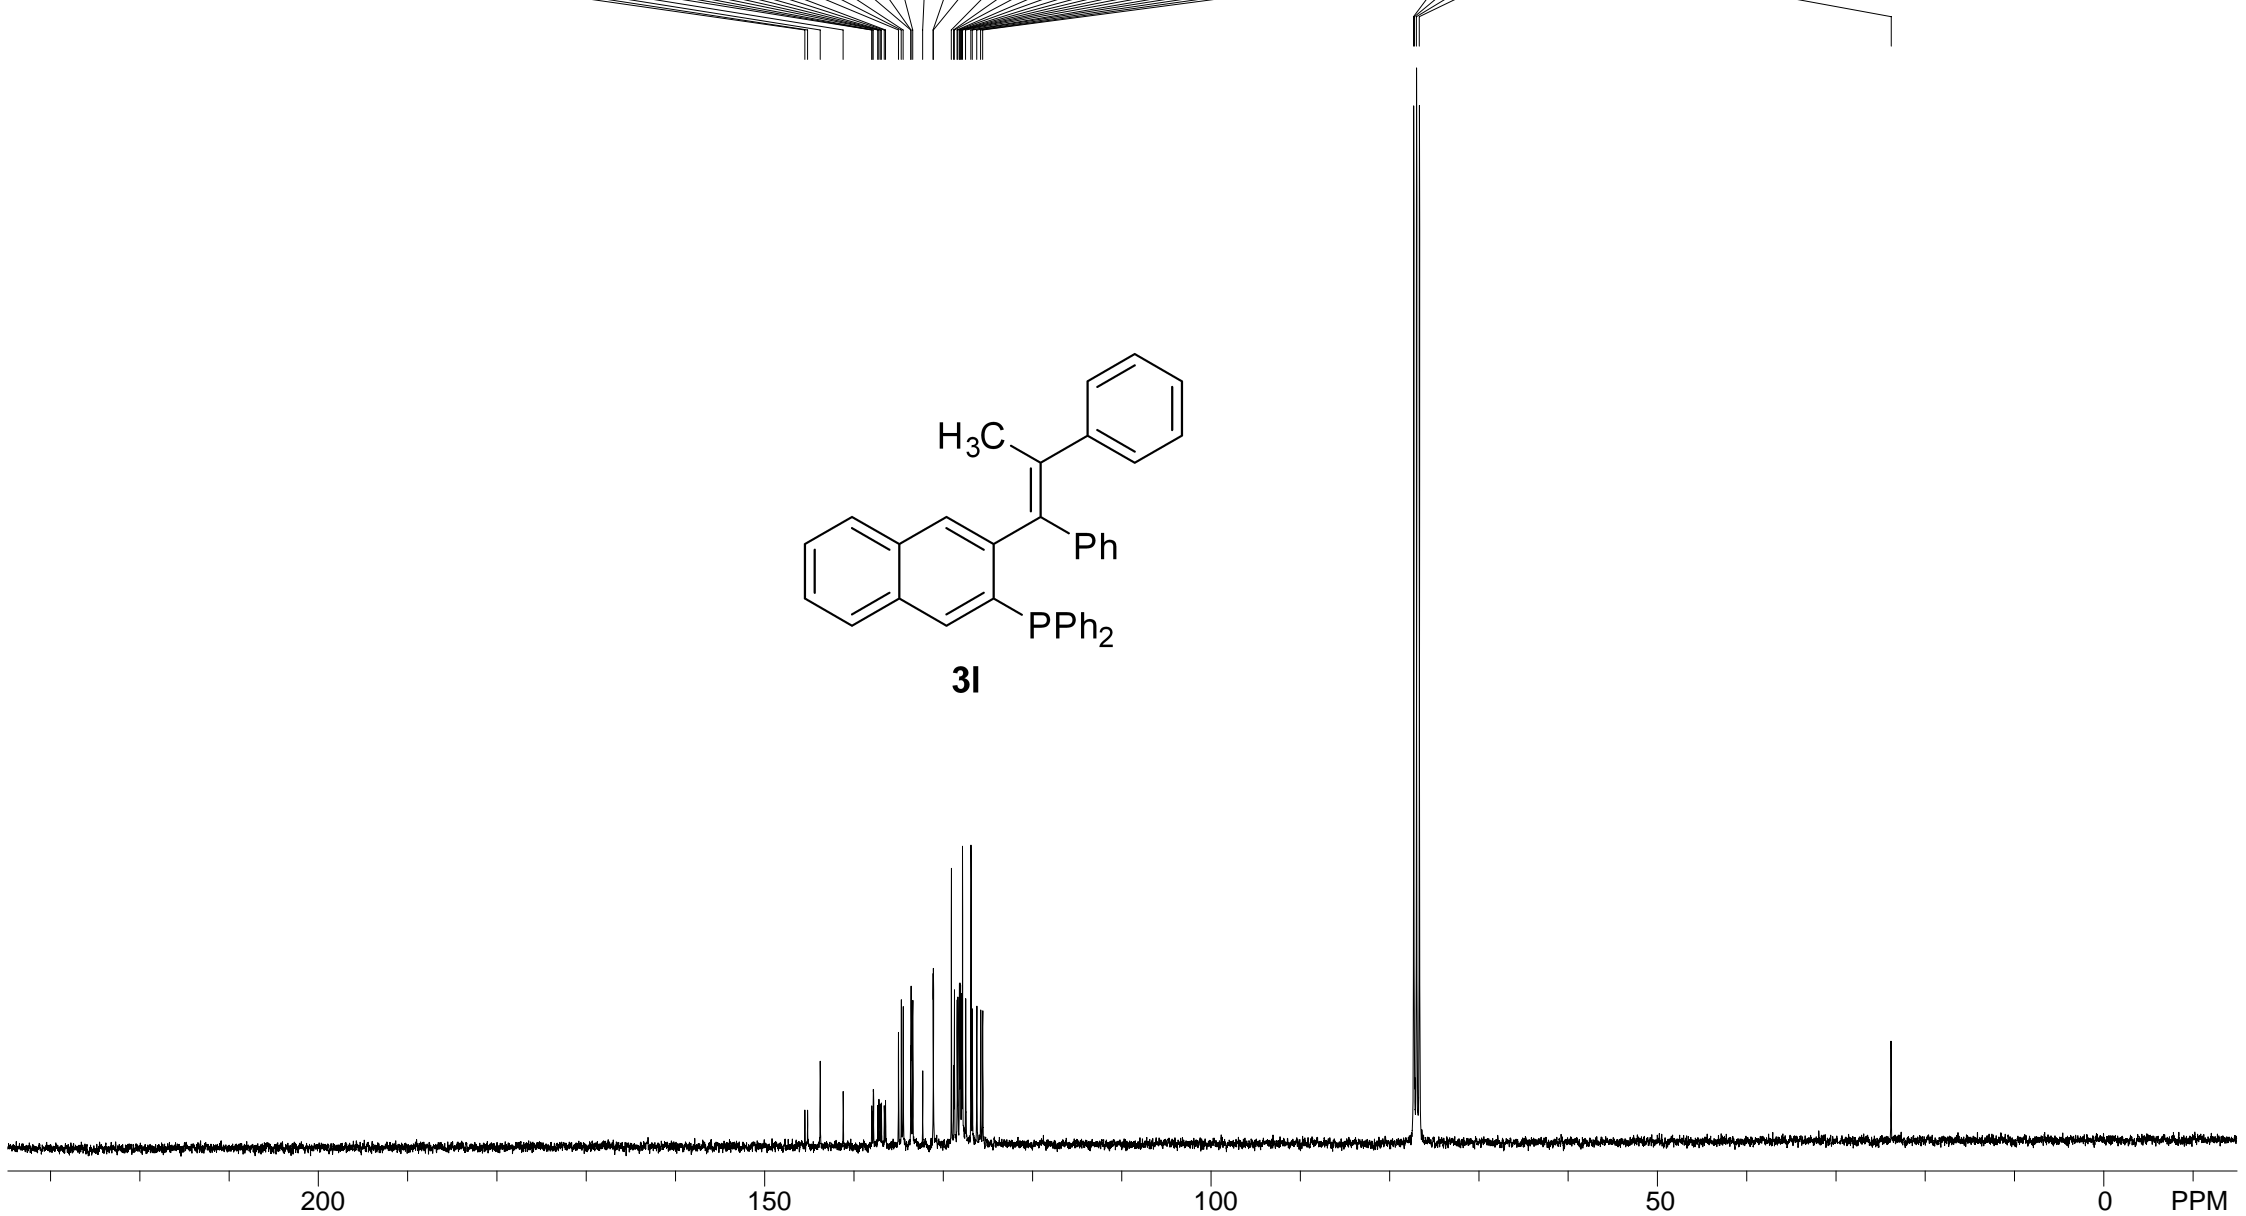

145.501  
145.188

143.780

141.210

138.016  
137.964  
137.835  
137.340  
137.215  
137.050  
136.921  
136.608  
136.469  
135.015  
134.699  
134.482  
133.636  
133.607  
133.415

132.301  
131.132  
131.108

129.096  
128.844  
128.750  
128.446  
128.370  
128.198  
128.133  
128.075  
127.952  
127.846  
127.497  
126.902  
126.747  
126.244  
125.810  
125.580

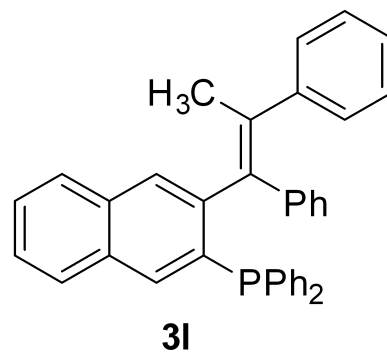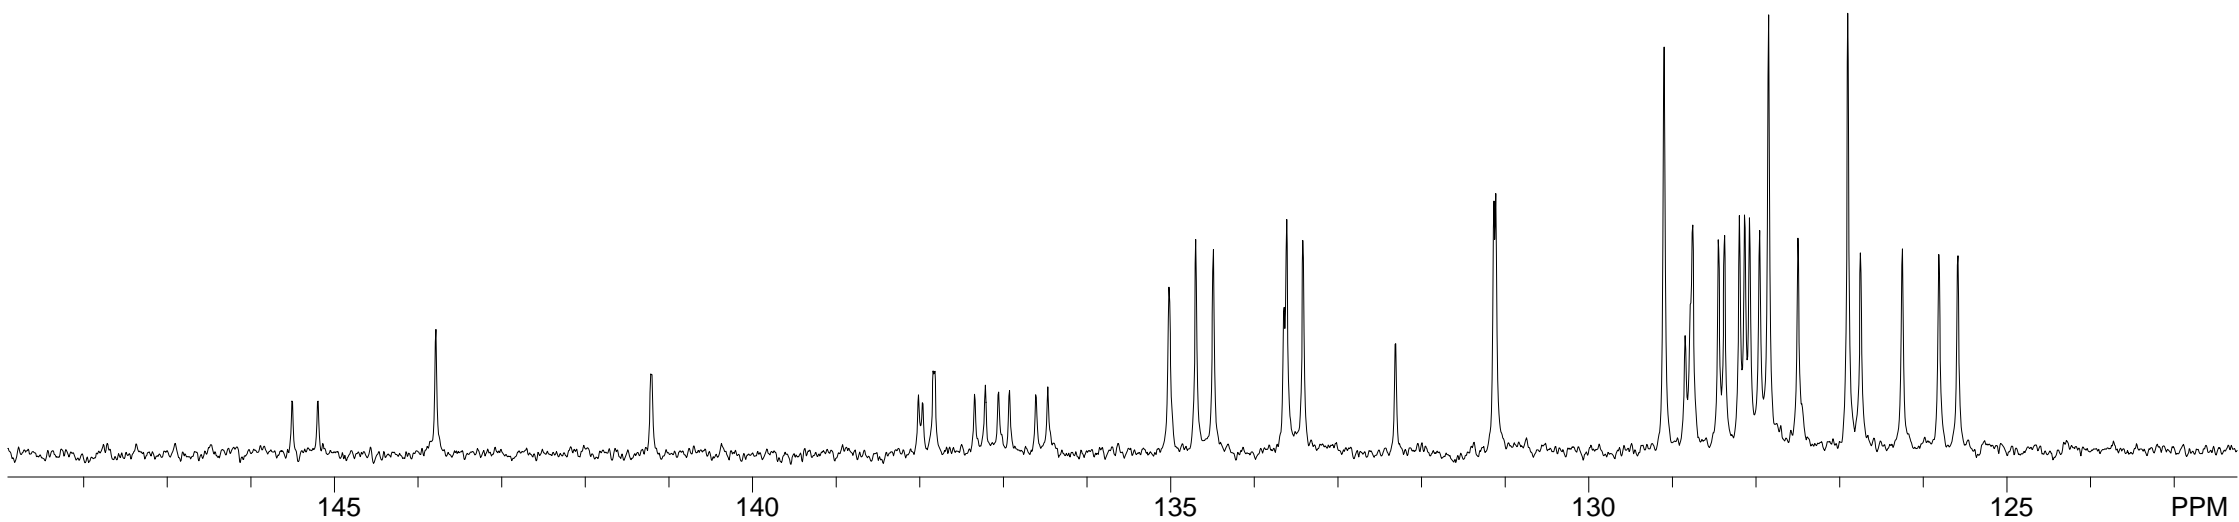



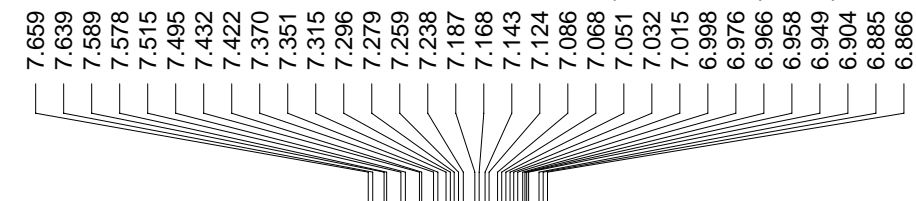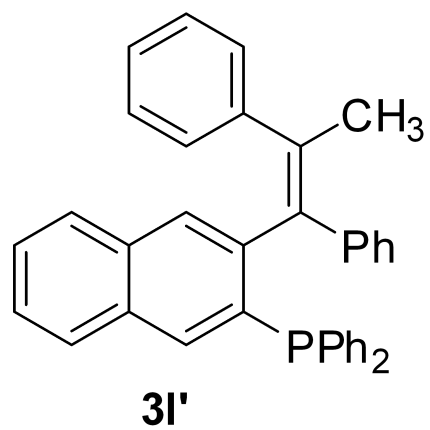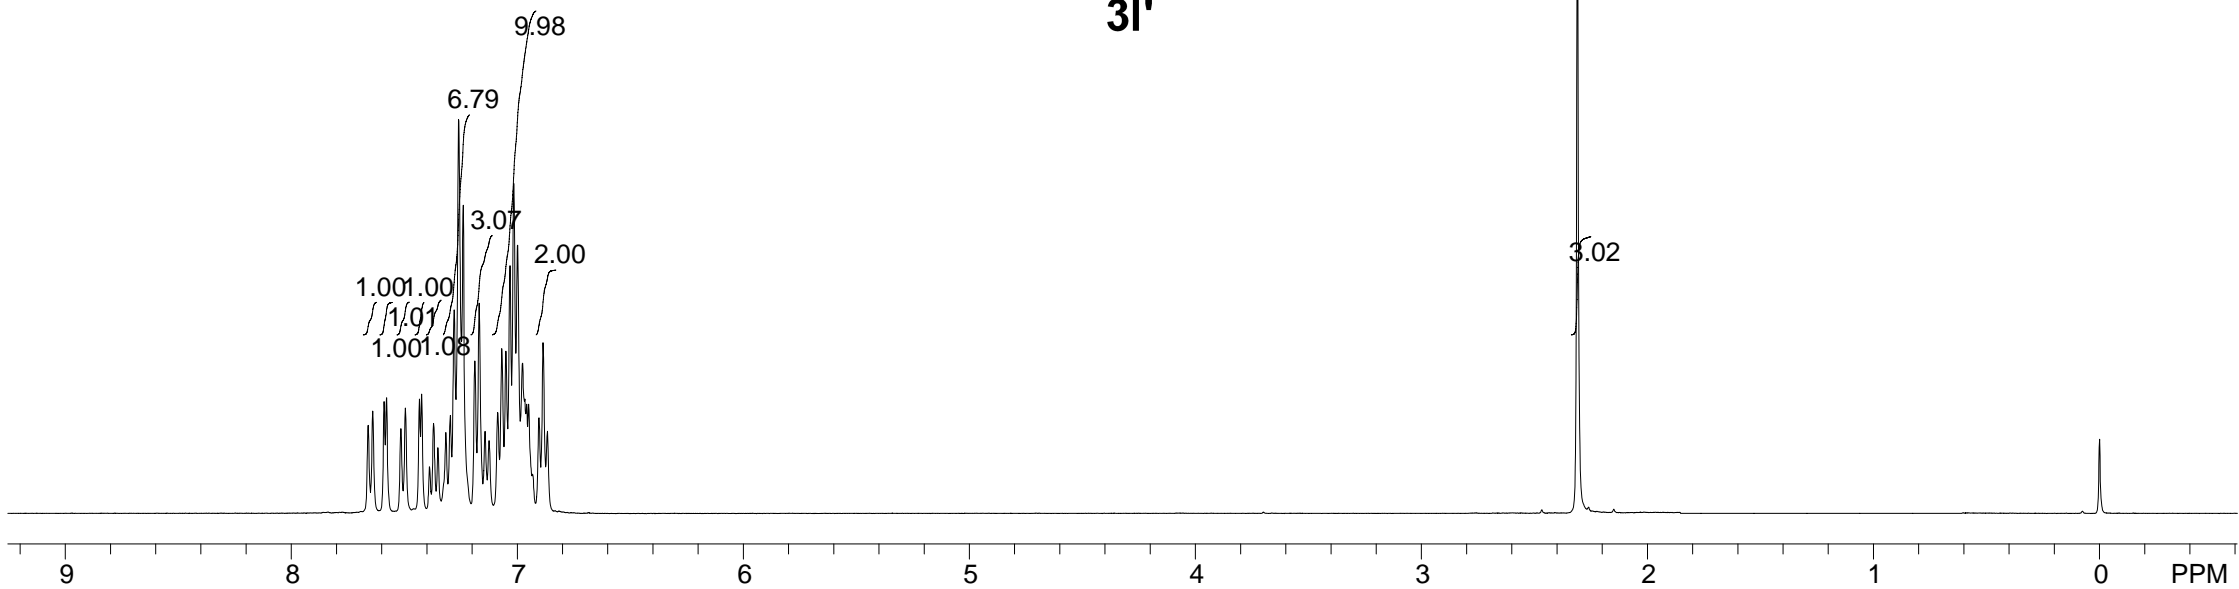

14.087

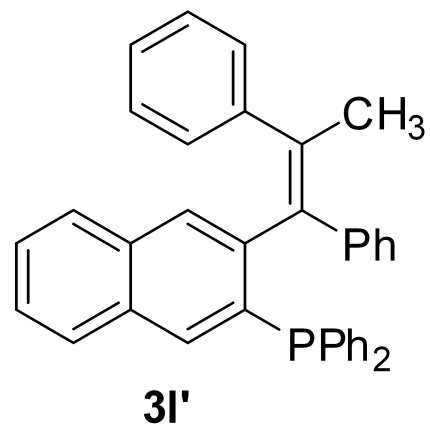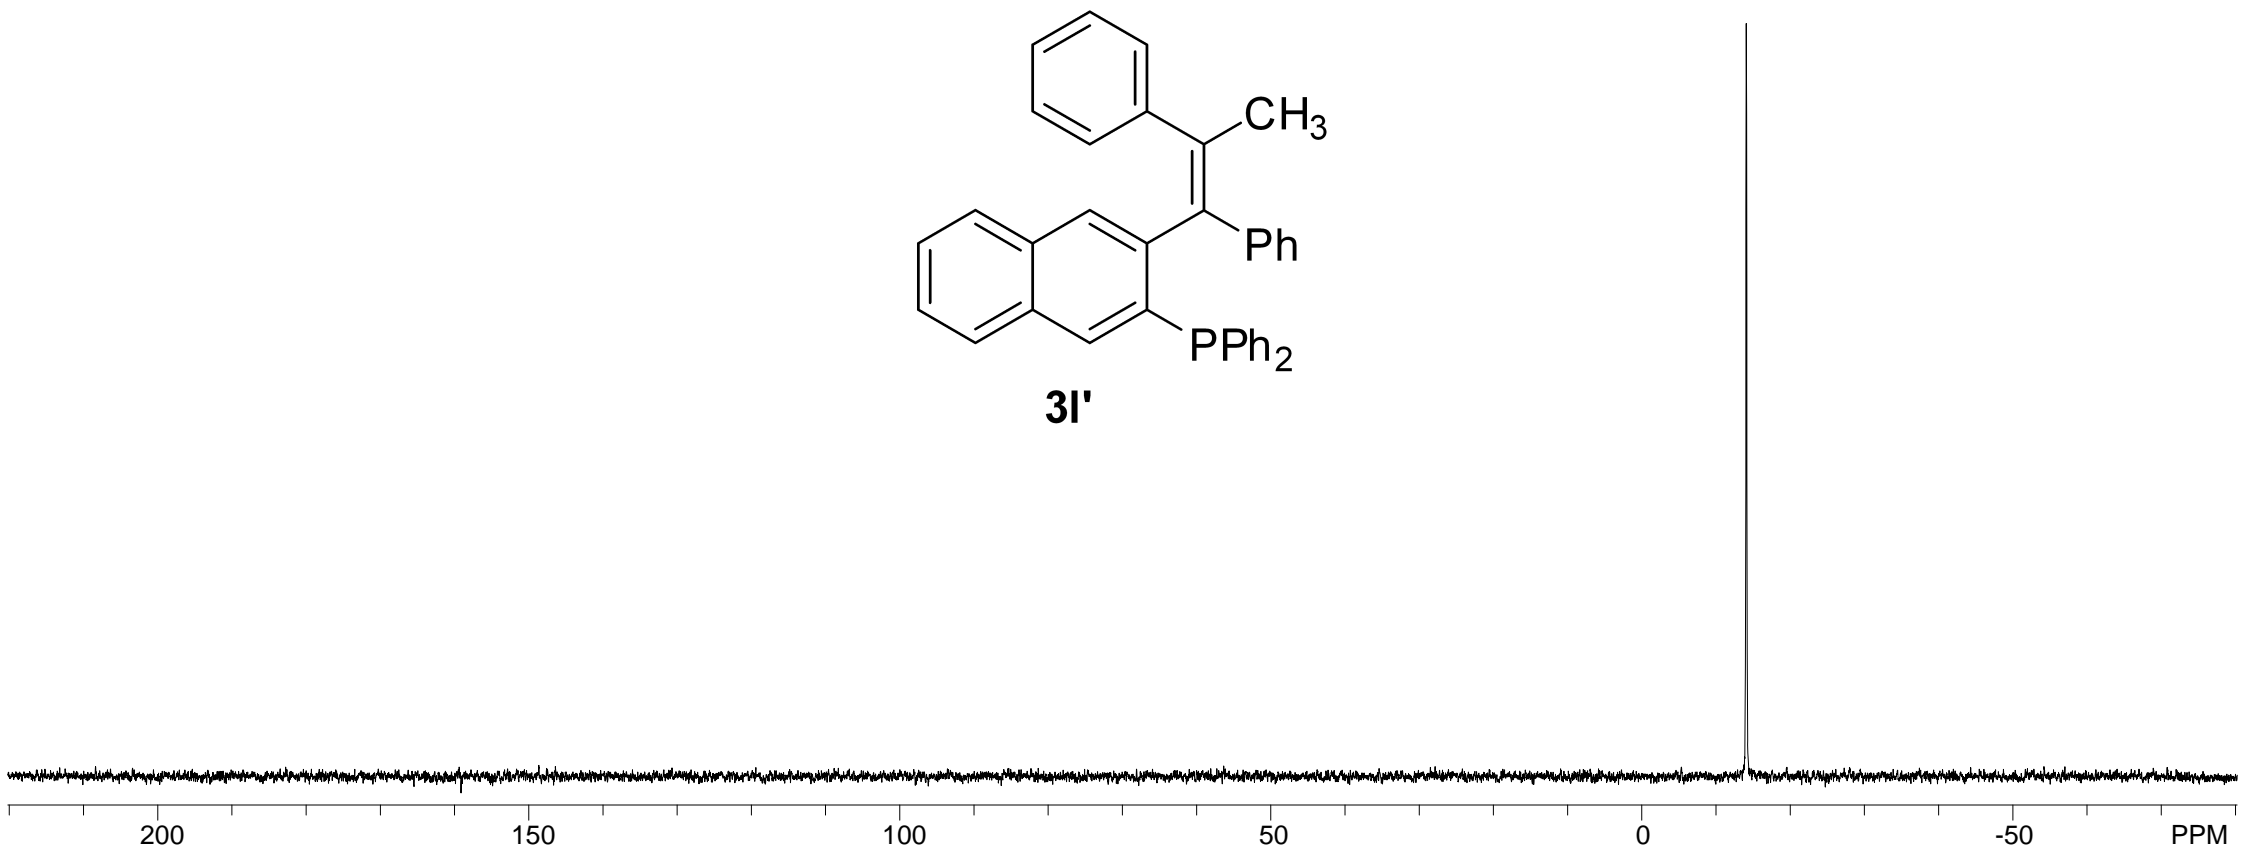

146.353  
146.015  
144.276  
142.008  
139.208  
139.156  
138.914  
138.778  
137.145  
137.026  
136.765  
135.631  
135.500  
133.480  
133.347  
133.283  
133.217  
133.031  
131.985  
130.765  
130.744  
130.621  
130.553  
129.091  
128.225  
128.170  
127.915  
127.847  
127.811  
127.770  
127.580  
127.446  
126.583  
126.238  
125.972  
125.460  
77.309  
77.205  
77.000  
76.681

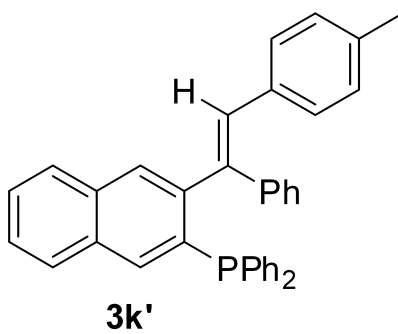

22.995

200

150

100

50

0

PPM

146.353  
146.015

144.276

142.008

139.208  
139.156  
138.914  
138.778

137.145  
137.026  
136.765

135.631  
135.500

133.480  
133.347  
133.283  
133.217  
133.031  
131.985

130.765  
130.744  
130.621  
130.553

129.091  
128.225  
128.170  
127.915  
127.847  
127.811  
127.770  
127.580  
127.446  
126.583  
126.238  
125.972  
125.460

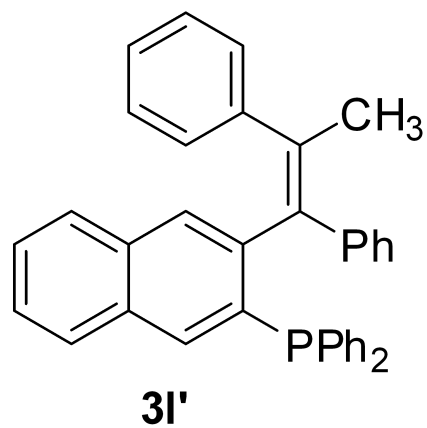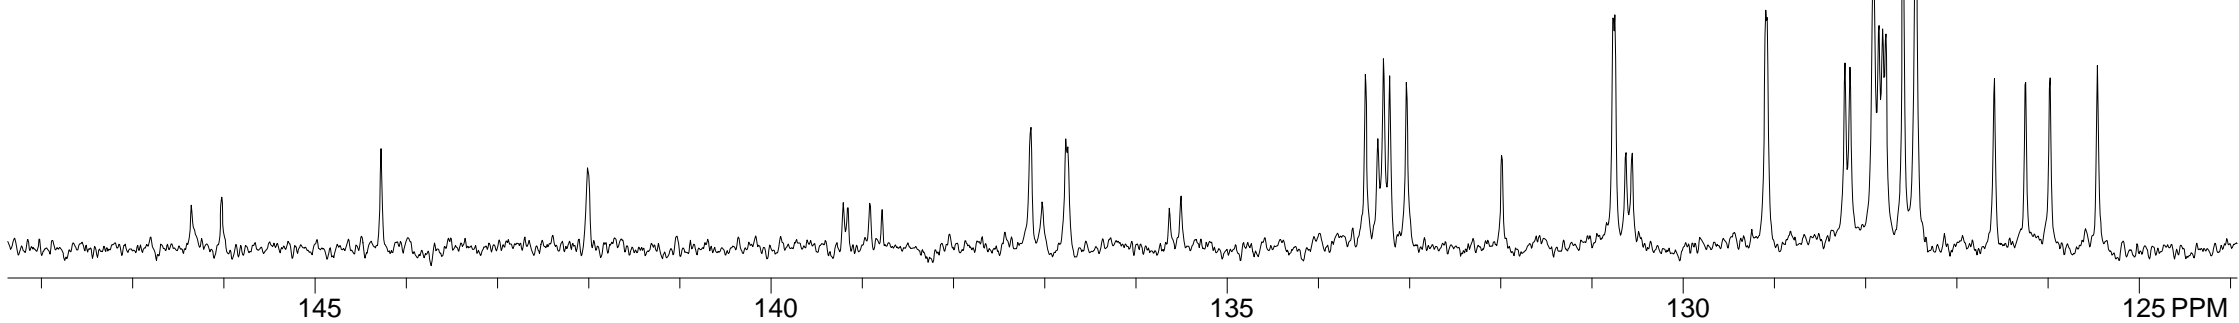

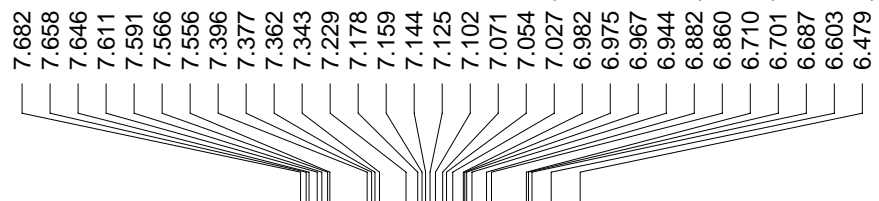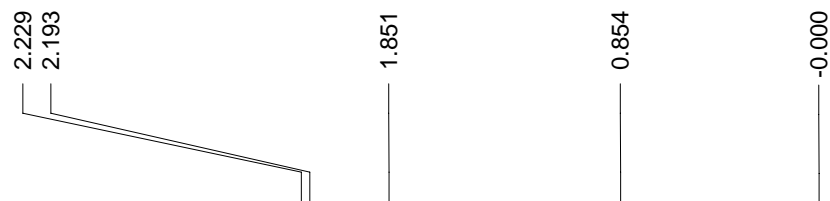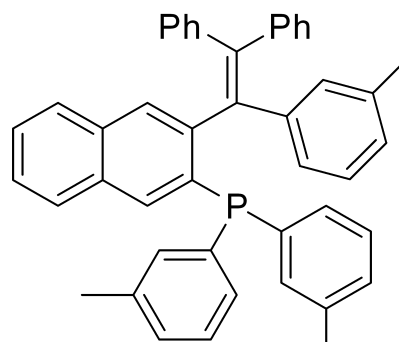

**3m**

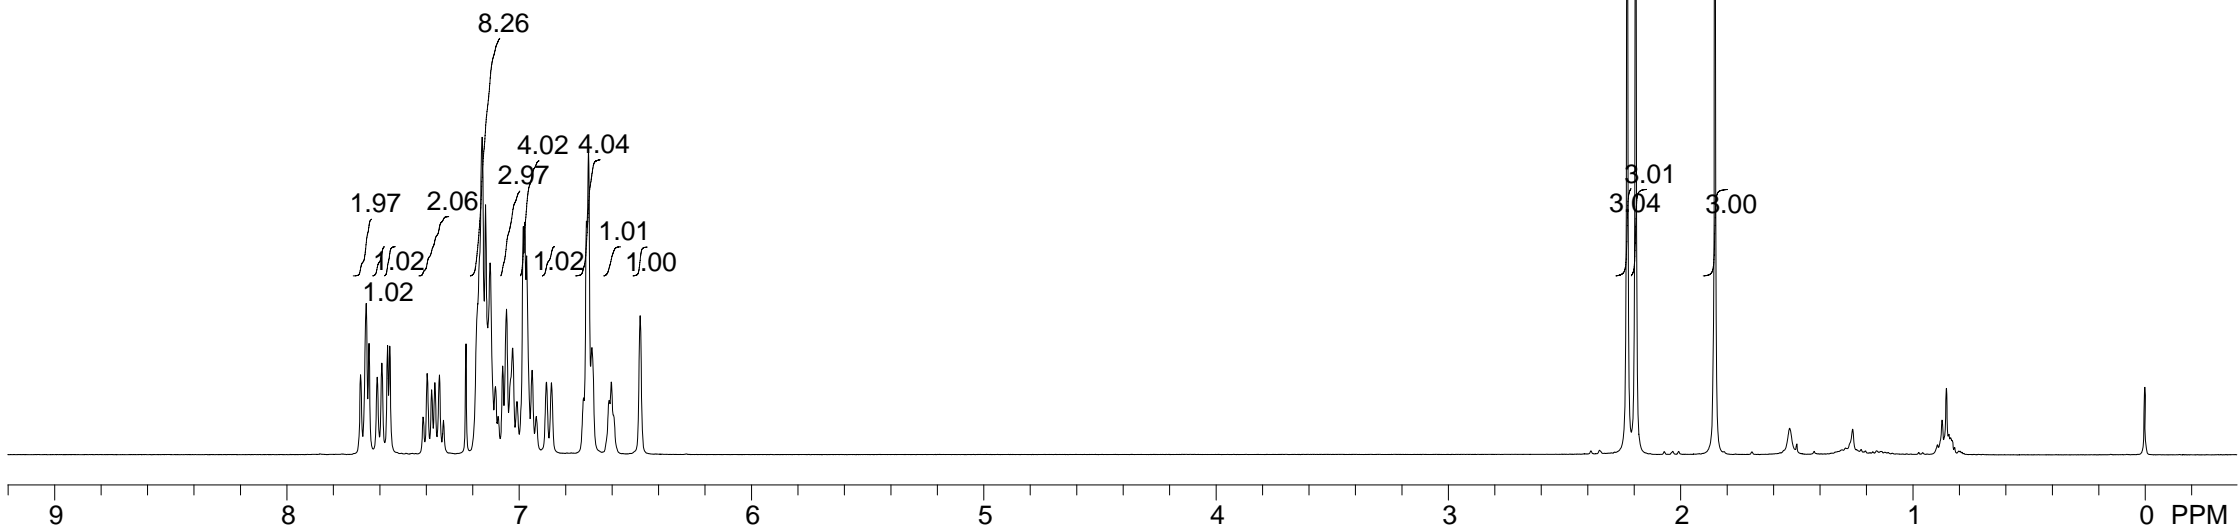

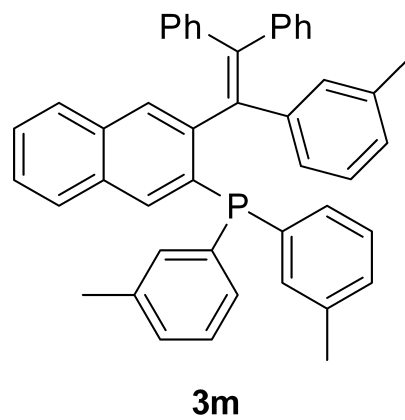

13.666

200

150

100

50

0

-50

PPM

S86

146.796  
146.477  
143.867  
143.842  
142.718  
141.921  
140.635  
140.581  
139.145  
139.015  
137.549  
137.489  
137.384  
137.298  
136.720  
136.613  
136.498  
136.427  
136.286  
135.061  
134.806  
133.552  
133.456  
133.343  
132.254  
131.483  
131.104  
130.926  
130.774  
130.715  
129.931  
129.768  
129.186  
128.877  
128.430  
127.960  
127.845  
127.772  
127.626  
127.551  
127.302  
126.795  
126.762  
126.514  
126.410  
126.181  
125.515  
77.325  
77.207  
77.000  
76.687  
21.484  
21.375  
21.072

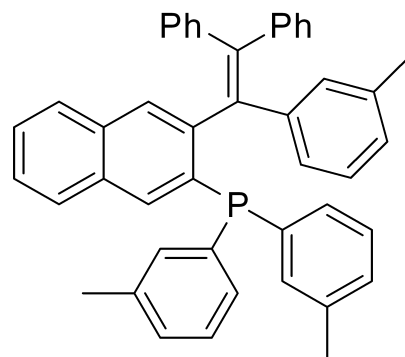

**3m**

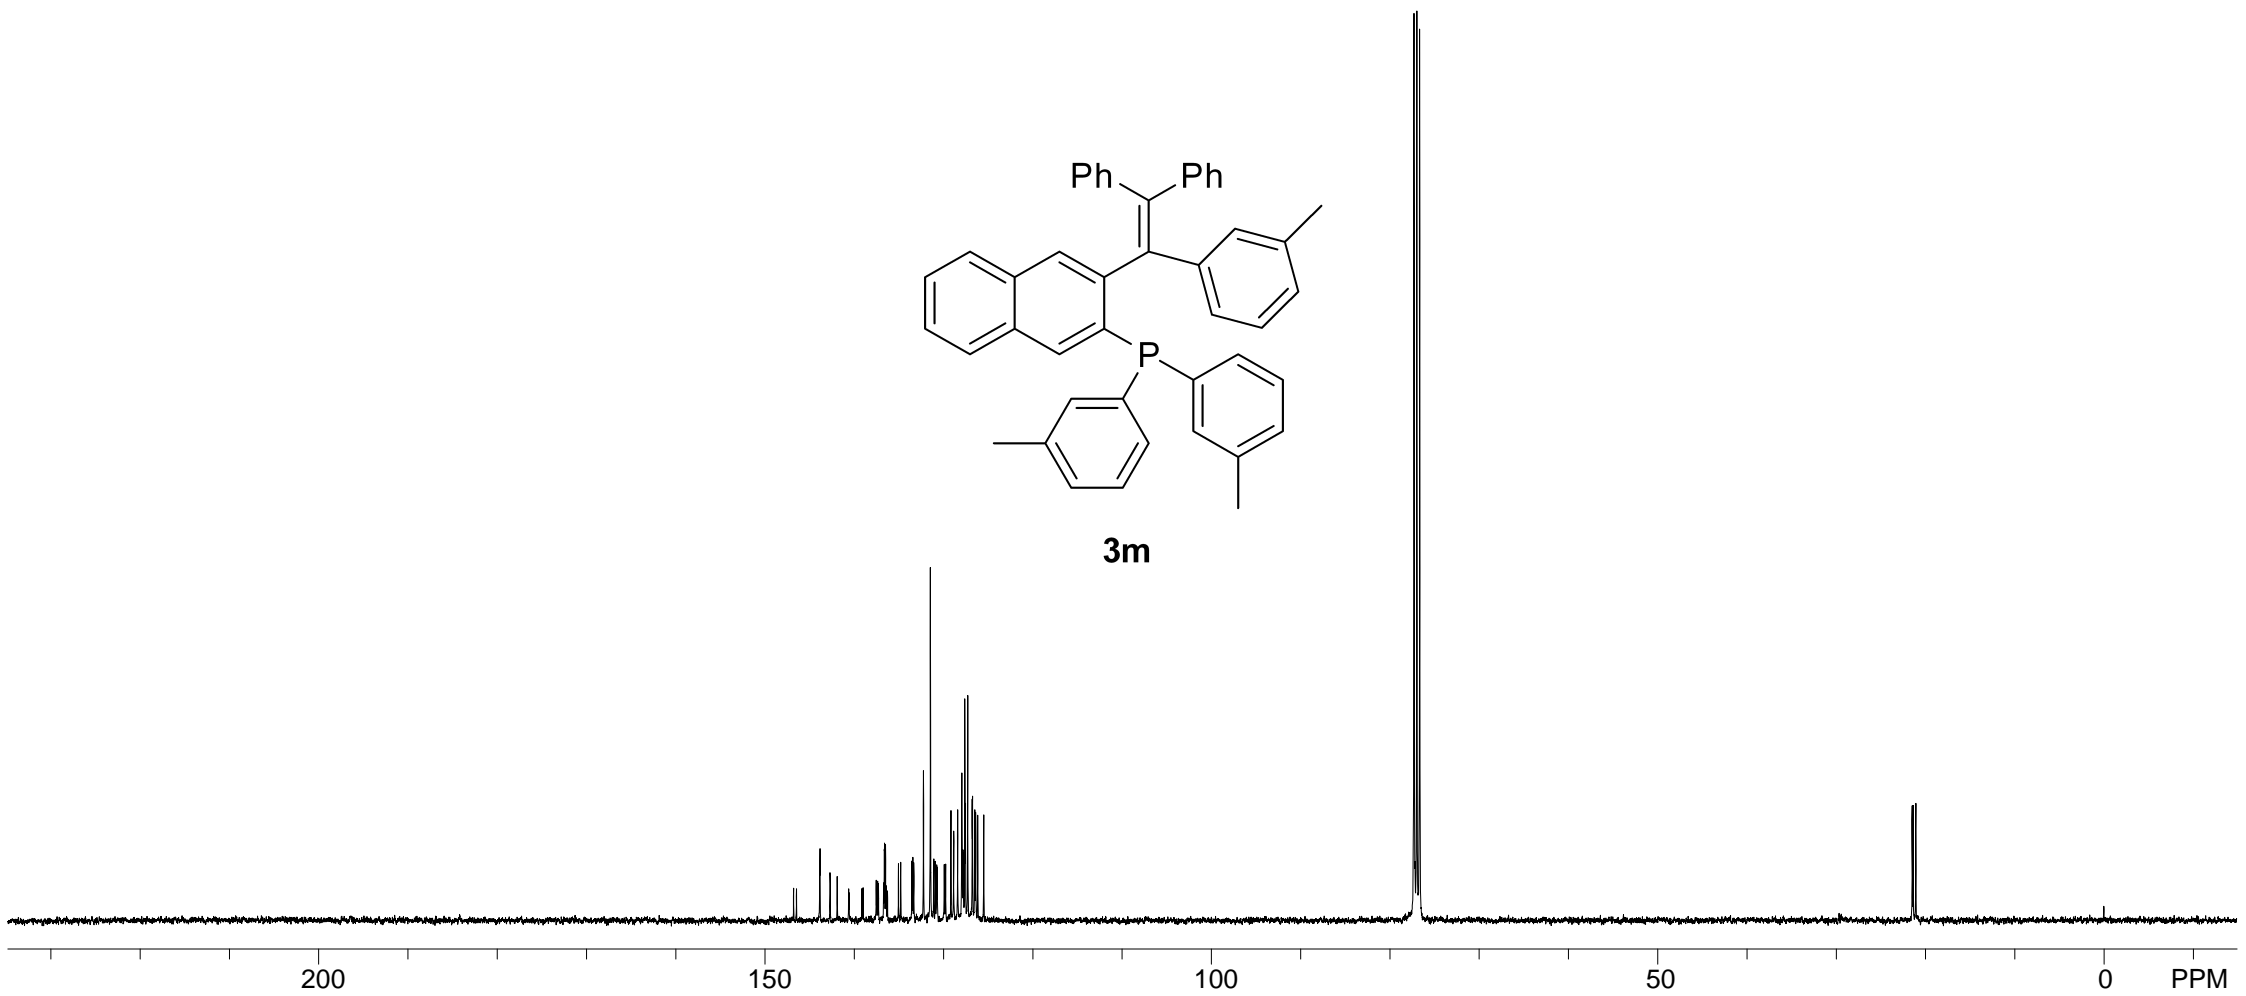

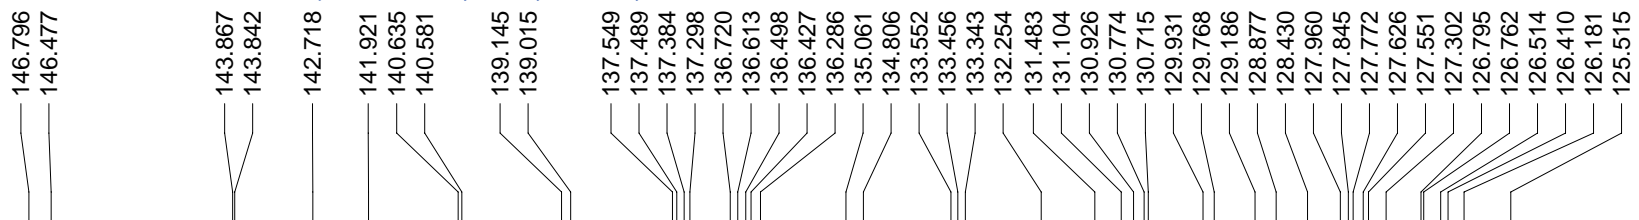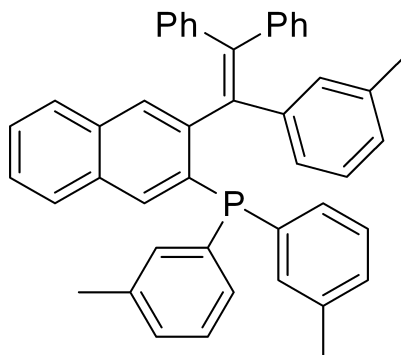

**3m**

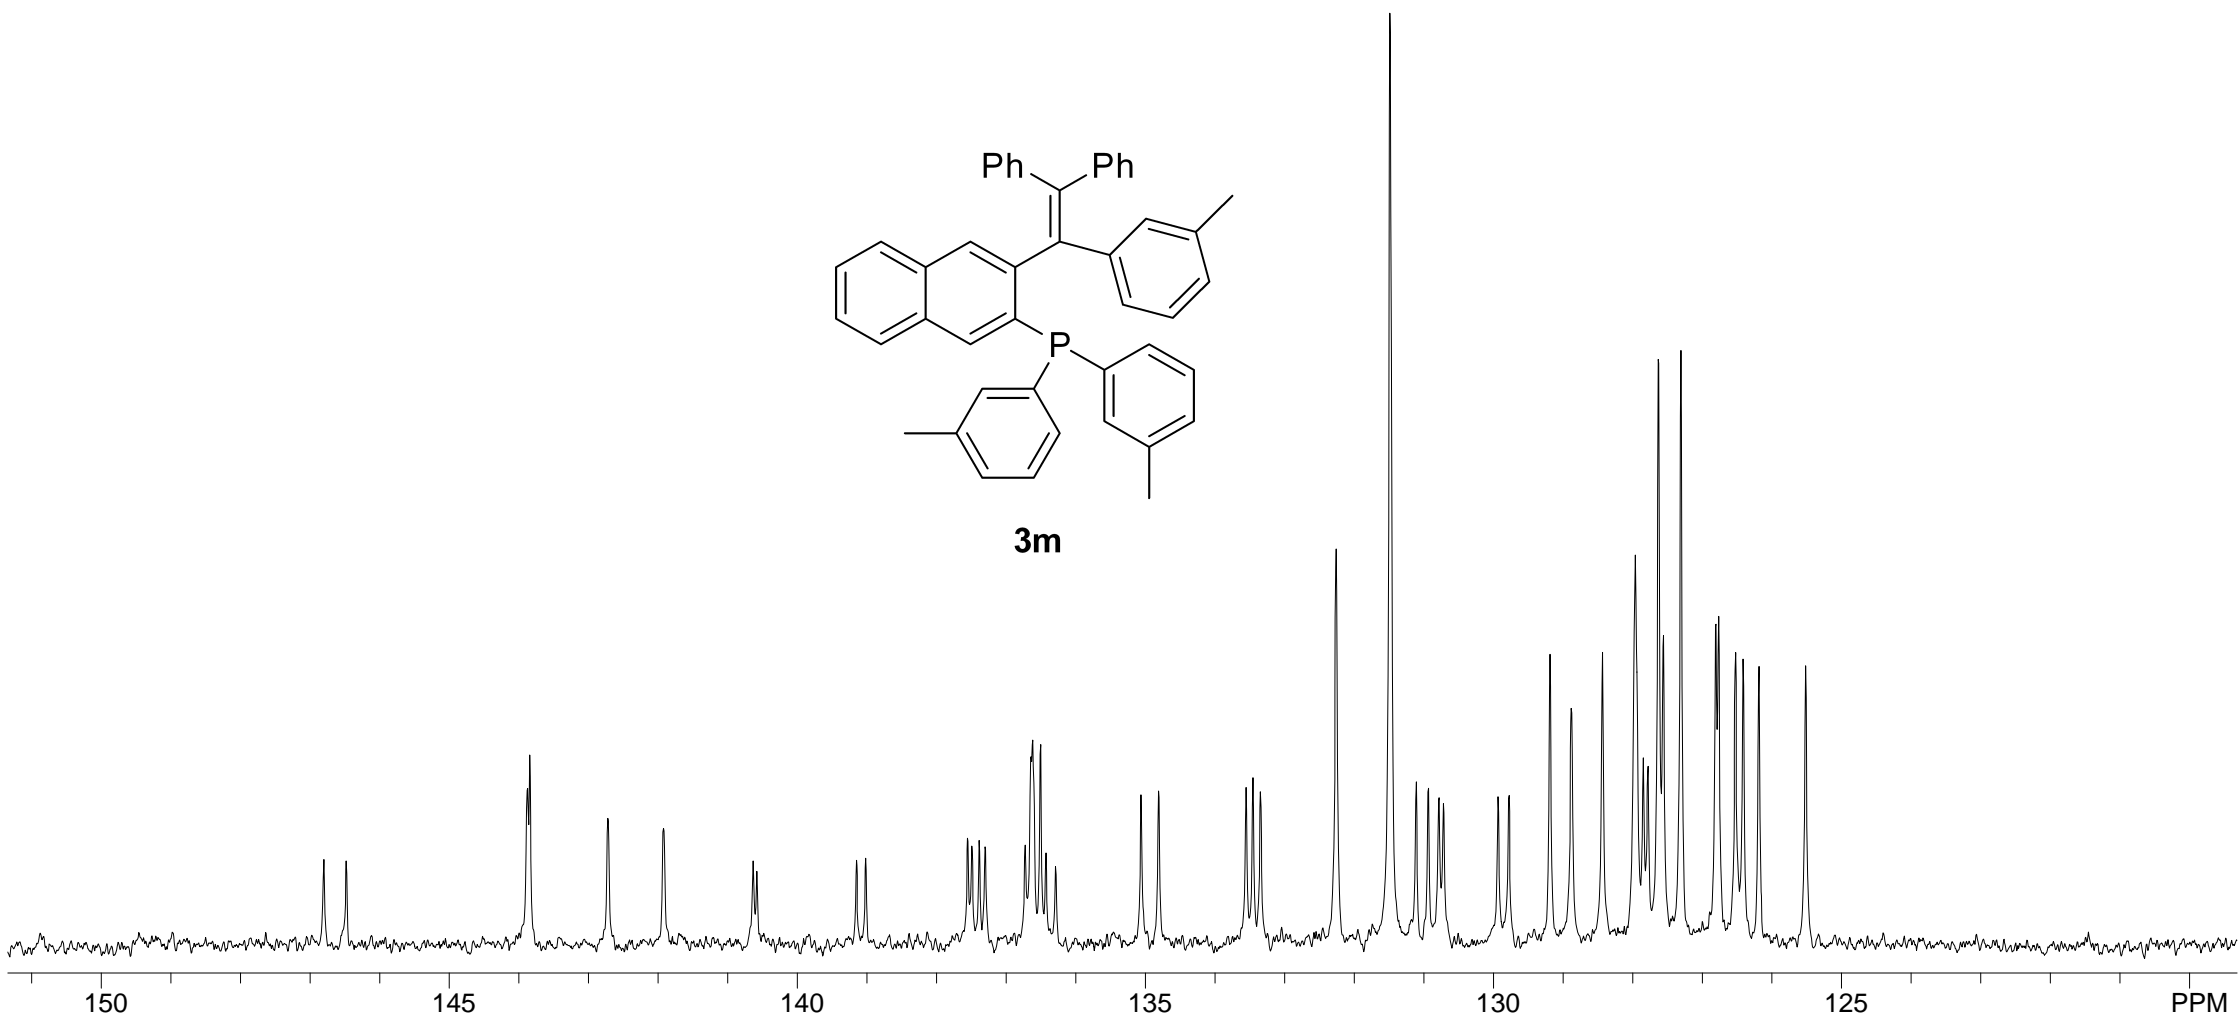



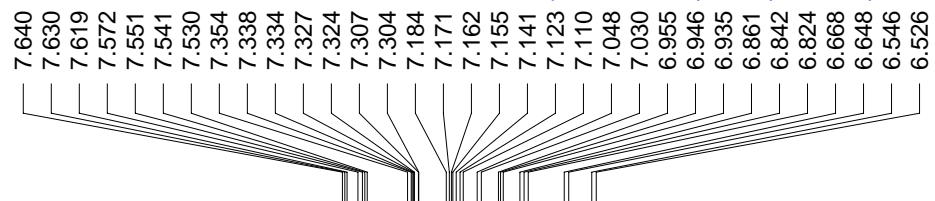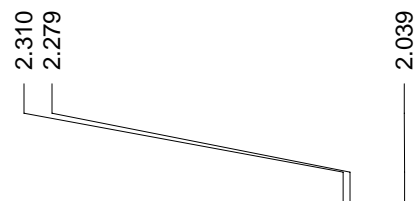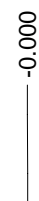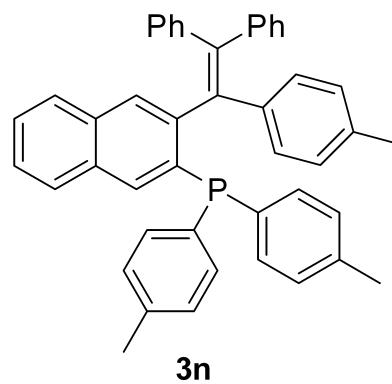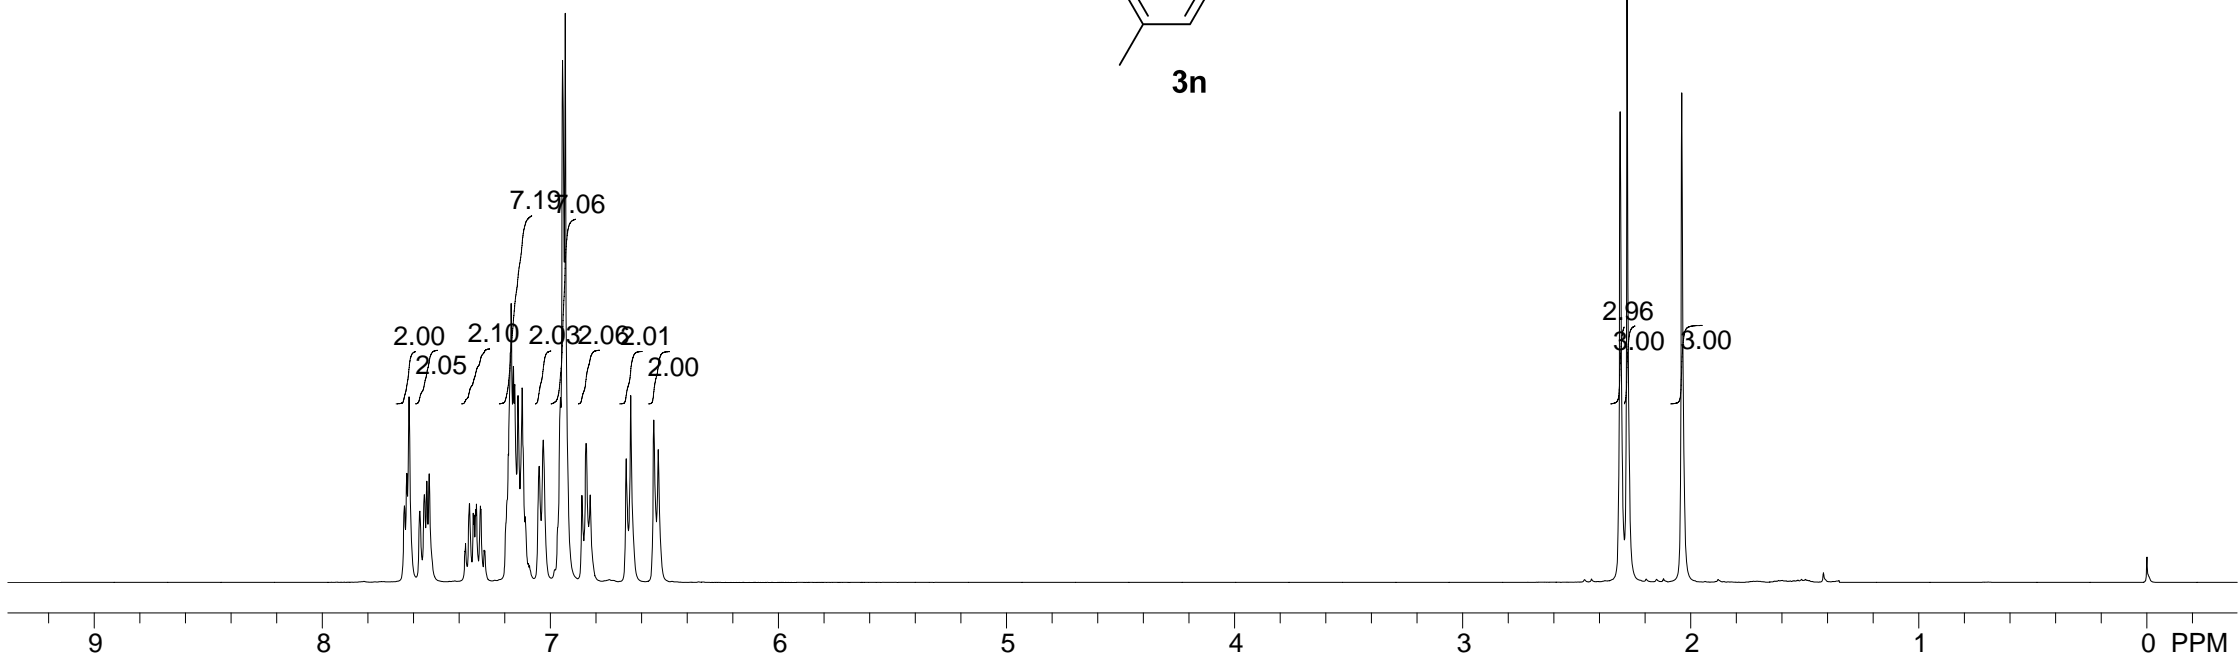

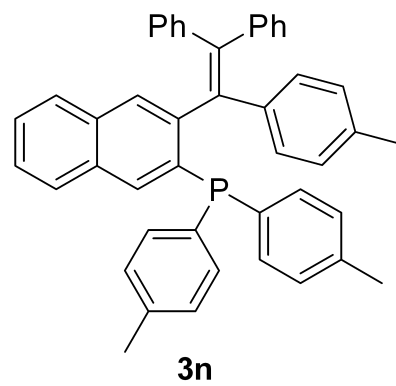

15.496

200

150

100

50

0

-50

PPM

S90

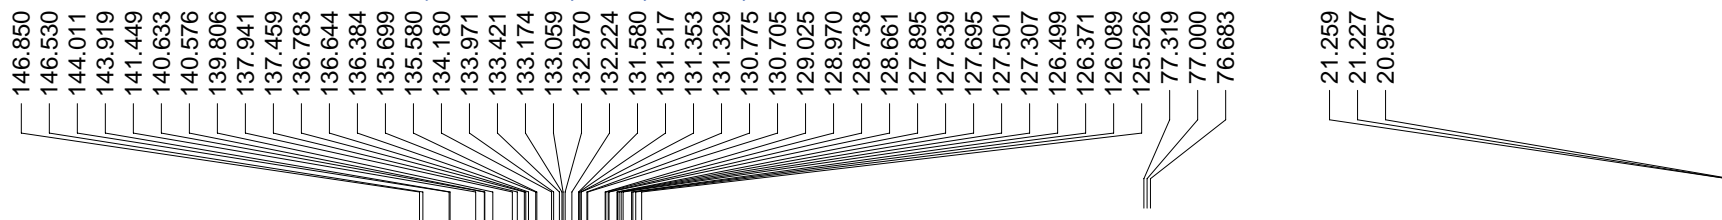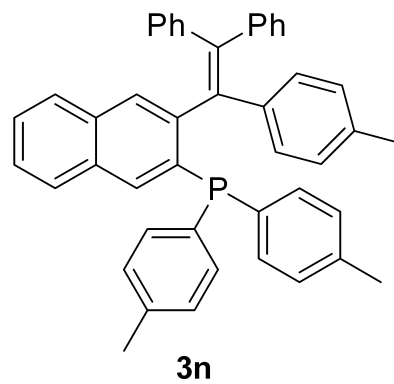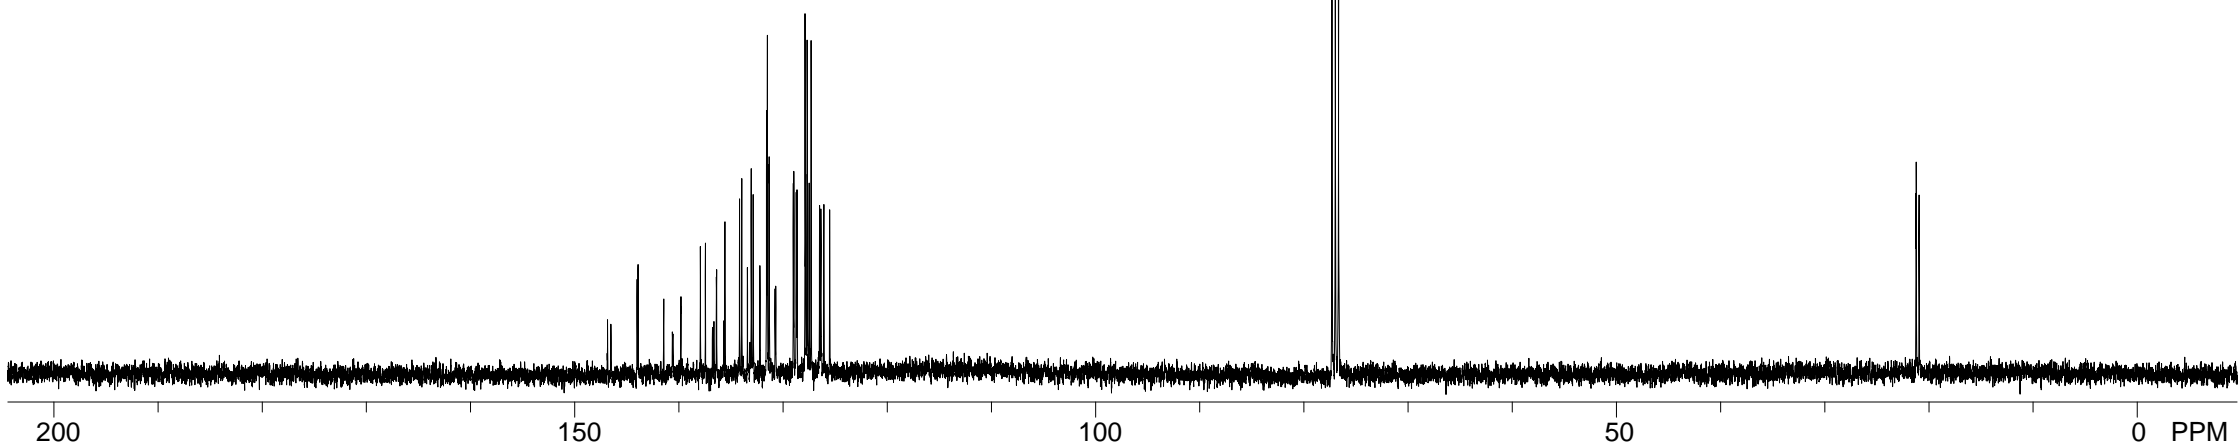

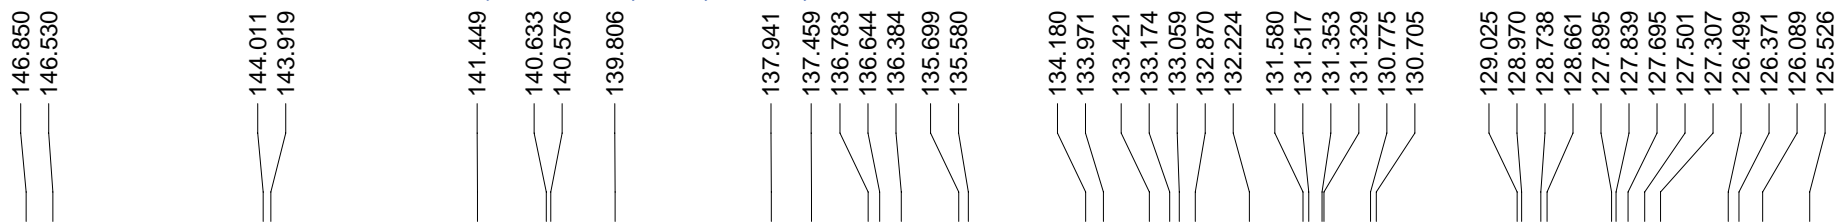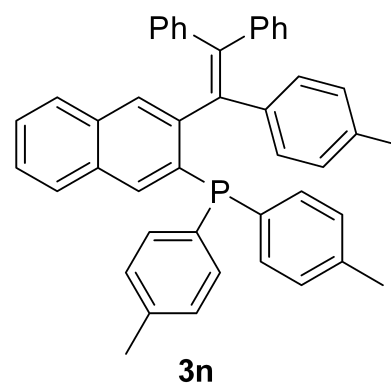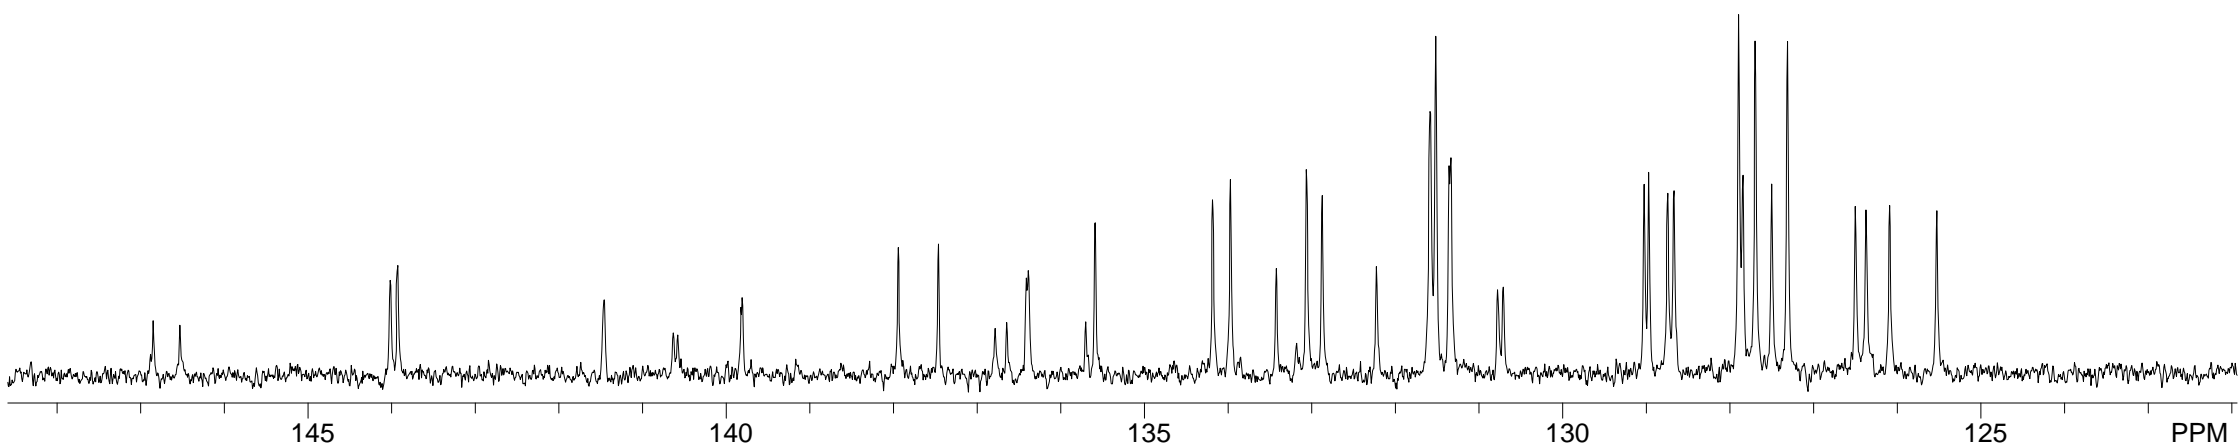

7.634  
7.614  
7.604  
7.560  
7.498  
7.488  
7.357  
7.336  
7.315  
7.200  
7.181  
7.151  
7.132  
7.005  
6.985  
6.974  
6.965  
6.956  
6.930  
6.909  
6.893  
6.816  
6.794  
6.682  
6.661  
6.256  
6.236

3.765  
3.731  
3.547

0.000

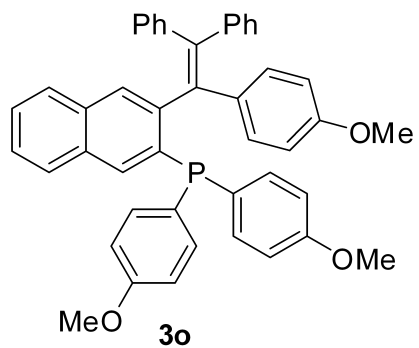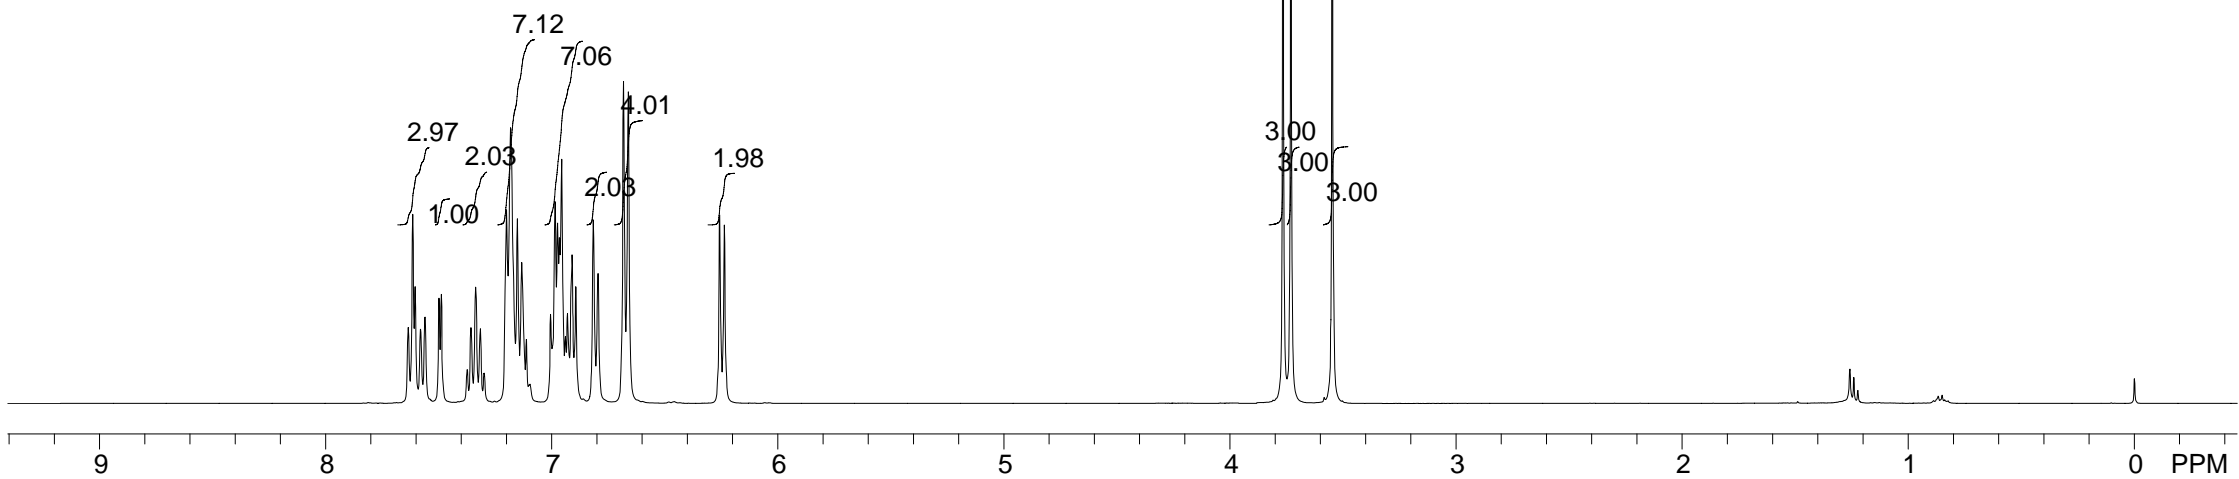

16.750

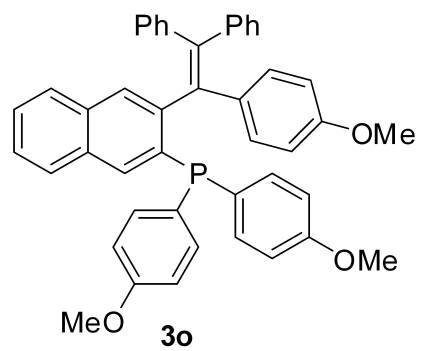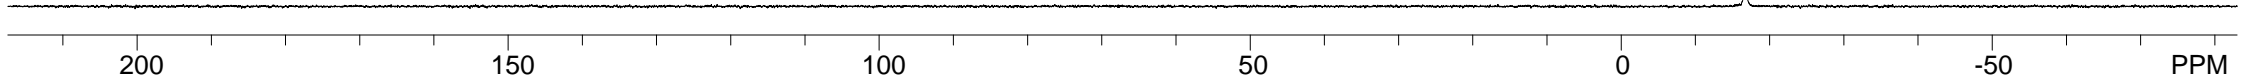

159.749  
159.502  
157.589  
  
146.561  
146.248  
144.097  
143.933  
140.801  
140.284  
140.231  
137.371  
137.234  
136.007  
135.571  
135.342  
135.004  
134.990  
134.407  
134.211  
133.335  
132.887  
132.177  
131.505  
131.211  
131.191  
130.748  
130.689  
130.102  
129.993  
127.783  
127.734  
127.449  
127.386  
127.291  
126.469  
126.313  
126.022  
125.561  
113.992  
113.930  
113.593  
113.506  
112.514  
77.316  
77.000  
76.684  
55.102  
55.013  
54.679

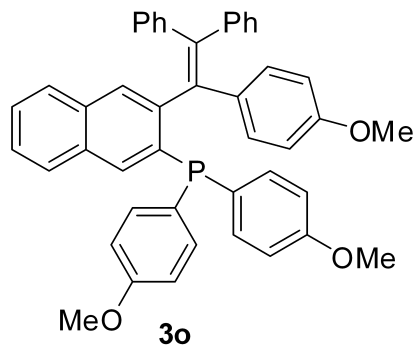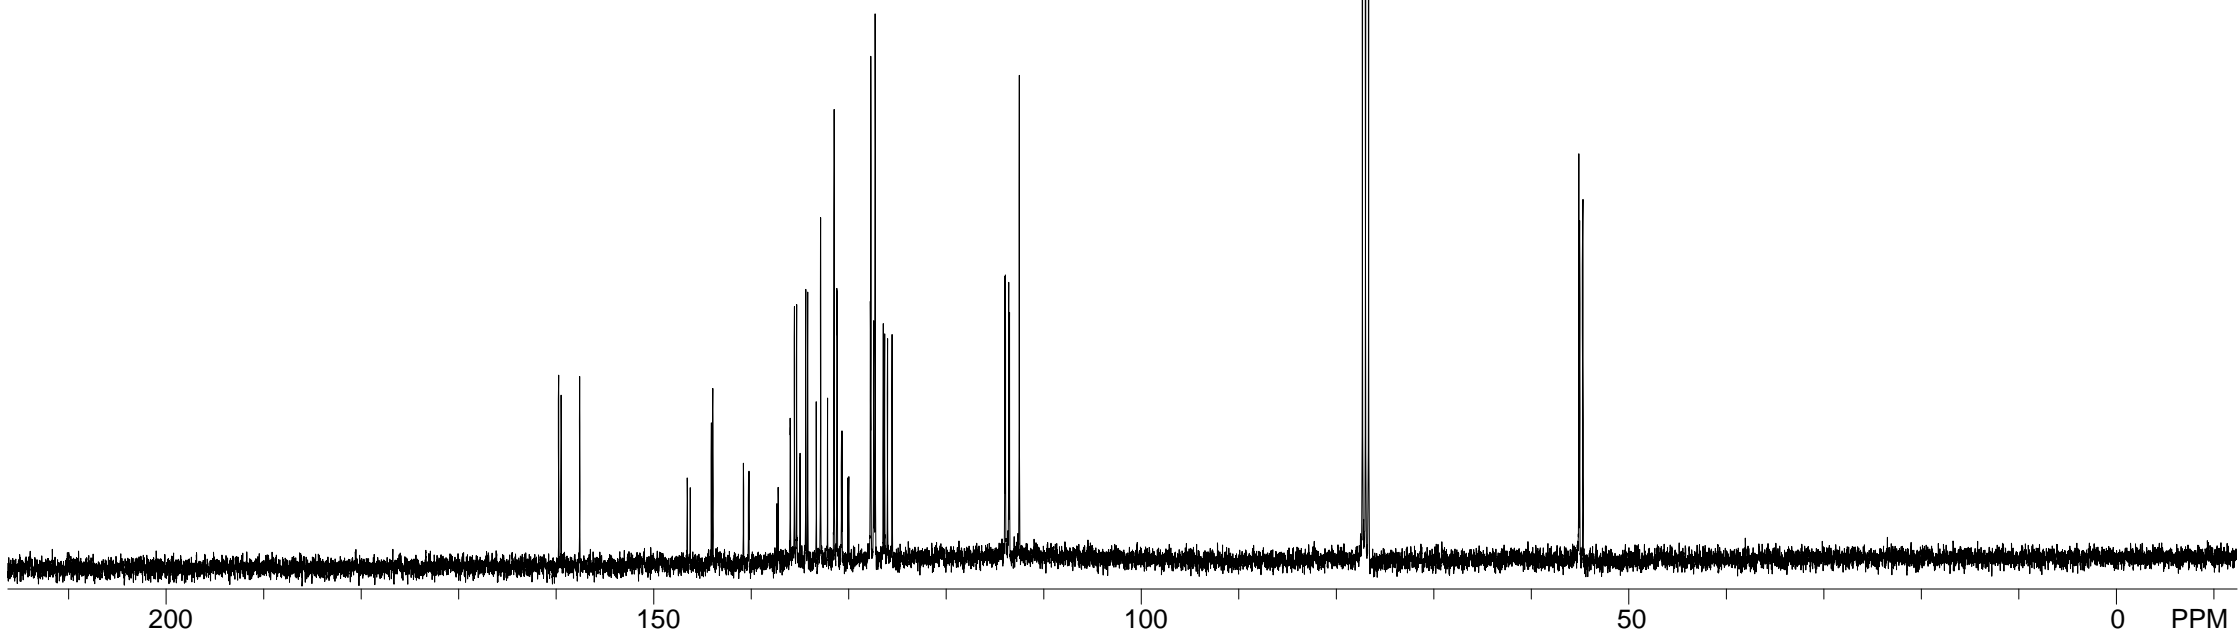

159.749  
159.502

157.589

146.561

146.248

144.097

143.933

140.801

140.284

140.231

137.371

137.234

136.007

135.571

135.342

135.004

134.990

134.407

134.211

133.335

132.887

132.177

131.505

131.211

131.191

130.748

130.689

130.102

129.993

127.783

127.734

127.449

127.386

127.291

126.469

126.313

126.022

125.561

113.992

113.930

113.593

113.506

112.514

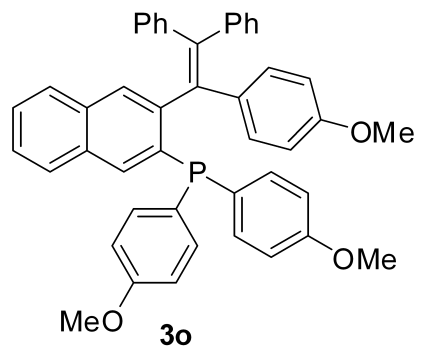

160

150

140

130

120

110 PPM



7.666  
7.649  
7.640  
7.598  
7.577  
7.465  
7.455  
7.424  
7.407  
7.384  
7.363  
7.210  
7.148  
7.045  
7.026  
7.009  
6.983  
6.966  
6.944  
6.930  
6.915  
6.899  
6.891  
6.868  
6.847  
6.760  
6.746  
6.740  
6.725  
6.461  
6.440  
6.418

0.000

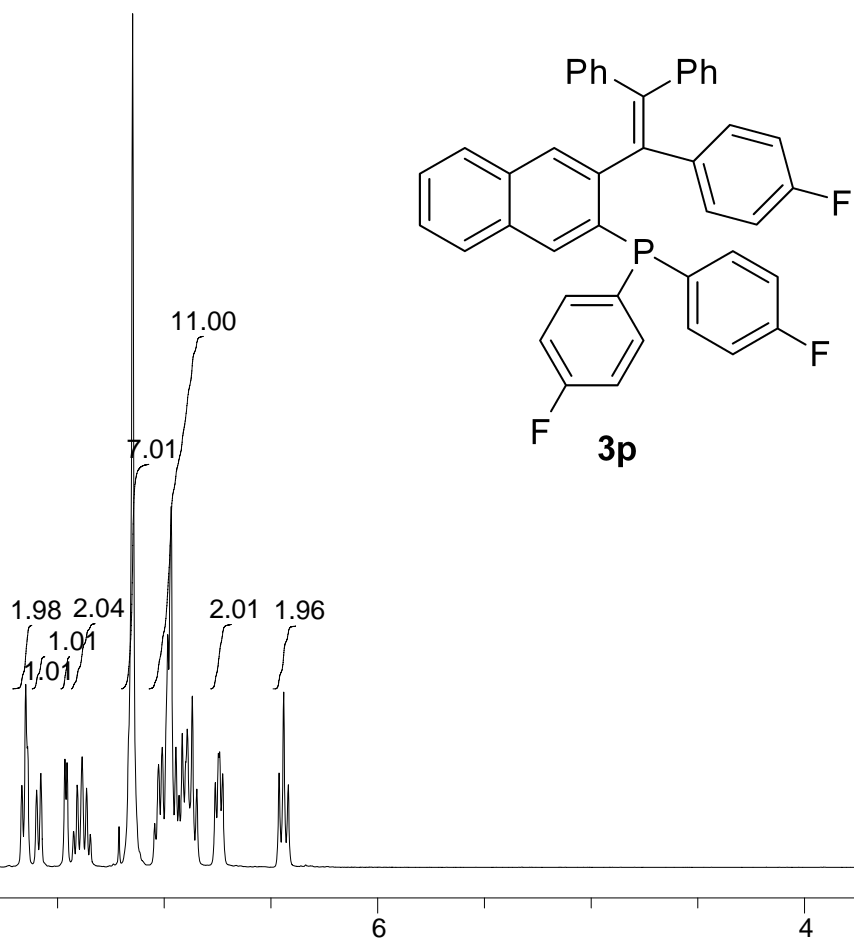

16.082

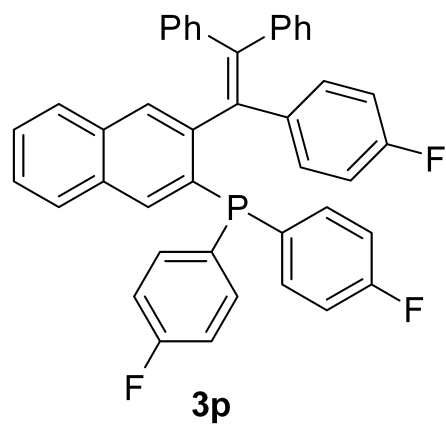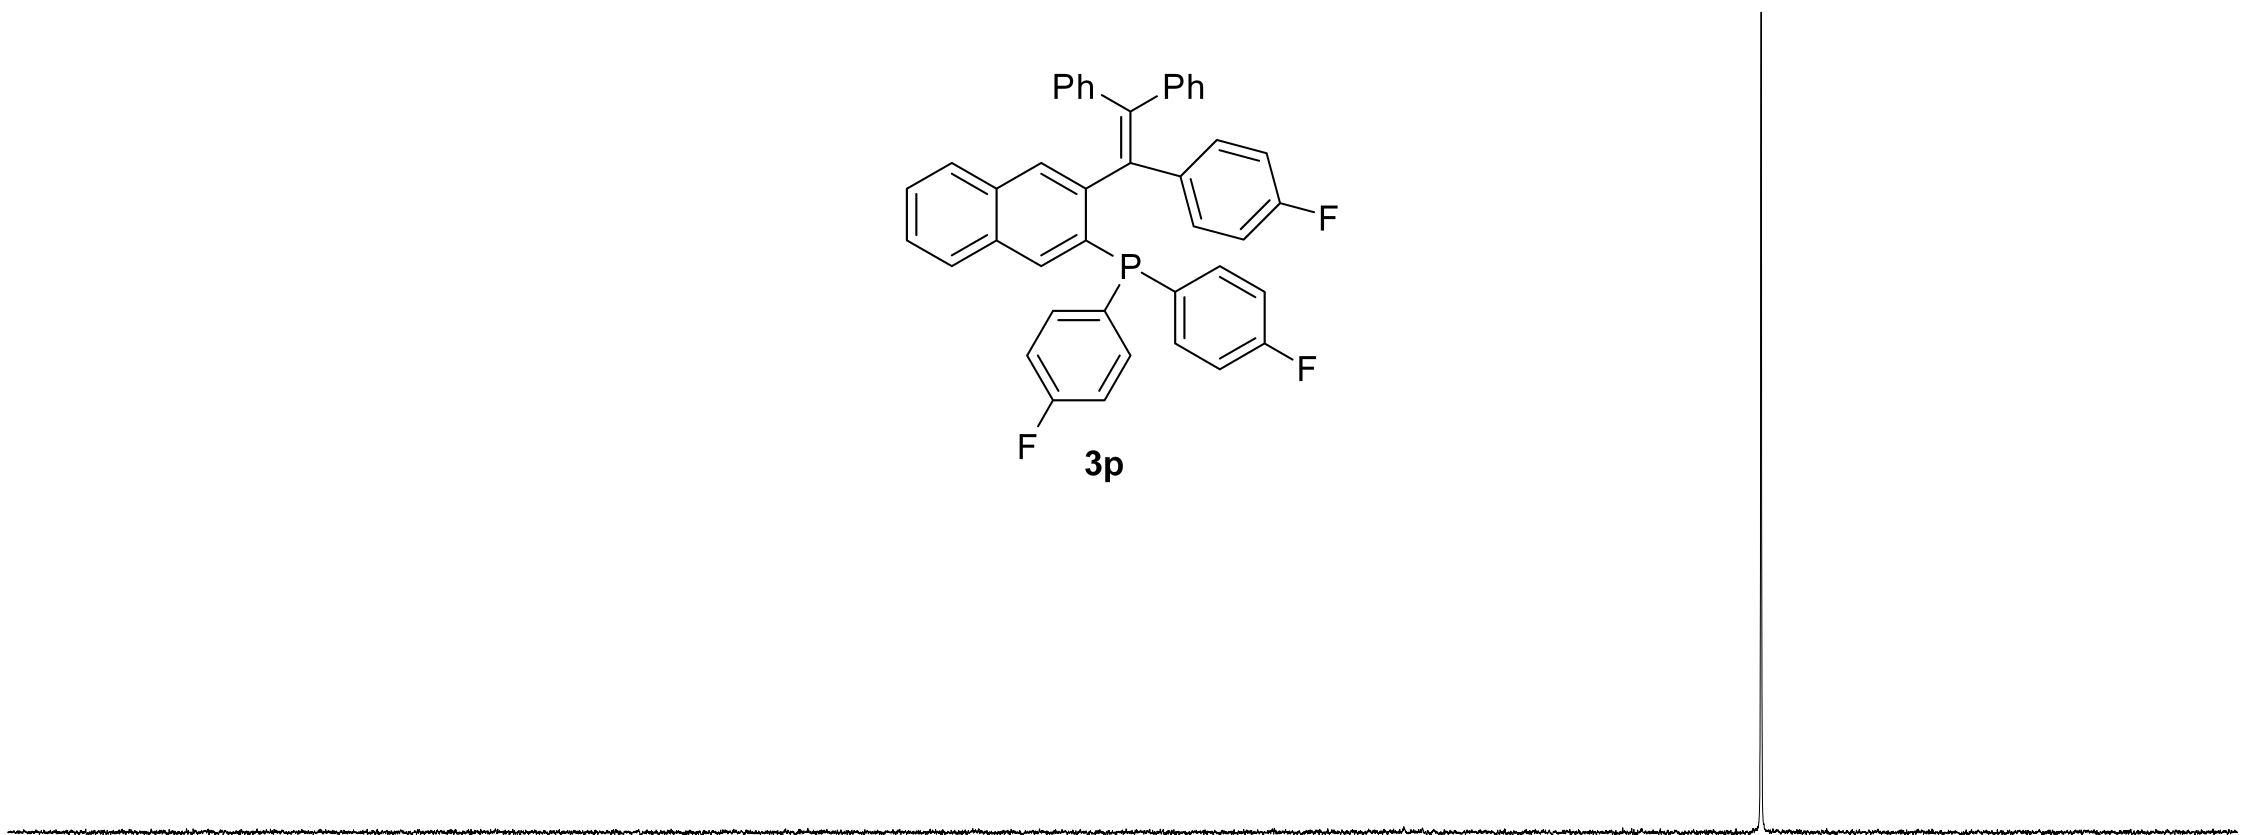

200

150

100

50

0

-50

PPM

S98

164.418  
164.111  
162.267  
161.949  
161.637  
159.812  
146.070  
145.752  
143.499  
143.250  
142.479  
139.238  
139.177  
138.484  
136.384  
135.899  
135.828  
135.680  
135.605  
134.802  
134.719  
134.603  
134.522  
134.026  
134.000  
133.897  
133.866  
133.518  
133.275  
133.199  
132.230  
131.658  
131.624  
131.529  
131.498  
131.388  
131.071  
127.875  
127.816  
127.539  
127.440  
127.010  
126.751  
126.436  
126.025  
115.687  
115.620  
115.477  
115.417  
115.392  
115.267  
115.185  
114.266  
114.056  
77.315  
77.000  
76.677

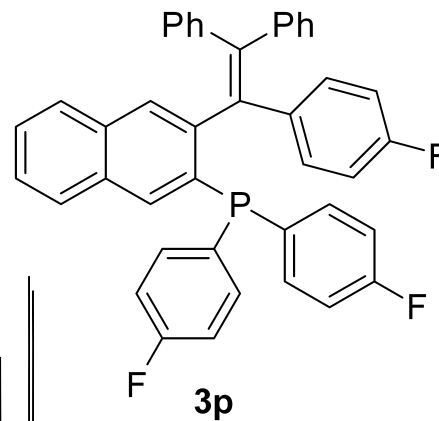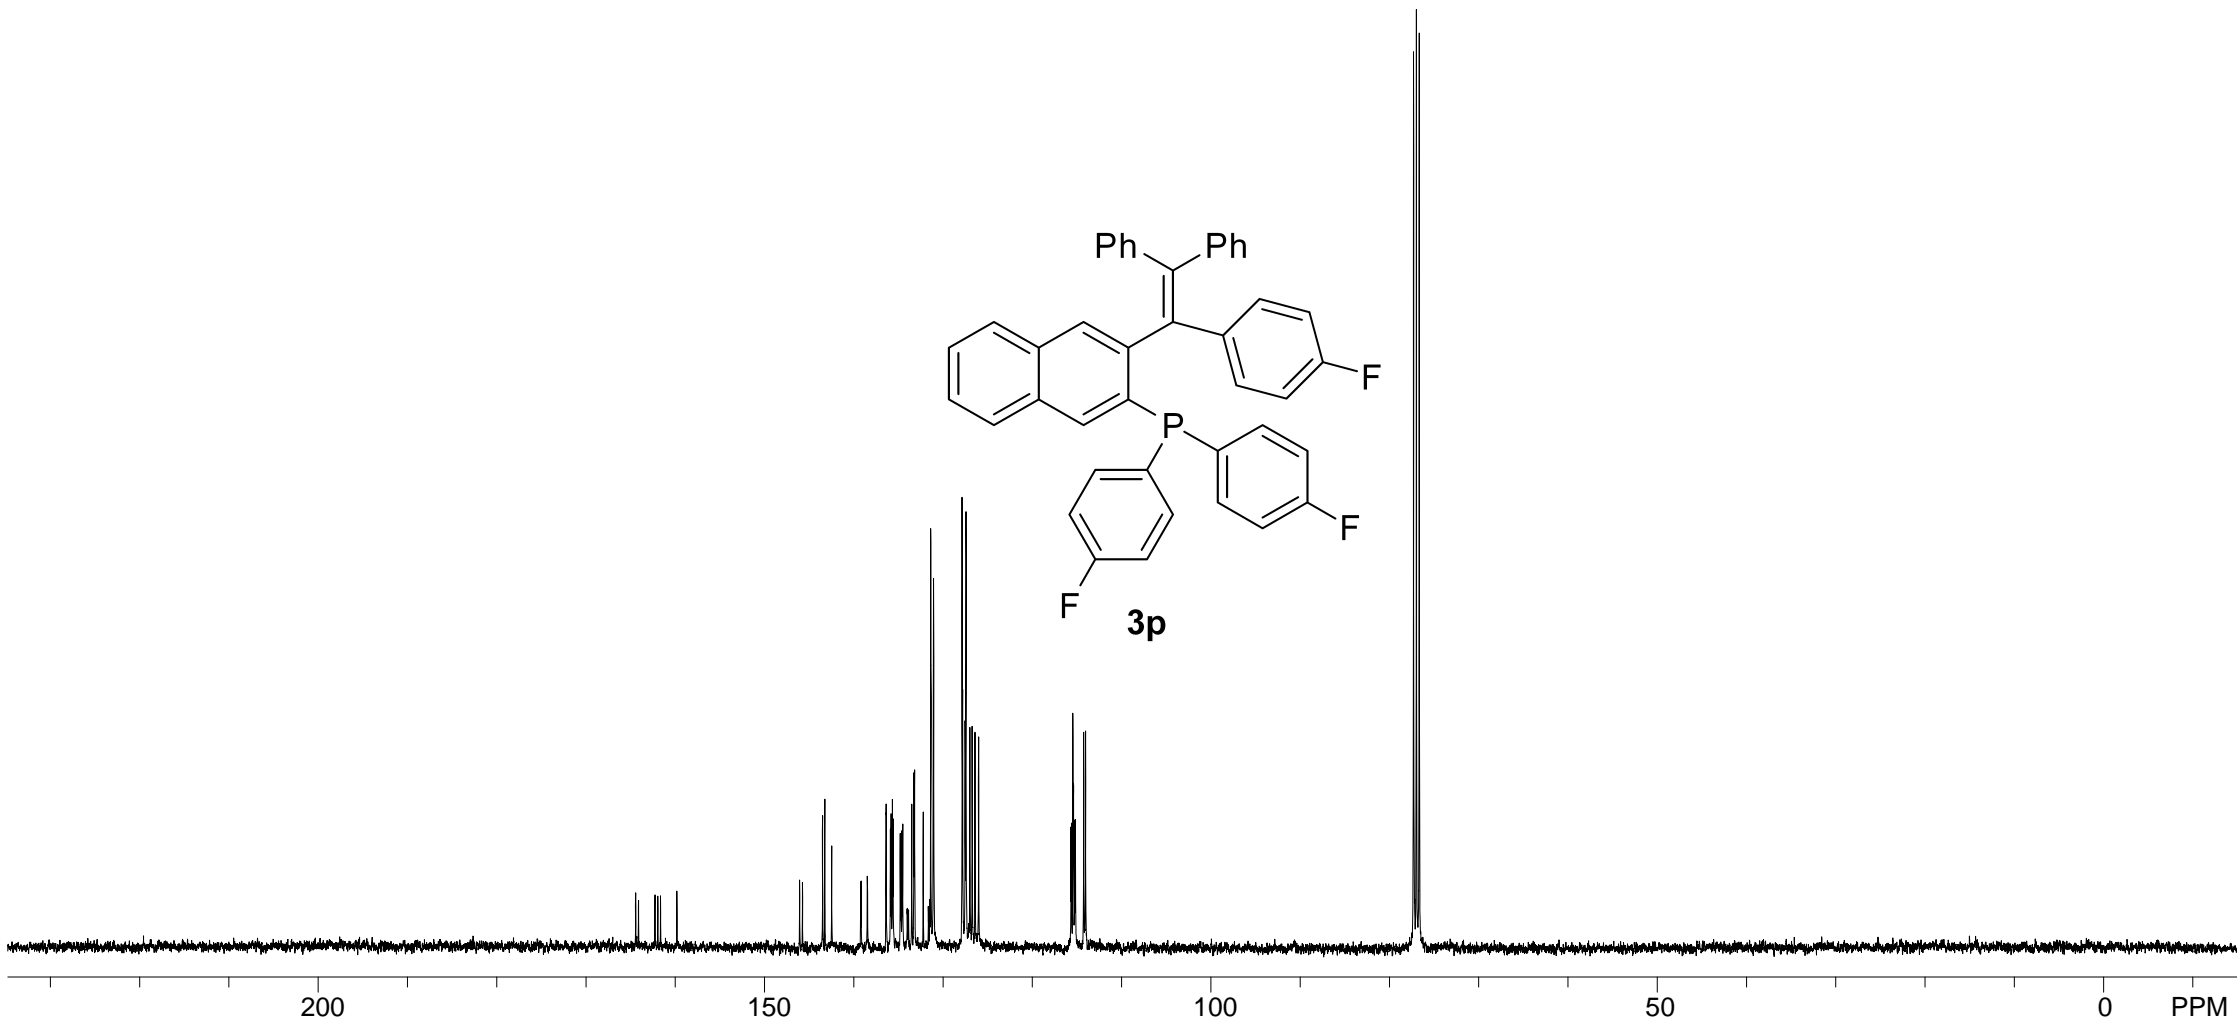

164.418  
164.111  
162.267  
161.949  
161.637  
159.812

146.070  
145.752  
143.499  
143.250  
142.479  
139.238  
139.177  
138.484  
136.384  
135.899  
135.828  
135.680  
135.605  
134.802  
134.719  
134.603  
134.522  
134.026  
134.000  
133.897  
133.866  
133.518  
133.275  
133.199  
132.230  
131.658  
131.624  
131.529  
131.498  
131.388  
131.071  
127.875  
127.816  
127.539  
127.440  
127.010  
126.751  
126.436  
126.025  
115.687  
115.620  
115.477  
115.417  
115.392  
115.267  
115.185  
114.266  
114.056

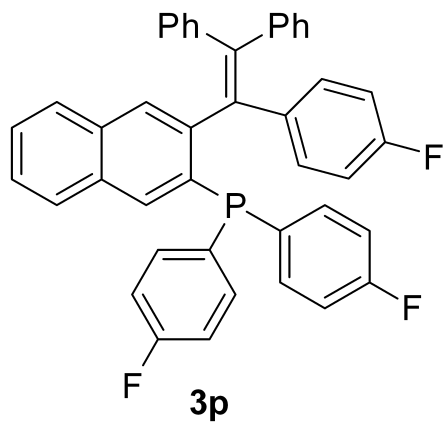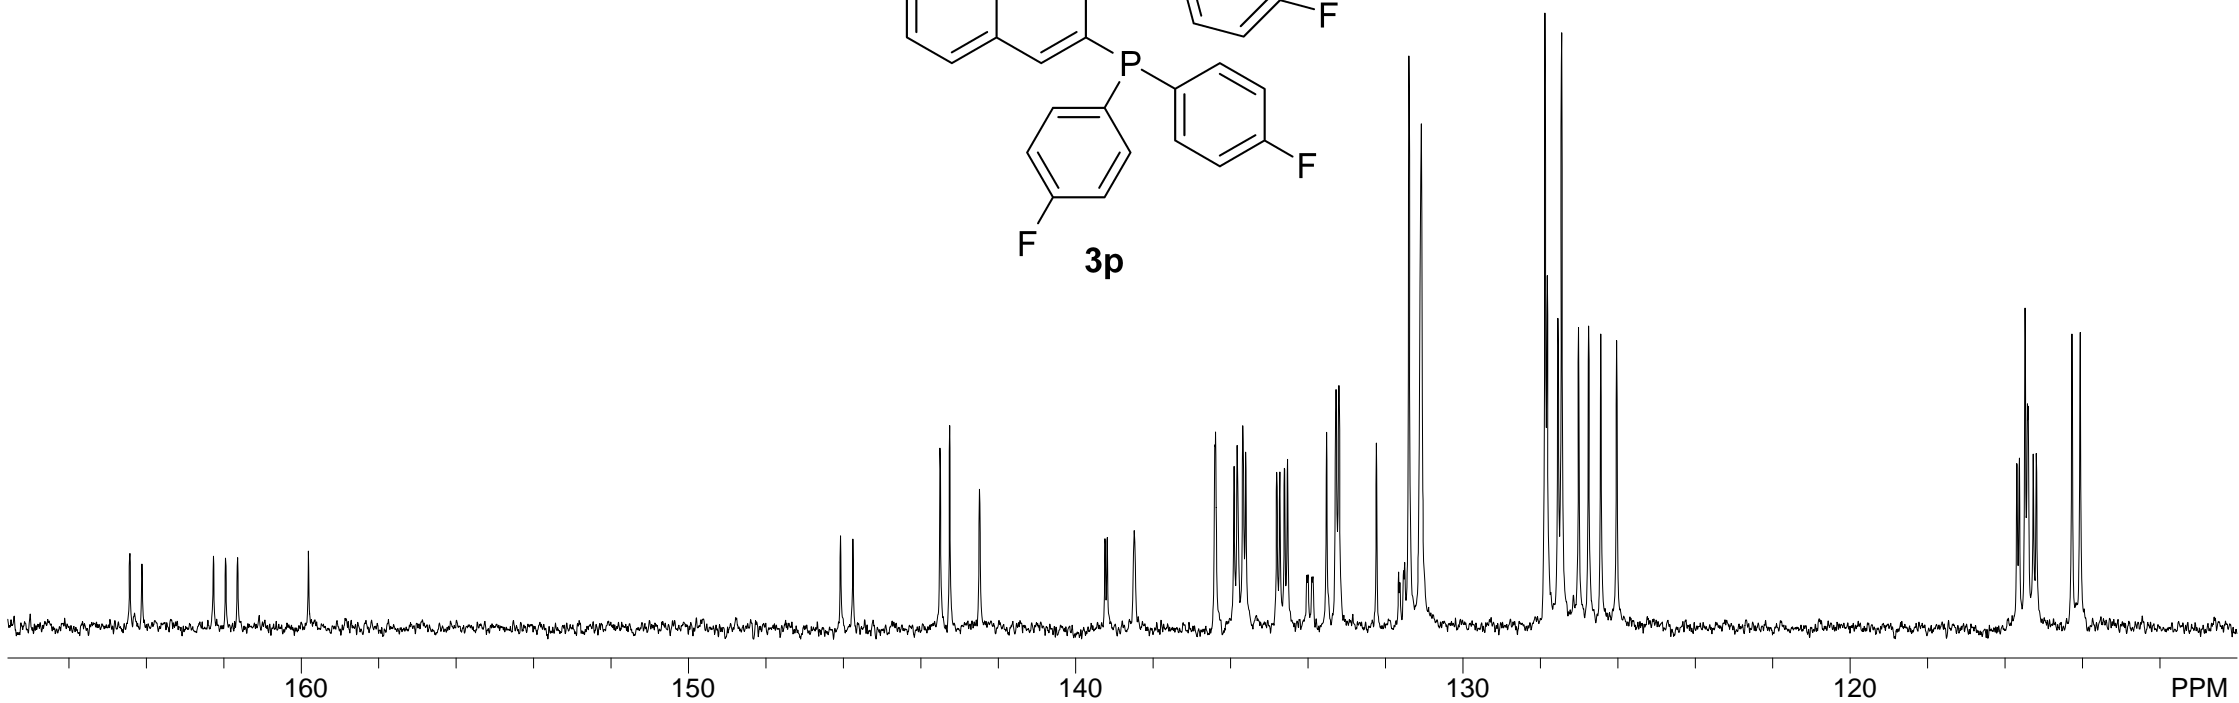

S100

7.660  
7.649  
7.640  
7.605  
7.585  
7.478  
7.467  
7.411  
7.409  
7.388  
7.368  
7.235  
7.215  
7.168  
7.151  
7.135  
6.985  
6.984  
6.975  
6.969  
6.959  
6.952  
6.934  
6.914  
6.877  
6.861  
6.856  
6.840  
6.700

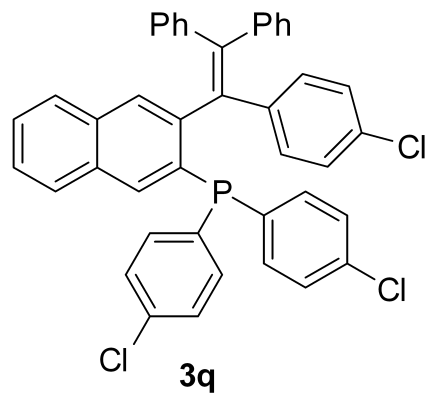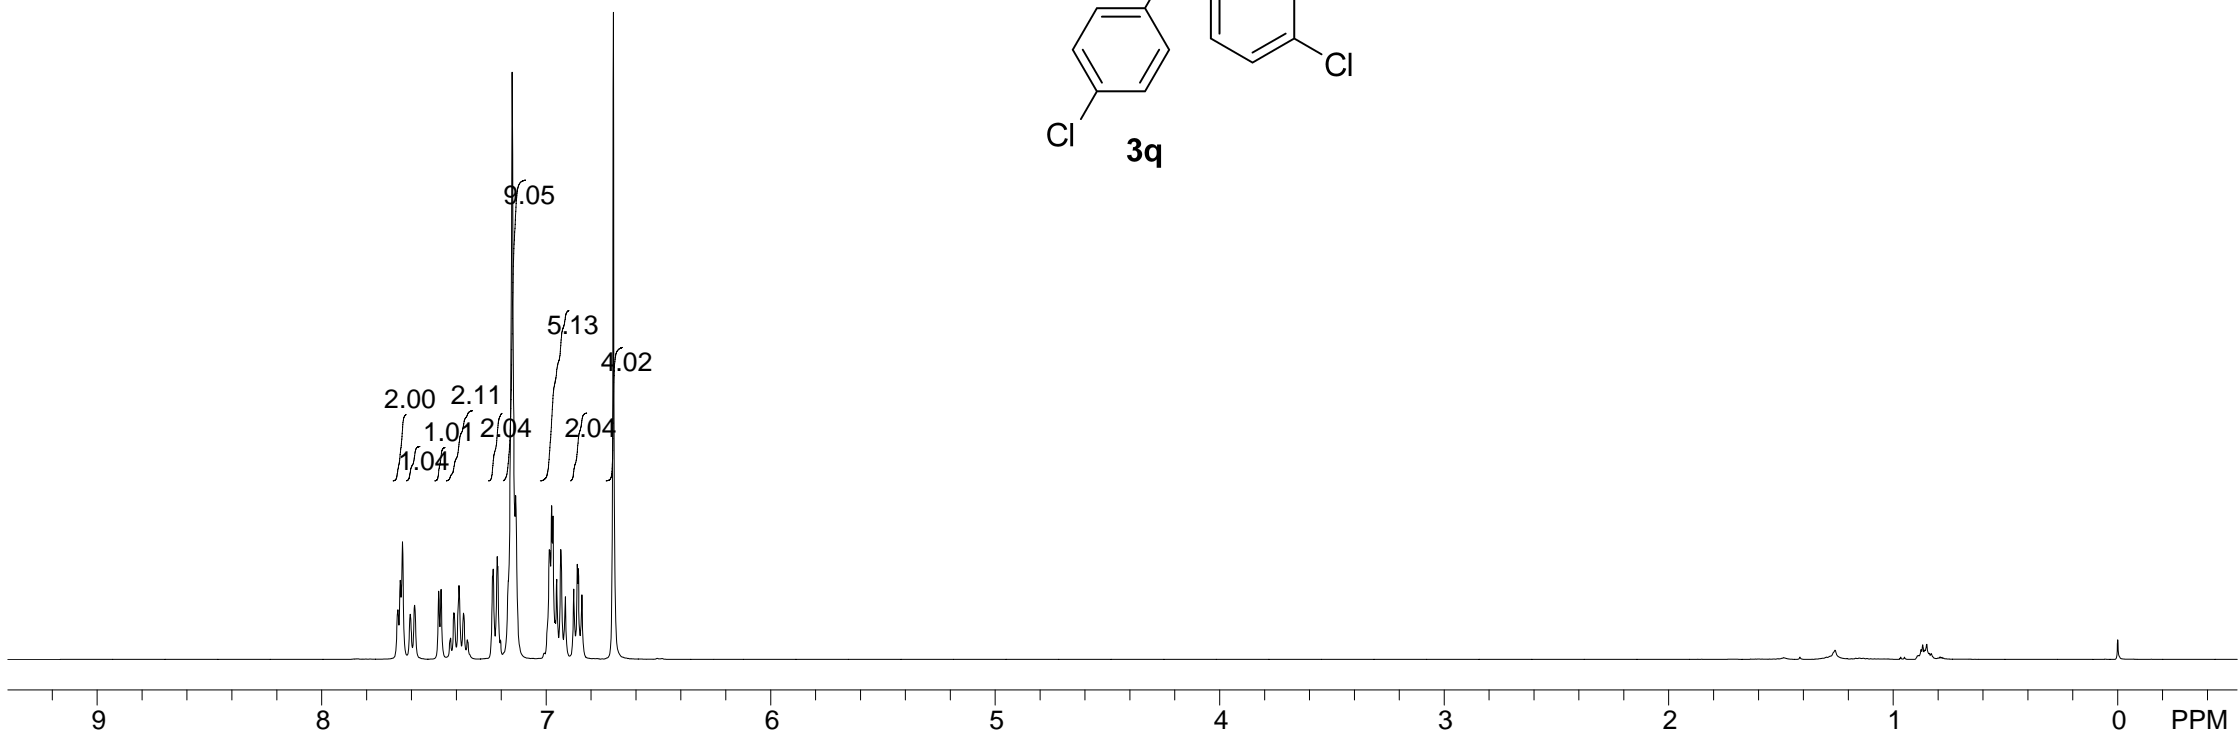

15.480

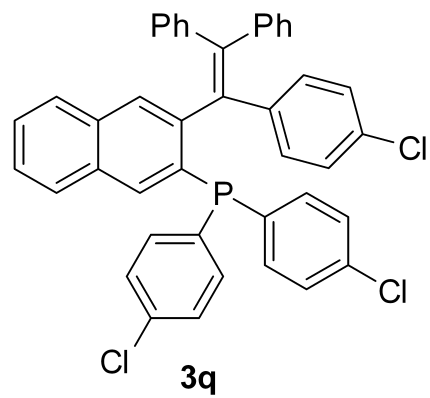

200

150

100

50

0

-50

PPM

S102

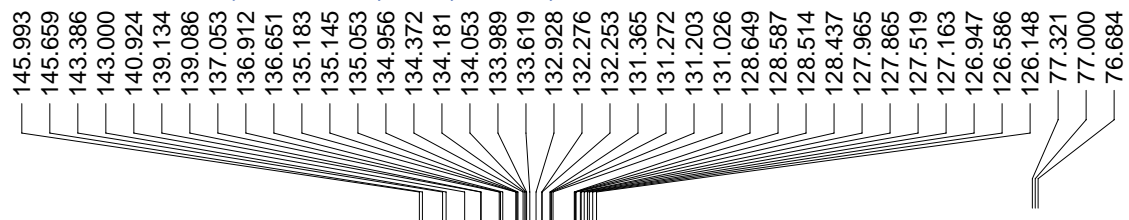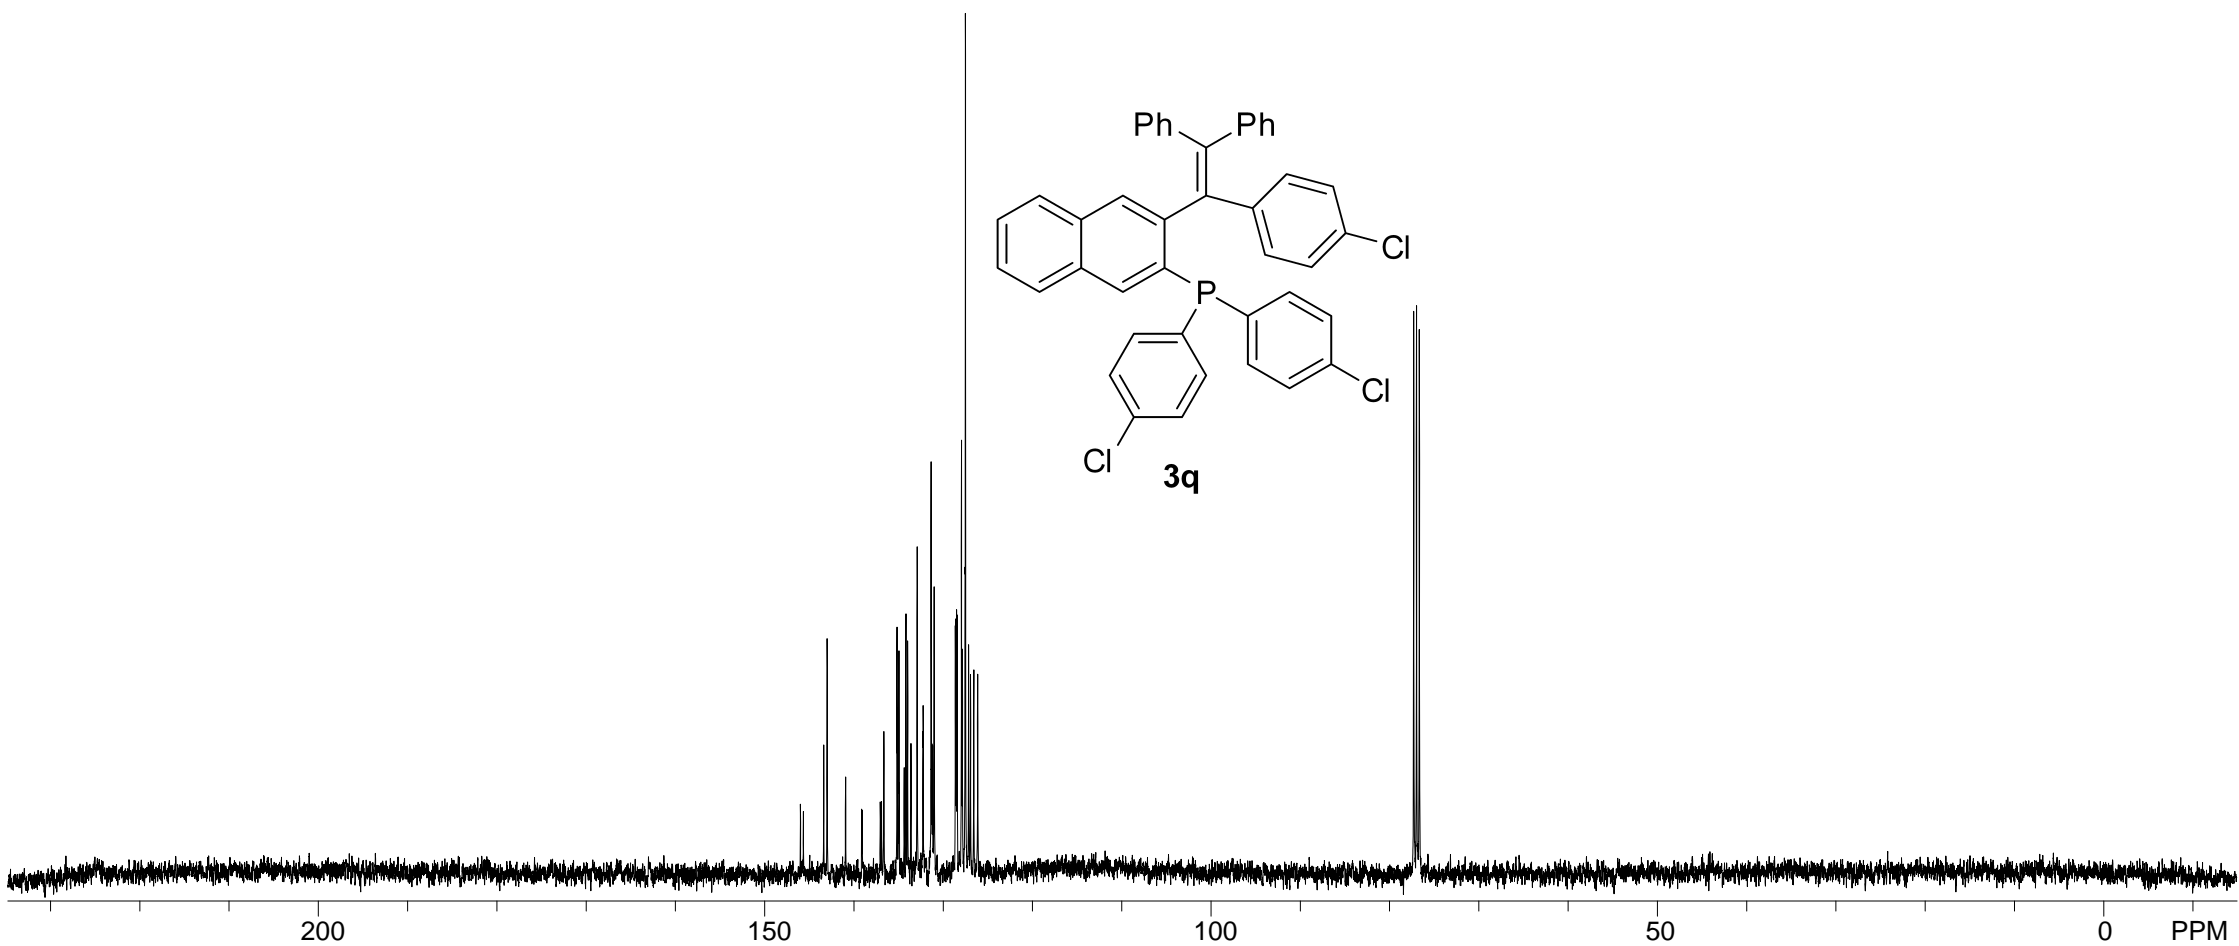

145.993  
145.659

143.386  
143.000

140.924

139.134  
139.086

137.053  
136.912  
136.651

135.183  
135.145  
135.053

134.956  
134.372  
134.181

134.053  
133.989  
133.619

132.928  
132.276  
132.253

131.365  
131.272  
131.203

131.026

128.649  
128.587  
128.514

128.437  
127.965  
127.865

127.519  
127.163  
126.947

126.586  
126.148

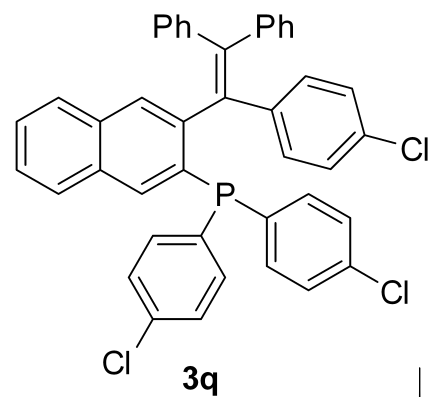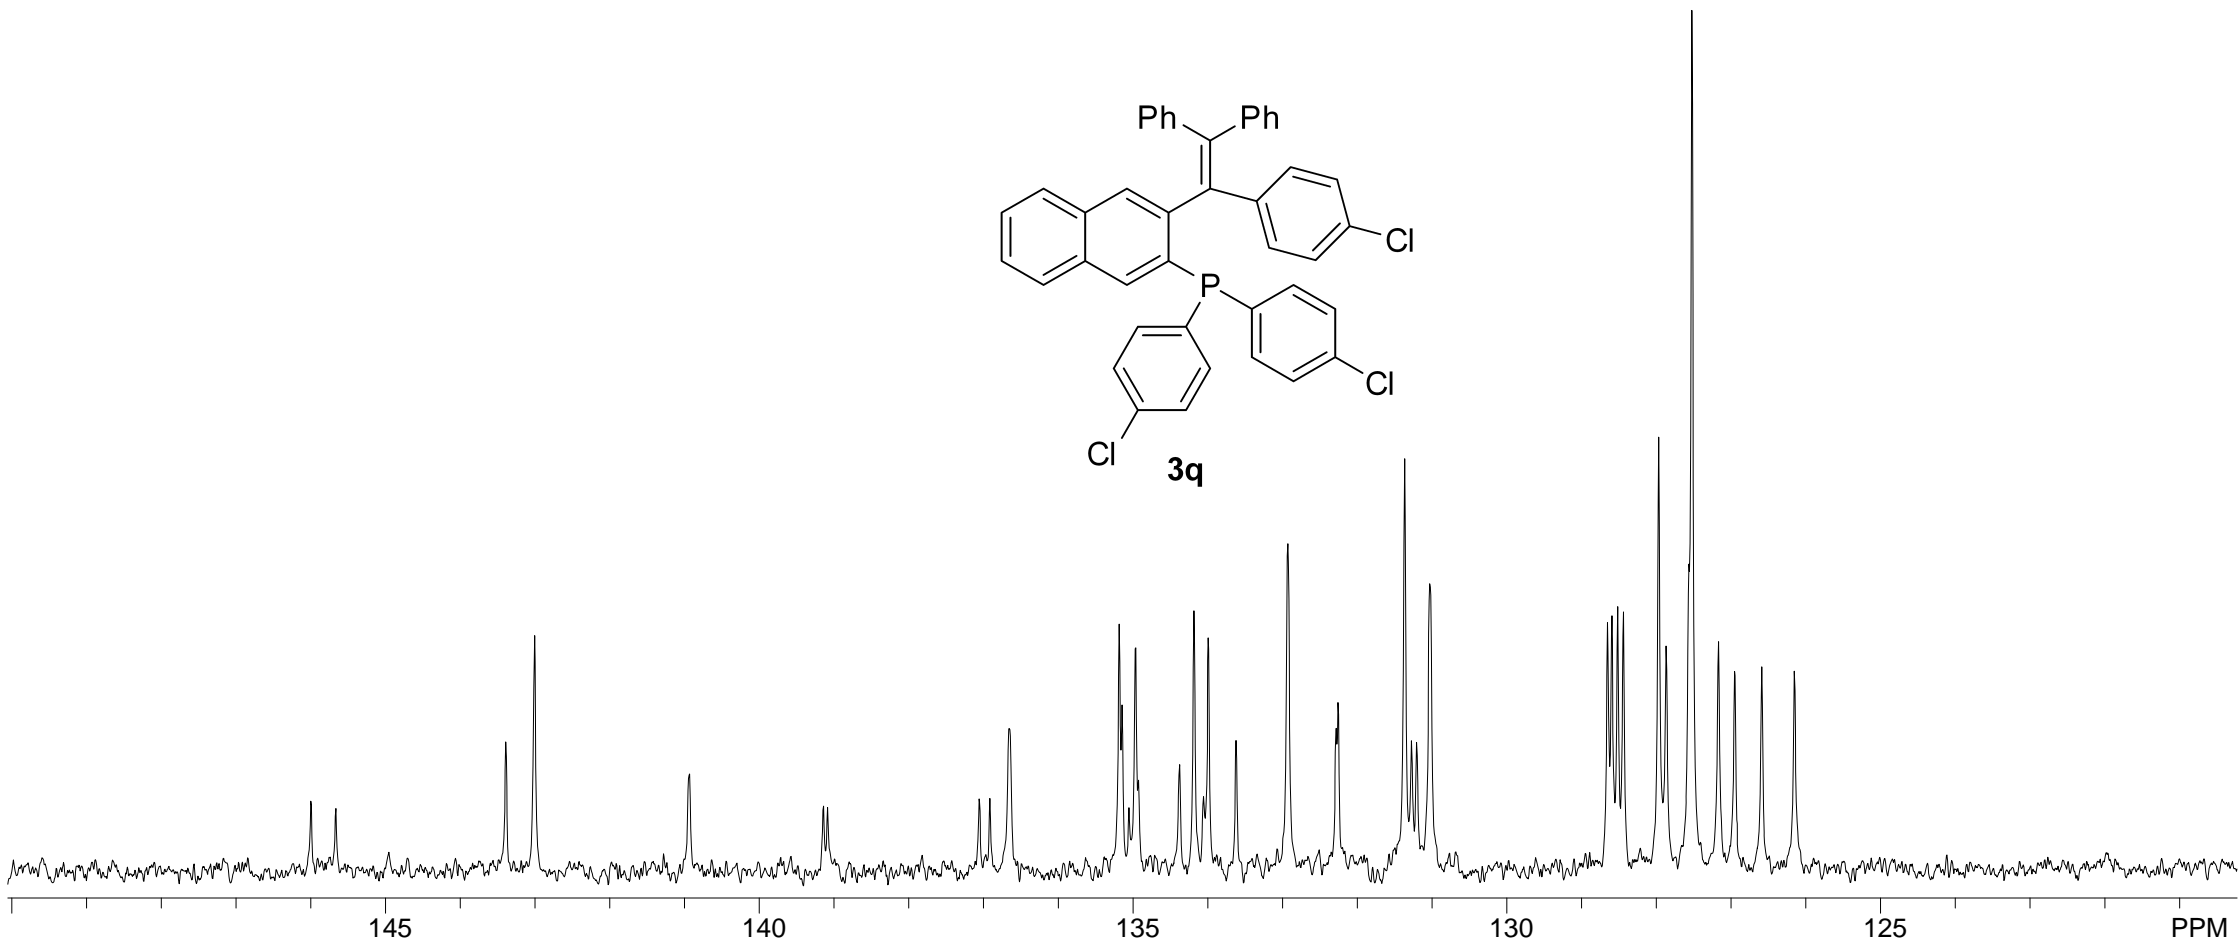



7.663  
7.644  
7.633  
7.613  
7.594  
7.475  
7.465  
7.418  
7.393  
7.371  
7.314  
7.294  
7.219  
7.156  
6.989  
6.980  
6.873  
6.860  
6.856  
6.841  
6.810  
6.792  
6.773  
6.646  
6.625

0.000

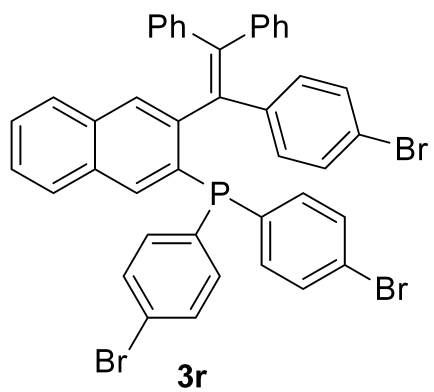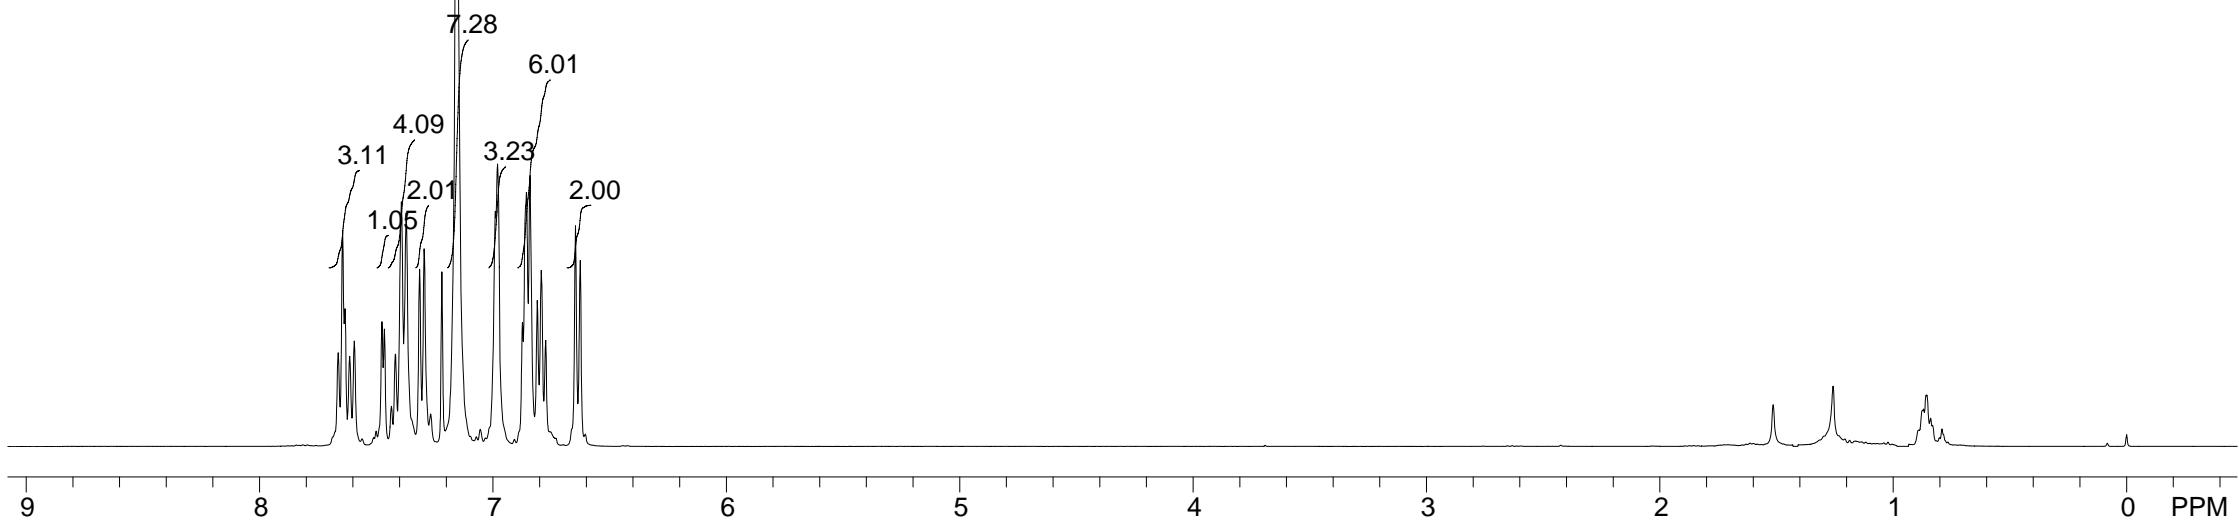

15.508

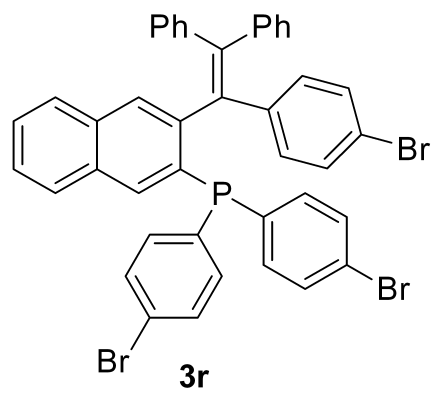

S106

200

150

100

50

0

-50

PPM

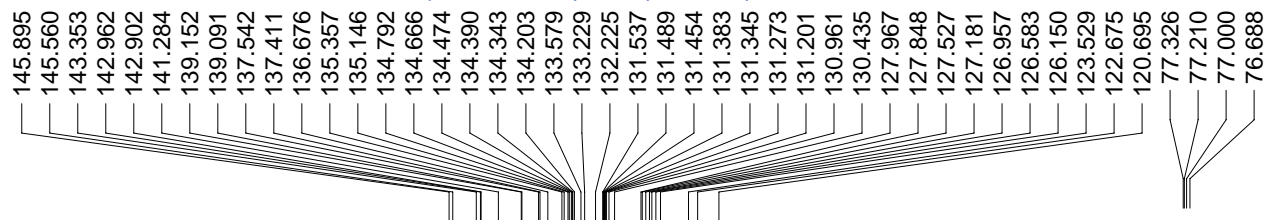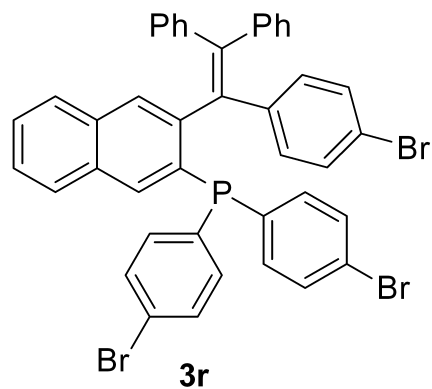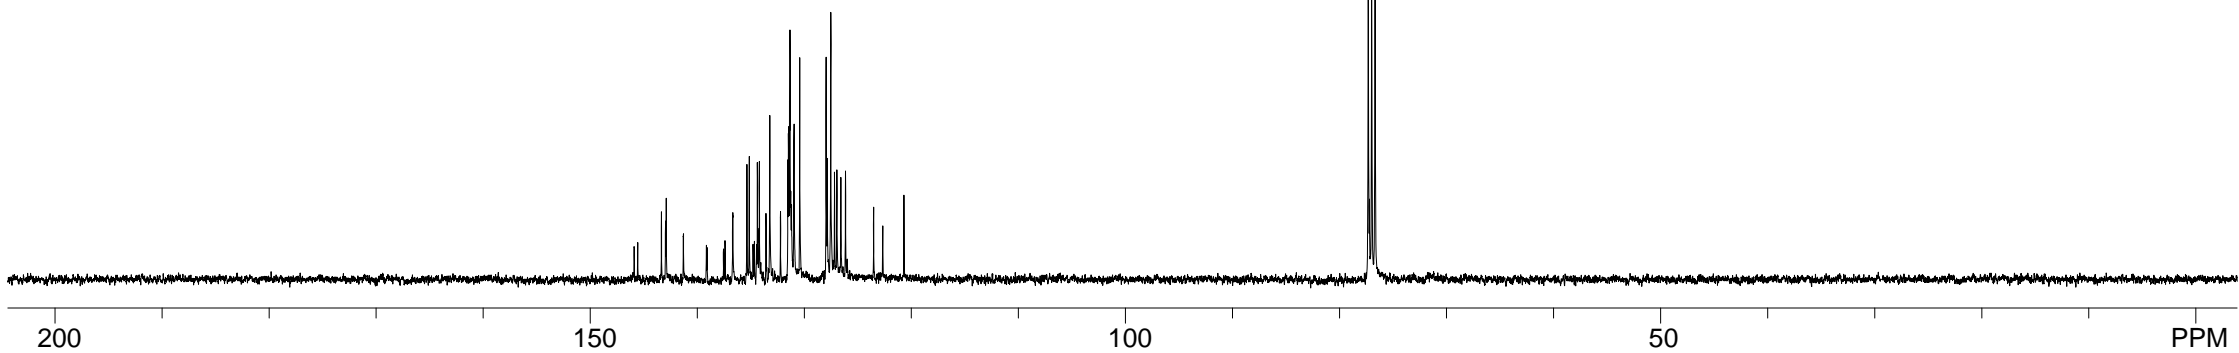

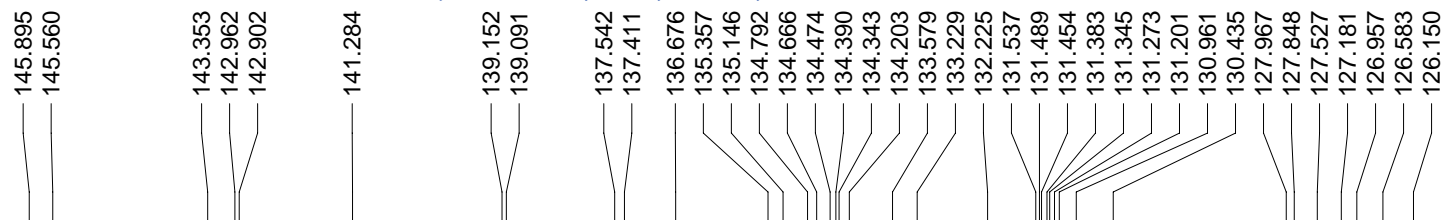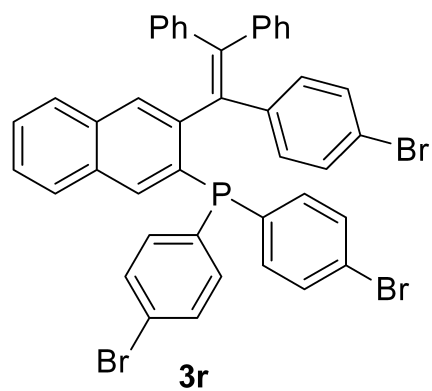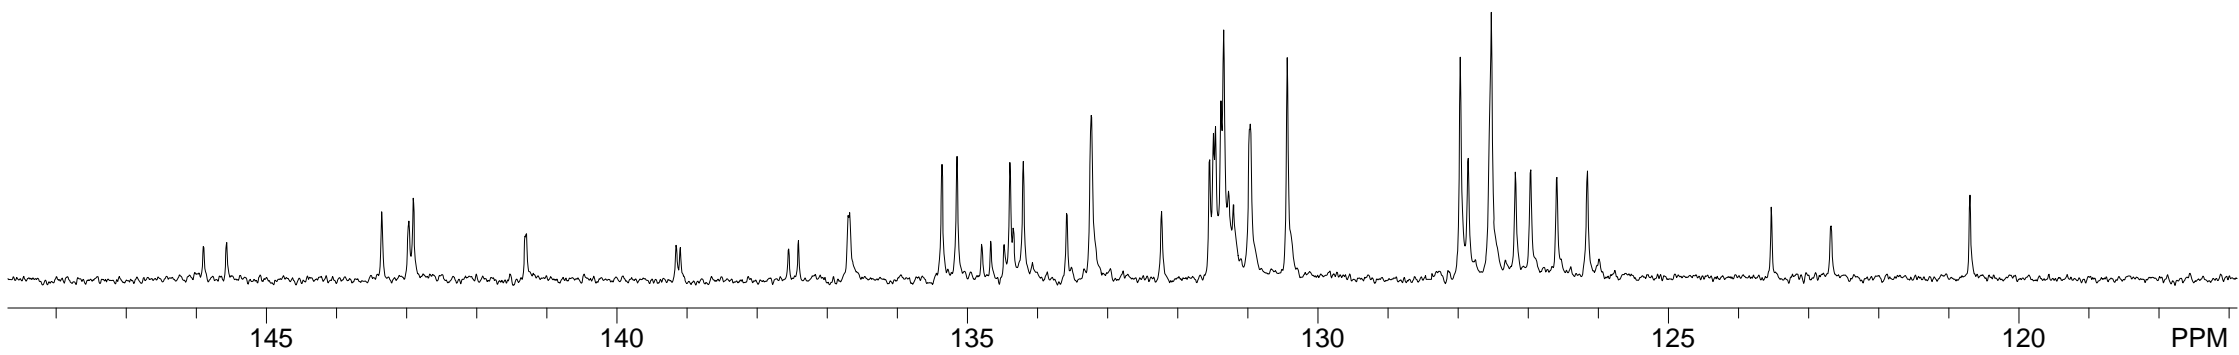

7.773  
7.754  
7.743  
7.710  
7.689  
7.668  
7.648  
7.535  
7.516  
7.405  
7.385  
7.370  
7.350  
7.329  
7.311  
7.296  
7.267  
7.251  
7.233  
7.223  
7.217  
7.194  
7.145  
7.124  
7.106  
7.099  
7.026  
7.013  
6.994  
6.971  
6.919  
6.902

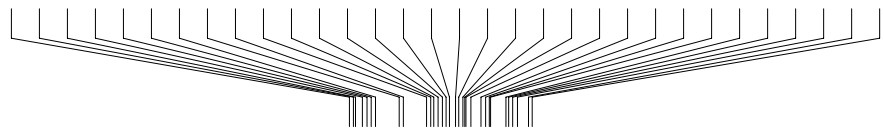

0.000

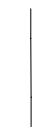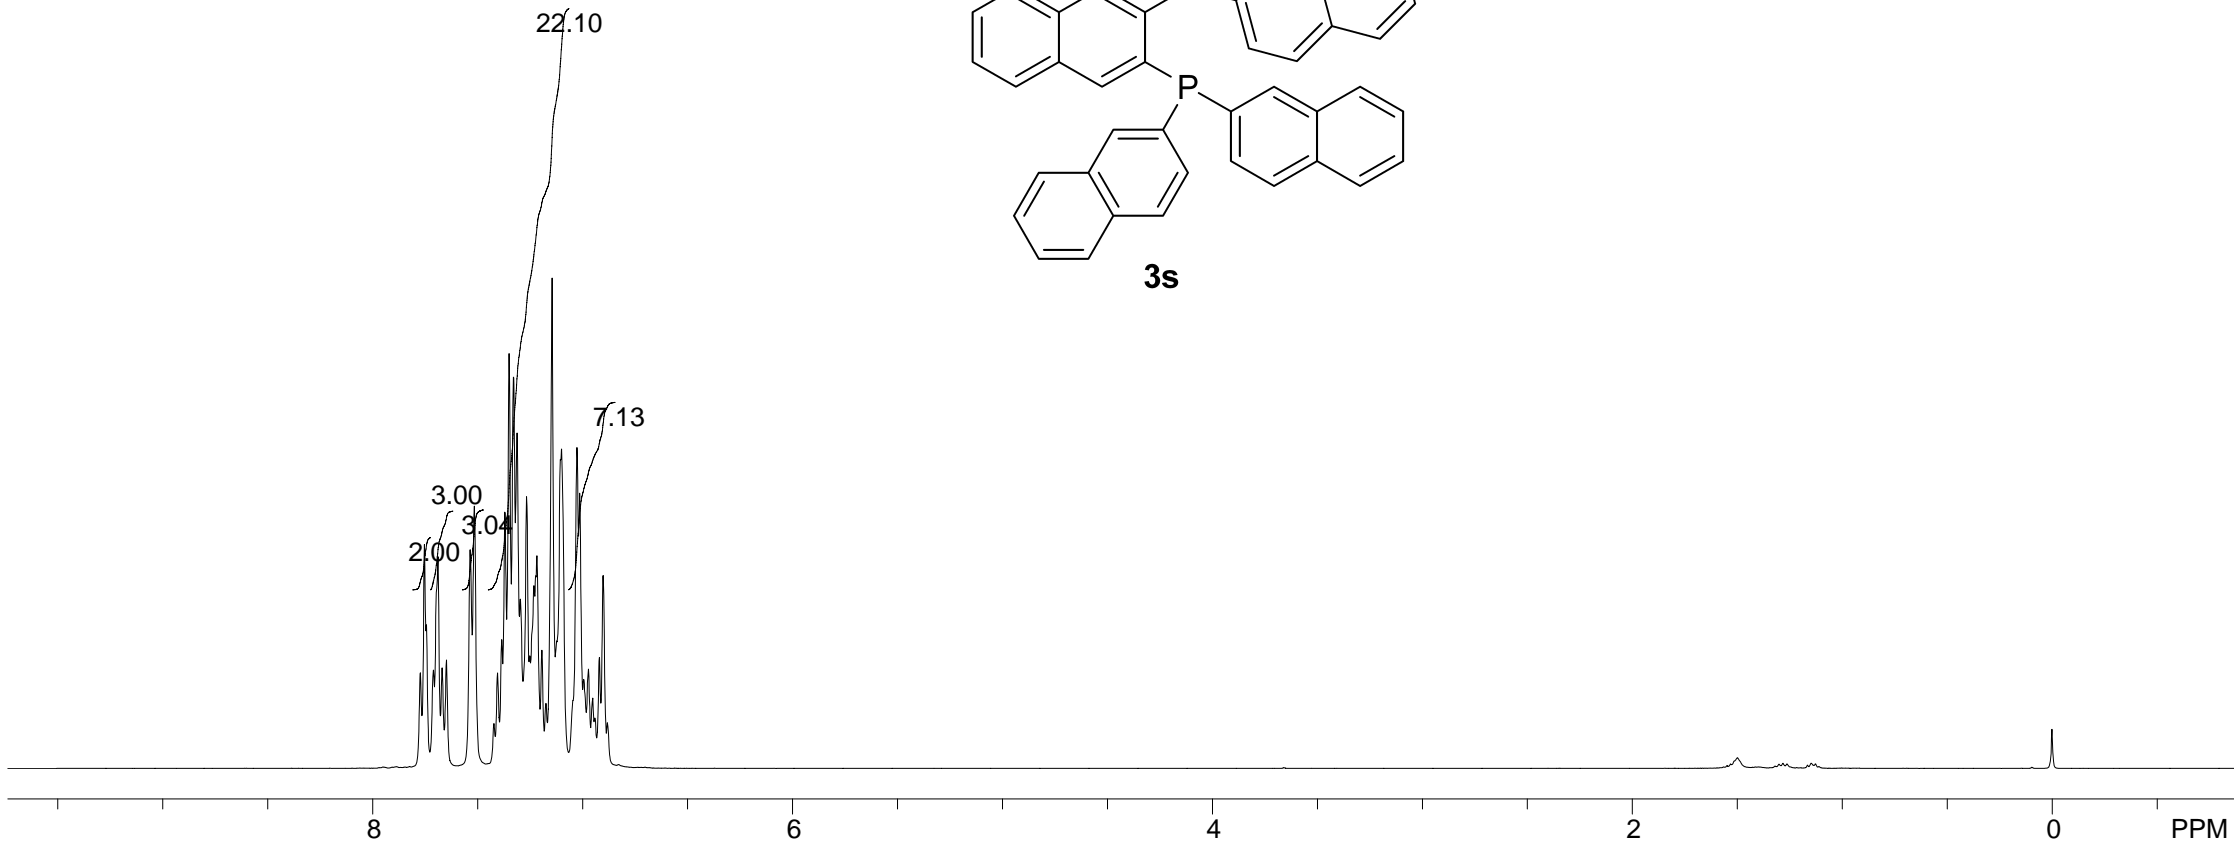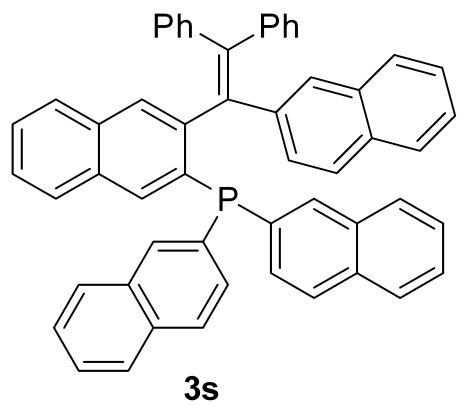

12.087

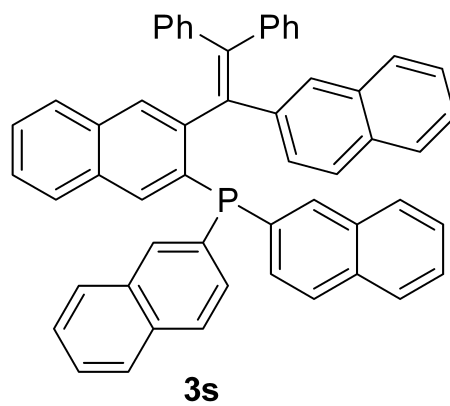

200

150

100

50

0

-50

PPM

S110

147.114  
146.786  
144.028  
143.374  
142.511  
140.772  
140.723  
140.221  
137.045  
136.914  
136.787  
136.022  
135.900  
134.827  
134.551  
133.613  
133.279  
133.239  
132.961  
132.858  
132.653  
132.569  
132.521  
132.334  
131.687  
131.534  
131.313  
131.224  
131.178  
129.992  
129.799  
129.585  
129.454  
127.981  
127.944  
127.872  
127.815  
127.607  
127.530  
127.429  
127.230  
127.166  
126.780  
126.758  
126.673  
126.444  
126.384  
126.215  
126.129  
126.055  
125.757  
125.658  
125.479  
124.983  
77.318  
77.000  
76.675

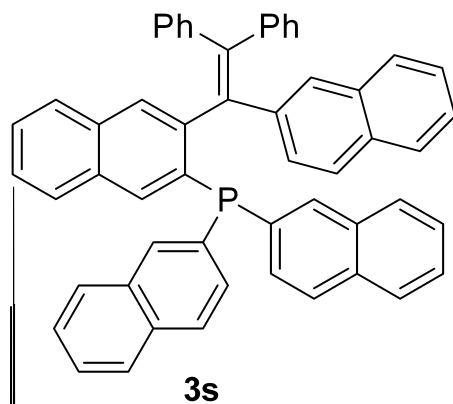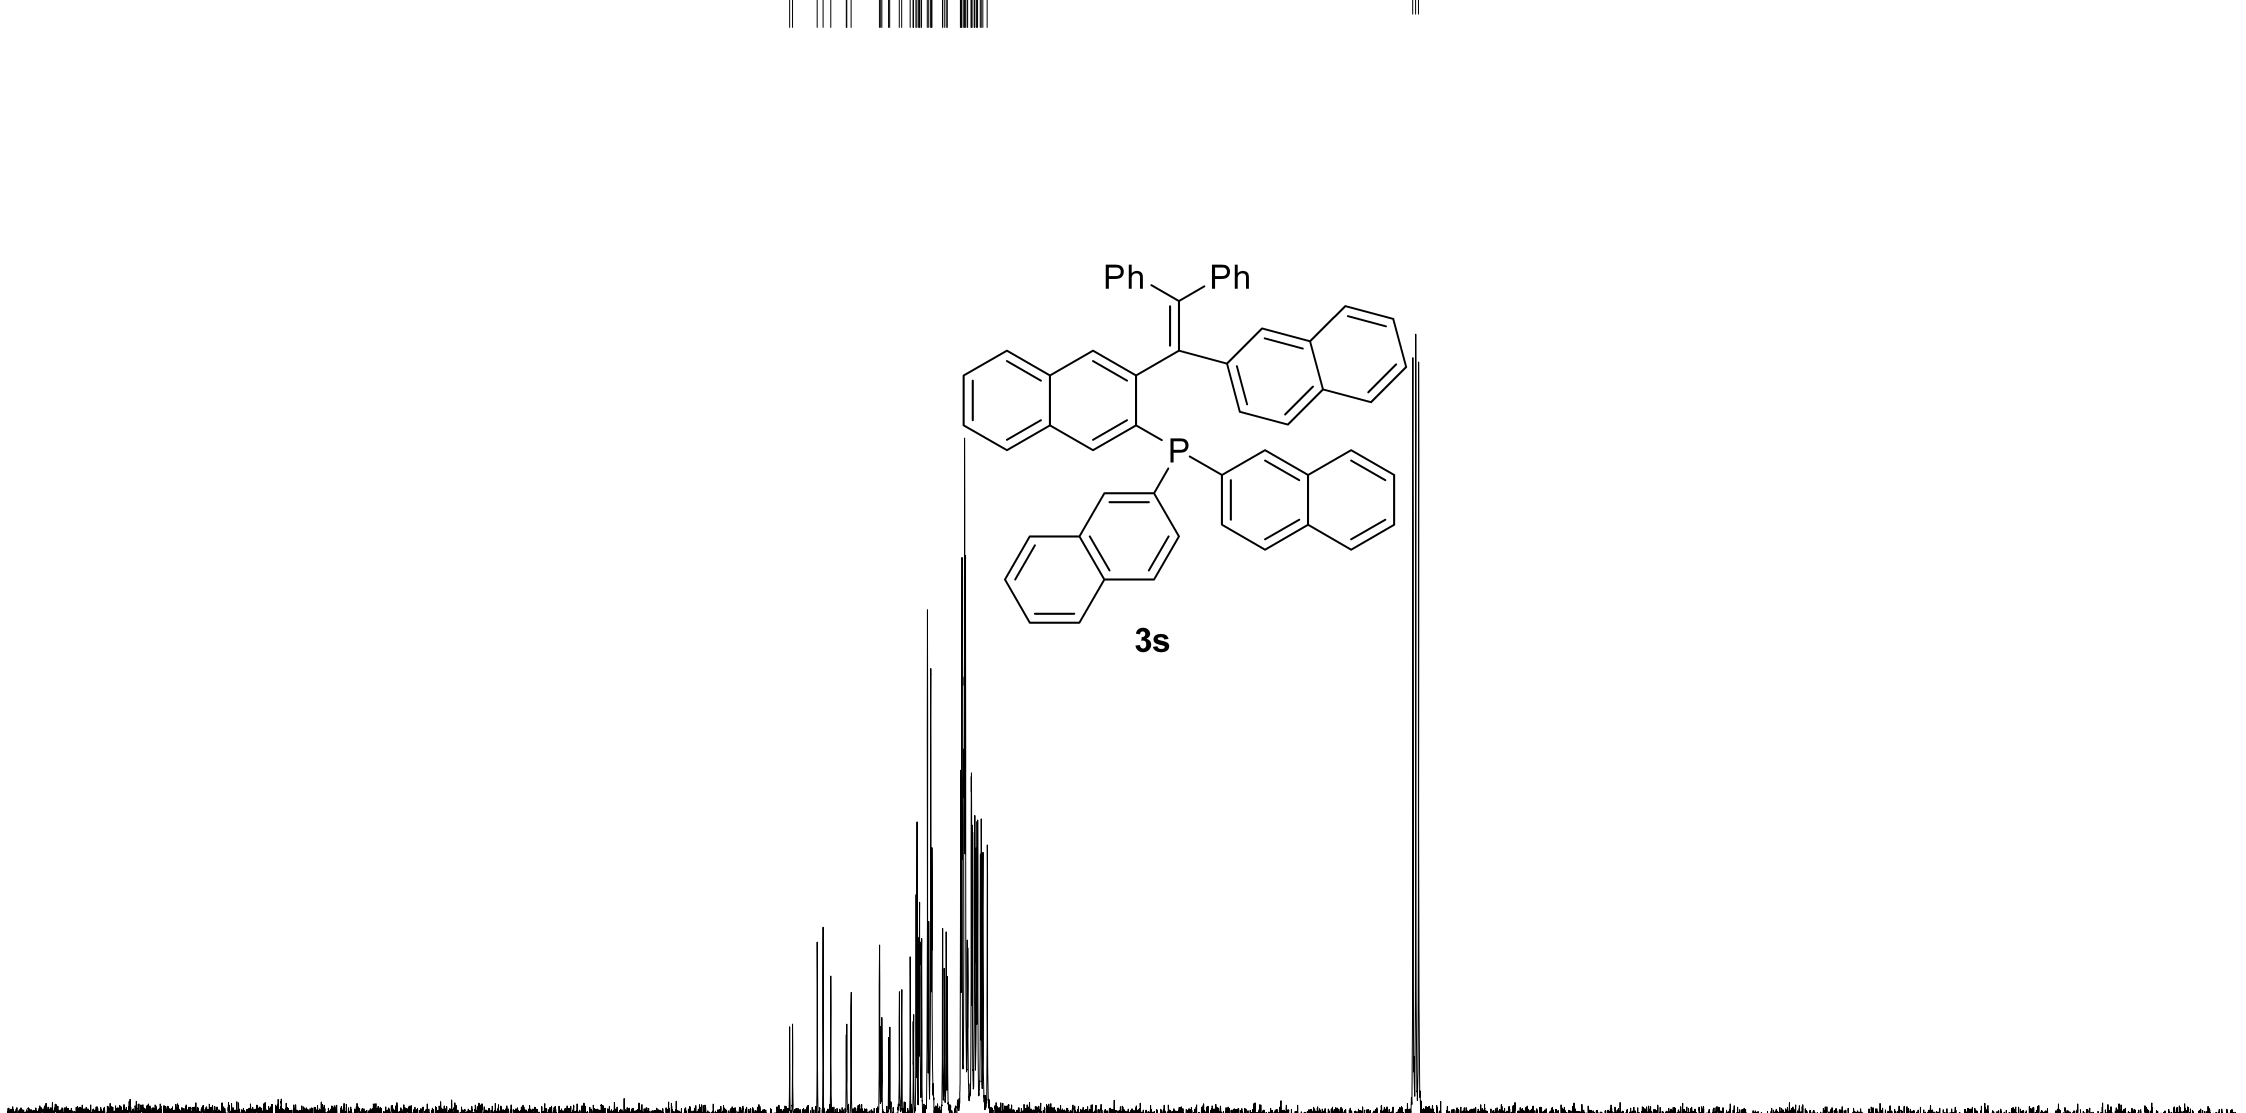

200

150

100

50

0

PPM

S111

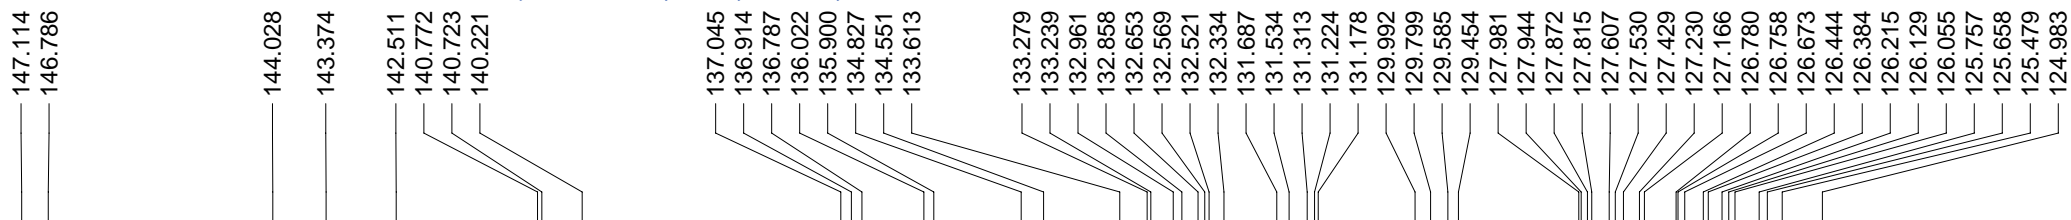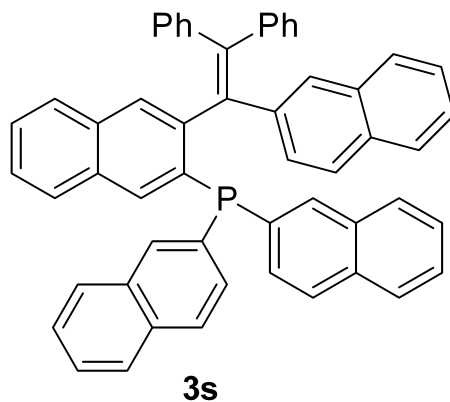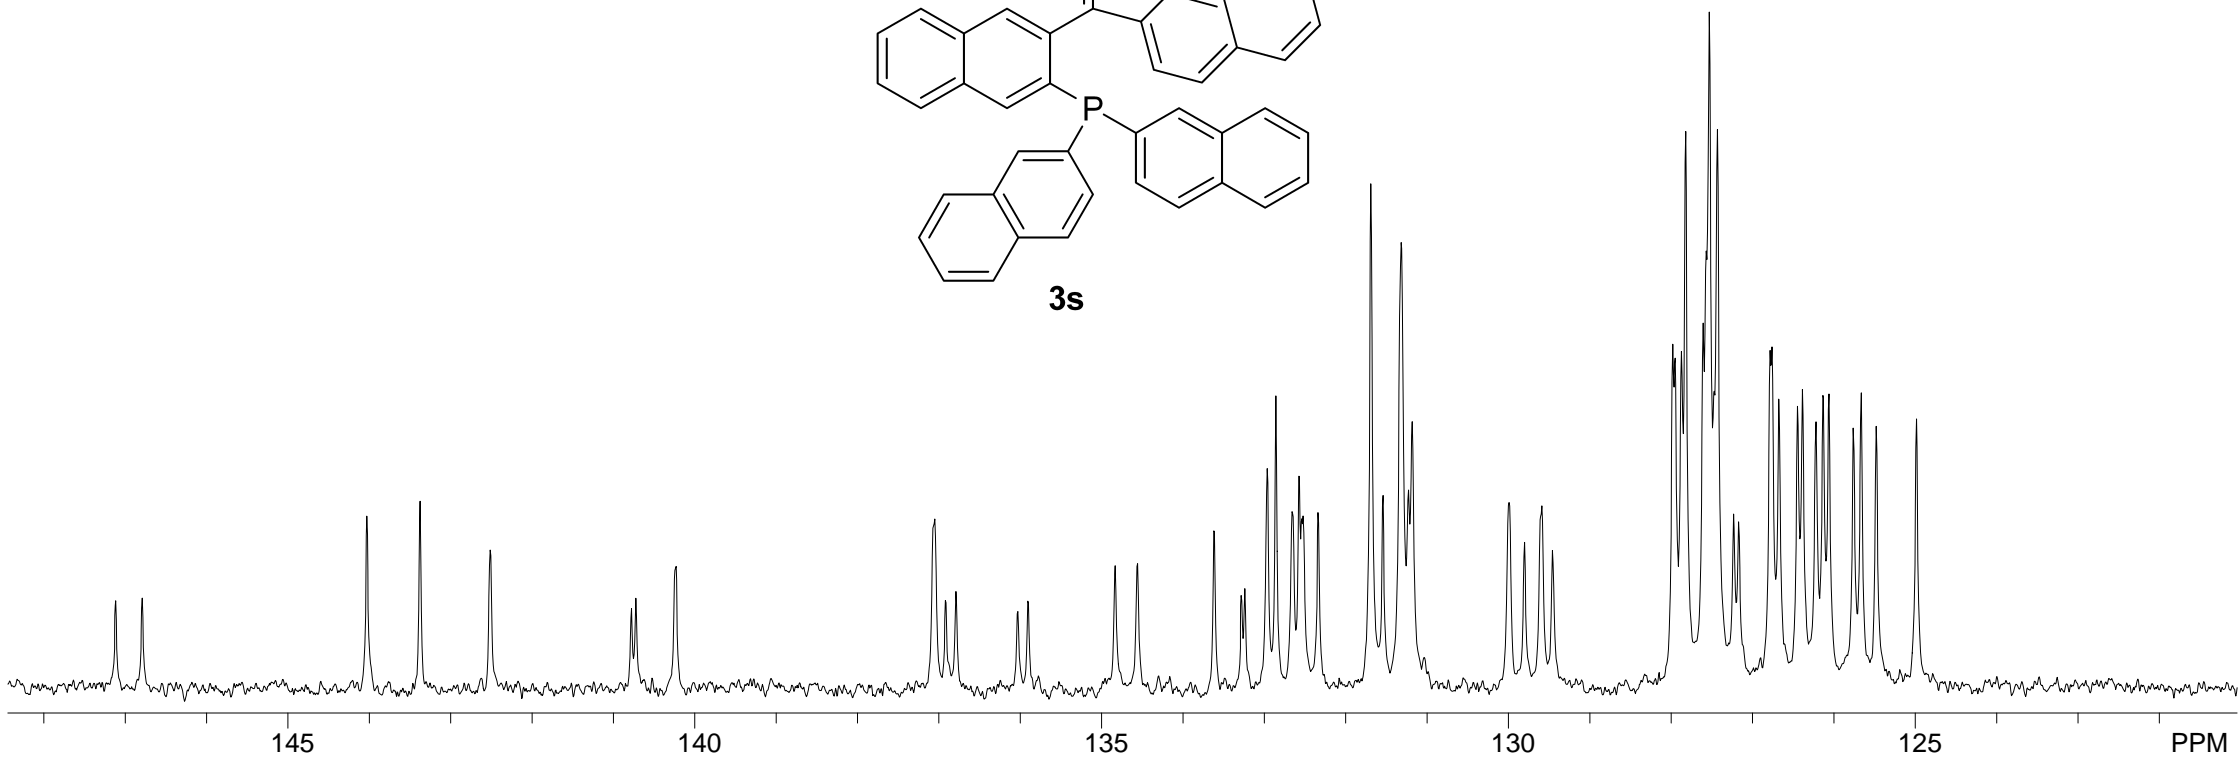



7.981  
7.977  
7.970  
7.719  
7.709  
7.705  
7.699  
7.660  
7.655  
7.647  
7.636  
7.623  
7.615  
7.610  
7.600  
7.569  
7.376  
7.369  
7.361  
7.354  
7.332  
7.328  
7.310  
7.305  
7.288  
7.276  
7.260  
7.200  
7.024  
7.024  
6.948  
6.940  
6.935  
6.883  
6.870  
6.584  
6.519  
6.383  
6.379  
6.301  
6.298  
6.095  
6.091  
6.087  
5.489  
5.483

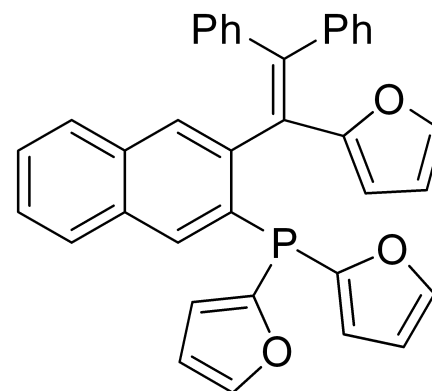

**3t**

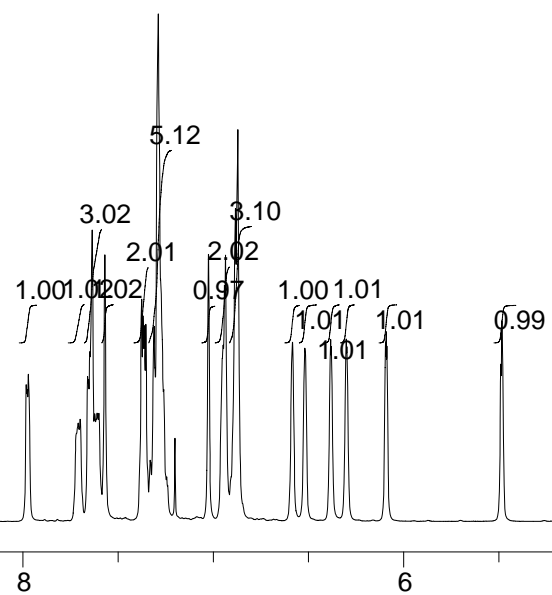

-0.000

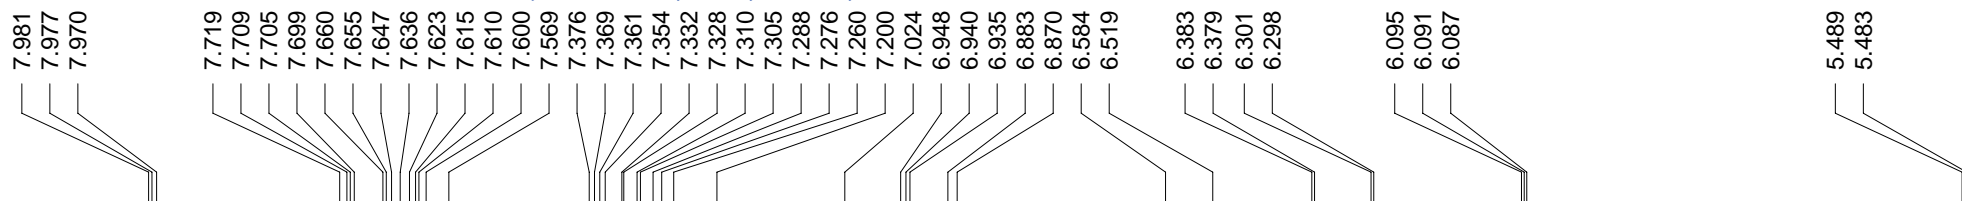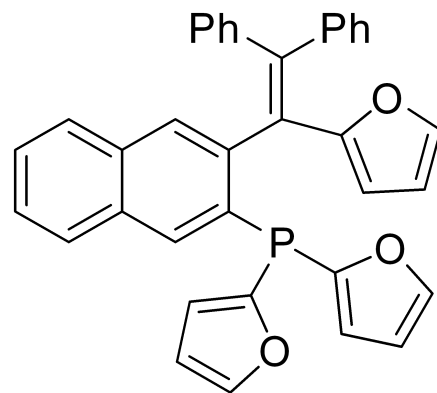

**3t**

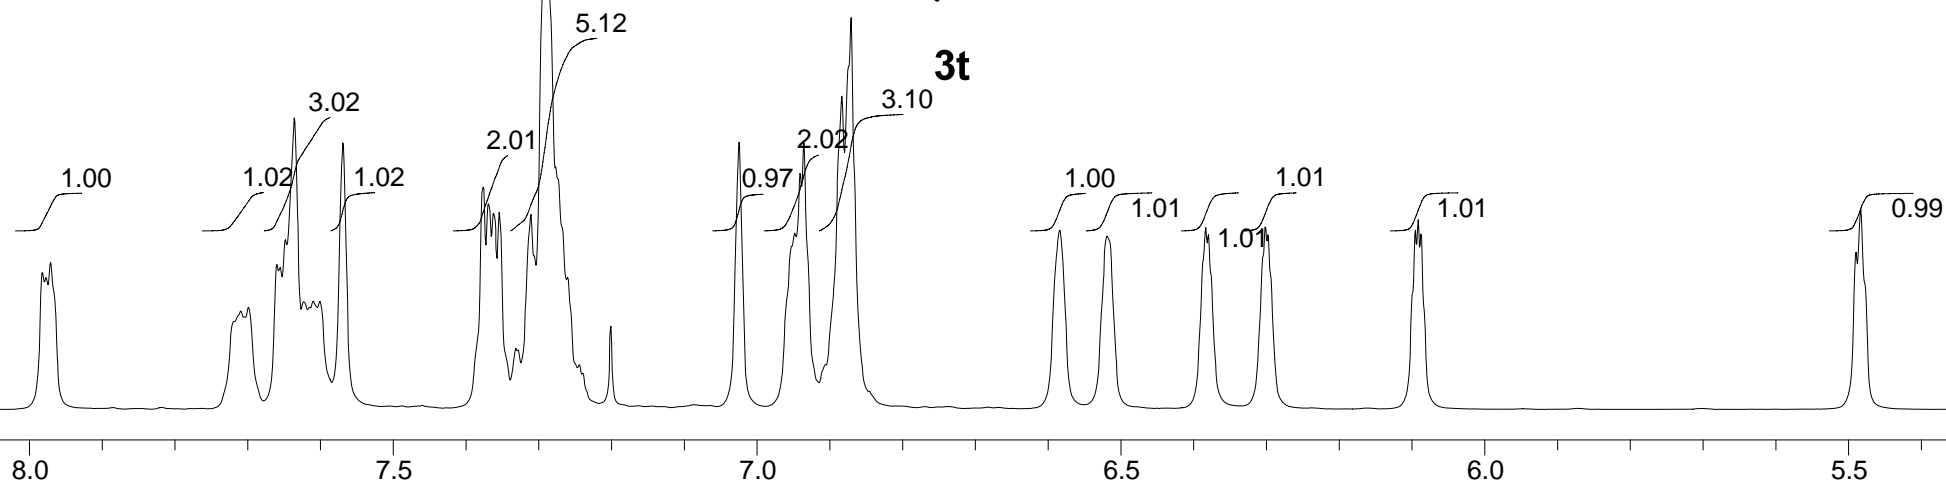

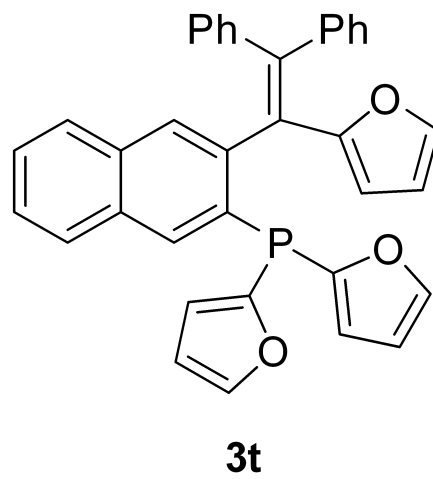

200

150

100

50

0

-50

PPM

S115

154.799  
151.290  
151.177  
150.581  
150.458  
147.229  
147.059  
143.689  
142.303  
141.841  
141.526  
141.217  
135.154  
133.417  
133.213  
133.179  
132.389  
131.004  
130.943  
130.721  
130.110  
129.387  
129.321  
128.151  
128.027  
127.532  
127.295  
126.932  
126.689  
126.323  
125.957  
121.296  
121.144  
121.034  
120.905  
112.390  
111.011  
110.793  
110.739  
110.594  
110.532  
77.321  
77.000  
76.684

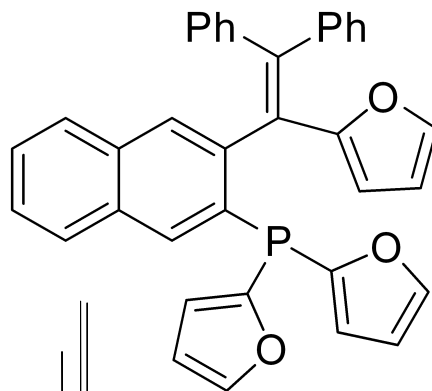

**3t**

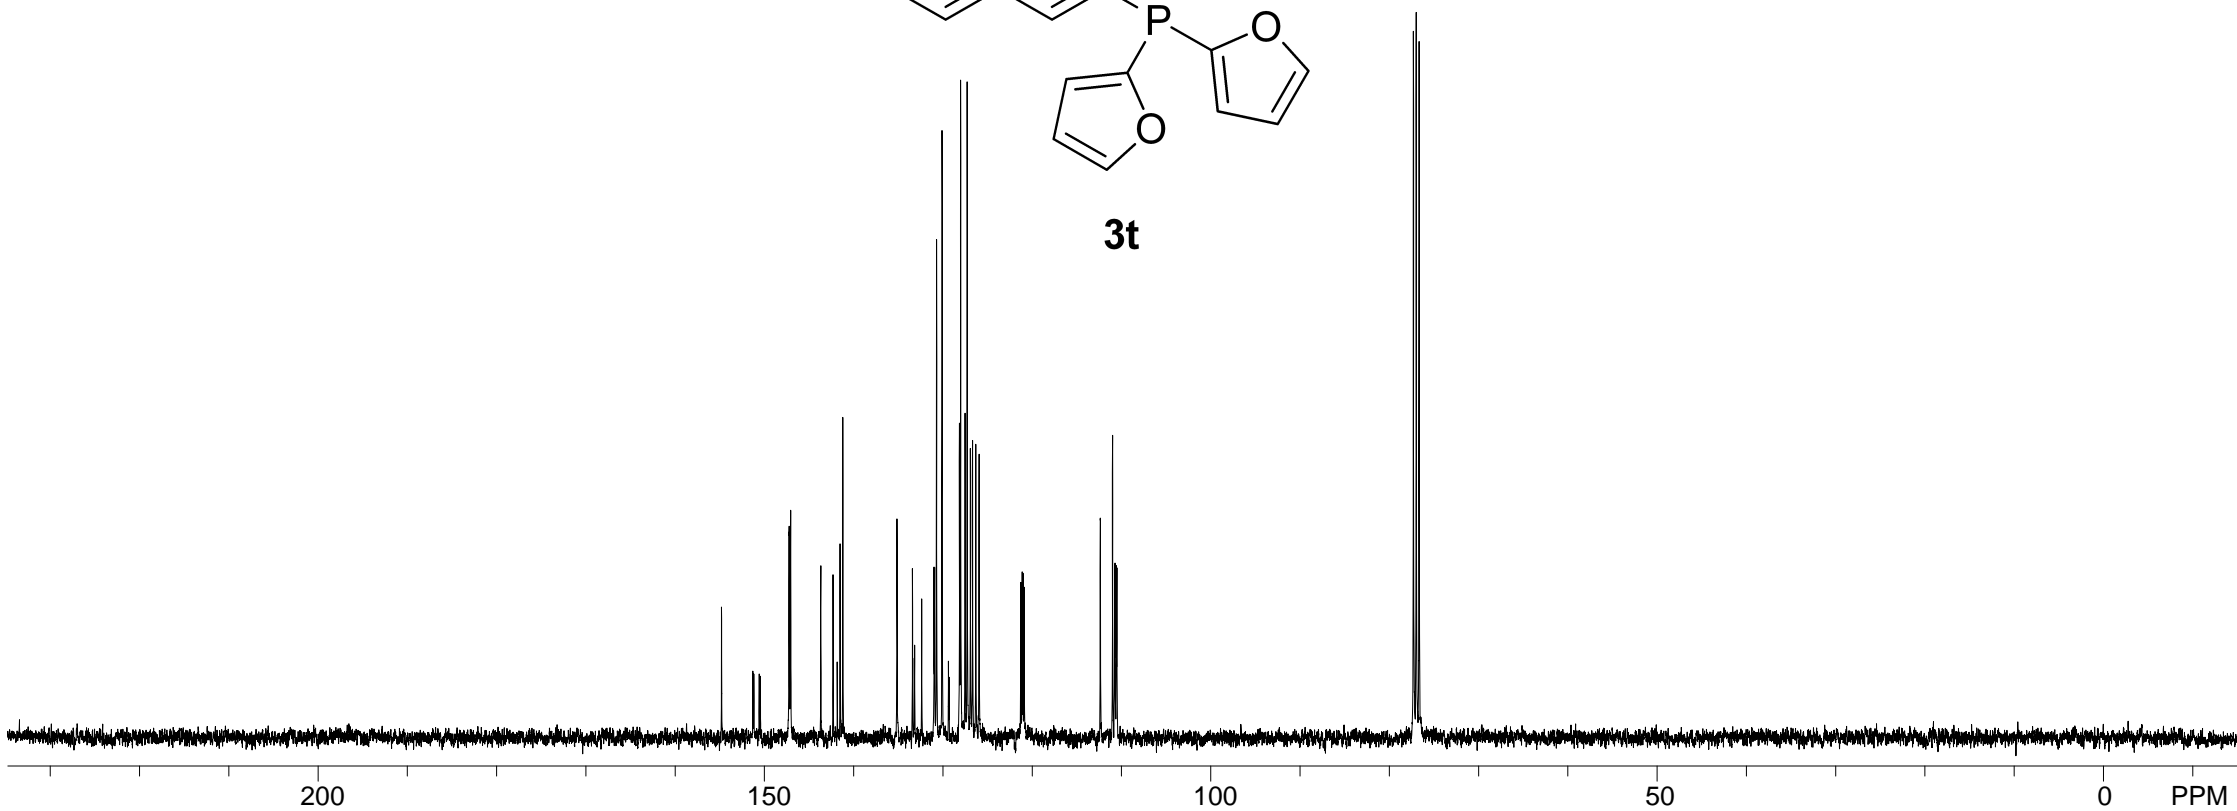

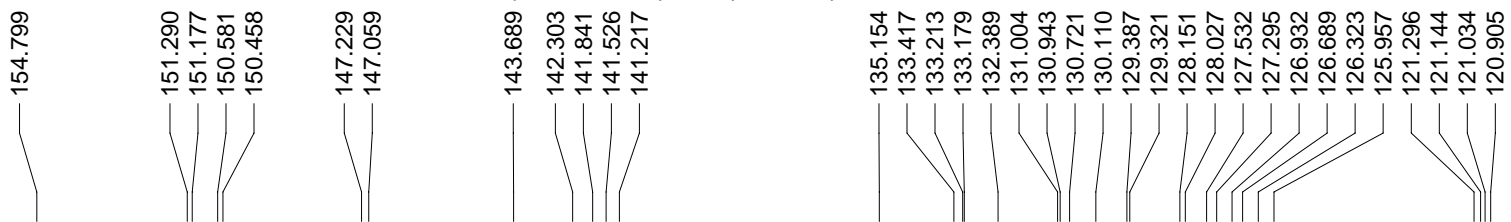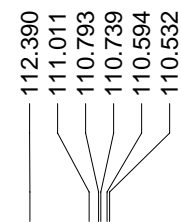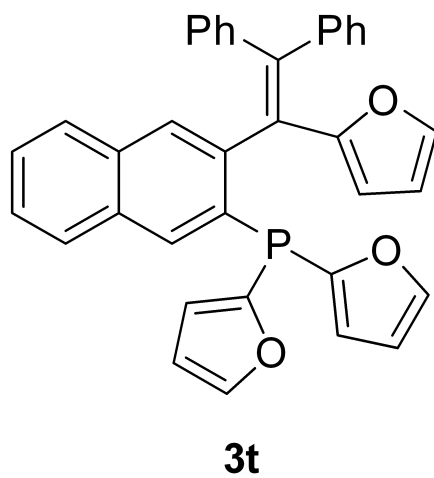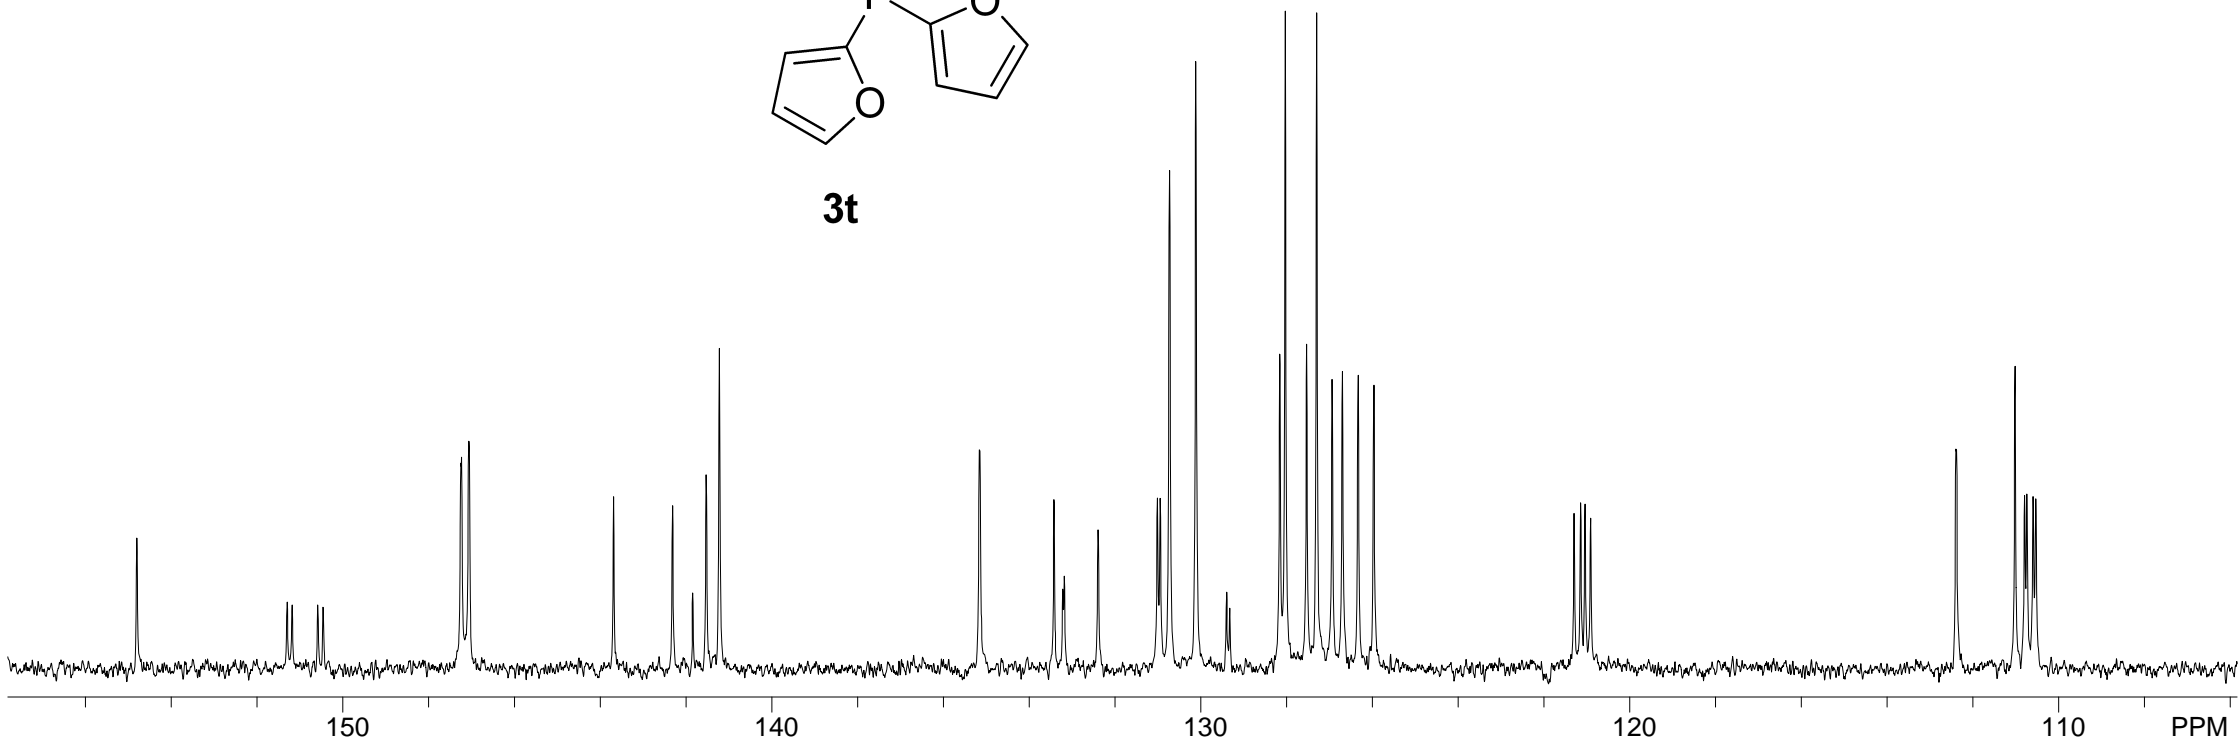

7.872  
7.777  
7.775  
7.757  
7.664  
7.648  
7.642  
7.594  
7.587  
7.407  
7.398  
7.389  
7.250  
7.164  
7.148  
7.008  
6.983  
6.977  
6.961  
6.943  
6.924

1.619  
1.594  
1.549  
1.481  
1.450  
1.435  
1.420  
1.402  
1.384  
1.372  
1.341  
1.256  
1.052  
1.036  
1.017  
1.003  
0.975  
0.958  
0.937  
0.920  
0.903  
0.881  
0.863  
0.856  
0.730  
0.697  
0.681  
0.662  
0.000

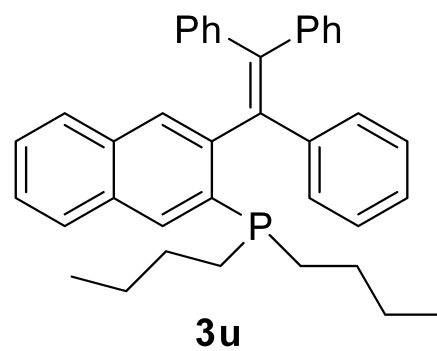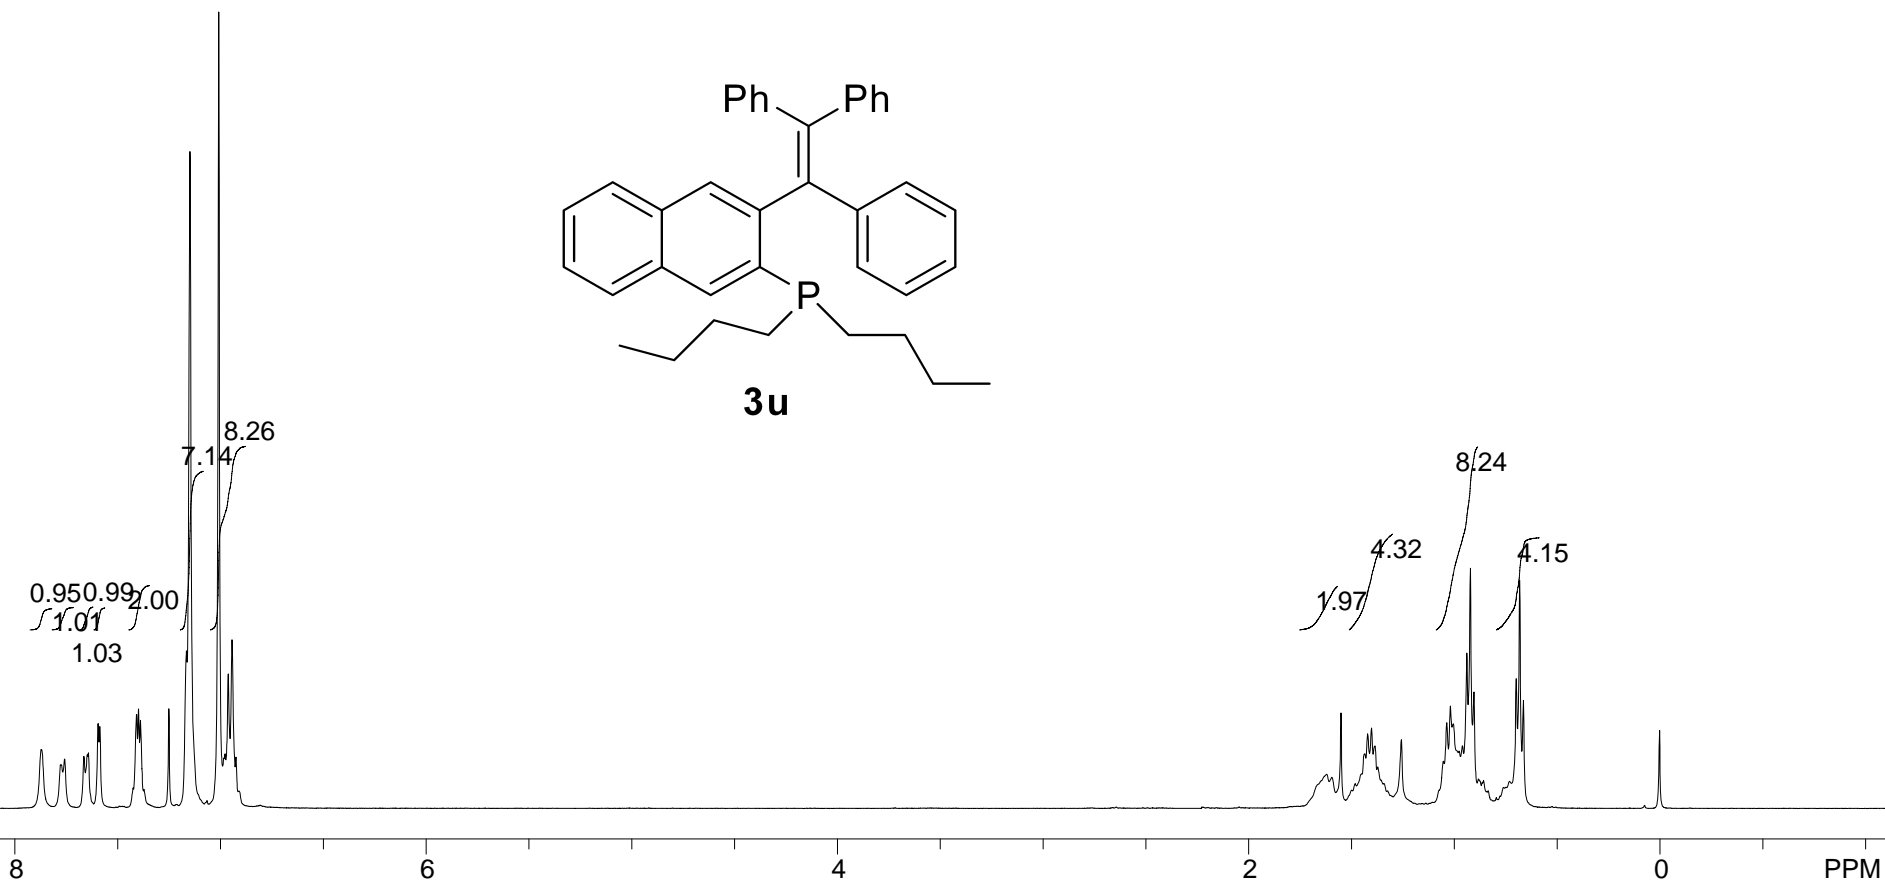

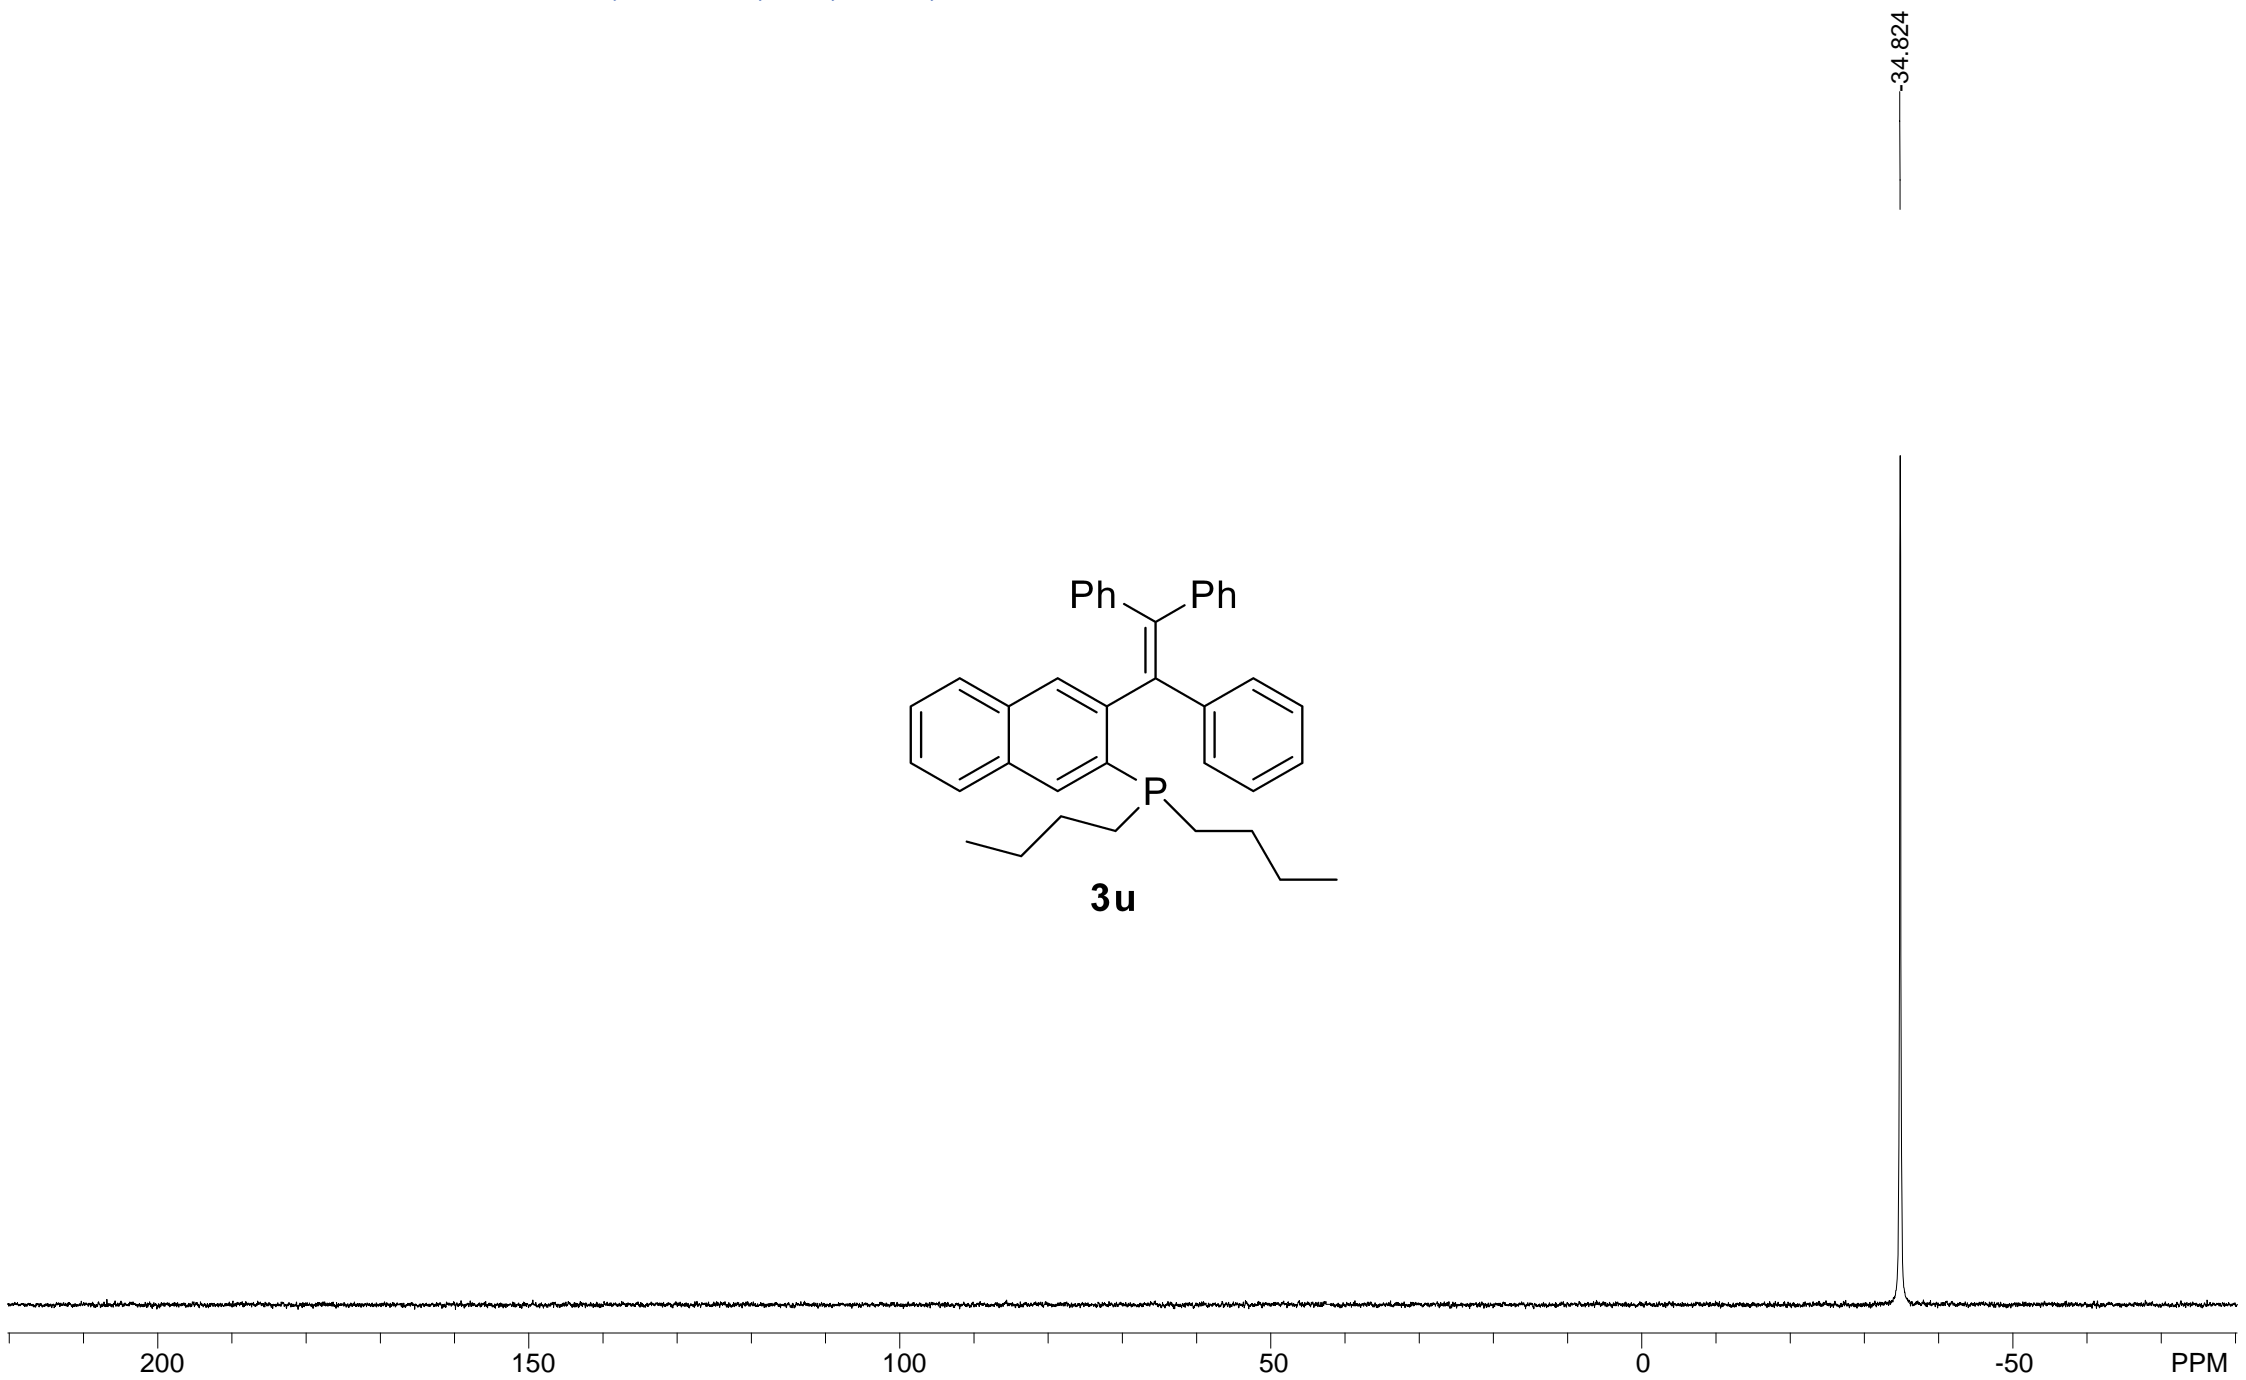

147.089  
146.785  
143.677  
143.358  
143.177  
141.237  
137.122  
133.286  
132.178  
131.771  
131.520  
131.253  
130.864  
130.223  
128.785  
127.856  
127.620  
127.482  
127.299  
126.454  
126.225  
125.612

77.321  
77.206  
77.000  
76.684

29.671  
28.816  
28.648  
28.089  
27.962  
27.566  
27.453  
24.838  
24.714  
24.321  
24.208  
13.966  
13.716

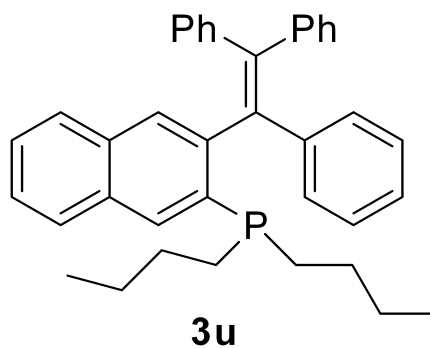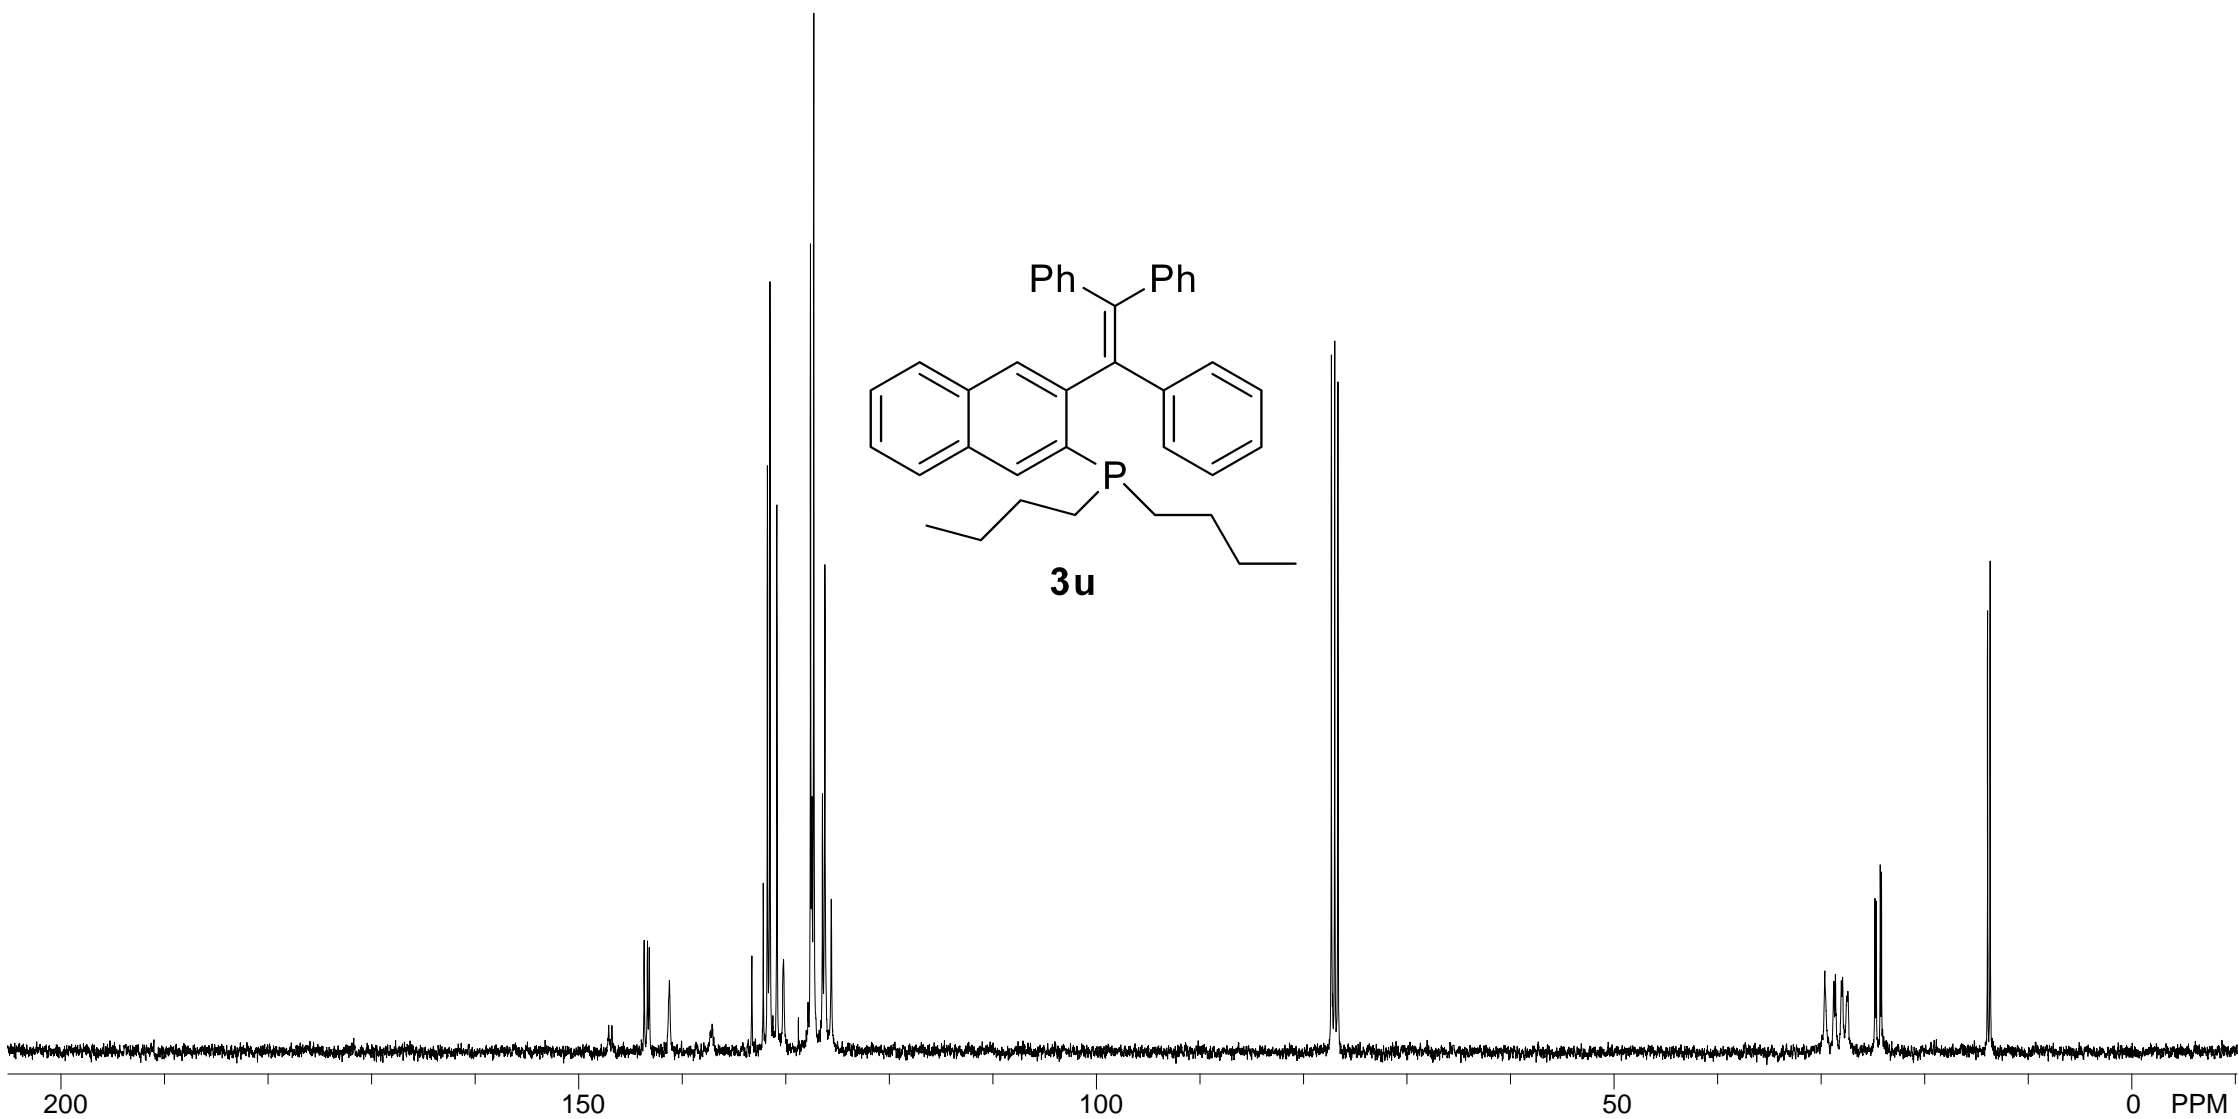

200

150

100

50

0 PPM

S120



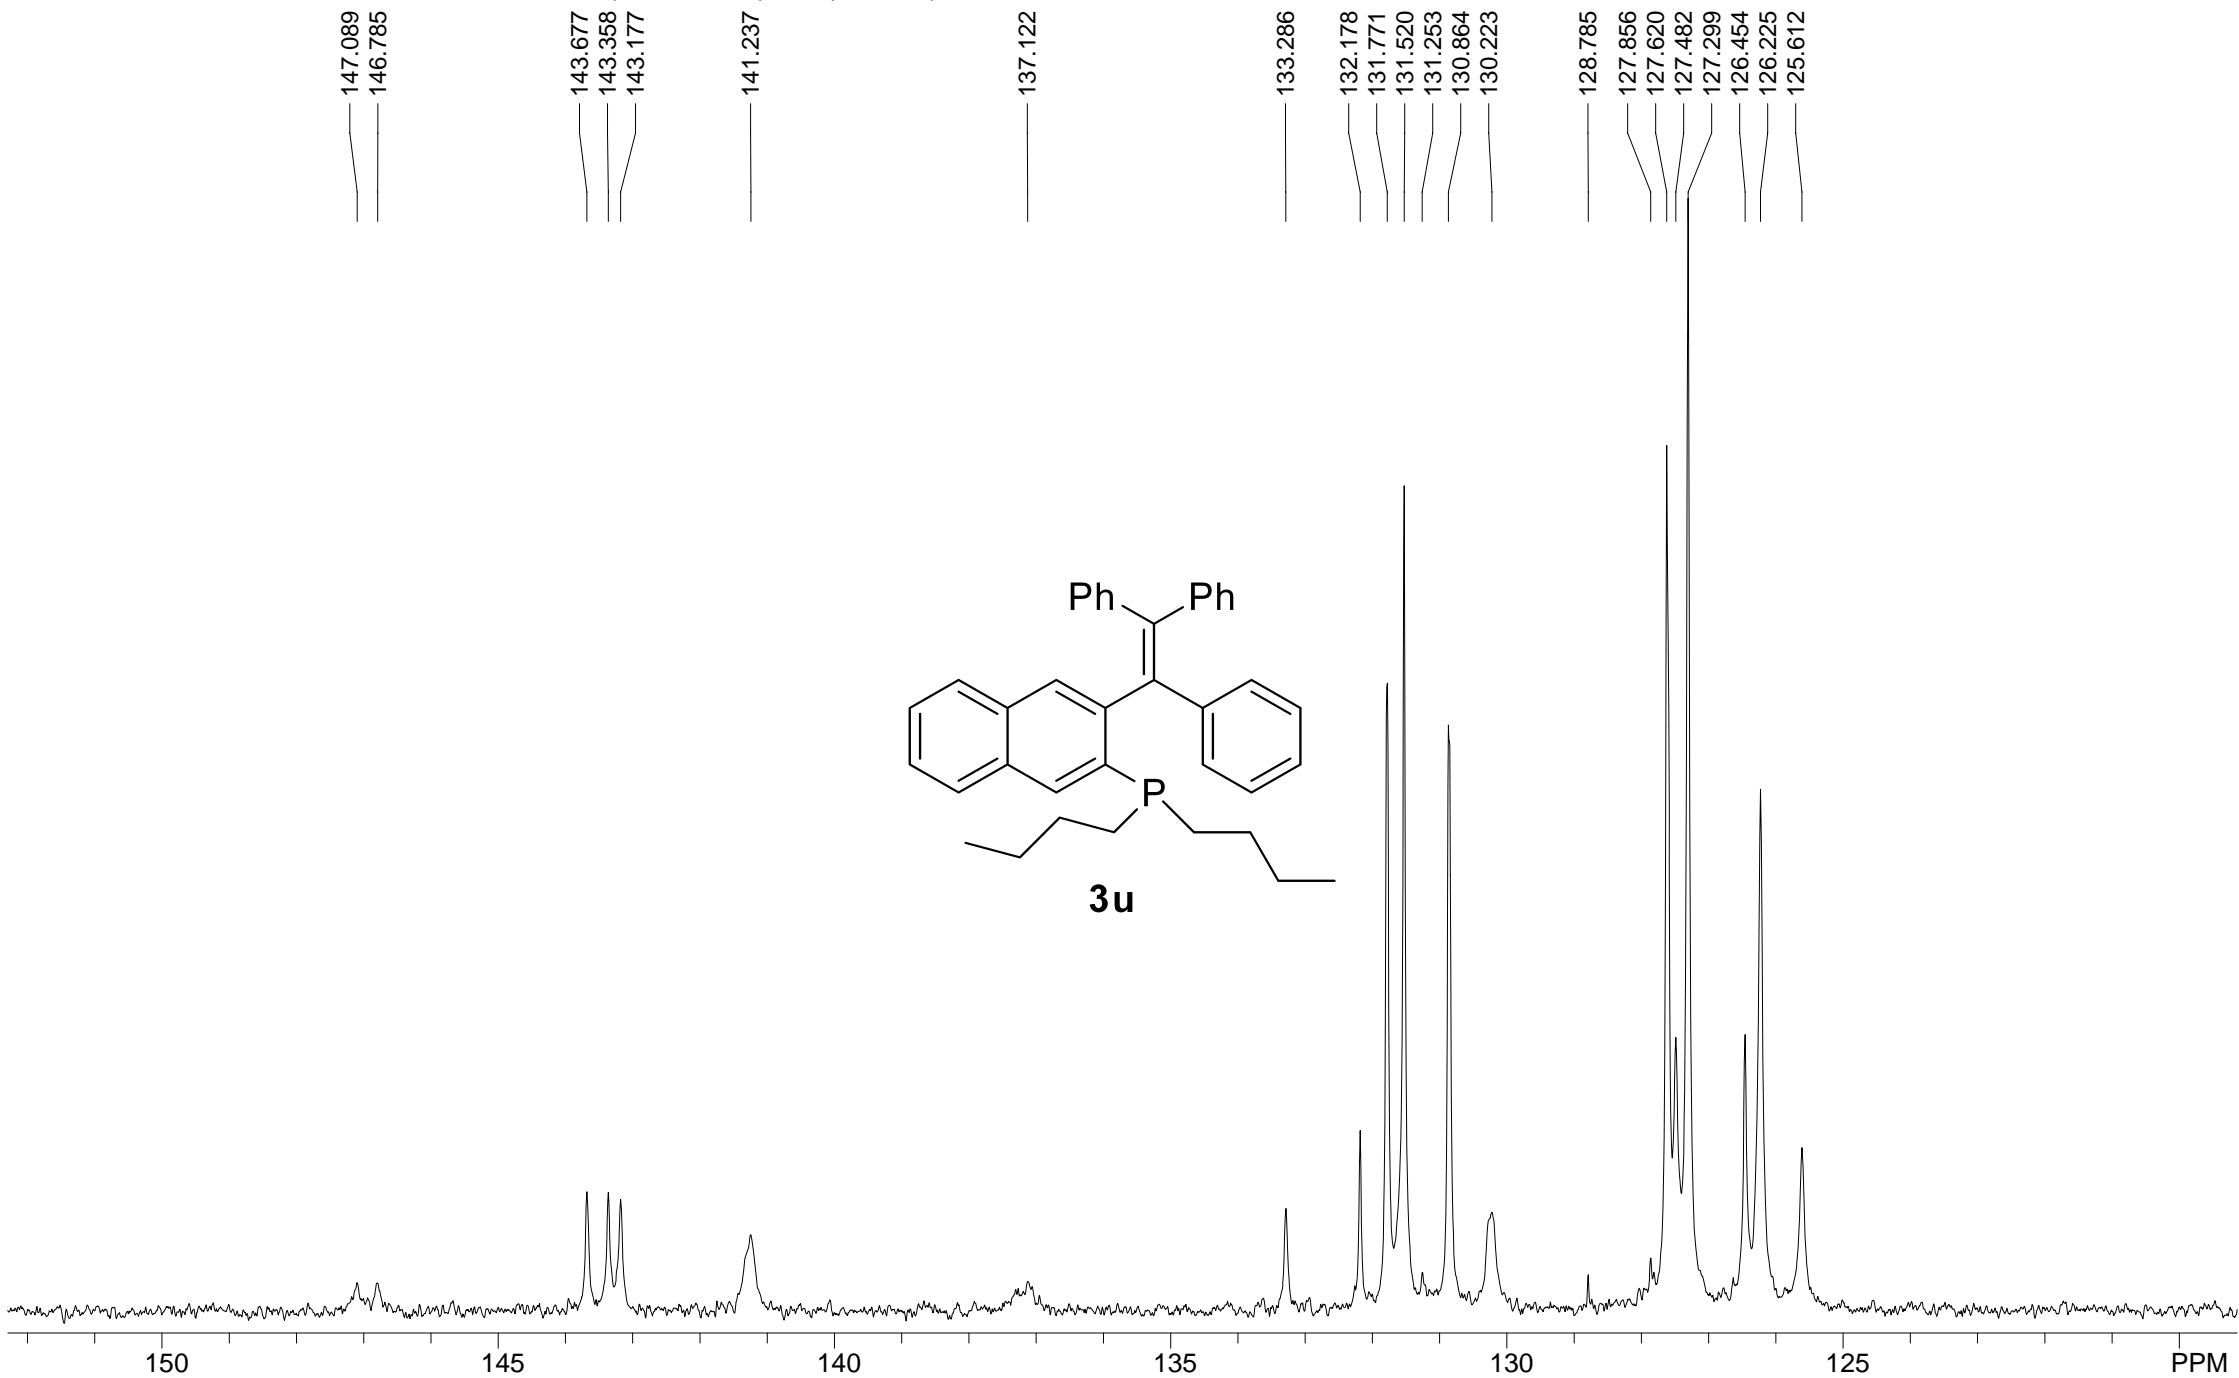

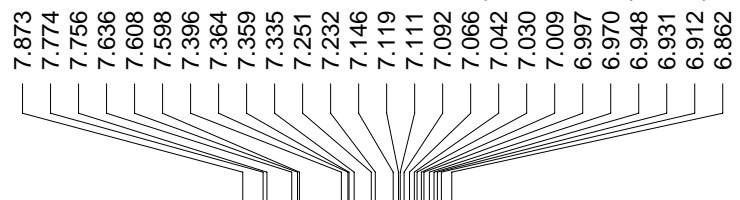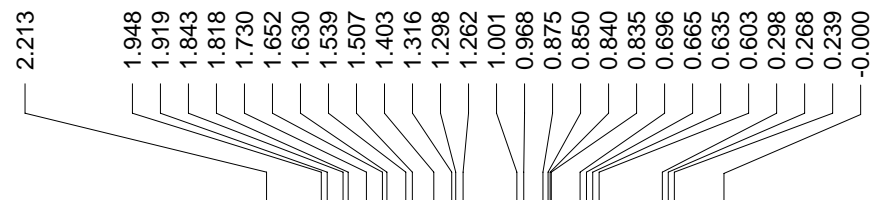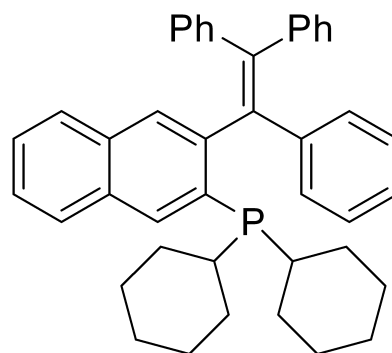

**3v**

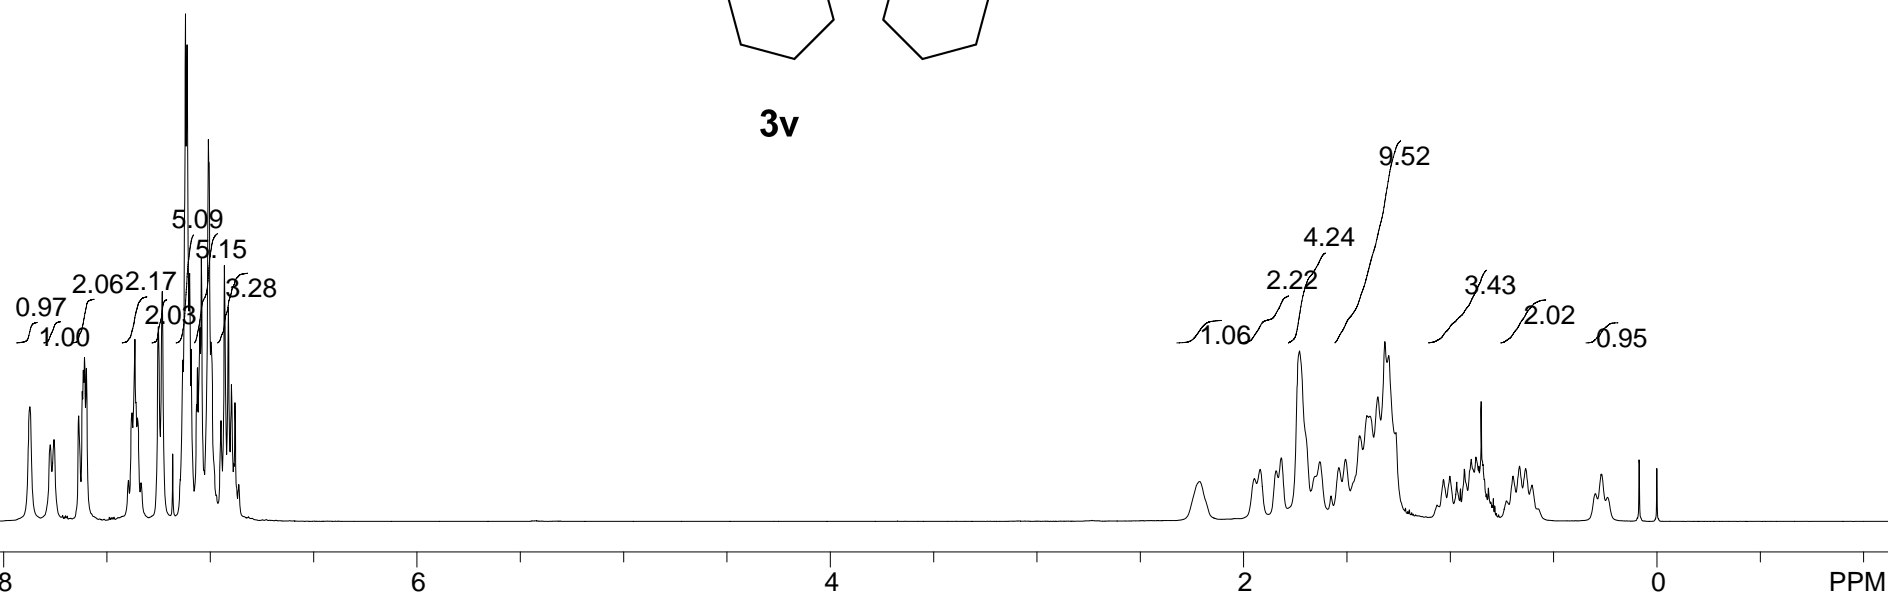

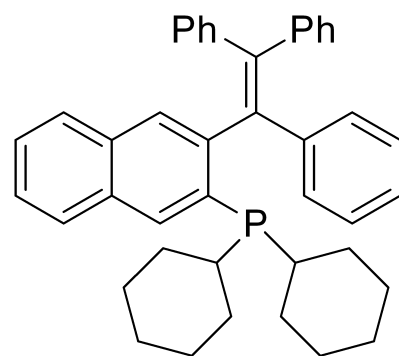

**3v**

-8.518

200

150

100

50

0

-50

PPM

S123

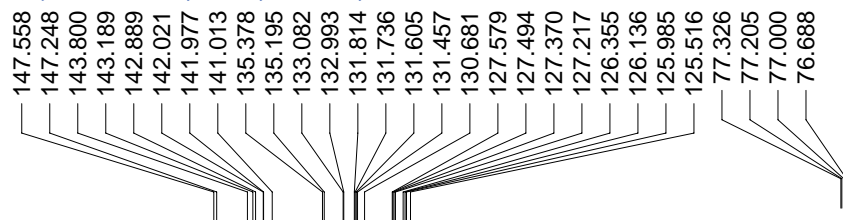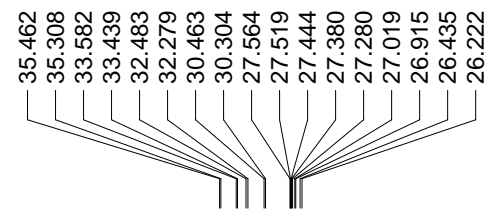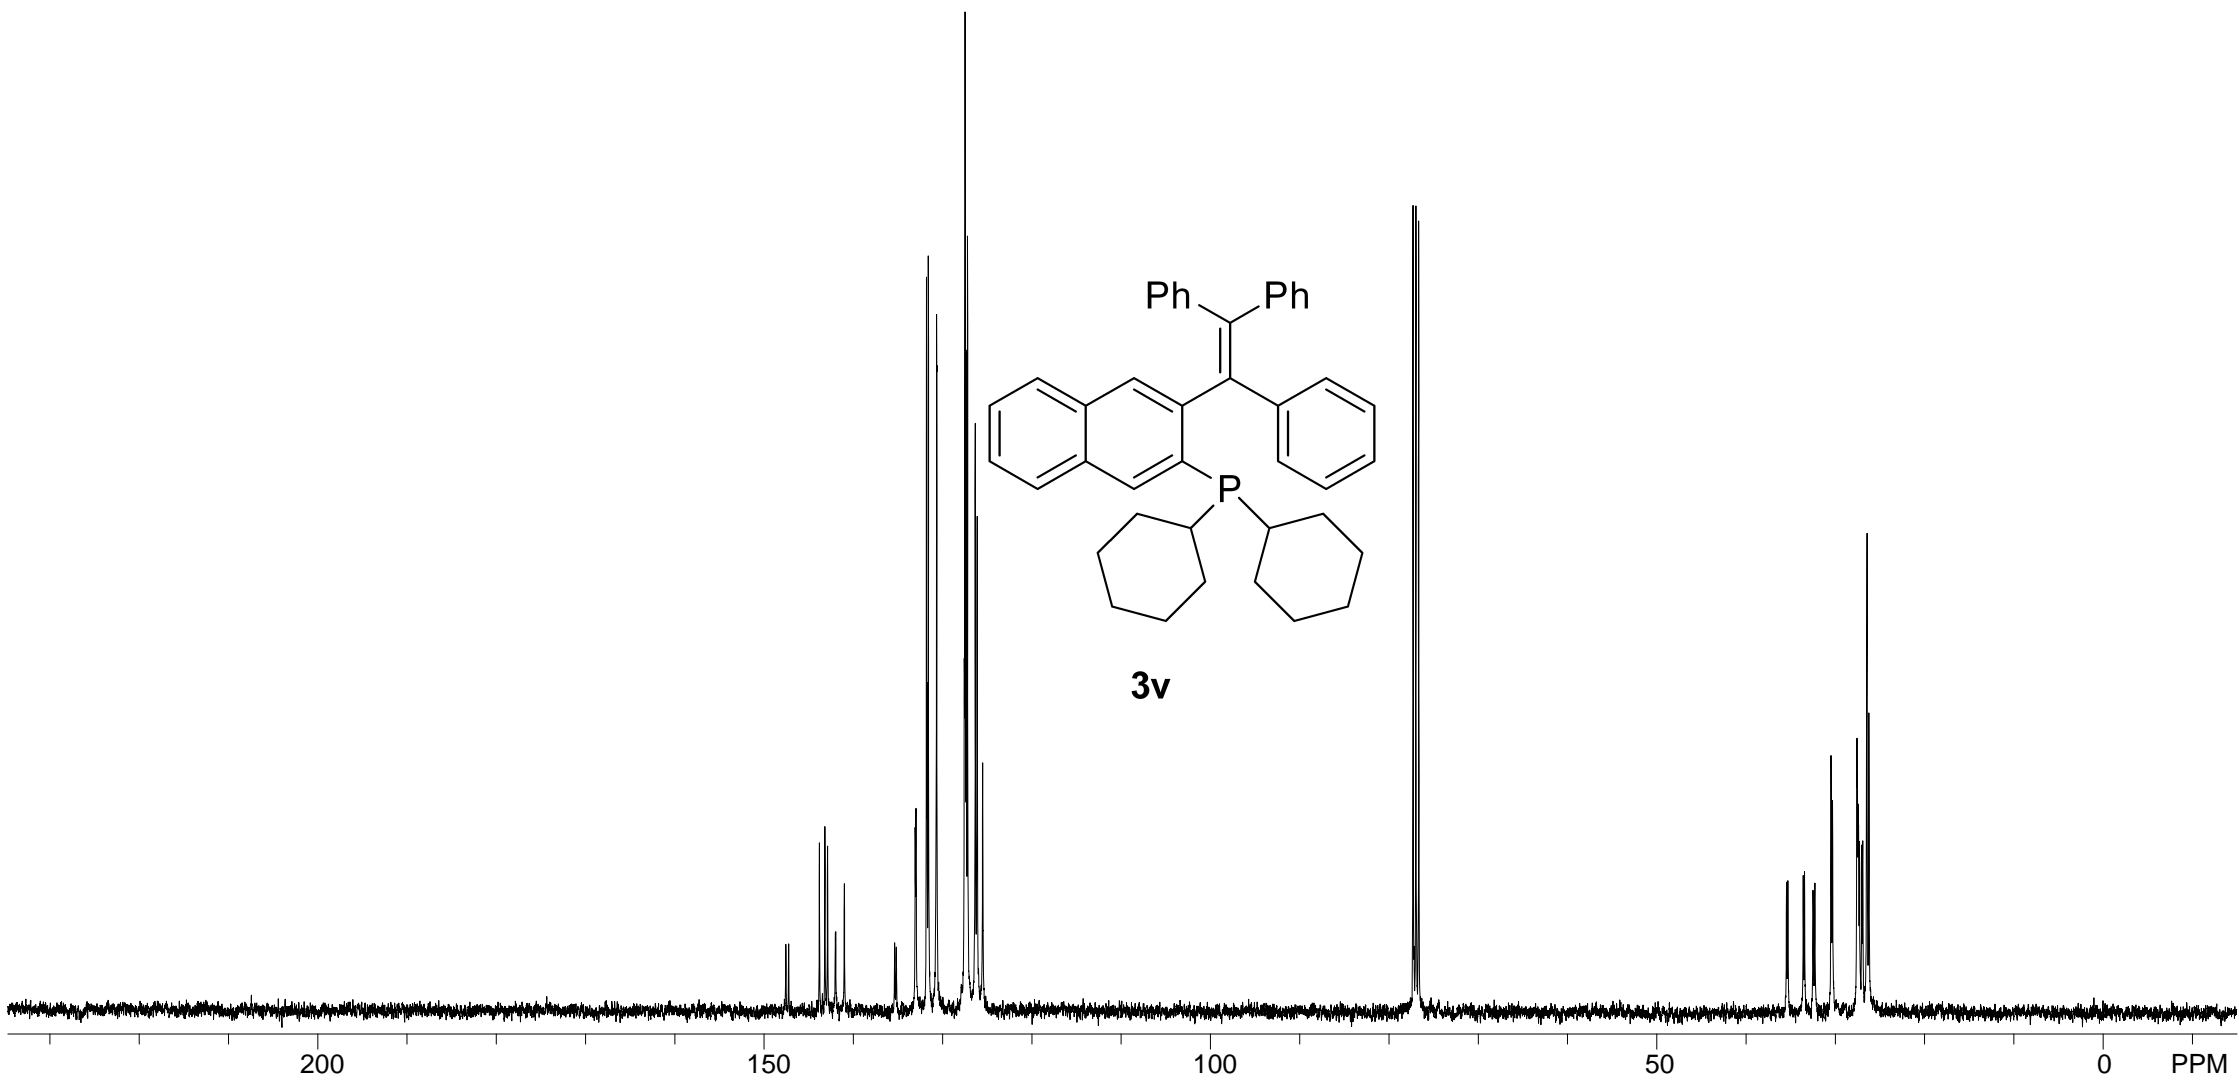

147.558  
147.248

143.800  
143.189  
142.889  
142.021  
141.977  
141.013

135.378  
135.195

133.082  
132.993

131.814  
131.736  
131.605  
131.457  
130.681

127.579  
127.494  
127.370  
127.217  
126.355  
126.136  
125.985  
125.516

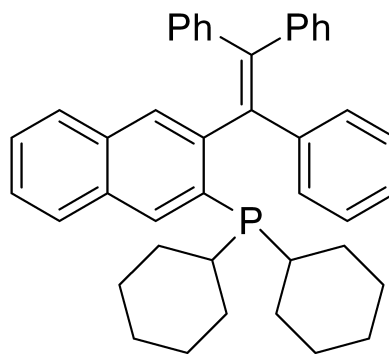

**3v**

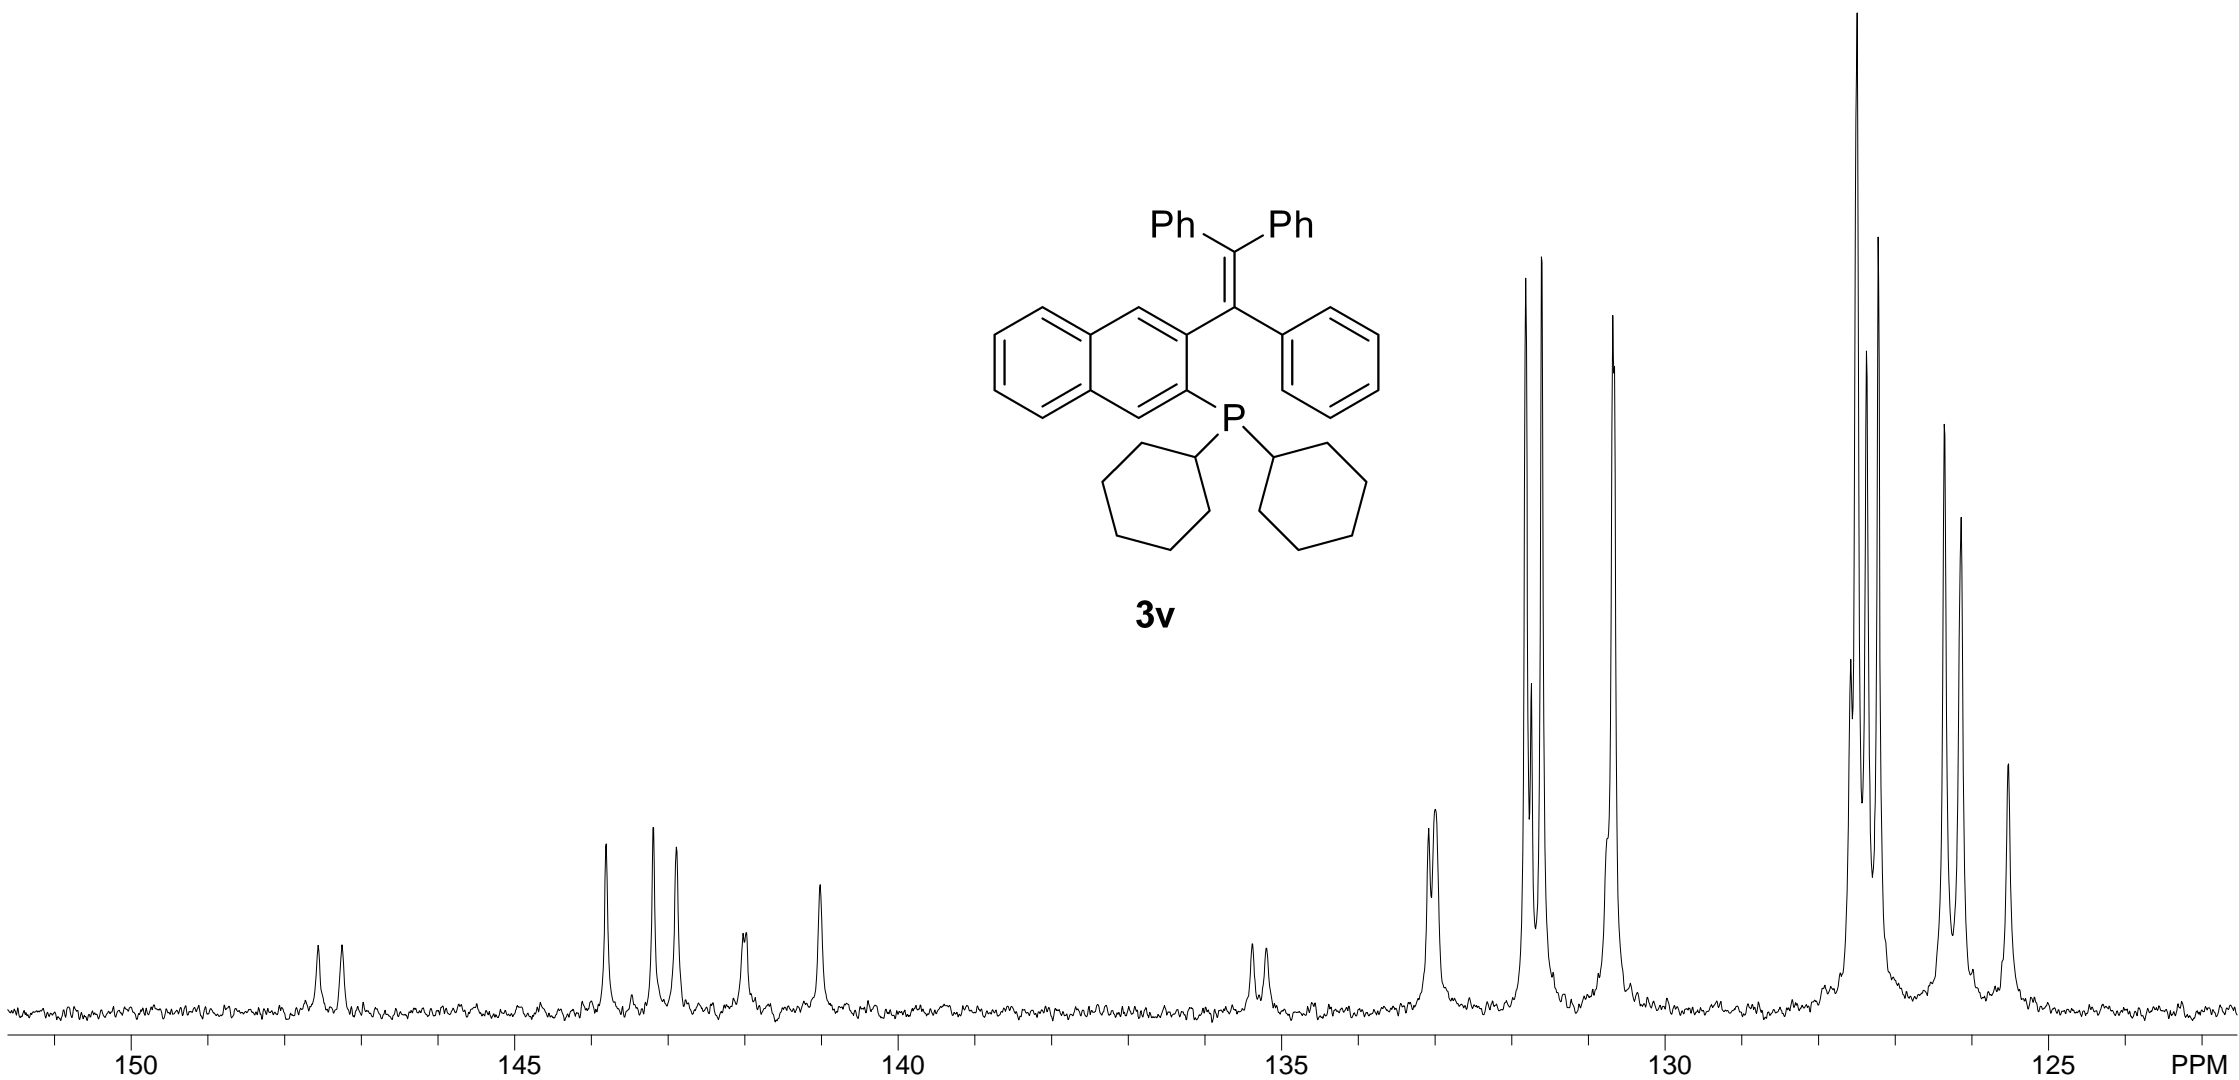

7.663  
7.645  
7.560  
7.542  
7.372  
7.346  
7.343  
7.326  
7.237  
7.219  
7.208  
7.193  
7.174  
7.155  
7.139  
7.128  
7.109  
6.954  
6.836

0.000

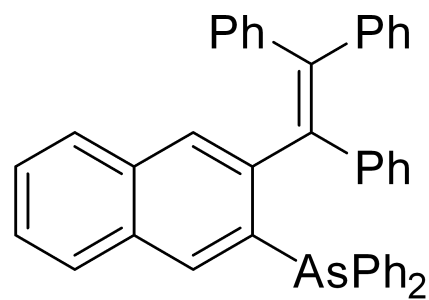

**3w**

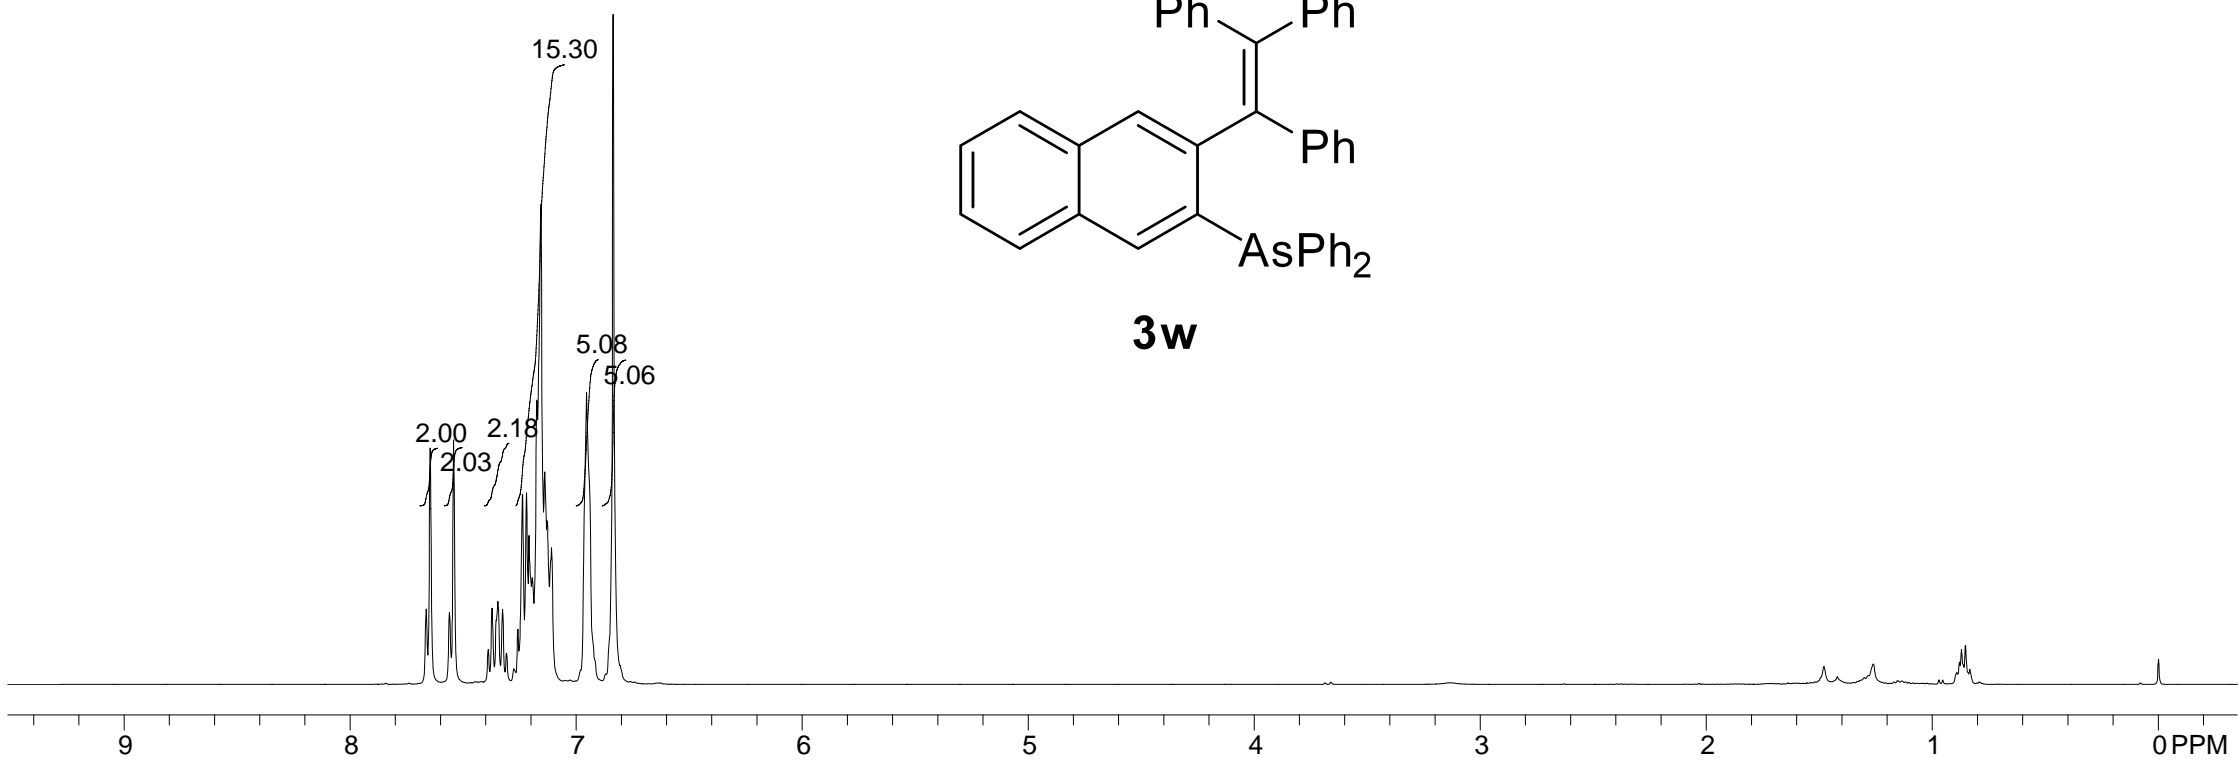

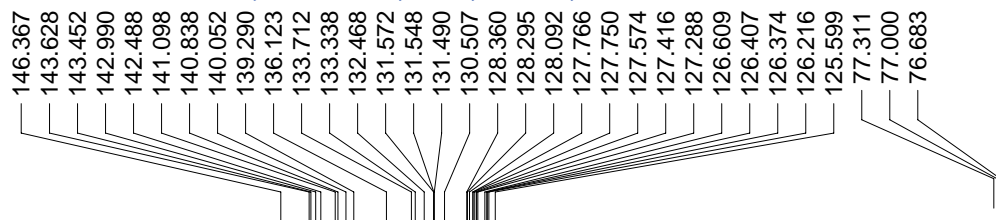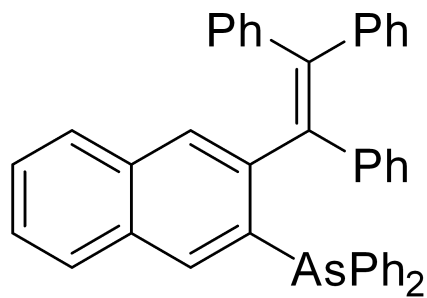

**3w**

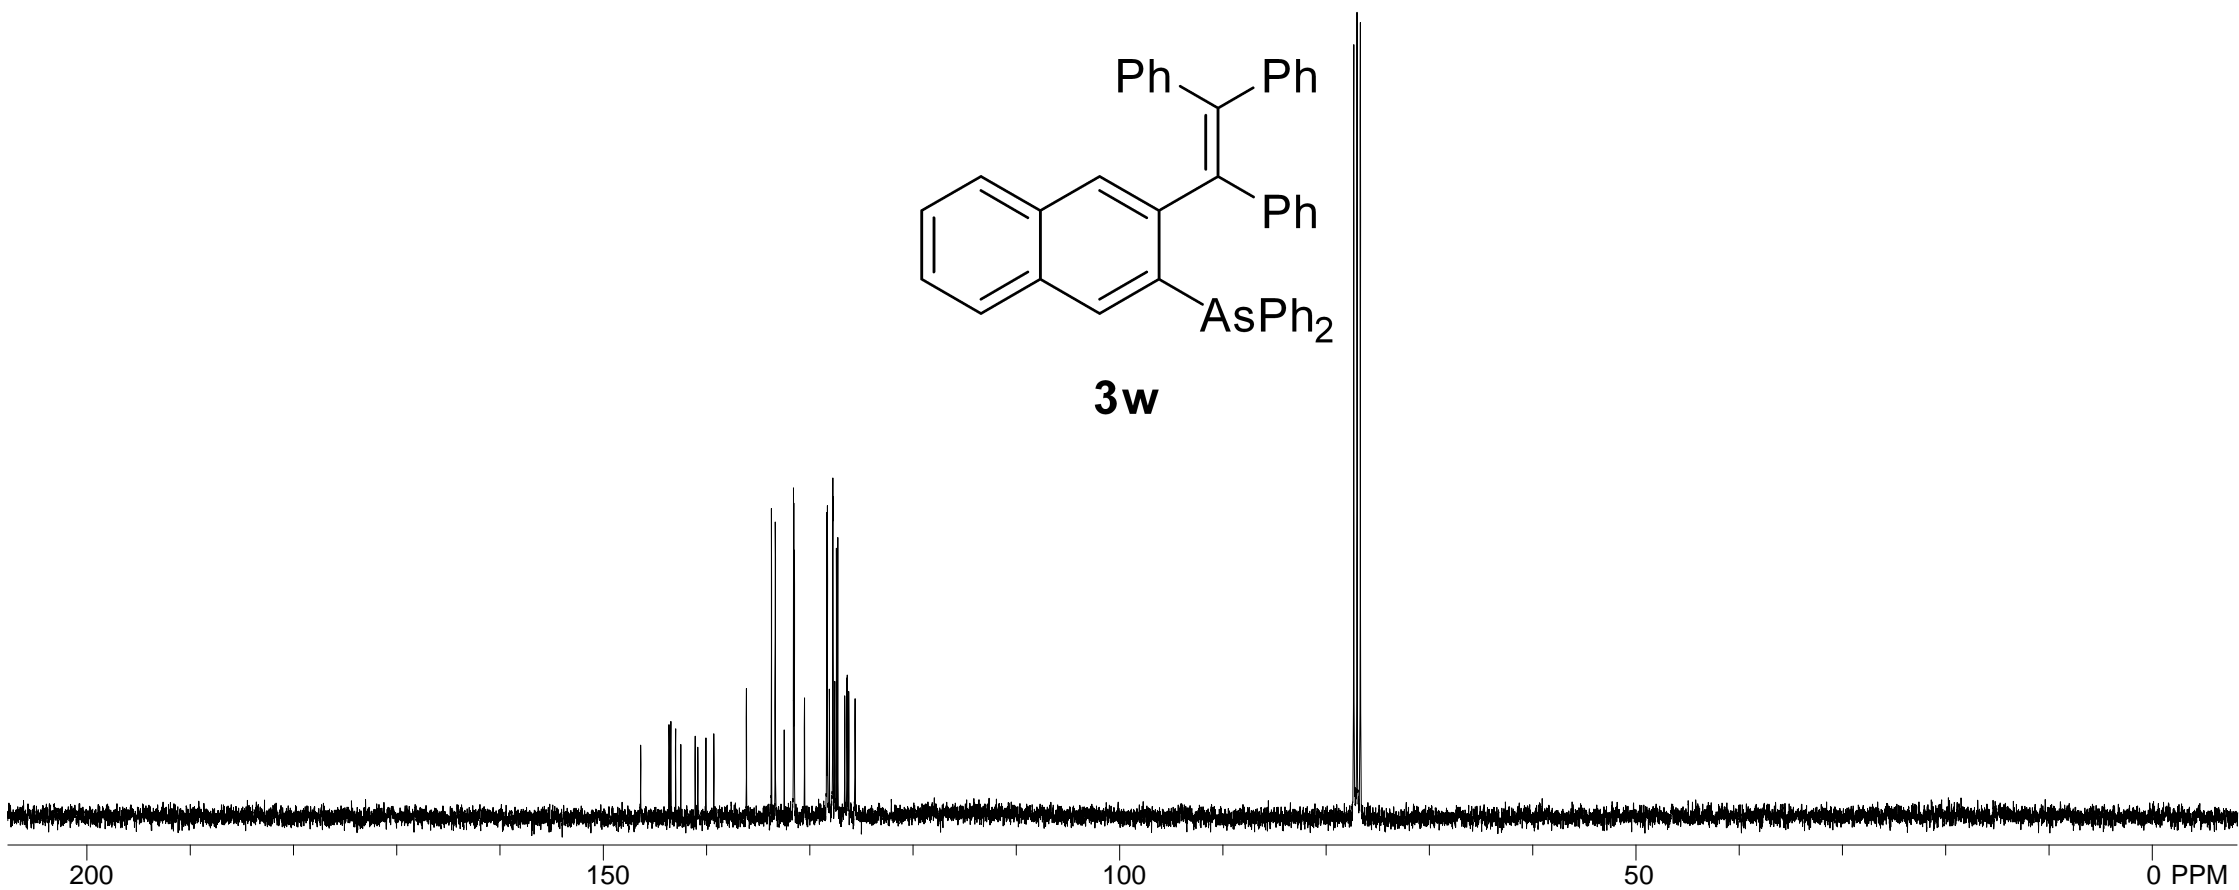

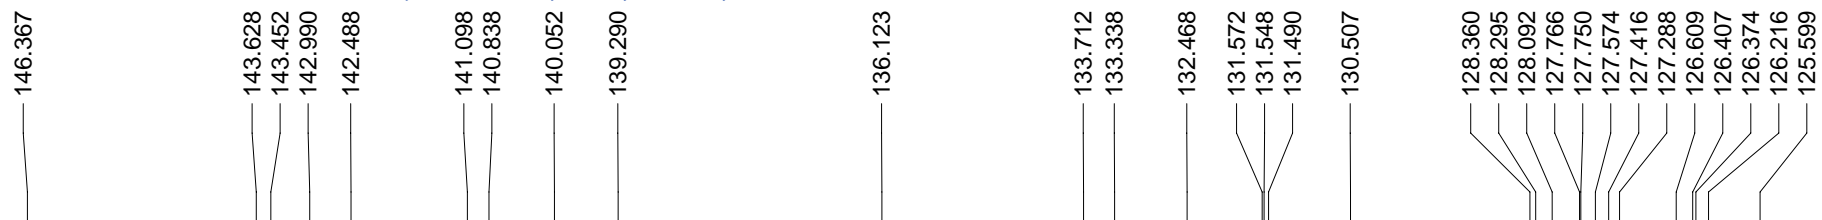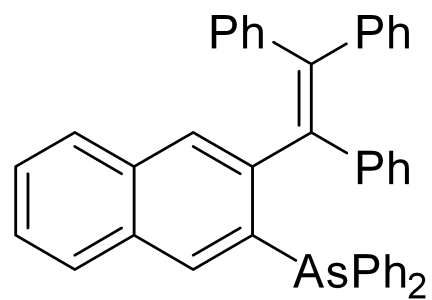

**3w**

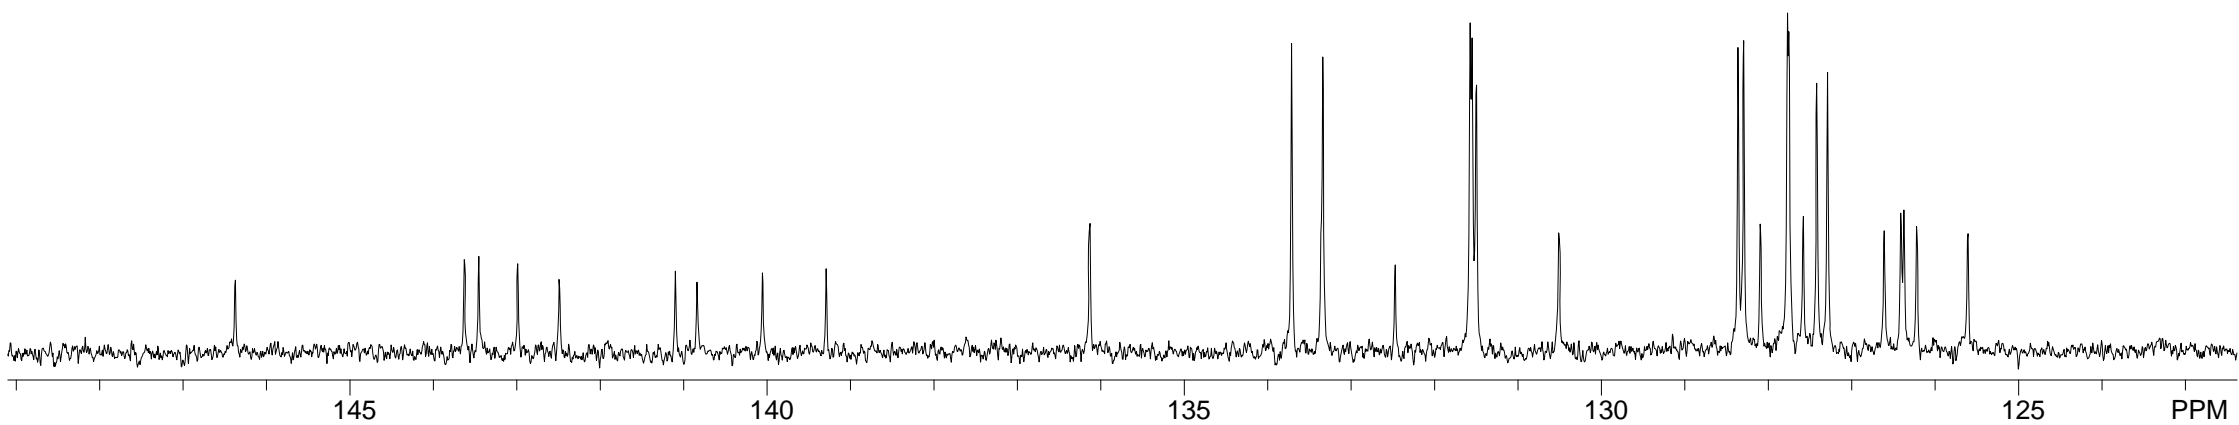

Supplement: c3cc43640c.pdf [file c3cc43640c.pdf]
